# Supplementary material for: Metal and metal oxide nanoparticle toxicity: moving towards a more holistic structure–activity approach
Source: Royal Society of Chemistry journal article supplement (doi:10.1039/d2en00897a), 2023-01-01
Supplement: d2en00897a1.xlsx [file d2en00897a1.xlsx]

## Sheet: All data
NP	Size (nm)	Exposure time	Endpoint	Value (mg/L)	Value(mol/L)	Cell/organism	Cell group	Log(endpoint)	reference
Ag	3	120 h	LC50	10.0775	9.331e-05	Danio rerio (embryos)	Fish	-4.03007	Bar-Ilan et al. Small 2009; 5 (16) 1897-1910
Ag	10	120 h	LC50	13.5713	0.00012566	Danio rerio (embryos)	Fish	-3.9008	Bar-Ilan et al. Small 2009; 5 (16) 1897-1910
Ag	50	120 h	LC50	13.7117	0.00012696	Danio rerio (embryos)	Fish	-3.89633	Bar-Ilan et al. Small 2009; 5 (16) 1897-1910
Ag	100	120 h	LC50	14.8241	0.00013726	Danio rerio (embryos)	Fish	-3.86246	Bar-Ilan et al. Small 2009; 5 (16) 1897-1910
Ag	20.4	48 h	EC50	0.003	2.77778e-08	Daphnia magna	Crustacean	-7.5563	Bondarenko et al. Nanotoxicology, 2016; 10(9): 1229–1242
Ag	20.4	30 min	EC50	2.9	2.68519e-05	Vibrio fischeri	Bacteria	-4.57103	Bondarenko et al. Nanotoxicology, 2016; 10(9): 1229–1242
Ag	20.4	96 h	EC50	3	2.77778e-05	danio rerio	Fish	-4.5563	Bondarenko et al. Nanotoxicology, 2016; 10(9): 1229–1242
Ag	20.4	4 h	EC50	3.1	2.87037e-05	Escherichia Coli	Bacteria	-4.54206	Bondarenko et al. Nanotoxicology, 2016; 10(9): 1229–1242
Ag	20.4	4 h	EC50	3.2	2.96296e-05	Pseudomonas aeruginosa	Bacteria	-4.52827	Bondarenko et al. Nanotoxicology, 2016; 10(9): 1229–1242
Ag	20.4	4 h	EC50	3.8	3.51852e-05	Pseudomonas putida	Bacteria	-4.45364	Bondarenko et al. Nanotoxicology, 2016; 10(9): 1229–1242
Ag	20.4	24 h	EC50	3.9	3.61111e-05	Tetrahymena thermophila	Eukaryotes & Microalgae	-4.44236	Bondarenko et al. Nanotoxicology, 2016; 10(9): 1229–1242
Ag	20.4	4 h	EC50	4.5	4.16667e-05	Bacillus subtilis	Bacteria	-4.38021	Bondarenko et al. Nanotoxicology, 2016; 10(9): 1229–1242
Ag	20.4	24 h	EC50	4.6	4.25926e-05	human mesenchymal stem cells (MTT)	Human cells	-4.37067	Bondarenko et al. Nanotoxicology, 2016; 10(9): 1229–1242
Ag	20.4	4 h	EC50	5.2	4.81481e-05	Staphylococcus aureus	Bacteria	-4.31742	Bondarenko et al. Nanotoxicology, 2016; 10(9): 1229–1242
Ag	20.4	24 h	EC50	6.4	5.92593e-05	human mesenchymal stem cells	Human cells	-4.22724	Bondarenko et al. Nanotoxicology, 2016; 10(9): 1229–1242
Ag	20.4	-	EC50	9.8	9.07407e-05	rat macrophages	Mammalian cells	-4.0422	Bondarenko et al. Nanotoxicology, 2016; 10(9): 1229–1242
Ag	50	24 h	LD50	48.2	0.00185185	Hacat cells	Human cells	-2.73239	Comfort et al. Colloids Surf B Biointerfaces,2014;123:136-42
Ag	20	24 h	EC50	15	0.000138889	RTgutGC	Fish	-3.85733	Geppert et al. Environ. Sci.: Nano, 2021,8, 2249-2260
Ag	26.6	48 h	LC50	0.04	3.7037e-07	Daphnia pulex (adults)	Crustacean	-6.43136	Griffit et al. Environm. Toxicol. Chem. 2008; 27 (9) 1972–1978
Ag	26.6	48 h	LC50	0.067	6.2037e-07	Ceriodaphnia dubia (neonates)	Crustacean	-6.20735	Griffit et al. Environm. Toxicol. Chem. 2008; 27 (9) 1972–1978
Ag	26.6	48 h	LC50	7.07	6.5463e-05	Danio rerio (adults)	Fish	-4.184	Griffit et al. Environm. Toxicol. Chem. 2008; 27 (9) 1972–1978
Ag	26.6	48 h	LC50	7.2	6.66667e-05	Danio rerio (juvenile)	Fish	-4.17609	Griffit et al. Environm. Toxicol. Chem. 2008; 27 (9) 1972–1978
Ag	10	48 h	LC50	0.004	3.7037e-08	Daphnia magna	Crustacean	-7.43136	Hoheisel et al. 2012, Environ. Toxicol. Chem. 31: 2557–2563
Ag	20	48 h	LC50	0.008	7.40741e-08	Daphnia magna	Crustacean	-7.13033	Hoheisel et al. 2012, Environ. Toxicol. Chem. 31: 2557–2563
Ag	10	48 h	LC50	0.01	9.25926e-08	Daphnia magna	Crustacean	-7.03342	Hoheisel et al. 2012, Environ. Toxicol. Chem. 31: 2557–2563
Ag	20	48 h	LC50	0.014	1.2963e-07	Daphnia magna	Crustacean	-6.8873	Hoheisel et al. 2012, Environ. Toxicol. Chem. 31: 2557–2563
Ag	30	48 h	LC50	0.018	1.66667e-07	Daphnia magna	Crustacean	-6.77815	Hoheisel et al. 2012, Environ. Toxicol. Chem. 31: 2557–2563
Ag	30	48 h	LC50	0.018	1.66667e-07	Daphnia magna	Crustacean	-6.77815	Hoheisel et al. 2012, Environ. Toxicol. Chem. 31: 2557–2563
Ag	50	48 h	LC50	0.024	2.22222e-07	Daphnia magna	Crustacean	-6.65321	Hoheisel et al. 2012, Environ. Toxicol. Chem. 31: 2557–2563
Ag	50	48 h	LC50	0.03	2.77778e-07	Daphnia magna	Crustacean	-6.5563	Hoheisel et al. 2012, Environ. Toxicol. Chem. 31: 2557–2563
Ag	<100	2 h	EC50	3.11	2.87963e-05	E. coli AS391	Bacteria	-4.54066	Ivansk et al Anal Bioanal Chem (2010) 398:701–716
Ag	<100	2 h	EC50	3.79	3.50926e-05	E. coli JI132	Bacteria	-4.45478	Ivansk et al Anal Bioanal Chem (2010) 398:701–716
Ag	<100	30 min	EC50	5.8	5.37037e-05	E. coli AS391	Bacteria	-4.27	Ivansk et al Anal Bioanal Chem (2010) 398:701–716
Ag	<100	30 min	EC50	17.9	0.000165741	E. coli JI132	Bacteria	-3.78057	Ivansk et al Anal Bioanal Chem (2010) 398:701–716
Ag	<100	2 h	EC50	18.8	0.000174074	E. coli JI131	Bacteria	-3.75927	Ivansk et al Anal Bioanal Chem (2010) 398:701–716
Ag	<100	2 h	EC50	19.7	0.000182407	E. coli AS393	Bacteria	-3.73896	Ivansk et al Anal Bioanal Chem (2010) 398:701–716
Ag	<100	2 h	EC50	30.9	0.000286111	E. coli JI130	Bacteria	-3.54347	Ivansk et al Anal Bioanal Chem (2010) 398:701–716
Ag	<100	2 h	EC50	45.9	0.000425	E. coli AB1157	Bacteria	-3.37161	Ivansk et al Anal Bioanal Chem (2010) 398:701–716
Ag	<100	30 min	EC50	329	0.0030463	E. coli AS393	Bacteria	-2.51623	Ivansk et al Anal Bioanal Chem (2010) 398:701–716
Ag	<100	30 min	EC50	331	0.00306481	E. coli JI130	Bacteria	-2.5136	Ivansk et al Anal Bioanal Chem (2010) 398:701–716
Ag	<100	30 min	EC50	485	0.00449074	E. coli JI131	Bacteria	-2.34768	Ivansk et al Anal Bioanal Chem (2010) 398:701–716
Ag	<100	30 min	EC50	571	0.00528704	E. coli AB1157	Bacteria	-2.27679	Ivansk et al Anal Bioanal Chem (2010) 398:701–716
Ag		48 h	LC50	2.7	2.5e-05	Danio rerio (eggs)	Fish	-4.60206	Kovrižnychet al. Interdisciplinary Toxicology. 2013; Vol. 6(2): 67–73
Ag		48 h	LC50	2.9	2.68519e-05	Danio rerio (adults)	Fish	-4.57103	Kovrižnychet al. Interdisciplinary Toxicology. 2013; Vol. 6(2): 67–73
Ag	20	120 h	LC50	0.529	4.89815e-06	Danio rerio embryos	Fish	-5.30997	Lacave et al. Nanotechnology 27 (2016) 325102
Ag	100	120 h	LC50	1.973	1.82685e-05	Danio rerio embryos	Fish	-4.7383	Lacave et al. Nanotechnology 27 (2016) 325102
Ag	40	120 h	LC50	3.94	3.64815e-05	Danio rerio embryos	Fish	-4.43793	Lacave et al. Nanotechnology 27 (2016) 325102
Ag	312	24 h	IC50	19.33	0.000178981	THP-1	Human cells	-3.74719	Lanone et al. Particle and Fibre Toxicology 2009, 6, 14
Ag	312	24 h	IC50	42.67	0.000395093	a549	Human cells	-3.4033	Lanone et al. Particle and Fibre Toxicology 2009, 6, 14
Ag	312	24 h	IC50	55.6	0.000514815	THP-1	Human cells	-3.28835	Lanone et al. Particle and Fibre Toxicology 2009, 6, 14
Ag	312	24 h	IC50	1408	0.013037	THP-1	Human cells	-1.88482	Lanone et al. Particle and Fibre Toxicology 2009, 6, 14
Ag	312	24 h	IC50	380.9	0.00352685	a549	Human cells	-2.45261	Lanone et al. Particle and Fibre Toxicology 2009, 6, 14
Ag	312	24 h	IC50	18.36	0.00017	THP-1	Human cells	-3.76955	Lanone et al. Particle and Fibre Toxicology 2009, 6, 14
Ag	312	24 h	IC50	27.6	0.000255556	THP-1	Human cells	-3.59251	Lanone et al. Particle and Fibre Toxicology 2009, 6, 14
Ag	5	24 h	EC50	0.5	4.62963e-06	MCF‐7	Human cells	-5.33445	Liu et al. Nanotoxicology, 2010; 4(3): 319–330
Ag	5	24 h	EC50	0.59	5.46296e-06	HepG2	Human cells	-5.26257	Liu et al. Nanotoxicology, 2010; 4(3): 319–330
Ag	5	24 h	EC50	1	9.25926e-06	A549	Human cells	-5.03342	Liu et al. Nanotoxicology, 2010; 4(3): 319–330
Ag	5	24 h	EC50	9.9	9.16667e-05	SGC‐7901	Human cells	-4.03779	Liu et al. Nanotoxicology, 2010; 4(3): 319–330
Ag	20	24 h	EC50	9.96	9.22222e-05	A549	Human cells	-4.03516	Liu et al. Nanotoxicology, 2010; 4(3): 319–330
Ag	50	24 h	EC50	13.3	0.000123148	A549	Human cells	-3.90957	Liu et al. Nanotoxicology, 2010; 4(3): 319–330
Ag	20	24 h	EC50	14.3	0.000132407	MCF‐7	Human cells	-3.87809	Liu et al. Nanotoxicology, 2010; 4(3): 319–330
Ag	20	24 h	EC50	25.5	0.000236111	HepG2	Human cells	-3.62688	Liu et al. Nanotoxicology, 2010; 4(3): 319–330
Ag	50	24 h	EC50	33.6	0.000311111	HepG2	Human cells	-3.50708	Liu et al. Nanotoxicology, 2010; 4(3): 319–330
Ag	50	24 h	EC50	47.6	0.000440741	MCF‐7	Human cells	-3.35582	Liu et al. Nanotoxicology, 2010; 4(3): 319–330
Ag	20	24 h	EC50	50.9	0.000471296	SGC‐7901	Human cells	-3.32671	Liu et al. Nanotoxicology, 2010; 4(3): 319–330
Ag	50	24 h	EC50	112	0.00103704	SGC‐7901	Human cells	-2.98421	Liu et al. Nanotoxicology, 2010; 4(3): 319–330
Ag	30	48 h	EC50	0.45	4.16667e-06	Saccharomyces cerevisae	Eukaryotes & Microalgae	-5.38021	Zhang et al., J Nanopart Res (2016) 18 (2), 372
Ag	30	6 h	EC50	3.86	3.57407e-05	Saccharomyces cerevisae	Eukaryotes & Microalgae	-4.44684	Zhang et al., J Nanopart Res (2016) 18 (2), 372
Ag	-	24 h	EC50	78.9	0.000730556	HeLa cells	Human cells	-3.13635	Kim et al. Bull. Korean Chem. Soc. 2012, Vol. 33, No. 10
Ag	-	24 h	EC50	88.6	0.00082037	PC3	Human cells	-3.08599	Kim et al. Bull. Korean Chem. Soc. 2012, Vol. 33, No. 10
Ag2O	-	16 h	IC50	9	3.86266e-05	E.coli	Bacteria	-4.41311	Negi et al. J Gen Appl Microbiol. 2013;59(1):83-8
Ag2O	-	16 h	IC50	9	3.86266e-05	P. aeruginosa	Bacteria	-4.41311	Negi et al. J Gen Appl Microbiol. 2013;59(1):83-8
Ag2O	-	16 h	IC50	18	7.72532e-05	B. aerius	Bacteria	-4.11208	Negi et al. J Gen Appl Microbiol. 2013;59(1):83-8
Ag2O	-	16 h	IC50	18	7.72532e-05	B. circulans	Bacteria	-4.11208	Negi et al. J Gen Appl Microbiol. 2013;59(1):83-8
Ag2O	-	6 days	EC50	109.98	0.000474052	Vignia radiata	Plants	-3.32417	Singh et al. Bull Environ Contam Toxicol (2015) 95:379–384
Ag2O	-	6 days	EC50	122	0.000525862	Vignia radiata	Plants	-3.27913	Singh et al. Bull Environ Contam Toxicol (2015) 95:379–384
Ag2O	-	6 days	EC50	144	0.00062069	Vignia radiata	Plants	-3.20713	Singh et al. Bull Environ Contam Toxicol (2015) 95:379–384
Al	41.7	48 h	LC50	3.99	0.000147778	Ceriodaphnia dubia (neonates)	Crustacean	-3.83039	Griffit et al. Environm. Toxicol. Chem. 2008; 27 (9) 1972–1978
Al	18	2 h	IC50	2000	0.0740741	Brassica napus	Plant	-1.13033	Lin et al. Environm. Pollut. 2007 150 (2) 243-250
Al	18	2 h	IC50	2000	0.0740741	Lolium perenne	Plants	-1.13033	Lin et al. Environm. Pollut. 2007 150 (2) 243-250
Al	18	2 h	IC50	2000	0.0740741	Raphanus sativus	Plants	-1.13033	Lin et al. Environm. Pollut. 2007 150 (2) 243-250
Al2O3	28.15	24 h	ec50 (in SFM medium)	>150	#VALUE!	A549 cells	Human cells	#VALUE!	Areecheewakul, et al. NanoImpact 18 (2020) 100214
Al2O3	28.15	24 h	ec50 (in SCM medium)	>150	#VALUE!	A549 cells	Human cells	#VALUE!	Areecheewakul, et al. NanoImpact 18 (2020) 100214
Al2O3	11.9	24 h	EC50	705.668	0.00691831	A549 cells	Human cells	-2.16	Cao et al. Green Chem., 2020,22, 3512-3521
Al2O3	44	24 h	LC50	1439	0.0141078	Hacat cells	Human cells	-1.85054	Gajewicz et al. Nanotoxicology, 2015;9(3):313-25
Al2O3	50	10 h	IC50	1000	0.00980392	Saccharomyces cerevisae	Eukaryotes & Microalgae	-2.0086	García-Saucedo et al. / Journal of Hazardous Materials 192 (2011) 1572–1579
Al2O3	50	10 h	IC50	1000	0.00980392	Saccharomyces cerevisae	Eukaryotes & Microalgae	-2.0086	García-Saucedo et al. / Journal of Hazardous Materials 192 (2011) 1572–1579
Al2O3	50	10 h	EC50	1000	0.00980392	Saccharomyces cerevisae	Eukaryotes & Microalgae	-2.0086	García-Saucedo et al. / Journal of Hazardous Materials 192 (2011) 1572–1579
Al2O3	31	24 h	ec50	1000	0.00980392	A549	Human cells	-2.0086	Horie et al. Metallomics, 2012, 4, 350–360
Al2O3	31	24 h	ec50	1000	0.00980392	Hacat	Human cells	-2.0086	Horie et al. Metallomics, 2012, 4, 350–360
Al2O3	30-40	2 h	LD50	326.1	0.00319706	E.coli	Bacteria	-2.49525	Hu et al. Sci. Total Environ. 407 (2009) 3070–3072
Al2o3	40-47	12 h	EC50	>200	#VALUE!	Neuro 2A cells	Mammalian cells	#VALUE!	Jeng et al. ron Sci Health A Tox Hazard Subst Environ Eng. 2006;41(12):2699-711
Al2O3	14.7	24 h	IC50	500	0.00490196	E.coli	Bacteria	-2.30963	Kaweeteerawat et al. Environ. Sci. Technol. 2015, 49, 1105−1112
Al2O3	40-50	4 days	EC50	1000	0.00980392	Lactuca sativa L.	Plants	-2.0086	Kong et al. Nanomaterials 2021, 11, 1653
Al2O3	40-50	4 days	EC50	1000	0.00980392	Lactuca sativa L.	Plants	-2.0086	Kong et al. Nanomaterials 2021, 11, 1653
Al2O3	40-50	4 days	EC50	1000	0.00980392	Raphanus sativus	Plants	-2.0086	Kong et al. Nanomaterials 2021, 11, 1653
Al2O3	<50	48 h	LC50	800	0.00784314	Danio rerio (adults)	Fish	-2.10551	Kovrižnychet al. Interdisciplinary Toxicology. 2013; Vol. 6(2): 67–73
Al2O3	<50	48 h	LC50	800	0.00784314	Danio rerio (eggs)	Fish	-2.10551	Kovrižnychet al. Interdisciplinary Toxicology. 2013; Vol. 6(2): 67–73
Al2O3	40-68	24 h	IC50	82.19	0.000805784	THP-1	Human cells	-3.09378	Lanone et al. Particle and Fibre Toxicology 2009, 6, 14
Al2O3	40-68	24 h	IC50	866	0.0084902	THP-1	Human cells	-2.07108	Lanone et al. Particle and Fibre Toxicology 2009, 6, 14
Al2O3	40-68	24 h	IC50	672.5	0.00659314	THP-1	Human cells	-2.18091	Lanone et al. Particle and Fibre Toxicology 2009, 6, 14
Al2O3	83.5	48 h	LC50	9269.2	0.0908745	P. multimicronucleatum	Eukaryotes & Microalgae	-1.04156	Li et al. 2012, Chem. Res. Toxicol, 25, 1675−1681
Al2O3	60	2 h	IC50	2000	0.0196078	Brassica napus	Plant	-1.70757	Lin et al. Environm. Pollut. 2007 150 (2) 243-250
Al2O3	60	2 h	IC50	2000	0.0196078	Lolium perenne	Plants	-1.70757	Lin et al. Environm. Pollut. 2007 150 (2) 243-250
Al2O3	60	2 h	IC50	2000	0.0196078	Raphanus sativus	Plants	-1.70757	Lin et al. Environm. Pollut. 2007 150 (2) 243-250
Al2O3	55	30 min	LC50	387.793	0.00380189	E.coli	Bacteria	-2.42	Pathakoti et al. Journal of Photochemistry and Photobiology B: Biology 130 (2014) 234–240
Al2O3	15-90	2 h	EC50	330.066	0.00323594	E.coli	Bacteria	-2.49	Puzyn et al. Nature Nanotech 6, 175–178 (2011)
Al2O3	14.7	24 h	EC50	>200	#VALUE!	BEAS-2B cells, ATP assay	Human cells	#VALUE!	Zhang et al. ACS Nano 2012, 6, 5, 4349–4368
Al2O3	14.7	24 h	EC50	>200	#VALUE!	BEAS-2B cells, MTS assay	Human cells	#VALUE!	Zhang et al. ACS Nano 2012, 6, 5, 4349–4368
Al2O3	14.7	24 h	EC50	>200	#VALUE!	RAW 2647 cells, ATP assay	Mammalian cells	#VALUE!	Zhang et al. ACS Nano 2012, 6, 5, 4349–4368
Al2O3	14.7	24 h	EC50	>200	#VALUE!	RAW 2647 cells, MTS assay	Mammalian cells	#VALUE!	Zhang et al. ACS Nano 2012, 6, 5, 4349–4368
Al2O3	80	96 h	LC50	1000	0.00980392	Danio rerio (embryos)	Fish	-2.0086	Zhu et al., J. Environ. Sci. Health A Tox. Hazard Subst. Environ. Eng. 2008; 43 (3) 278-284
Al2O3	80	84 h	eC50	1000	0.00980392	Danio rerio (embryos)	Fish	-2.0086	Zhu et al., J. Environ. Sci. Health A Tox. Hazard Subst. Environ. Eng. 2008; 43 (3) 278-284
Al2O3	80	48 h	LC50	500	0.00490196	Daphnia magna (neonates)	Crustacean	-2.30963	Zhu et al., J. Nanopart. Res. 2009; 11 (1) 67–75
Al2O3	80	48 h	EC50	500	0.00490196	Daphnia magna (neonates)	Crustacean	-2.30963	Zhu et al., J. Nanopart. Res. 2009; 11 (1) 67–75
Au	5	24 h	LC50	76.358	0.000387604	hemocytes	other	-3.41161	Katsumiti et al. Nanotoxicology. 2016;10(2):185-93
Au	15	24 h	LC50	81.66	0.000414518	hemocytes	other	-3.38246	Katsumiti et al. Nanotoxicology. 2016;10(2):185-93
Au	40	24 h	LC50	83.472	0.000423716	hemocytes	other	-3.37293	Katsumiti et al. Nanotoxicology. 2016;10(2):185-93
Au	-	24 h	EC50	66.4	0.000337056	HeLa cells	Human cells	-3.4723	Kim et al. Bull. Korean Chem. Soc. 2012, Vol. 33, No. 10
Au	-	24 h	EC50	82.9	0.000420812	PC3	Human cells	-3.37591	Kim et al. Bull. Korean Chem. Soc. 2012, Vol. 33, No. 10
Au	15	120 h	LC50	24.61	0.000124924	Danio rerio embryos	Fish	-3.90335	Lacave et al. Nanotechnology 27 (2016) 325102
Au	5	120 h	LC50	24.655	0.000125152	Danio rerio embryos	Fish	-3.90256	Lacave et al. Nanotechnology 27 (2016) 325102
Au	40	120 h	LC50	34.717	0.000176228	Danio rerio embryos	Fish	-3.75392	Lacave et al. Nanotechnology 27 (2016) 325102
Bi2O3	149	24 h	LC50	25	5.36481e-05	A549	Human cells	-4.27045	Abudayyak et al. / Chemosphere 169 (2017) 117e123118
Bi2O3	149	24 h	LC50	25	5.36481e-05	HepG2	Human cells	-4.27045	Abudayyak et al. / Chemosphere 169 (2017) 117e123118
Bi2O3	149	24 h	LC50	75	0.000160944	A549	Human cells	-3.79332	Abudayyak et al. / Chemosphere 169 (2017) 117e123118
Bi2O3	149	24 h	LC50	75	0.000160944	Caco-2	Human cells	-3.79332	Abudayyak et al. / Chemosphere 169 (2017) 117e123118
Bi2O3	149	24 h	LC50	100	0.000214592	Caco-2	Human cells	-3.66839	Abudayyak et al. / Chemosphere 169 (2017) 117e123118
Bi2O3	149	24 h	LC50	100	0.000214592	HepG2	Human cells	-3.66839	Abudayyak et al. / Chemosphere 169 (2017) 117e123118
Bi2O3	149	24 h	LC50	100	0.000214592	NRK-52E	Human cells	-3.66839	Abudayyak et al. / Chemosphere 169 (2017) 117e123118
Bi2O3	149	24 h	LC50	100	0.000214592	NRK-52E	Human cells	-3.66839	Abudayyak et al. / Chemosphere 169 (2017) 117e123118
Bi2O3	164.97	24 h	EC50	337.587	0.000724436	A549 cells	Human cells	-3.14	Cao et al. Green Chem., 2020,22, 3512-3521
Bi2O3	90	24 h	LC50	1459	0.0031309	Hacat cells	Human cells	-2.50433	Gajewicz et al. Nanotoxicology, 2015;9(3):313-25
Bi2O3	<100	48 h	LC50	1600	0.00343348	Danio rerio (adults)	Fish	-2.46427	Kovrižnychet al. Interdisciplinary Toxicology. 2013; Vol. 6(2): 67–73
Bi2O3	<100	48 h	LC50	1600	0.00343348	Danio rerio (eggs)	Fish	-2.46427	Kovrižnychet al. Interdisciplinary Toxicology. 2013; Vol. 6(2): 67–73
Bi2O3	144	30 min	LC50	131.337	0.000281838	E.coli	Bacteria	-3.55	Pathakoti et al. Journal of Photochemistry and Photobiology B: Biology 130 (2014) 234–240
Bi2O3	15-90	2 h	EC50	705.32	0.00151356	E.coli	Bacteria	-2.82	Puzyn et al. Nature Nanotech 6, 175–178 (2011)
CaO	<160	48 h	LC50	260	0.00464286	Danio rerio (adults)	Fish	-2.33321	Kovrižnychet al. Interdisciplinary Toxicology. 2013; Vol. 6(2): 67–73
CaO	<160	48 h	LC50	290	0.00517857	Danio rerio (eggs)	Fish	-2.28579	Kovrižnychet al. Interdisciplinary Toxicology. 2013; Vol. 6(2): 67–73
CeO2	15.38	24 h	EC50	1885.94	0.0109648	A549 cells	Human cells	-1.96	Cao et al. Green Chem., 2020,22, 3512-3521
CeO2	50	10 h	IC50	1000	0.00581395	Saccharomyces cerevisae	Eukaryotes & Microalgae	-2.23553	García-Saucedo et al. / Journal of Hazardous Materials 192 (2011) 1572–1579
CeO2	50	10 h	IC50	1000	0.00581395	Saccharomyces cerevisae	Eukaryotes & Microalgae	-2.23553	García-Saucedo et al. / Journal of Hazardous Materials 192 (2011) 1572–1579
CeO2	50	10 h	EC50	1000	0.00581395	Saccharomyces cerevisae	Eukaryotes & Microalgae	-2.23553	García-Saucedo et al. / Journal of Hazardous Materials 192 (2011) 1572–1579
CeO2	14	24 h	ec50	1000	0.00581395	A549	Human cells	-2.23553	Horie et al. Metallomics, 2012, 4, 350–360
CeO2	14	24 h	ec50	1000	0.00581395	Hacat	Human cells	-2.23553	Horie et al. Metallomics, 2012, 4, 350–360
CeO2	25	2 h	ec50	64.05	0.000372384	E Coli	Bacteria	-3.42901	Kar et al. Chemosphere 264 (2021) 128428
CeO2	18.3	24 h	IC50	>500	#VALUE!	E.coli	Bacteria	#VALUE!	Kaweeteerawat et al. Environ. Sci. Technol. 2015, 49, 1105−1112
CeO2	33.4	24 h	IC50	1058	0.00615116	THP-1	Human cells	-2.21104	Lanone et al. Particle and Fibre Toxicology 2009, 6, 14
CeO2	33.4	24 h	IC50	476.6	0.00277093	THP-1	Human cells	-2.55737	Lanone et al. Particle and Fibre Toxicology 2009, 6, 14
CeO2	5.5	48 h	LC50	1832.5	0.0106541	P. multimicronucleatum	Eukaryotes & Microalgae	-1.97248	Li et al. 2012, Chem. Res. Toxicol, 25, 1675−1681
CeO2	-	24 h	LD 50	1000	0.00581395	A549	Human cells	-2.23553	Lozano et al 2011 J. Phys.: Conf. Ser. 304 012046
CeO2	-	48 h	LD 50	1000	0.00581395	A549	Human cells	-2.23553	Lozano et al 2011 J. Phys.: Conf. Ser. 304 012046
CeO2	-	24 h	LD 50	1000	0.00581395	HeLa cells	Human cells	-2.23553	Lozano et al 2011 J. Phys.: Conf. Ser. 304 012046
CeO2	-	48 h	LD 50	1000	0.00581395	HeLa cells	Human cells	-2.23553	Lozano et al 2011 J. Phys.: Conf. Ser. 304 012046
CeO2	-	24 h	LD 50	1000	0.00581395	NCl H460	Human cells	-2.23553	Lozano et al 2011 J. Phys.: Conf. Ser. 304 012046
CeO2	-	48 h	LD 50	1000	0.00581395	NCl H460	Human cells	-2.23553	Lozano et al 2011 J. Phys.: Conf. Ser. 304 012046
CeO2	-	24 h	LD 50	1000	0.00581395	SK- MES 1	Human cells	-2.23553	Lozano et al 2011 J. Phys.: Conf. Ser. 304 012046
CeO2	-	48 h	LD 50	1000	0.00581395	SK- MES 1	Human cells	-2.23553	Lozano et al 2011 J. Phys.: Conf. Ser. 304 012046
CeO2	7.2	2 h	IC50	1000	0.00581395	Brassica napus	Plant	-2.23553	Ma et al. Chemosphere 2010; 78 (3) 273-279
CeO2	7.2	2 h	IC50	1000	0.00581395	Cucumis sativus	Plant	-2.23553	Ma et al. Chemosphere 2010; 78 (3) 273-279
CeO2	7.2	2 h	IC50	1000	0.00581395	Raphanus sativus	Plants	-2.23553	Ma et al. Chemosphere 2010; 78 (3) 273-279
Co	10.5	48 h	LC50	1.67	2.83051e-05	Ceriodaphnia dubia (neonates)	Crustacean	-4.54814	Griffit et al. Environm. Toxicol. Chem. 2008; 27 (9) 1972–1978
Co	-	24 h	EC50	71.8	0.00121695	HeLa cells	Human cells	-2.91473	Kim et al. Bull. Korean Chem. Soc. 2012, Vol. 33, No. 10
Co	-	24 h	EC50	77.5	0.00131356	PC3	Human cells	-2.88155	Kim et al. Bull. Korean Chem. Soc. 2012, Vol. 33, No. 10
Co	20	24 h	IC50	1.42	2.40678e-05	THP-1	Human cells	-4.61856	Lanone et al. Particle and Fibre Toxicology 2009, 6, 14
Co	20	24 h	IC50	69.6	0.00117966	THP-1	Human cells	-2.92824	Lanone et al. Particle and Fibre Toxicology 2009, 6, 14
Co	20	24 h	IC50	1142	0.0193559	a549	Human cells	-1.71319	Lanone et al. Particle and Fibre Toxicology 2009, 6, 14
Co	20	24 h	IC50	3039	0.0515085	a549	Human cells	-1.28812	Lanone et al. Particle and Fibre Toxicology 2009, 6, 14
Co	20	24 h	IC50	1243	0.0210678	a549	Human cells	-1.67638	Lanone et al. Particle and Fibre Toxicology 2009, 6, 14
Co	20	24 h	IC50	241.6	0.00409492	a549	Human cells	-2.38776	Lanone et al. Particle and Fibre Toxicology 2009, 6, 14
Co	20	24 h	IC50	164.7	0.00279153	THP-1	Human cells	-2.55416	Lanone et al. Particle and Fibre Toxicology 2009, 6, 14
Co	30	96 h	EC50	21.5	0.000364407	Skeletonema costatum	Eukaryotes & Microalgae	-3.43841	X. Chen et al. Environmental Pollution 236 (2018) 454e461
Co	30	96 h	EC50	38.6	0.000654237	Chaetoceros curvisetus	Eukaryotes & Microalgae	-3.18426	X. Chen et al. Environmental Pollution 236 (2018) 454e461
Co2O3	<100	2 h	ec50	77.145	0.000464729	E Coli	Bacteria	-3.3328	Kar et al. Chemosphere 264 (2021) 128428
Co3O4	22.36	24 h	EC50	264.251	0.00109648	A549 cells	Human cells	-2.96	Cao et al. Green Chem., 2020,22, 3512-3521
Co3O4	78.3	30 min	LC50	55.56	0.000230539	Escherichia Coli	Bacteria	-3.63725	Dasari et al. J Environ Sci, 2013;25(5):882-8
Co3O4	9.2	24 h	IC50	123	0.000510373	Caco2	Human cells	-3.29211	Ivansk et al. Curr Top Med Chem., 2015;15(18):1914-29
Co3O4	9.2	24 h	IC50	130.9	0.000543154	A549	Human cells	-3.26508	Ivansk et al. Curr Top Med Chem., 2015;15(18):1914-29
Co3O4	9.2	24 h	IC50	135.5	0.000562241	Balb/c	Mammalian cells	-3.25008	Ivansk et al. Curr Top Med Chem., 2015;15(18):1914-29
Co3O4	51-132	2 h	ec50	240	0.000995851	E Coli	Bacteria	-3.00181	Kar et al. Chemosphere 264 (2021) 128428
Co3O4	10	24 h	IC50	138	0.000572614	E.coli	Bacteria	-3.24214	Kaweeteerawat et al. Environ. Sci. Technol. 2015, 49, 1105−1112
Co3O4	<50	7 days	EC50	8.917	3.7e-05	HaCaT cells	Human cells	-4.4318	Mauro et al. Int. J. Environ. Res. Public Health 2015, 12, 8263-8280
Co3O4	<50	7 days	EC50	31.33	0.00013	HaCaT cells	Human cells	-3.88606	Mauro et al. Int. J. Environ. Res. Public Health 2015, 12, 8263-8280
Co3O4	<50	24 h	EC50	241	0.001	HaCaT cells	Human cells	-3	Mauro et al. Int. J. Environ. Res. Public Health 2015, 12, 8263-8280
Co3O4	<50	48 h	EC50	241	0.001	HaCaT cells	Human cells	-3	Mauro et al. Int. J. Environ. Res. Public Health 2015, 12, 8263-8280
Co3O4	<50	24 h	EC50	241	0.001	HaCaT cells	Human cells	-3	Mauro et al. Int. J. Environ. Res. Public Health 2015, 12, 8263-8280
Co3O4	<50	48 h	EC50	241	0.001	HaCaT cells	Human cells	-3	Mauro et al. Int. J. Environ. Res. Public Health 2015, 12, 8263-8280
Co3O4	13-18	72 h	EC50	38.16	0.00015834	C. minutissima	Eukaryotes & Microalgae	-3.80041	Sharan et al. Aquatic Toxicology 224 (2020) 105498
Co3O4	-	12 h	ec50	105.4	0.000437344	A549	Human cells	-3.35918	Titma et al. Cytotechnology. 2016;68(6):2363-2377
Co3O4	-	108	ec50	107.3	0.000445228	A549	Human cells	-3.35142	Titma et al. Cytotechnology. 2016;68(6):2363-2377
Co3O4	-	36 h	ec50	108.1	0.000448548	A549	Human cells	-3.34819	Titma et al. Cytotechnology. 2016;68(6):2363-2377
Co3O4	-	60 h	ec50	109.8	0.000455602	A549	Human cells	-3.34141	Titma et al. Cytotechnology. 2016;68(6):2363-2377
Co3O4	10--30	3 days	EC50	5000	0.0207469	Cucumis sativus	Plant	-1.68305	Wu et al. J Pet Environ Biotechnol, 2012, 3:126
Co3O4	10--30	3 days	EC50	5000	0.0207469	Lactuca sativa	Plants	-1.68305	Wu et al. J Pet Environ Biotechnol, 2012, 3:126
Co3O4	10--30	3 days	EC50	5000	0.0207469	Raphanus sativus	Plants	-1.68305	Wu et al. J Pet Environ Biotechnol, 2012, 3:126
Co3O4	10	24 h	EC50	22.3872	9.2893e-05	RAW 2647 cells, ATP assay	Mammalian cells	-4.03202	Zhang et al. ACS Nano 2012, 6, 5, 4349–4368
Co3O4	10	24 h	EC50	23.4423	9.72709e-05	BEAS-2B cells, ATP assay	Human cells	-4.01202	Zhang et al. ACS Nano 2012, 6, 5, 4349–4368
Co3O4	10	24 h	EC50	389.045	0.0016143	RAW 2647 cells, MTS assay	Mammalian cells	-2.79202	Zhang et al. ACS Nano 2012, 6, 5, 4349–4368
CoO	<100	24 h	LC50	110	0.00146667	Hacat cells	Human cells	-2.83367	Gajewicz et al. Nanotoxicology, 2015;9(3):313-25
CoO	50	24 h	EC50	12.5	0.000166667	BEAS-2B	Human cells	-3.77815	Huang et al. Materials 2010, 3, 4842-4859;
CoO	75	24 h	EC50	60	0.0008	THP-1 CELLS	Human cells	-3.09691	Jeong et al. Front Pharmacol. 2018 22;9:15.
CoO	75	24 h	EC50	157.5	0.0021	A549 CELLS	Human cells	-2.67778	Jeong et al. Front Pharmacol. 2018 22;9:15.
CoO	71.8	24 h	IC50	43	0.000573333	E.coli	Bacteria	-3.24159	Kaweeteerawat et al. Environ. Sci. Technol. 2015, 49, 1105−1112
CoO	55	30 min	LC50	55.5983	0.00074131	E.coli	Bacteria	-3.13	Pathakoti et al. Journal of Photochemistry and Photobiology B: Biology 130 (2014) 234–240
CoO	15-90	2 h	EC50	23.1772	0.00030903	E.coli	Bacteria	-3.51	Puzyn et al. Nature Nanotech 6, 175–178 (2011)
CoO	71.8	24 h	EC50	43.6516	0.000582021	BEAS-2B cells, ATP assay	Human cells	-3.23506	Zhang et al. ACS Nano 2012, 6, 5, 4349–4368
CoO	71.8	24 h	EC50	47.863	0.000638173	RAW 2647 cells, ATP assay	Mammalian cells	-3.19506	Zhang et al. ACS Nano 2012, 6, 5, 4349–4368
CoO	71.8	24 h	EC50	51.2861	0.000683815	BEAS-2B cells, MTS assay	Human cells	-3.16506	Zhang et al. ACS Nano 2012, 6, 5, 4349–4368
CoO	71.8	24 h	EC50	63.0957	0.000841276	RAW 2647 cells, MTS assay	Mammalian cells	-3.07506	Zhang et al. ACS Nano 2012, 6, 5, 4349–4368
Cr2O3	61.38	24 h	EC50	115.304	0.000758578	A549 cells	Human cells	-3.12	Cao et al. Green Chem., 2020,22, 3512-3521
Cr2O3	60	24 h	LC50	455	0.00299342	Hacat cells	Human cells	-2.52383	Gajewicz et al. Nanotoxicology, 2015;9(3):313-25
Cr2o3	-	12 h	EC50	50	0.00131579	Neuro 2A cells	Mammalian cells	-2.88081	Jeng et al. ron Sci Health A Tox Hazard Subst Environ Eng. 2006;41(12):2699-711
Cr2O3	193	24 h	IC50	232	0.00152632	E.coli	Bacteria	-2.81636	Kaweeteerawat et al. Environ. Sci. Technol. 2015, 49, 1105−1112
Cr2O3		48 h	LC50	1600	0.0105263	Danio rerio (adults)	Fish	-1.97772	Kovrižnychet al. Interdisciplinary Toxicology. 2013; Vol. 6(2): 67–73
Cr2O3		48 h	LC50	1600	0.0105263	Danio rerio (eggs)	Fish	-1.97772	Kovrižnychet al. Interdisciplinary Toxicology. 2013; Vol. 6(2): 67–73
Cr2O3	47	30 min	LC50	1323.86	0.00870964	E.coli	Bacteria	-2.06	Pathakoti et al. Journal of Photochemistry and Photobiology B: Biology 130 (2014) 234–240
Cr2O3	15-90	2 h	EC50	469.725	0.0030903	E.coli	Bacteria	-2.51	Puzyn et al. Nature Nanotech 6, 175–178 (2011)
Cr2O3	193	24 h	EC50	11.749	7.72959e-05	RAW 2647 cells, ATP assay	Mammalian cells	-4.11184	Zhang et al. ACS Nano 2012, 6, 5, 4349–4368
Cr2O3	193	24 h	EC50	35.4813	0.00023343	BEAS-2B cells, ATP assay	Human cells	-3.63184	Zhang et al. ACS Nano 2012, 6, 5, 4349–4368
Cr2O3	193	24 h	EC50	338.844	0.00222924	BEAS-2B cells, MTS assay	Human cells	-2.65184	Zhang et al. ACS Nano 2012, 6, 5, 4349–4368
Cr2O3	193	24 h	EC50	467.735	0.0030772	RAW 2647 cells, MTS assay	Mammalian cells	-2.51184	Zhang et al. ACS Nano 2012, 6, 5, 4349–4368
Cu	26.7	48 h	LC50	0.06	9.375e-07	Daphnia pulex (adults)	Crustacean	-6.02803	Griffit et al. Environm. Toxicol. Chem. 2008; 27 (9) 1972–1978
Cu	26.7	48 h	LC50	0.419	6.54687e-06	Ceriodaphnia dubia (neonates)	Crustacean	-5.18397	Griffit et al. Environm. Toxicol. Chem. 2008; 27 (9) 1972–1978
Cu	26.7	48 h	LC50	0.71	1.10937e-05	Danio rerio (juvenile)	Fish	-4.95492	Griffit et al. Environm. Toxicol. Chem. 2008; 27 (9) 1972–1978
Cu	26.7	48 h	LC50	0.94	1.46875e-05	Danio rerio (adults)	Fish	-4.83305	Griffit et al. Environm. Toxicol. Chem. 2008; 27 (9) 1972–1978
Cu	-	24 h	EC50	85.5	0.00133594	HeLa cells	Human cells	-2.87421	Kim et al. Bull. Korean Chem. Soc. 2012, Vol. 33, No. 10
Cu	-	24 h	EC50	91.7	0.00143281	PC3	Human cells	-2.84381	Kim et al. Bull. Korean Chem. Soc. 2012, Vol. 33, No. 10
Cu	<100	48 h	LC50	4.2	6.5625e-05	Danio rerio (adults)	Fish	-4.18293	Kovrižnychet al. Interdisciplinary Toxicology. 2013; Vol. 6(2): 67–73
Cu	<100	48 h	LC50	24	0.000375	Danio rerio (eggs)	Fish	-3.42597	Kovrižnychet al. Interdisciplinary Toxicology. 2013; Vol. 6(2): 67–73
Cu	22.9	24 h	IC50	1.65	2.57812e-05	THP-1	Human cells	-4.5887	Lanone et al. Particle and Fibre Toxicology 2009, 6, 14
Cu	90	24 h	IC50	5.29	8.26563e-05	THP-1	Human cells	-4.08272	Lanone et al. Particle and Fibre Toxicology 2009, 6, 14
Cu	22.9	24 h	IC50	6.46	0.000100937	THP-1	Human cells	-3.99595	Lanone et al. Particle and Fibre Toxicology 2009, 6, 14
Cu	90	24 h	IC50	6.59	0.000102969	THP-1	Human cells	-3.98729	Lanone et al. Particle and Fibre Toxicology 2009, 6, 14
Cu	22.9	24 h	IC50	13.49	0.000210781	a549	Human cells	-3.67617	Lanone et al. Particle and Fibre Toxicology 2009, 6, 14
Cu	22.9	24 h	IC50	17.04	0.00026625	a549	Human cells	-3.57471	Lanone et al. Particle and Fibre Toxicology 2009, 6, 14
Cu	90	24 h	IC50	33.74	0.000527187	a549	Human cells	-3.27803	Lanone et al. Particle and Fibre Toxicology 2009, 6, 14
Cu	90	24 h	IC50	48.13	0.000752031	a549	Human cells	-3.12376	Lanone et al. Particle and Fibre Toxicology 2009, 6, 14
Cu	90	24 h	IC50	74.95	0.00117109	a549	Human cells	-2.93141	Lanone et al. Particle and Fibre Toxicology 2009, 6, 14
Cu	90	24 h	IC50	31.27	0.000488594	a549	Human cells	-3.31105	Lanone et al. Particle and Fibre Toxicology 2009, 6, 14
Cu	22.9	24 h	IC50	1698	0.0265312	a549	Human cells	-1.57624	Lanone et al. Particle and Fibre Toxicology 2009, 6, 14
Cu	22.9	24 h	IC50	70.79	0.00110609	a549	Human cells	-2.95621	Lanone et al. Particle and Fibre Toxicology 2009, 6, 14
Cu	90	24 h	IC50	0.39	6.09375e-06	THP-1	Human cells	-5.21512	Lanone et al. Particle and Fibre Toxicology 2009, 6, 14
Cu	90	24 h	IC50	5.7	8.90625e-05	THP-1	Human cells	-4.05031	Lanone et al. Particle and Fibre Toxicology 2009, 6, 14
Cu	22.9	24 h	IC50	13.15	0.000205469	THP-1	Human cells	-3.68725	Lanone et al. Particle and Fibre Toxicology 2009, 6, 14
Cu	22.9	24 h	IC50	114.7	0.00179219	THP-1	Human cells	-2.74662	Lanone et al. Particle and Fibre Toxicology 2009, 6, 14
Cu	25	96 h	EC50	0.3	4.6875e-06	Soil bacterial community	Bacteria	-5.32906	Y. Zhai et al. Ecotoxicology and Environmental Safety 145 (2017) 349–358
Cu	50	96 h	EC50	0.38	5.9375e-06	Soil bacterial community	Bacteria	-5.2264	Y. Zhai et al. Ecotoxicology and Environmental Safety 145 (2017) 349–358
Cu	78	96 h	EC50	0.57	8.90625e-06	Soil bacterial community	Bacteria	-5.05031	Y. Zhai et al. Ecotoxicology and Environmental Safety 145 (2017) 349–358
Cu	100	96 h	EC50	0.54	8.4375e-06	Soil bacterial community	Bacteria	-5.07379	Y. Zhai et al. Ecotoxicology and Environmental Safety 145 (2017) 349–358
Cu	40	15 min	EC50	4.1	6.40625e-05	Vibrio Fischeri	Bacteria	-4.1934	Zhang et al. Environ Monit Assess (2020) 192: 484
Cu2O	83-94	24 h	IC50	3.42	2.39161e-05	THP-1	Human cells	-4.62131	Lanone et al. Particle and Fibre Toxicology 2009, 6, 14
Cu2O	83-94	24 h	IC50	11.53	8.06294e-05	THP-1	Human cells	-4.09351	Lanone et al. Particle and Fibre Toxicology 2009, 6, 14
Cu2O	83-94	24 h	IC50	45	0.000314685	a549	Human cells	-3.50212	Lanone et al. Particle and Fibre Toxicology 2009, 6, 14
Cu2O	83-94	24 h	IC50	52.52	0.000367273	a549	Human cells	-3.43501	Lanone et al. Particle and Fibre Toxicology 2009, 6, 14
Cu2O	83-94	24 h	IC50	39.96	0.000279441	a549	Human cells	-3.55371	Lanone et al. Particle and Fibre Toxicology 2009, 6, 14
Cu2O	83-94	24 h	IC50	164.7	0.00115175	a549	Human cells	-2.93864	Lanone et al. Particle and Fibre Toxicology 2009, 6, 14
Cu2O	83-94	24 h	IC50	2.93	2.04895e-05	THP-1	Human cells	-4.68847	Lanone et al. Particle and Fibre Toxicology 2009, 6, 14
Cu2O	83-94	24 h	IC50	8.15	5.6993e-05	THP-1	Human cells	-4.24418	Lanone et al. Particle and Fibre Toxicology 2009, 6, 14
CuO	50.24	24 h	ec50 (in SFM medium)	5	6.25e-05	A549 cells	Human cells	-4.20412	Areecheewakul, et al. NanoImpact 18 (2020) 100214
CuO	50.24	24 h	ec50 (in SFM medium)	75	0.0009375	A549 cells	Human cells	-3.02803	Areecheewakul, et al. NanoImpact 18 (2020) 100214
CuO	50.24	24 h	ec50 (in SCM medium)	7.5	9.375e-05	A549 cells	Human cells	-4.02803	Areecheewakul, et al. NanoImpact 18 (2020) 100214
CuO	50.24	24 h	ec50 (in SCM medium)	50	0.000625	A549 cells	Human cells	-3.20412	Areecheewakul, et al. NanoImpact 18 (2020) 100214
CuO	13.1	30 min	EC50	1.78	2.225e-05	Vibrio Fischeri	Bacteria	-4.65267	Aruoja et al Environ. Sci.: Nano, 2015,2, 630-644
CuO	13.1	24 h	EC50	2	2.5e-05	Tetrahymena thermophila	Eukaryotes & Microalgae	-4.60206	Aruoja et al Environ. Sci.: Nano, 2015,2, 630-644
CuO	30	24 h	LC50	90.3	0.00113521	Thamnocephalus platyurus	Crustacean	-2.94493	Blinova et al. / Environmental Pollution 158 (2010) 41–4744
CuO	30	24 h	LC50	92.7	0.00116538	Thamnocephalus platyurus	Crustacean	-2.93353	Blinova et al. / Environmental Pollution 158 (2010) 41–4744
CuO	30	24 h	LC50	112	0.00140801	Thamnocephalus platyurus	Crustacean	-2.85139	Blinova et al. / Environmental Pollution 158 (2010) 41–4744
CuO	30	24 h	LC50	129	0.00162172	Thamnocephalus platyurus	Crustacean	-2.79002	Blinova et al. / Environmental Pollution 158 (2010) 41–4744
CuO	30	24 h	LC50	152	0.00191087	Thamnocephalus platyurus	Crustacean	-2.71877	Blinova et al. / Environmental Pollution 158 (2010) 41–4744
CuO	30	24 h	LC50	217	0.00272802	Thamnocephalus platyurus	Crustacean	-2.56415	Blinova et al. / Environmental Pollution 158 (2010) 41–4744
CuO	30	48 h	EC50	92.7	0.00116538	daphnia magna	Crustacean	-2.93353	Blinova et al. / Environmental Pollution 158 (2010) 41–4744
CuO	30	48 h	EC50	149	0.00187315	daphnia magna	Crustacean	-2.72743	Blinova et al. / Environmental Pollution 158 (2010) 41–4744
CuO	30	48 h	EC50	160	0.00201144	daphnia magna	Crustacean	-2.69649	Blinova et al. / Environmental Pollution 158 (2010) 41–4744
CuO	30	48 h	EC50	200	0.0025143	daphnia magna	Crustacean	-2.59958	Blinova et al. / Environmental Pollution 158 (2010) 41–4744
CuO	30	48 h	EC50	224	0.00281602	daphnia magna	Crustacean	-2.55036	Blinova et al. / Environmental Pollution 158 (2010) 41–4744
CuO	24.5	24 h	ec50	0.7	8.80005e-06	murine Fibroblasts BALB/c 3t3	Mammalian cells	-5.05551	Bondarenko et al. Nanotoxicology, 2016; 10(9): 1229–1242
CuO	24.5	48 h	ec50	0.9	1.13144e-05	Daphnia magna	Crustacean	-4.94637	Bondarenko et al. Nanotoxicology, 2016; 10(9): 1229–1242
CuO	24.5	48 h	ec50	1	1.25715e-05	murine Fibroblasts (membrane integrity)	Mammalian cells	-4.90061	Bondarenko et al. Nanotoxicology, 2016; 10(9): 1229–1242
CuO	24.5	96 h	ec50	1.6	2.01144e-05	zebrafish (danio rerio)	Fish	-4.69649	Bondarenko et al. Nanotoxicology, 2016; 10(9): 1229–1242
CuO	24.5	24 h	ec50	2.2	2.76573e-05	human mesenchymal stem cells	Human cells	-4.55819	Bondarenko et al. Nanotoxicology, 2016; 10(9): 1229–1242
CuO	24.5	30 min	ec50	3.4	4.27431e-05	Vibrio fischeri	Bacteria	-4.36913	Bondarenko et al. Nanotoxicology, 2016; 10(9): 1229–1242
CuO	28	30 min	LC50	4.63	5.8206e-05	Escherichia Coli	Bacteria	-4.23503	Dasari et al. J Environ Sci, 2013;25(5):882-8
CuO	25	24 h	ec50	5.95	7.48004e-05	RTgutGC	Fish	-4.1261	Geppert et al. Environ. Sci.: Nano, 2021,8, 2249-2260
CuO	30	24 h	LC50	2.1	2.625e-05	Thamnocephalus platyurus	Crustacean	-4.58087	Heinlaan et al. Chemosphere 2008; 71 (7) 1308-1316
CuO	30	48 h	LC50	3.2	4e-05	Daphnia magna (neonates)	Crustacean	-4.39794	Heinlaan et al. Chemosphere 2008; 71 (7) 1308-1316
CuO	30	30 min	EC50	79	0.0009875	Vibrio fischeri	Bacteria	-3.00546	Heinlaan et al. Chemosphere 2008; 71 (7) 1308-1316
CuO	48	24 h	ec50	100	0.00125715	A549	Human cells	-2.90061	Horie et al. Metallomics, 2012, 4, 350–360
CuO	48	24 h	ec50	100	0.00125715	Hacat	Human cells	-2.90061	Horie et al. Metallomics, 2012, 4, 350–360
CuO	30-40	2 h	LD50	64.5	0.00080625	E.coli	Bacteria	-3.09353	Hu et al. Sci. Total Environ. 407 (2009) 3070–3072
CuO	30-50	24 h	EC50	5	6.28575e-05	BEAS-2B	Human cells	-4.20164	Huang et al. Materials 2010, 3, 4842-4859;
CuO	30	2 h	ec50	2.53	3.18059e-05	E. coli AS391	Bacteria	-4.49749	Ivansk et al Anal Bioanal Chem (2010) 398:701–716
CuO	30	2 h	ec50	3.25	4.08574e-05	E. coli JI132	Bacteria	-4.38873	Ivansk et al Anal Bioanal Chem (2010) 398:701–716
CuO	30	2 h	ec50	6.73	8.46062e-05	E. coli JI130	Bacteria	-4.0726	Ivansk et al Anal Bioanal Chem (2010) 398:701–716
CuO	30	2 h	ec50	7.45	9.36577e-05	E. coli JI131	Bacteria	-4.02846	Ivansk et al Anal Bioanal Chem (2010) 398:701–716
CuO	30	2 h	ec50	9.85	0.000123829	E. coli AS393	Bacteria	-3.90718	Ivansk et al Anal Bioanal Chem (2010) 398:701–716
CuO	30	2 h	ec50	10.1	0.000126972	E. coli AB1157	Bacteria	-3.89629	Ivansk et al Anal Bioanal Chem (2010) 398:701–716
CuO	30	30 min	ec50	11.4	0.000143315	E. coli AS391	Bacteria	-3.84371	Ivansk et al Anal Bioanal Chem (2010) 398:701–716
CuO	30	30 min	ec50	14.8	0.000186058	E. coli JI132	Bacteria	-3.73035	Ivansk et al Anal Bioanal Chem (2010) 398:701–716
CuO	30	30 min	ec50	33	0.00041486	E. coli JI131	Bacteria	-3.3821	Ivansk et al Anal Bioanal Chem (2010) 398:701–716
CuO	30	30 min	ec50	39.7	0.000499089	E. coli JI130	Bacteria	-3.30182	Ivansk et al Anal Bioanal Chem (2010) 398:701–716
CuO	30	30 min	ec50	47.6	0.000598403	E. coli AS393	Bacteria	-3.22301	Ivansk et al Anal Bioanal Chem (2010) 398:701–716
CuO	30	30 min	ec50	50.5	0.000634861	E. coli AB1157	Bacteria	-3.19732	Ivansk et al Anal Bioanal Chem (2010) 398:701–716
CuO	11.9	24 h	IC50	12.6	0.000158401	Caco2	Human cells	-3.80024	Ivansk et al. Curr Top Med Chem., 2015;15(18):1914-29
CuO	11.9	24 h	IC50	17.7	0.000222516	Balb/c	Mammalian cells	-3.65264	Ivansk et al. Curr Top Med Chem., 2015;15(18):1914-29
CuO	11.9	24 h	IC50	18.9	0.000237601	A549	Human cells	-3.62415	Ivansk et al. Curr Top Med Chem., 2015;15(18):1914-29
CuO	28.5	24 h	EC50	14.4	0.00018	THP-1 CELLS	Human cells	-3.74473	Jeong et al. Front Pharmacol. 2018 22;9:15.
CuO	28.5	24 h	EC50	160	0.002	A549 CELLS	Human cells	-2.69897	Jeong et al. Front Pharmacol. 2018 22;9:15.
CuO	42	18 h	EC50	20	0.00025143	A549	Human cells	-3.59958	Karlsson et al. Chem. Res. Toxicol. 2008, Vol. 21, No. 9
CuO	30	24 h	EC50	13.4	0.0001675	Saccharomyces cerevisiae S288C	Eukaryotes & Microalgae	-3.77599	Kasemets et al. Toxicol. In Vitro 2009; 23 (6) 1116-1122
CuO	30	8 h	EC50	20.7	0.00025875	Saccharomyces cerevisiae S288C	Eukaryotes & Microalgae	-3.58712	Kasemets et al. Toxicol. In Vitro 2009; 23 (6) 1116-1122
CuO	12.8	24 h	IC50	39	0.000490289	E.coli	Bacteria	-3.30955	Kaweeteerawat et al. Environ. Sci. Technol. 2015, 49, 1105−1112
CuO	30-50	3 days	EC50	0.46	5.78289e-06	Lactuca sativa L.	Plants	-5.23786	Ko et al. Appl Microbiol Biotechnol (2014) 98:3295–3303
CuO	30-50	3 days	EC50	26.84	0.000337419	Raphanus sativus L	Plants	-3.47183	Ko et al. Appl Microbiol Biotechnol (2014) 98:3295–3303
CuO	30-50	1.5 h	EC50	54.01	0.000678987	E.coli	Bacteria	-3.16814	Ko et al. Appl Microbiol Biotechnol (2014) 98:3295–3303
CuO	30-50	4 days	EC50	0.25	3.125e-06	Lactuca sativa L.	Plants	-5.50515	Kong et al. Nanomaterials 2021, 11, 1653
CuO	30-50	4 days	EC50	0.35	4.375e-06	Raphanus sativus	Plants	-5.35902	Kong et al. Nanomaterials 2021, 11, 1653
CuO	30-50	4 days	EC50	1.28	1.6e-05	Lactuca sativa L.	Plants	-4.79588	Kong et al. Nanomaterials 2021, 11, 1653
CuO	<50	48 h	LC50	12.5	0.000157144	Danio rerio (adults)	Fish	-3.8037	Kovrižnychet al. Interdisciplinary Toxicology. 2013; Vol. 6(2): 67–73
CuO	<50	48 h	LC50	960	0.0120686	Danio rerio (eggs)	Fish	-1.91834	Kovrižnychet al. Interdisciplinary Toxicology. 2013; Vol. 6(2): 67–73
CuO	30	24 h	IC50	3	3.77145e-05	THP-1	Human cells	-4.42349	Lanone et al. Particle and Fibre Toxicology 2009, 6, 14
CuO	45.4	24 h	IC50	3.89	4.89031e-05	THP-1	Human cells	-4.31066	Lanone et al. Particle and Fibre Toxicology 2009, 6, 14
CuO	30	24 h	IC50	7.3	9.1772e-05	THP-1	Human cells	-4.03729	Lanone et al. Particle and Fibre Toxicology 2009, 6, 14
CuO	30	24 h	IC50	10.07	0.000126595	a549	Human cells	-3.89758	Lanone et al. Particle and Fibre Toxicology 2009, 6, 14
CuO	30	24 h	IC50	10.82	0.000136024	a549	Human cells	-3.86639	Lanone et al. Particle and Fibre Toxicology 2009, 6, 14
CuO	45.4	24 h	IC50	31.07	0.000390597	THP-1	Human cells	-3.40827	Lanone et al. Particle and Fibre Toxicology 2009, 6, 14
CuO	45.4	24 h	IC50	35.61	0.000447671	a549	Human cells	-3.34904	Lanone et al. Particle and Fibre Toxicology 2009, 6, 14
CuO	45.4	24 h	IC50	47.41	0.000596015	a549	Human cells	-3.22474	Lanone et al. Particle and Fibre Toxicology 2009, 6, 14
CuO	45.4	24 h	IC50	832.7	0.0104683	a549	Human cells	-1.98012	Lanone et al. Particle and Fibre Toxicology 2009, 6, 14
CuO	45.4	24 h	IC50	102.5	0.00128858	a549	Human cells	-2.88989	Lanone et al. Particle and Fibre Toxicology 2009, 6, 14
CuO	30	24 h	IC50	11.44	0.000143818	a549	Human cells	-3.84219	Lanone et al. Particle and Fibre Toxicology 2009, 6, 14
CuO	30	24 h	IC50	20.84	0.00026199	a549	Human cells	-3.58172	Lanone et al. Particle and Fibre Toxicology 2009, 6, 14
CuO	30	24 h	IC50	4.98	6.26061e-05	THP-1	Human cells	-4.20338	Lanone et al. Particle and Fibre Toxicology 2009, 6, 14
CuO	45.4	24 h	IC50	12.38	0.000155635	THP-1	Human cells	-3.80789	Lanone et al. Particle and Fibre Toxicology 2009, 6, 14
CuO	30	24 h	IC50	17.88	0.000224778	THP-1	Human cells	-3.64825	Lanone et al. Particle and Fibre Toxicology 2009, 6, 14
CuO	13.3	48 h	LC50	0.98	1.23201e-05	P. multimicronucleatum	Eukaryotes & Microalgae	-4.90939	Li et al. 2012, Chem. Res. Toxicol, 25, 1675−1681
CuO	30	30 min	ec50	68.1	0.000856119	Vibrio fischieri	Bacteria	-3.06747	Mortimer et al. Toxicology in Vitro 22 (2008) 1412–1417
CuO	28	30 min	LC50	4.57734	5.7544e-05	E.coli	Bacteria	-4.24	Pathakoti et al. Journal of Photochemistry and Photobiology B: Biology 130 (2014) 234–240
CuO	15-90	2 h	EC50	50.1895	0.000630957	E.coli	Bacteria	-3.2	Puzyn et al. Nature Nanotech 6, 175–178 (2011)
CuO	>50	24 h	IC50	30	0.000377145	A549	Human cells	-3.42349	Seiffert et al., 2012,Chem. Res. Toxicol., 25, 140–152
CuO	>50	24 h	IC50	30	0.000377145	A549	Human cells	-3.42349	Seiffert et al., 2012,Chem. Res. Toxicol., 25, 140–152
CuO	>50	24 h	IC50	30	0.000377145	A549	Human cells	-3.42349	Seiffert et al., 2012,Chem. Res. Toxicol., 25, 140–152
CuO	>50	24 h	IC50	30	0.000377145	A549	Human cells	-3.42349	Seiffert et al., 2012,Chem. Res. Toxicol., 25, 140–152
CuO	>50	24 h	IC50	30	0.000377145	A549	Human cells	-3.42349	Seiffert et al., 2012,Chem. Res. Toxicol., 25, 140–152
CuO	<50	48 h	EC50	5.903	7.42096e-05	Daphnia magna	Crustacean	-4.12954	Sovova et al., 2009, Proceedings,NANOCON Conference, Roznov , Czech Republic, pp 62‐71,
CuO	<50	30 min	EC50	12.2	0.000153372	Vibrio fischeri	Bacteria	-3.81425	Sovova et al., 2009, Proceedings,NANOCON Conference, Roznov , Czech Republic, pp 62‐71,
CuO	-	24 h	ec50	11	0.000138287	Balb/c 3T3	Mammalian cells	-3.85922	Titma et al. Cytotechnology. 2016;68(6):2363-2377
CuO	-	60 h	ec50	30.3	0.000380916	Caco2	Human cells	-3.41917	Titma et al. Cytotechnology. 2016;68(6):2363-2377
CuO	-	108	ec50	31.5	0.000396002	Caco2	Human cells	-3.4023	Titma et al. Cytotechnology. 2016;68(6):2363-2377
CuO	-	36 h	ec50	32.1	0.000403545	A549	Human cells	-3.39411	Titma et al. Cytotechnology. 2016;68(6):2363-2377
CuO	-	108	ec50	36.2	0.000455088	A549	Human cells	-3.3419	Titma et al. Cytotechnology. 2016;68(6):2363-2377
CuO	-	216	ec50	37	0.000465146	Caco2	Human cells	-3.33241	Titma et al. Cytotechnology. 2016;68(6):2363-2377
CuO	-	216	ec50	37.2	0.00046766	A549	Human cells	-3.33007	Titma et al. Cytotechnology. 2016;68(6):2363-2377
CuO	-	60 h	ec50	37.4	0.000470174	A549	Human cells	-3.32774	Titma et al. Cytotechnology. 2016;68(6):2363-2377
CuO	-	12 h	ec50	38.2	0.000480231	A549	Human cells	-3.31855	Titma et al. Cytotechnology. 2016;68(6):2363-2377
CuO	-	36 h	ec50	38.6	0.00048526	Caco2	Human cells	-3.31403	Titma et al. Cytotechnology. 2016;68(6):2363-2377
CuO	-	24 h	ec50	43.8	0.000550632	A549	Human cells	-3.25914	Titma et al. Cytotechnology. 2016;68(6):2363-2377
CuO	-	24 h	ec50	117.2	0.00147338	Caco2	Human cells	-2.83169	Titma et al. Cytotechnology. 2016;68(6):2363-2377
CuO	30-50	3 days	EC50	12.9	0.000162172	Lactuca sativa	Plants	-3.79002	Wu et al. J Pet Environ Biotechnol, 2012, 3:126
CuO	30-50	3 days	EC50	175.4	0.00220504	Cucumis sativus	Plant	-2.65658	Wu et al. J Pet Environ Biotechnol, 2012, 3:126
CuO	30-50	3 days	EC50	297	0.00373374	Raphanus sativus	Plants	-2.42786	Wu et al. J Pet Environ Biotechnol, 2012, 3:126
CuO	12.8	24 h	EC50	13.1826	0.000165725	RAW 2647 cells, MTS assay	Mammalian cells	-3.78061	Zhang et al. ACS Nano 2012, 6, 5, 4349–4368
CuO	12.8	24 h	EC50	14.4544	0.000181713	RAW 2647 cells, ATP assay	Mammalian cells	-3.74061	Zhang et al. ACS Nano 2012, 6, 5, 4349–4368
CuO	12.8	24 h	EC50	23.9883	0.000301569	BEAS-2B cells, ATP assay	Human cells	-3.52061	Zhang et al. ACS Nano 2012, 6, 5, 4349–4368
CuO	12.8	24 h	EC50	23.9883	0.000301569	BEAS-2B cells, MTS assay	Human cells	-3.52061	Zhang et al. ACS Nano 2012, 6, 5, 4349–4368
CuO	40	15 min	EC50	118.7	0.00149224	Vibrio Fischeri	Bacteria	-2.82616	Zhang et al. Environ Monit Assess (2020) 192: 484
CuO	20	48 h	EC50	1.07	1.3375e-05	Saccharomyces cerevisae	Eukaryotes & Microalgae	-4.87371	Zhang et al., J Nanopart Res (2016) 18 (2), 372
CuO	20	6 h	EC50	11.38	0.00014225	Saccharomyces cerevisae	Eukaryotes & Microalgae	-3.84695	Zhang et al., J Nanopart Res (2016) 18 (2), 372
Er2O3	40-50	2 h	ec50	0.033	8.62745e-08	E Coli	Bacteria	-7.06412	Kar et al. Chemosphere 264 (2021) 128428
Fe2O3	20-40	10 h	IC50	1000	0.00625	Saccharomyces cerevisae	Eukaryotes & Microalgae	-2.20412	Otero-González et al. / Chemosphere 93 (2013) 1201–1206
Fe2O3	20-40	10 h	IC50	1000	0.00625	Saccharomyces cerevisae	Eukaryotes & Microalgae	-2.20412	Otero-González et al. / Chemosphere 93 (2013) 1201–1206
Fe2O3	20-40	10 h	EC50	1000	0.00625	Saccharomyces cerevisae	Eukaryotes & Microalgae	-2.20412	Otero-González et al. / Chemosphere 93 (2013) 1201–1206
Fe2O3	20.93	24 h	EC50	651.808	0.0040738	A549 cells	Human cells	-2.39	Cao et al. Green Chem., 2020,22, 3512-3521
Fe2O3	100	48 h	IC50	464	0.0029	HEK293	Human cells	-2.5376	Dua et al., 2011,Bull. Korean Chem. Soc. Vol. 32, No. 6 2051
Fe2O3	100	24 h	IC50	698	0.0043625	HEK293	Human cells	-2.36026	Dua et al., 2011,Bull. Korean Chem. Soc. Vol. 32, No. 6 2051
Fe2O3	32	24 h	LC50	1483	0.00926875	Hacat cells	Human cells	-2.03298	Gajewicz et al. Nanotoxicology, 2015;9(3):313-25
Fe2O3	39	24 h	ec50	1000	0.00625	A549	Human cells	-2.20412	Horie et al. Metallomics, 2012, 4, 350–360
Fe2O3	39	24 h	ec50	1000	0.00625	Hacat	Human cells	-2.20412	Horie et al. Metallomics, 2012, 4, 350–360
Fe2O3	30-40	2 h	LD50	638.3	0.00398937	E.coli	Bacteria	-2.3991	Hu et al. Sci. Total Environ. 407 (2009) 3070–3072
Fe2O3	12.3	24 h	IC50	>500	#VALUE!	E.coli	Bacteria	#VALUE!	Kaweeteerawat et al. Environ. Sci. Technol. 2015, 49, 1105−1112
Fe2O3	20-40	1.5 h	EC50	1000	0.00625	E.coli	Bacteria	-2.20412	Ko et al. Appl Microbiol Biotechnol (2014) 98:3295–3303
Fe2O3	20-40	3 days	EC50	1000	0.00625	Lactuca sativa L.	Plants	-2.20412	Ko et al. Appl Microbiol Biotechnol (2014) 98:3295–3303
Fe2O3	20-40	3 days	EC50	1000	0.00625	Raphanus sativus L	Plants	-2.20412	Ko et al. Appl Microbiol Biotechnol (2014) 98:3295–3303
Fe2O3	<50	48 h	LC50	1600	0.01	Danio rerio (adults)	Fish	-2	Kovrižnychet al. Interdisciplinary Toxicology. 2013; Vol. 6(2): 67–73
Fe2O3	<50	48 h	LC50	1600	0.01	Danio rerio (eggs)	Fish	-2	Kovrižnychet al. Interdisciplinary Toxicology. 2013; Vol. 6(2): 67–73
Fe2O3	4.7	48 h	LC50	0.81	5.0625e-06	P. multimicronucleatum	Eukaryotes & Microalgae	-5.29563	Li et al. 2012, Chem. Res. Toxicol, 25, 1675−1681
Fe2O3	-	24 h	LD 50	1000	0.00625	A549	Human cells	-2.20412	Lozano et al 2011 J. Phys.: Conf. Ser. 304 012046
Fe2O3	-	48 h	LD 50	1000	0.00625	A549	Human cells	-2.20412	Lozano et al 2011 J. Phys.: Conf. Ser. 304 012046
Fe2O3	-	24 h	LD 50	1000	0.00625	HeLa cells	Human cells	-2.20412	Lozano et al 2011 J. Phys.: Conf. Ser. 304 012046
Fe2O3	-	48 h	LD 50	1000	0.00625	HeLa cells	Human cells	-2.20412	Lozano et al 2011 J. Phys.: Conf. Ser. 304 012046
Fe2O3	-	24 h	LD 50	1000	0.00625	NCl H460	Human cells	-2.20412	Lozano et al 2011 J. Phys.: Conf. Ser. 304 012046
Fe2O3	-	48 h	LD 50	1000	0.00625	NCl H460	Human cells	-2.20412	Lozano et al 2011 J. Phys.: Conf. Ser. 304 012046
Fe2O3	-	24 h	LD 50	1000	0.00625	SK- MES 1	Human cells	-2.20412	Lozano et al 2011 J. Phys.: Conf. Ser. 304 012046
Fe2O3	-	48 h	LD 50	1000	0.00625	SK- MES 1	Human cells	-2.20412	Lozano et al 2011 J. Phys.: Conf. Ser. 304 012046
Fe2O3	68	30 min	LC50	636.971	0.00398107	E.coli	Bacteria	-2.4	Pathakoti et al. Journal of Photochemistry and Photobiology B: Biology 130 (2014) 234–240
Fe2O3	15-90	2 h	EC50	820.578	0.00512861	E.coli	Bacteria	-2.29	Puzyn et al. Nature Nanotech 6, 175–178 (2011)
Fe2O3	20-40	3 days	EC50	1682	0.0105125	Cucumis sativus	Plant	-1.97829	Wu et al. J Pet Environ Biotechnol, 2012, 3:126
Fe2O3	20-40	3 days	EC50	5000	0.03125	Lactuca sativa	Plants	-1.50515	Wu et al. J Pet Environ Biotechnol, 2012, 3:126
Fe2O3	20-40	3 days	EC50	5000	0.03125	Raphanus sativus	Plants	-1.50515	Wu et al. J Pet Environ Biotechnol, 2012, 3:126
Fe2O3	12.3	24 h	EC50	>200	#VALUE!	BEAS-2B cells, ATP assay	Human cells	#VALUE!	Zhang et al. ACS Nano 2012, 6, 5, 4349–4368
Fe2O3	12.3	24 h	EC50	>200	#VALUE!	BEAS-2B cells, MTS assay	Human cells	#VALUE!	Zhang et al. ACS Nano 2012, 6, 5, 4349–4368
Fe2O3	12.3	24 h	EC50	>200	#VALUE!	RAW 2647 cells, ATP assay	Mammalian cells	#VALUE!	Zhang et al. ACS Nano 2012, 6, 5, 4349–4368
Fe2O3	12.3	24 h	EC50	>200	#VALUE!	RAW 2647 cells, MTS assay	Mammalian cells	#VALUE!	Zhang et al. ACS Nano 2012, 6, 5, 4349–4368
Fe3O4	9.7	24 h	EC50	26.03	0.000112198	Tetrahymena thermophila	Eukaryotes & Microalgae	-3.95001	Aruoja et al Environ. Sci.: Nano, 2015,2, 630-644
Fe3O4	10-100	2 h	ec50	2000	0.00862069	E Coli	Bacteria	-2.06446	Kar et al. Chemosphere 264 (2021) 128428
Fe3O4	12	24 h	IC50	>500	#VALUE!	E.coli	Bacteria	#VALUE!	Kaweeteerawat et al. Environ. Sci. Technol. 2015, 49, 1105−1112
Fe3o4	-	48 h	IC50	1000	0.00431034	K562 cells	Human cells	-2.36549	Malekshah et al. ,2020, Drug Delivery, 27:1, 1201-1217
Fe3o4	-	12h	IC50	800	0.00344828	Saccharomyces cerevisae	Eukaryotes & Microalgae	-2.4624	Peng et al., Chemico-Biological Interactions,287,2018, 20-26,
Fe3o4	-	12h	EC50	800	0.00344828	Saccharomyces cerevisae	Eukaryotes & Microalgae	-2.4624	Peng et al., Chemico-Biological Interactions,287,2018, 20-26,
Fe3o4	-	12 h	EC50	1353	0.0058319	Saccharomyces cerevisae	Eukaryotes & Microalgae	-2.23419	Peng et al., Chemico-Biological Interactions,287,2018, 20-26,
Fe3o4	6	24 H	EC50	>500	#VALUE!	Hep 3B	Human cells	#VALUE!	Xie et al. International journal of Nanomedicine, 11, 2016, 3557—3570
Fe3o4	9	24 H	EC50	>500	#VALUE!	Hep 3B	Human cells	#VALUE!	Xie et al. International journal of Nanomedicine, 11, 2016, 3557—3570
Fe3o4	14	24 H	EC50	>500	#VALUE!	Hep 3B	Human cells	#VALUE!	Xie et al. International journal of Nanomedicine, 11, 2016, 3557—3570
Fe3o4	6	24 H	EC50	>500	#VALUE!	SK HEP 1	Human cells	#VALUE!	Xie et al. International journal of Nanomedicine, 11, 2016, 3557—3570
Fe3o4	9	24 H	EC50	>500	#VALUE!	SK HEP 1	Human cells	#VALUE!	Xie et al. International journal of Nanomedicine, 11, 2016, 3557—3570
Fe3o4	14	24 H	EC50	>500	#VALUE!	SK HEP 1	Human cells	#VALUE!	Xie et al. International journal of Nanomedicine, 11, 2016, 3557—3570
Ga2O3	654	5 days	ec50	>500	#VALUE!	Methanogenic archaea	Bacteria	#VALUE!	Nguyen et al. Journal of Environmental Science and Health, 2020 Part A, 55:2, 168-178
Ga2O3	654	15 min	ec50	>500	#VALUE!	Vibrio fischeri	Bacteria	#VALUE!	Nguyen et al. Journal of Environmental Science and Health, 2020 Part A, 55:2, 168-178
Gd2O3	72.76	24 h	EC50	952.157	0.00263027	A549 cells	Human cells	-2.58	Cao et al. Green Chem., 2020,22, 3512-3521
Gd2O3	15-30	24 h	ec50	>1000	#VALUE!	A549	Human cells	#VALUE!	Horie et al. Metallomics, 2012, 4, 350–360
Gd2O3	15-30	24 h	ec50	>1000	#VALUE!	Hacat	Human cells	#VALUE!	Horie et al. Metallomics, 2012, 4, 350–360
Gd2O3	<100	2 h	ec50	1212	0.00334807	E Coli	Bacteria	-2.47521	Kar et al. Chemosphere 264 (2021) 128428
Gd2O3	43.8	24 h	IC50	>500	-	E.coli	Bacteria	#VALUE!	Kaweeteerawat et al. Environ. Sci. Technol. 2015, 49, 1105−1112
Gd2O3	23.4	2 h	IC50	20	5.52486e-05	Brassica napus	Plant	-4.25768	Ma et al. Chemosphere 2010; 78 (3) 273-279
HfO2	43.86	24 h	EC50	1236.57	0.00588844	A549 cells	Human cells	-2.23	Cao et al. Green Chem., 2020,22, 3512-3521
HfO2	100	10 h	IC50	1000	0.0047619	Saccharomyces cerevisae	Eukaryotes & Microalgae	-2.32222	García-Saucedo et al. / Journal of Hazardous Materials 192 (2011) 1572–1579
HfO2	100	10 h	IC50	1000	0.0047619	Saccharomyces cerevisae	Eukaryotes & Microalgae	-2.32222	García-Saucedo et al. / Journal of Hazardous Materials 192 (2011) 1572–1579
HfO2	100	10 h	EC50	1000	0.0047619	Saccharomyces cerevisae	Eukaryotes & Microalgae	-2.32222	García-Saucedo et al. / Journal of Hazardous Materials 192 (2011) 1572–1579
HfO2	28.4	24 h	IC50	>500	#VALUE!	E.coli	Bacteria	#VALUE!	Kaweeteerawat et al. Environ. Sci. Technol. 2015, 49, 1105−1112
In2O3	77.15	24 h	EC50	326.622	0.0011749	A549 cells	Human cells	-2.93	Cao et al. Green Chem., 2020,22, 3512-3521
In2O3	29.8	24 h	LC50	332	0.00119424	Hacat cells	Human cells	-2.92291	Gajewicz et al. Nanotoxicology, 2015;9(3):313-25
In2O3	59.6	24 h	IC50	>500	#VALUE!	E.coli	Bacteria	#VALUE!	Kaweeteerawat et al. Environ. Sci. Technol. 2015, 49, 1105−1112
In2O3	626	5 days	ec50	>500	#VALUE!	Methanogenic archaea	Bacteria	#VALUE!	Nguyen et al. Journal of Environmental Science and Health, 2020 Part A, 55:2, 168-178
In2O3	626	15 min	ec50	>500	#VALUE!	Vibrio fischeri	Bacteria	#VALUE!	Nguyen et al. Journal of Environmental Science and Health, 2020 Part A, 55:2, 168-178
In2O3	60	30 min	LC50	411.192	0.00147911	E.coli	Bacteria	-2.83	Pathakoti et al. Journal of Photochemistry and Photobiology B: Biology 130 (2014) 234–240
In2O3	15-90	2 h	EC50	430.571	0.00154882	E.coli	Bacteria	-2.81	Puzyn et al. Nature Nanotech 6, 175–178 (2011)
La2O3	59	48 h	ec50	500	0.00153374	Daphnia magna	Crustacean	-2.81425	Balusamy et al. Environ. Sci.: Processes Impacts, 2015,17, 1265-1270
La2O3	75.81	24 h	EC50	450.005	0.00138038	A549 cells	Human cells	-2.86	Cao et al. Green Chem., 2020,22, 3512-3521
La2O3	45.6	24 h	LC50	443	0.0013589	Hacat cells	Human cells	-2.86681	Gajewicz et al. Nanotoxicology, 2015;9(3):313-25
La2O3	15-30	24 h	ec50	>1000	#VALUE!	A549	Human cells	#VALUE!	Horie et al. Metallomics, 2012, 4, 350–360
La2O3	15-30	24 h	ec50	>1000	#VALUE!	Hacat	Human cells	#VALUE!	Horie et al. Metallomics, 2012, 4, 350–360
La2O3	30-40	2 h	LD50	456.9	0.00140153	E.coli	Bacteria	-2.8534	Hu et al. Sci. Total Environ. 407 (2009) 3070–3072
La2O3	24.6	24 h	IC50	>500	#VALUE!	E.coli	Bacteria	#VALUE!	Kaweeteerawat et al. Environ. Sci. Technol. 2015, 49, 1105−1112
La2O3	103.6	48h	LD50	2.08	6.38037e-06	RAW 264.7	Mammalian cells	-5.19515	Lim et al.,Toxicol. Res.,(2015) Vol. 31, No. 2, pp. 181-189
La2O3	103.6	48h	LD50	50.58	0.000155153	a549	Human cells	-3.80924	Lim et al.,Toxicol. Res.,(2015) Vol. 31, No. 2, pp. 181-189
La2O3	21.8	2 h	IC51	40	0.000122699	Brassica napus	Plant	-3.91116	Ma et al. Chemosphere 2010; 78 (3) 273-279
La2O3	22	5 days	IC50	149	0.000457055	Cucumis sativus	Plant	-3.34003	Ma et al. Nanotoxicology 2011; 5(4) 743-753
La2O3	65	30 min	LC50	3.57452	1.09648e-05	E.coli	Bacteria	-4.96	Pathakoti et al. Journal of Photochemistry and Photobiology B: Biology 130 (2014) 234–240
La2O3	15-90	2 h	EC50	439.762	0.00134896	E.coli	Bacteria	-2.87	Puzyn et al. Nature Nanotech 6, 175–178 (2011)
MgO	23.8	24 h	ec50 (in SFM medium)	150	0.00375	A549 cells	Human cells	-2.42597	Areecheewakul, et al. NanoImpact 18 (2020) 100214
MgO	23.8	24 h	ec50 (in SFM medium)	>100	#VALUE!	A549 cells	Human cells	#VALUE!	Areecheewakul, et al. NanoImpact 18 (2020) 100214
MgO	23.8	24 h	ec50 (in SCM medium)	150	0.00375	A549 cells	Human cells	-2.42597	Areecheewakul, et al. NanoImpact 18 (2020) 100214
MgO	23.8	24 h	ec50 (in SCM medium)	>100	#VALUE!	A549 cells	Human cells	#VALUE!	Areecheewakul, et al. NanoImpact 18 (2020) 100214
MgO	13.6	24 h	EC50	>100	#VALUE!	Tetrahymena thermophila	Eukaryotes & Microalgae	#VALUE!	Aruoja et al Environ. Sci.: Nano, 2015,2, 630-644
MgO	13.6	30 min	EC50	>100	#VALUE!	Vibrio Fischeri	Bacteria	#VALUE!	Aruoja et al Environ. Sci.: Nano, 2015,2, 630-644
MgO	20	24 h	ec50	1000	0.025	A549	Human cells	-1.60206	Horie et al. Metallomics, 2012, 4, 350–360
MgO	20	24 h	ec50	1000	0.025	Hacat	Human cells	-1.60206	Horie et al. Metallomics, 2012, 4, 350–360
MgO	-	24 h	IC50	˃100	#VALUE!	A549	Human cells	#VALUE!	Ivansk et al. Curr Top Med Chem., 2015;15(18):1914-29
MgO	-	24 h	IC50	˃100	#VALUE!	Balb/c	Mammalian cells	#VALUE!	Ivansk et al. Curr Top Med Chem., 2015;15(18):1914-29
MgO	-	24 h	IC50	˃100	#VALUE!	Caco2	Human cells	#VALUE!	Ivansk et al. Curr Top Med Chem., 2015;15(18):1914-29
MgO	<50	48 h	LC50	140	0.0035	Danio rerio (adults)	Fish	-2.45593	Kovrižnychet al. Interdisciplinary Toxicology. 2013; Vol. 6(2): 67–73
MgO	<50	48 h	LC50	3200	0.08	Danio rerio (eggs)	Fish	-1.09691	Kovrižnychet al. Interdisciplinary Toxicology. 2013; Vol. 6(2): 67–73
MgO	<50	48 h	EC50	25.46	0.0006365	Daphnia magna	Crustacean	-3.1962	Sovova et al., 2009, Proceedings,NANOCON Conference, Roznov , Czech Republic, pp 62‐71,
MgO	<50	30 min	EC50	61.87	0.00154675	Vibrio fischeri	Bacteria	-2.81058	Sovova et al., 2009, Proceedings,NANOCON Conference, Roznov , Czech Republic, pp 62‐71,
Mn2O3	30-60	10 h	IC50	170	0.00107595	Saccharomyces cerevisae	Eukaryotes & Microalgae	-2.96821	Otero-González et al. / Chemosphere 93 (2013) 1201–1206
Mn2O3	30-60	10 h	IC50	280	0.00177215	Saccharomyces cerevisae	Eukaryotes & Microalgae	-2.7515	Otero-González et al. / Chemosphere 93 (2013) 1201–1206
Mn2O3	30-60	10 h	EC50	1000	0.00632911	Saccharomyces cerevisae	Eukaryotes & Microalgae	-2.19866	Otero-González et al. / Chemosphere 93 (2013) 1201–1206
Mn2O3	36.87	24 h	EC50	22.3181	0.000141254	A549 cells	Human cells	-3.85	Cao et al. Green Chem., 2020,22, 3512-3521
Mn2O3	29.8	24 h	LC50	362	0.00229114	Hacat cells	Human cells	-2.63995	Gajewicz et al. Nanotoxicology, 2015;9(3):313-25
Mn2O3	30-60	24 h	EC50	50	0.000316456	BEAS-2B	Human cells	-3.49969	Huang et al. Materials 2010, 3, 4842-4859;
Mn2O3	40-60	2 h	ec50	130	0.000822785	E Coli	Bacteria	-3.08471	Kar et al. Chemosphere 264 (2021) 128428
Mn2O3	51.5	24 h	IC50	70	0.000443038	E.coli	Bacteria	-3.35356	Kaweeteerawat et al. Environ. Sci. Technol. 2015, 49, 1105−1112
Mn2O3	51.5	24 h	EC50	10.2329	6.47654e-05	RAW 2647 cells, MTS assay	Mammalian cells	-4.18866	Zhang et al. ACS Nano 2012, 6, 5, 4349–4368
Mn2O3	51.5	24 h	EC50	11.2202	7.10138e-05	BEAS-2B cells, MTS assay	Human cells	-4.14866	Zhang et al. ACS Nano 2012, 6, 5, 4349–4368
Mn2O3	51.5	24 h	EC50	12.5893	7.96788e-05	RAW 2647 cells, ATP assay	Mammalian cells	-4.09866	Zhang et al. ACS Nano 2012, 6, 5, 4349–4368
Mn2O3	51.5	24 h	EC50	13.1826	8.3434e-05	BEAS-2B cells, ATP assay	Human cells	-4.07866	Zhang et al. ACS Nano 2012, 6, 5, 4349–4368
Mn3O4	14.9	24 h	IC50	66.7	0.000291266	Caco2	Human cells	-3.53571	Ivansk et al. Curr Top Med Chem., 2015;15(18):1914-29
Mn3O4	14.9	24 h	IC50	136.2	0.00059476	A549	Human cells	-3.22566	Ivansk et al. Curr Top Med Chem., 2015;15(18):1914-29
Mn3O4	14.9	24 h	IC50	195	0.000851528	Balb/c	Mammalian cells	-3.0698	Ivansk et al. Curr Top Med Chem., 2015;15(18):1914-29
Mn3o4	-	108	ec50	20.7	9.0393e-05	Caco2	Human cells	-4.04387	Titma et al. Cytotechnology. 2016;68(6):2363-2377
Mn3o4	-	216	ec50	28.9	0.000126201	Caco2	Human cells	-3.89894	Titma et al. Cytotechnology. 2016;68(6):2363-2377
Mn3o4	-	108	ec50	31.8	0.000138865	A549	Human cells	-3.85741	Titma et al. Cytotechnology. 2016;68(6):2363-2377
Mn3o4	-	60 h	ec50	33.2	0.000144978	Caco2	Human cells	-3.8387	Titma et al. Cytotechnology. 2016;68(6):2363-2377
Mn3o4	-	60 h	ec50	39.2	0.000171179	A549	Human cells	-3.76655	Titma et al. Cytotechnology. 2016;68(6):2363-2377
Mn3o4	-	216	ec50	47.1	0.000205677	A549	Human cells	-3.68681	Titma et al. Cytotechnology. 2016;68(6):2363-2377
Mn3o4	-	24 h	ec50	49.9	0.000217904	Balb/c 3T3	Mammalian cells	-3.66173	Titma et al. Cytotechnology. 2016;68(6):2363-2377
Mn3o4	-	36 h	ec50	90.6	0.000395633	A549	Human cells	-3.40271	Titma et al. Cytotechnology. 2016;68(6):2363-2377
MoO3	100	24 h	ec50	1000	0.00694444	A549	Human cells	-2.15836	Horie et al. Metallomics, 2012, 4, 350–360
MoO3	100	24 h	ec50	1000	0.00694444	Hacat	Human cells	-2.15836	Horie et al. Metallomics, 2012, 4, 350–360
Ni	6.1	48 h	LC50	0.674	1.14237e-05	Ceriodaphnia dubia (neonates)	Crustacean	-4.94219	Griffit et al. Environm. Toxicol. Chem. 2008; 27 (9) 1972–1978
Ni	6.1	48 h	LC50	3.89	6.59322e-05	Daphnia pulex (adults)	Crustacean	-4.1809	Griffit et al. Environm. Toxicol. Chem. 2008; 27 (9) 1972–1978
Ni	64-69	24 h	IC50	79.46	0.00134678	THP-1	Human cells	-2.8707	Lanone et al. Particle and Fibre Toxicology 2009, 6, 14
Ni	64-69	24 h	IC50	1032	0.0174915	a549	Human cells	-1.75717	Lanone et al. Particle and Fibre Toxicology 2009, 6, 14
Ni	64-69	24 h	IC50	141	0.00238983	THP-1	Human cells	-2.62163	Lanone et al. Particle and Fibre Toxicology 2009, 6, 14
Ni	64-69	24 h	IC50	509.9	0.00864237	a549	Human cells	-2.06337	Lanone et al. Particle and Fibre Toxicology 2009, 6, 14
Ni2O3	140.6	24 h	IC50	181	0.00109697	E.coli	Bacteria	-2.95981	Kaweeteerawat et al. Environ. Sci. Technol. 2015, 49, 1105−1112
Ni2O3	140.6	24 h	EC50	63.0957	0.000382398	BEAS-2B cells, ATP assay	Human cells	-3.41748	Zhang et al. ACS Nano 2012, 6, 5, 4349–4368
Ni2O3	140.6	24 h	EC50	87.0964	0.000527857	RAW 2647 cells, ATP assay	Mammalian cells	-3.27748	Zhang et al. ACS Nano 2012, 6, 5, 4349–4368
Ni2O3	140.6	24 h	EC50	316.228	0.00191653	RAW 2647 cells, MTS assay	Mammalian cells	-2.71748	Zhang et al. ACS Nano 2012, 6, 5, 4349–4368
Ni2O3	140.6	24 h	EC50	331.131	0.00200686	BEAS-2B cells, MTS assay	Human cells	-2.69748	Zhang et al. ACS Nano 2012, 6, 5, 4349–4368
NiO	10.96	24 h	EC50	90.1698	0.00120226	A549 cells	Human cells	-2.92	Cao et al. Green Chem., 2020,22, 3512-3521
NiO	20	24 h	LC50	242	0.00322667	Hacat cells	Human cells	-2.49125	Gajewicz et al. Nanotoxicology, 2015;9(3):313-25
NiO	10--20	24 h	EC50	25	0.000333333	BEAS-2B	Human cells	-3.47712	Huang et al. Materials 2010, 3, 4842-4859;
NiO	13.1	24 h	IC50	>500	#VALUE!	E.coli	Bacteria	#VALUE!	Kaweeteerawat et al. Environ. Sci. Technol. 2015, 49, 1105−1112
NiO	30	3 days	EC50	17.17	0.000228933	Lactuca sativa L.	Plants	-3.64029	Ko et al. Appl Microbiol Biotechnol (2014) 98:3295–3303
NiO	30	3 days	EC50	114.21	0.0015228	Raphanus sativus L	Plants	-2.81736	Ko et al. Appl Microbiol Biotechnol (2014) 98:3295–3303
NiO	30	1.5 h	EC50	198.02	0.00264027	E.coli	Bacteria	-2.57835	Ko et al. Appl Microbiol Biotechnol (2014) 98:3295–3303
NiO	8--20	4 days	EC50	0.57	7.6e-06	Lactuca sativa L.	Plants	-5.11919	Kong et al. Nanomaterials 2021, 11, 1653
NiO	8--20	4 days	EC50	2.85	3.8e-05	Raphanus sativus	Plants	-4.42022	Kong et al. Nanomaterials 2021, 11, 1653
NiO	8--20	4 days	EC50	5.57	7.42667e-05	Lactuca sativa L.	Plants	-4.12921	Kong et al. Nanomaterials 2021, 11, 1653
NiO		48 h	LC50	200	0.00266667	Danio rerio (adults)	Fish	-2.57403	Kovrižnychet al. Interdisciplinary Toxicology. 2013; Vol. 6(2): 67–73
NiO		48 h	LC50	800	0.0106667	Danio rerio (eggs)	Fish	-1.97197	Kovrižnychet al. Interdisciplinary Toxicology. 2013; Vol. 6(2): 67–73
NiO	48.9	24 h	IC50	23.31	0.0003108	THP-1	Human cells	-3.50752	Lanone et al. Particle and Fibre Toxicology 2009, 6, 14
NiO	48.9	24 h	IC50	994.9	0.0132653	a549	Human cells	-1.87728	Lanone et al. Particle and Fibre Toxicology 2009, 6, 14
NiO	48.9	24 h	IC50	1613	0.0215067	THP-1	Human cells	-1.66743	Lanone et al. Particle and Fibre Toxicology 2009, 6, 14
NiO	48.9	24 h	IC50	2.36	3.14667e-05	THP-1	Human cells	-4.50215	Lanone et al. Particle and Fibre Toxicology 2009, 6, 14
NiO	14	30 min	LC50	12.1636	0.000162181	E.coli	Bacteria	-3.79	Pathakoti et al. Journal of Photochemistry and Photobiology B: Biology 130 (2014) 234–240
NiO	15-90	2 h	EC50	26.611	0.000354813	E.coli	Bacteria	-3.45	Puzyn et al. Nature Nanotech 6, 175–178 (2011)
NiO	30	3 days	EC50	27.9	0.000372	Lactuca sativa	Plants	-3.42946	Wu et al. J Pet Environ Biotechnol, 2012, 3:126
NiO	30	3 days	EC50	228	0.00304	Cucumis sativus	Plant	-2.51713	Wu et al. J Pet Environ Biotechnol, 2012, 3:126
NiO	30	3 days	EC50	400	0.00533333	Raphanus sativus	Plants	-2.273	Wu et al. J Pet Environ Biotechnol, 2012, 3:126
NiO	13.1	24 h	EC50	151.356	0.00201808	RAW 2647 cells, MTS assay	Mammalian cells	-2.69506	Zhang et al. ACS Nano 2012, 6, 5, 4349–4368
NiO	13.1	24 h	EC50	416869	5.55826	BEAS-2B cells, MTS assay	Human cells	0.744939	Zhang et al. ACS Nano 2012, 6, 5, 4349–4368
NiO	13.1	24 h	EC50	>200	#VALUE!	BEAS-2B cells, MTS assay	Human cells	#VALUE!	Zhang et al. ACS Nano 2012, 6, 5, 4349–4368
NiO	13.1	24 h	EC50	>200	#VALUE!	RAW 2647 cells, MTS assay	Mammalian cells	#VALUE!	Zhang et al. ACS Nano 2012, 6, 5, 4349–4368
Pd	15.1	30 min	EC50	55.42	0.00052283	Vibrio Fischeri	Bacteria	-3.28164	Aruoja et al Environ. Sci.: Nano, 2015,2, 630-644
Pd	100	96 h	EC50	7.54	7.11321e-05	Soil bacterial community	Bacteria	-4.14793	Y. Zhai et al. Ecotoxicology and Environmental Safety 145 (2017) 349–358
Pd	150	96 h	EC50	9.36	8.83019e-05	Soil bacterial community	Bacteria	-4.05403	Y. Zhai et al. Ecotoxicology and Environmental Safety 145 (2017) 349–358
Sb2O3	20.5	30 min	EC50	73.74	0.000252534	Vibrio Fischeri	Bacteria	-3.59768	Aruoja et al Environ. Sci.: Nano, 2015,2, 630-644
Sb2O3	107.91	24 h	EC50	422.068	0.00144544	A549 cells	Human cells	-2.84	Cao et al. Green Chem., 2020,22, 3512-3521
Sb2O3	90--210	24 h	LC50	1429	0.00489384	Hacat cells	Human cells	-2.31035	Gajewicz et al. Nanotoxicology, 2015;9(3):313-25
Sb2O3	20.8	24 h	IC50	39.1	0.000133904	Balb/c	Mammalian cells	-3.87321	Ivansk et al. Curr Top Med Chem., 2015;15(18):1914-29
Sb2O3	20.8	24 h	IC50	57.2	0.00019589	Caco2	Human cells	-3.70799	Ivansk et al. Curr Top Med Chem., 2015;15(18):1914-29
Sb2O3	20.8	24 h	IC50	79.9	0.00027363	A549	Human cells	-3.56284	Ivansk et al. Curr Top Med Chem., 2015;15(18):1914-29
Sb2O3	11.8	24 h	IC50	>500	#VALUE!	E.coli	Bacteria	#VALUE!	Kaweeteerawat et al. Environ. Sci. Technol. 2015, 49, 1105−1112
Sb2O3	84	30 min	LC50	221.505	0.000758578	E.coli	Bacteria	-3.12	Pathakoti et al. Journal of Photochemistry and Photobiology B: Biology 130 (2014) 234–240
Sb2O3	15-90	2 h	EC50	668.933	0.00229087	E.coli	Bacteria	-2.64	Puzyn et al. Nature Nanotech 6, 175–178 (2011)
Sb2O3	-	24 h	ec50	10	3.42466e-05	Caco2	Human cells	-4.46538	Titma et al. Cytotechnology. 2016;68(6):2363-2377
Sb2O3	-	48 h	ec50	10	3.42466e-05	Caco2	Human cells	-4.46538	Titma et al. Cytotechnology. 2016;68(6):2363-2377
Sb2O3	-	72	ec50	10	3.42466e-05	Caco2	Human cells	-4.46538	Titma et al. Cytotechnology. 2016;68(6):2363-2377
Sb2O3	-	24 h	ec50	15.3	5.23973e-05	Balb/c 3T3	Mammalian cells	-4.28069	Titma et al. Cytotechnology. 2016;68(6):2363-2377
Sb2O3	-	216	ec50	22	7.53425e-05	A549	Human cells	-4.12296	Titma et al. Cytotechnology. 2016;68(6):2363-2377
Sb2O3	-	60 h	ec50	38	0.000130137	Caco2	Human cells	-3.8856	Titma et al. Cytotechnology. 2016;68(6):2363-2377
Sb2O3	-	108	ec50	38.5	0.000131849	A549	Human cells	-3.87992	Titma et al. Cytotechnology. 2016;68(6):2363-2377
Sb2O3	-	108	ec50	47.4	0.000162329	Caco2	Human cells	-3.7896	Titma et al. Cytotechnology. 2016;68(6):2363-2377
Sb2O3	-	216	ec50	48.2	0.000165068	Caco2	Human cells	-3.78234	Titma et al. Cytotechnology. 2016;68(6):2363-2377
Sb2O3	-	60 h	ec50	59.1	0.000202397	A549	Human cells	-3.6938	Titma et al. Cytotechnology. 2016;68(6):2363-2377
Sb2O3	-	36 h	ec50	66.8	0.000228767	Caco2	Human cells	-3.64061	Titma et al. Cytotechnology. 2016;68(6):2363-2377
Sb2O3	-	36 h	ec50	84.6	0.000289726	A549	Human cells	-3.53801	Titma et al. Cytotechnology. 2016;68(6):2363-2377
SiO2	7.8	24 h	EC50	>100	#VALUE!	Tetrahymena thermophila	Eukaryotes & Microalgae	#VALUE!	Aruoja et al Environ. Sci.: Nano, 2015,2, 630-644
SiO2	7.8	30 min	EC50	>100	#VALUE!	Vibrio Fischeri	Bacteria	#VALUE!	Aruoja et al Environ. Sci.: Nano, 2015,2, 630-644
SiO2	212	4 h	ec50	>100	#VALUE!	Bacillus subtilis	Bacteria	#VALUE!	Bondarenko et al. Nanotoxicology, 2016; 10(9): 1229–1242
SiO2	212	48 h	ec50	>100	#VALUE!	Daphnia magna	Crustacean	#VALUE!	Bondarenko et al. Nanotoxicology, 2016; 10(9): 1229–1242
SiO2	212	4 h	ec50	>100	#VALUE!	Escherichia Coli	Bacteria	#VALUE!	Bondarenko et al. Nanotoxicology, 2016; 10(9): 1229–1242
SiO2	212	24 h	ec50	>100	#VALUE!	human mesenchymal stem cells	Human cells	#VALUE!	Bondarenko et al. Nanotoxicology, 2016; 10(9): 1229–1242
SiO2	212	24 h	ec50	>100	#VALUE!	human mesenchymal stem cells (MTT)	Human cells	#VALUE!	Bondarenko et al. Nanotoxicology, 2016; 10(9): 1229–1242
SiO2	212	48 h	ec50	>100	#VALUE!	murine Fibroblasts (membrane integrity)	Mammalian cells	#VALUE!	Bondarenko et al. Nanotoxicology, 2016; 10(9): 1229–1242
SiO2	212	24 h	ec50	>100	#VALUE!	murine Fibroblasts BALB/c 3t3	Mammalian cells	#VALUE!	Bondarenko et al. Nanotoxicology, 2016; 10(9): 1229–1242
SiO2	212	4 h	ec50	>100	#VALUE!	Pseudomonas aeruginosa	Bacteria	#VALUE!	Bondarenko et al. Nanotoxicology, 2016; 10(9): 1229–1242
SiO2	212	4 h	ec50	>100	#VALUE!	Pseudomonas putida	Bacteria	#VALUE!	Bondarenko et al. Nanotoxicology, 2016; 10(9): 1229–1242
SiO2	212	-	ec50	>100	#VALUE!	rat macrophages	Mammalian cells	#VALUE!	Bondarenko et al. Nanotoxicology, 2016; 10(9): 1229–1242
SiO2	212	4 h	ec50	>100	#VALUE!	Staphylococcus aureus	Bacteria	#VALUE!	Bondarenko et al. Nanotoxicology, 2016; 10(9): 1229–1242
SiO2	212	24 h	ec50	>100	#VALUE!	Tetrahymena thermophila	Eukaryotes & Microalgae	#VALUE!	Bondarenko et al. Nanotoxicology, 2016; 10(9): 1229–1242
SiO2	212	30 min	ec50	>100	#VALUE!	Vibrio fischeri	Bacteria	#VALUE!	Bondarenko et al. Nanotoxicology, 2016; 10(9): 1229–1242
SiO2	15.23	24 h	EC50	293.867	0.00489779	A549 cells	Human cells	-2.31	Cao et al. Green Chem., 2020,22, 3512-3521
SiO2	15	24 h	LC50	453	0.00755	Hacat cells	Human cells	-2.12205	Gajewicz et al. Nanotoxicology, 2015;9(3):313-25
SiO2	10--20	10 h	IC50	1000	0.0166667	Saccharomyces cerevisae	Eukaryotes & Microalgae	-1.77815	García-Saucedo et al. / Journal of Hazardous Materials 192 (2011) 1572–1579
SiO2	10--20	10 h	IC50	1000	0.0166667	Saccharomyces cerevisae	Eukaryotes & Microalgae	-1.77815	García-Saucedo et al. / Journal of Hazardous Materials 192 (2011) 1572–1579
SiO2	10--20	10 h	EC50	1000	0.0166667	Saccharomyces cerevisae	Eukaryotes & Microalgae	-1.77815	García-Saucedo et al. / Journal of Hazardous Materials 192 (2011) 1572–1579
SiO2	12	24 h	IC50	>100	#VALUE!	A549	Human cells	#VALUE!	Ivansk et al. Curr Top Med Chem., 2015;15(18):1914-29
SiO2	12	24 h	IC50	˃100	#VALUE!	Balb/c	Mammalian cells	#VALUE!	Ivansk et al. Curr Top Med Chem., 2015;15(18):1914-29
SiO2	12	24 h	IC50	˃100	#VALUE!	Caco2	Human cells	#VALUE!	Ivansk et al. Curr Top Med Chem., 2015;15(18):1914-29
SiO2	15	24 h	LC50	>100	#VALUE!	gill cells	Fish	#VALUE!	Katsumiti et al. Nanotoxicology. 2016;10(2):185-93
SiO2	15	24 h	LC50	>100	#VALUE!	hemocytes	other	#VALUE!	Katsumiti et al. Nanotoxicology. 2016;10(2):185-93
SiO2	30	24 h	LC50	>100	#VALUE!	gill cells	Fish	#VALUE!	Katsumiti et al. Nanotoxicology. 2016;10(2):185-93
SiO2	30	24 h	LC50	>100	#VALUE!	hemocytes	other	#VALUE!	Katsumiti et al. Nanotoxicology. 2016;10(2):185-93
SiO2	70	24 h	LC50	>100	#VALUE!	gill cells	Fish	#VALUE!	Katsumiti et al. Nanotoxicology. 2016;10(2):185-93
SiO2	70	24 h	LC50	>100	#VALUE!	hemocytes	other	#VALUE!	Katsumiti et al. Nanotoxicology. 2016;10(2):185-93
SiO2	27	24 h	LC50	>100	#VALUE!	gill cells	Fish	#VALUE!	Katsumiti et al. Nanotoxicology. 2016;10(2):185-93
SiO2	27	24 h	LC50	>100	#VALUE!	hemocytes	other	#VALUE!	Katsumiti et al. Nanotoxicology. 2016;10(2):185-93
SiO2	13.5	24 h	IC50	500	0.00833333	E.coli	Bacteria	-2.07918	Kaweeteerawat et al. Environ. Sci. Technol. 2015, 49, 1105−1112
SiO2		48 h	LC50	1600	0.0266667	Danio rerio (adults)	Fish	-1.57403	Kovrižnychet al. Interdisciplinary Toxicology. 2013; Vol. 6(2): 67–73
SiO2		48 h	LC50	1600	0.0266667	Danio rerio (eggs)	Fish	-1.57403	Kovrižnychet al. Interdisciplinary Toxicology. 2013; Vol. 6(2): 67–73
SiO2	70	120 h	LC50	83.33	0.00138883	Danio rerio embryos	Fish	-2.85735	Lacave et al. Nanotechnology 27 (2016) 325102
SiO2	15	120 h	LC50	>100	#VALUE!	Danio rerio embryos	Fish	#VALUE!	Lacave et al. Nanotechnology 27 (2016) 325102
SiO2	30	120 h	LC50	>100	#VALUE!	Danio rerio embryos	Fish	#VALUE!	Lacave et al. Nanotechnology 27 (2016) 325102
SiO2	8.2	48 h	LC50	442.6	0.00737667	P. multimicronucleatum	Eukaryotes & Microalgae	-2.13214	Li et al. 2012, Chem. Res. Toxicol, 25, 1675−1681
SiO2	20	30 min	LC50	173.042	0.00288403	E.coli	Bacteria	-2.54	Pathakoti et al. Journal of Photochemistry and Photobiology B: Biology 130 (2014) 234–240
SiO2	15-90	2 h	EC50	378.574	0.00630957	E.coli	Bacteria	-2.2	Puzyn et al. Nature Nanotech 6, 175–178 (2011)
SiO2	13.5	24 h	EC50	200	0.00333333	BEAS-2B cells, ATP assay	Human cells	-2.47712	Zhang et al. ACS Nano 2012, 6, 5, 4349–4368
SiO2	13.5	24 h	EC50	200	0.00333333	RAW 2647 cells, ATP assay	Mammalian cells	-2.47712	Zhang et al. ACS Nano 2012, 6, 5, 4349–4368
SiO2	13.5	24 h	EC50	200	0.00333333	RAW 2647 cells, MTS assay	Mammalian cells	-2.47712	Zhang et al. ACS Nano 2012, 6, 5, 4349–4368
SiO2	13.5	24 h	EC50	2.75423e+07	459.038	BEAS-2B cells, MTS assay	Human cells	2.66185	Zhang et al. ACS Nano 2012, 6, 5, 4349–4368
Sn	<150	48 h	LC50	800	0.00672269	Danio rerio (adults)	Fish	-2.17246	Kovrižnychet al. Interdisciplinary Toxicology. 2013; Vol. 6(2): 67–73
Sn	<150	48 h	LC50	800	0.00672269	Danio rerio (eggs)	Fish	-2.17246	Kovrižnychet al. Interdisciplinary Toxicology. 2013; Vol. 6(2): 67–73
SnO2	26.85	24 h	EC50	5482.48	0.0363078	A549 cells	Human cells	-1.44	Cao et al. Green Chem., 2020,22, 3512-3521
SnO2	46.1	24 h	LC50	322	0.00213245	Hacat cells	Human cells	-2.67112	Gajewicz et al. Nanotoxicology, 2015;9(3):313-25
SnO2	21	24 h	ec50	1000	0.00662252	A549	Human cells	-2.17898	Horie et al. Metallomics, 2012, 4, 350–360
SnO2	21	24 h	ec50	1000	0.00662252	Hacat	Human cells	-2.17898	Horie et al. Metallomics, 2012, 4, 350–360
SnO2	30-40	2 h	LD50	1045.6	0.0069245	E.coli	Bacteria	-2.15961	Hu et al. Sci. Total Environ. 407 (2009) 3070–3072
SnO2	62.4	24 h	IC50	500	0.00331126	E.coli	Bacteria	-2.48001	Kaweeteerawat et al. Environ. Sci. Technol. 2015, 49, 1105−1112
SnO2	<100	48 h	LC50	1600	0.010596	Danio rerio (adults)	Fish	-1.97486	Kovrižnychet al. Interdisciplinary Toxicology. 2013; Vol. 6(2): 67–73
SnO2	<100	48 h	LC50	1600	0.010596	Danio rerio (eggs)	Fish	-1.97486	Kovrižnychet al. Interdisciplinary Toxicology. 2013; Vol. 6(2): 67–73
SnO2	33	24 h	IC50	3.33	2.2053e-05	THP-1	Human cells	-4.65653	Lanone et al. Particle and Fibre Toxicology 2009, 6, 14
SnO2	33	24 h	IC50	174	0.00115232	THP-1	Human cells	-2.93843	Lanone et al. Particle and Fibre Toxicology 2009, 6, 14
SnO2	33	24 h	IC50	562.1	0.00372252	THP-1	Human cells	-2.42916	Lanone et al. Particle and Fibre Toxicology 2009, 6, 14
SnO2	15	30 min	LC50	445.633	0.00295121	E.coli	Bacteria	-2.53	Pathakoti et al. Journal of Photochemistry and Photobiology B: Biology 130 (2014) 234–240
SnO2	15-90	2 h	EC50	1475.63	0.00977237	E.coli	Bacteria	-2.01	Puzyn et al. Nature Nanotech 6, 175–178 (2011)
SnO2	62.4	24 h	EC50	100000	0.662252	RAW 2647 cells, ATP assay	Mammalian cells	-0.178977	Zhang et al. ACS Nano 2012, 6, 5, 4349–4368
SnO2	62.4	24 h	EC50	>200	#VALUE!	BEAS-2B cells, ATP assay	Human cells	#VALUE!	Zhang et al. ACS Nano 2012, 6, 5, 4349–4368
SnO2	62.4	24 h	EC50	>200	#VALUE!	BEAS-2B cells, MTS assay	Human cells	#VALUE!	Zhang et al. ACS Nano 2012, 6, 5, 4349–4368
SnO2	62.4	24 h	EC50	>200	#VALUE!	RAW 2647 cells, MTS assay	Mammalian cells	#VALUE!	Zhang et al. ACS Nano 2012, 6, 5, 4349–4368
TiO2	21	10 h	IC50	1000	0.0125	Saccharomyces cerevisae	Eukaryotes & Microalgae	-1.90309	Otero-González et al. / Chemosphere 93 (2013) 1201–1206
TiO2	21	10 h	IC50	1000	0.0125	Saccharomyces cerevisae	Eukaryotes & Microalgae	-1.90309	Otero-González et al. / Chemosphere 93 (2013) 1201–1206
TiO2	21	10 h	EC50	1000	0.0125	Saccharomyces cerevisae	Eukaryotes & Microalgae	-1.90309	Otero-González et al. / Chemosphere 93 (2013) 1201–1206
TiO2	113.4	24 h	ec50 (in SFM medium)	>150	#VALUE!	A549 cells	Human cells	#VALUE!	Areecheewakul, et al. NanoImpact 18 (2020) 100214
TiO2	113.4	24 h	ec50 (in SFM medium)	>150	#VALUE!	A549 cells	Human cells	#VALUE!	Areecheewakul, et al. NanoImpact 18 (2020) 100214
TiO2	113.4	24 h	ec50 (in SCM medium)	>150	#VALUE!	A549 cells	Human cells	#VALUE!	Areecheewakul, et al. NanoImpact 18 (2020) 100214
TiO2	113.4	24 h	ec50 (in SCM medium)	>150	#VALUE!	A549 cells	Human cells	#VALUE!	Areecheewakul, et al. NanoImpact 18 (2020) 100214
TiO2	12.2	24 h	EC50	52.62	0.00065775	Tetrahymena thermophila	Eukaryotes & Microalgae	-3.18194	Aruoja et al Environ. Sci.: Nano, 2015,2, 630-644
TiO2	5	4 h	ec50	>100	#VALUE!	Bacillus subtilis	Bacteria	#VALUE!	Bondarenko et al. Nanotoxicology, 2016; 10(9): 1229–1242
TiO2	5	48 h	ec50	>100	#VALUE!	Daphnia magna	Crustacean	#VALUE!	Bondarenko et al. Nanotoxicology, 2016; 10(9): 1229–1242
TiO2	5	4 h	ec50	>100	#VALUE!	Escherichia Coli	Bacteria	#VALUE!	Bondarenko et al. Nanotoxicology, 2016; 10(9): 1229–1242
TiO2	5	24 h	ec50	>100	#VALUE!	human mesenchymal stem cells	Human cells	#VALUE!	Bondarenko et al. Nanotoxicology, 2016; 10(9): 1229–1242
TiO2	5	24 h	ec50	>100	#VALUE!	human mesenchymal stem cells (MTT)	Human cells	#VALUE!	Bondarenko et al. Nanotoxicology, 2016; 10(9): 1229–1242
TiO2	5	48 h	ec50	>100	#VALUE!	murine Fibroblasts (membrane integrity)	Mammalian cells	#VALUE!	Bondarenko et al. Nanotoxicology, 2016; 10(9): 1229–1242
TiO2	5	24 h	ec50	>100	#VALUE!	murine Fibroblasts BALB/c 3t3	Mammalian cells	#VALUE!	Bondarenko et al. Nanotoxicology, 2016; 10(9): 1229–1242
TiO2	5	4 h	ec50	>100	#VALUE!	Pseudomonas aeruginosa	Bacteria	#VALUE!	Bondarenko et al. Nanotoxicology, 2016; 10(9): 1229–1242
TiO2	5	4 h	ec50	>100	#VALUE!	Pseudomonas putida	Bacteria	#VALUE!	Bondarenko et al. Nanotoxicology, 2016; 10(9): 1229–1242
TiO2	5	-	ec50	>100	#VALUE!	rat macrophages	Mammalian cells	#VALUE!	Bondarenko et al. Nanotoxicology, 2016; 10(9): 1229–1242
TiO2	5	4 h	ec50	>100	#VALUE!	Staphylococcus aureus	Bacteria	#VALUE!	Bondarenko et al. Nanotoxicology, 2016; 10(9): 1229–1242
TiO2	5	24 h	ec50	>100	#VALUE!	Tetrahymena thermophila	Eukaryotes & Microalgae	#VALUE!	Bondarenko et al. Nanotoxicology, 2016; 10(9): 1229–1242
TiO2	5	30 min	ec50	>100	#VALUE!	Vibrio fischeri	Bacteria	#VALUE!	Bondarenko et al. Nanotoxicology, 2016; 10(9): 1229–1242
TiO2	5	96 h	ec50	>100	#VALUE!	zebrafish (danio rerio)	Fish	#VALUE!	Bondarenko et al. Nanotoxicology, 2016; 10(9): 1229–1242
TiO2	21.2	24 h	EC50	129.745	0.00162181	A549 cells	Human cells	-2.79	Cao et al. Green Chem., 2020,22, 3512-3521
TiO2	42.3	30 min	LC50	583	0.0072875	Escherichia Coli	Bacteria	-2.13742	Dasari et al. J Environ Sci, 2013;25(5):882-8
TiO2	42.3	24 h	LC50	1389	0.0173625	Hacat cells	Human cells	-1.76039	Gajewicz et al. Nanotoxicology, 2015;9(3):313-25
TiO2	<5	24 h	ec50	>100	#VALUE!	RTgutGC	Fish	#VALUE!	Geppert et al. Environ. Sci.: Nano, 2021,8, 2249-2260
TiO2	25-70	48 h	LC50	20000	0.25	Daphnia magna (neonates)	Crustacean	-0.60206	Heinlaan et al. Chemosphere 2008; 71 (7) 1308-1316
TiO2	25-70	24 h	LC50	20000	0.25	Thamnocephalus platyurus	Crustacean	-0.60206	Heinlaan et al. Chemosphere 2008; 71 (7) 1308-1316
TiO2	25-70	30 min	EC50	20000	0.25	Vibrio fischeri	Bacteria	-0.60206	Heinlaan et al. Chemosphere 2008; 71 (7) 1308-1316
TiO2	30-50	24 h	ec50	1000	0.0125	A549	Human cells	-1.90309	Horie et al. Metallomics, 2012, 4, 350–360
TiO2	5--15	24 h	ec50	1000	0.0125	A549	Human cells	-1.90309	Horie et al. Metallomics, 2012, 4, 350–360
TiO2	5--15	24 h	ec50	1000	0.0125	A549	Human cells	-1.90309	Horie et al. Metallomics, 2012, 4, 350–360
TiO2	30-50	24 h	ec50	1000	0.0125	Hacat	Human cells	-1.90309	Horie et al. Metallomics, 2012, 4, 350–360
TiO2	5--15	24 h	ec50	1000	0.0125	Hacat	Human cells	-1.90309	Horie et al. Metallomics, 2012, 4, 350–360
TiO2	5--15	24 h	ec50	1000	0.0125	Hacat	Human cells	-1.90309	Horie et al. Metallomics, 2012, 4, 350–360
TiO2	30-40	2 h	LD50	1104	0.0138	E.coli	Bacteria	-1.86012	Hu et al. Sci. Total Environ. 407 (2009) 3070–3072
TiO2	10--30	24 h	EC50	>100	#VALUE!	BEAS-2B	Human cells	#VALUE!	Huang et al. Materials 2010, 3, 4842-4859;
TiO2	50-70	2 h	ec50	20000	0.25	E. coli AB1157	Bacteria	-0.60206	Ivansk et al Anal Bioanal Chem (2010) 398:701–716
TiO2	50-70	30 min	ec50	20000	0.25	E. coli AB1157	Bacteria	-0.60206	Ivansk et al Anal Bioanal Chem (2010) 398:701–716
TiO2	50-70	2 h	ec50	20000	0.25	E. coli AS391	Bacteria	-0.60206	Ivansk et al Anal Bioanal Chem (2010) 398:701–716
TiO2	50-70	30 min	ec50	20000	0.25	E. coli AS391	Bacteria	-0.60206	Ivansk et al Anal Bioanal Chem (2010) 398:701–716
TiO2	50-70	2 h	ec50	20000	0.25	E. coli AS393	Bacteria	-0.60206	Ivansk et al Anal Bioanal Chem (2010) 398:701–716
TiO2	50-70	30 min	ec50	20000	0.25	E. coli AS393	Bacteria	-0.60206	Ivansk et al Anal Bioanal Chem (2010) 398:701–716
TiO2	50-70	2 h	ec50	20000	0.25	E. coli JI130	Bacteria	-0.60206	Ivansk et al Anal Bioanal Chem (2010) 398:701–716
TiO2	50-70	30 min	ec50	20000	0.25	E. coli JI130	Bacteria	-0.60206	Ivansk et al Anal Bioanal Chem (2010) 398:701–716
TiO2	50-70	2 h	ec50	20000	0.25	E. coli JI131	Bacteria	-0.60206	Ivansk et al Anal Bioanal Chem (2010) 398:701–716
TiO2	50-70	30 min	ec50	20000	0.25	E. coli JI131	Bacteria	-0.60206	Ivansk et al Anal Bioanal Chem (2010) 398:701–716
TiO2	50-70	2 h	ec50	20000	0.25	E. coli JI132	Bacteria	-0.60206	Ivansk et al Anal Bioanal Chem (2010) 398:701–716
TiO2	50-70	30 min	ec50	20000	0.25	E. coli JI132	Bacteria	-0.60206	Ivansk et al Anal Bioanal Chem (2010) 398:701–716
TiO2	14.2	24 h	IC50	˃100	#VALUE!	A549	Human cells	#VALUE!	Ivansk et al. Curr Top Med Chem., 2015;15(18):1914-29
TiO2	14.2	24 h	IC50	˃100	#VALUE!	Balb/c	Mammalian cells	#VALUE!	Ivansk et al. Curr Top Med Chem., 2015;15(18):1914-29
TiO2	14.2	24 h	IC50	˃100	#VALUE!	Caco2	Human cells	#VALUE!	Ivansk et al. Curr Top Med Chem., 2015;15(18):1914-29
TiO2	<40	12 h	EC50	>200	#VALUE!	Neuro 2A cells	Mammalian cells	#VALUE!	Jeng et al. ron Sci Health A Tox Hazard Subst Environ Eng. 2006;41(12):2699-711
TiO2	<40	12 h	EC50	>200	#VALUE!	Neuro 2A cells	Mammalian cells	#VALUE!	Jeng et al. ron Sci Health A Tox Hazard Subst Environ Eng. 2006;41(12):2699-711
TiO2	39.9	24 h	EC50	4000	0.004	A549 CELLS	Human cells	-2.39794	Jeong et al. Front Pharmacol. 2018 22;9:15.
TiO2	39.9	24 h	EC50	4000	0.004	THP-1 CELLS	Human cells	-2.39794	Jeong et al. Front Pharmacol. 2018 22;9:15.
TiO2	25-70	24 h	EC50	20000	0.25	Saccharomyces cerevisiae S288C	Eukaryotes & Microalgae	-0.60206	Kasemets et al. Toxicol. In Vitro 2009; 23 (6) 1116-1122
TiO2	25-70	8 h	EC50	20000	0.25	Saccharomyces cerevisiae S288C	Eukaryotes & Microalgae	-0.60206	Kasemets et al. Toxicol. In Vitro 2009; 23 (6) 1116-1122
TiO2	12.6	24 h	IC50	500	0.00625	E.coli	Bacteria	-2.20412	Kaweeteerawat et al. Environ. Sci. Technol. 2015, 49, 1105−1112
TiO2	<25	1.5 h	EC50	1000	0.0125	E.coli	Bacteria	-1.90309	Ko et al. Appl Microbiol Biotechnol (2014) 98:3295–3303
TiO2	<25	3 days	EC50	1000	0.0125	Lactuca sativa L.	Plants	-1.90309	Ko et al. Appl Microbiol Biotechnol (2014) 98:3295–3303
TiO2	<25	3 days	EC50	1000	0.0125	Raphanus sativus L	Plants	-1.90309	Ko et al. Appl Microbiol Biotechnol (2014) 98:3295–3303
TiO2	<25	4 days	EC50	1000	0.0125	Lactuca sativa L.	Plants	-1.90309	Kong et al. Nanomaterials 2021, 11, 1653
TiO2	<25	4 days	EC50	1000	0.0125	Lactuca sativa L.	Plants	-1.90309	Kong et al. Nanomaterials 2021, 11, 1653
TiO2	<25	4 days	EC50	1000	0.0125	Raphanus sativus	Plants	-1.90309	Kong et al. Nanomaterials 2021, 11, 1653
TiO2	<100	48 h	LC50	1600	0.02	Danio rerio (adults)	Fish	-1.69897	Kovrižnychet al. Interdisciplinary Toxicology. 2013; Vol. 6(2): 67–73
TiO2	<100	48 h	LC50	1600	0.02	Danio rerio (eggs)	Fish	-1.69897	Kovrižnychet al. Interdisciplinary Toxicology. 2013; Vol. 6(2): 67–73
TiO2	12.2	24 h	IC50	369.2	0.004615	THP-1	Human cells	-2.33583	Lanone et al. Particle and Fibre Toxicology 2009, 6, 14
TiO2	12.2	24 h	IC50	432	0.0054	THP-1	Human cells	-2.26761	Lanone et al. Particle and Fibre Toxicology 2009, 6, 14
TiO2	12.2	24 h	IC50	845.2	0.010565	THP-1	Human cells	-1.97613	Lanone et al. Particle and Fibre Toxicology 2009, 6, 14
TiO2	12.2	24 h	IC50	95.97	0.00119962	THP-1	Human cells	-2.92095	Lanone et al. Particle and Fibre Toxicology 2009, 6, 14
TiO2	12.2	24 h	IC50	220.5	0.00275625	THP-1	Human cells	-2.55968	Lanone et al. Particle and Fibre Toxicology 2009, 6, 14
TiO2	12.2	24 h	IC50	1062	0.013275	THP-1	Human cells	-1.87697	Lanone et al. Particle and Fibre Toxicology 2009, 6, 14
TiO2	5.1	48 h	LC50	7215.2	0.09019	P. multimicronucleatum	Eukaryotes & Microalgae	-1.04484	Li et al. 2012, Chem. Res. Toxicol, 25, 1675−1681
TiO2	-	24 h	LD 50	1000	0.0125	A549	Human cells	-1.90309	Lozano et al 2011 J. Phys.: Conf. Ser. 304 012046
TiO2	-	48 h	LD 50	1000	0.0125	A549	Human cells	-1.90309	Lozano et al 2011 J. Phys.: Conf. Ser. 304 012046
TiO2	-	24 h	LD 50	1000	0.0125	HeLa cells	Human cells	-1.90309	Lozano et al 2011 J. Phys.: Conf. Ser. 304 012046
TiO2	-	48 h	LD 50	1000	0.0125	HeLa cells	Human cells	-1.90309	Lozano et al 2011 J. Phys.: Conf. Ser. 304 012046
TiO2	-	24 h	LD 50	1000	0.0125	NCl H460	Human cells	-1.90309	Lozano et al 2011 J. Phys.: Conf. Ser. 304 012046
TiO2	-	48 h	LD 50	1000	0.0125	NCl H460	Human cells	-1.90309	Lozano et al 2011 J. Phys.: Conf. Ser. 304 012046
TiO2	-	24 h	LD 50	1000	0.0125	SK- MES 1	Human cells	-1.90309	Lozano et al 2011 J. Phys.: Conf. Ser. 304 012046
TiO2	-	48 h	LD 50	1000	0.0125	SK- MES 1	Human cells	-1.90309	Lozano et al 2011 J. Phys.: Conf. Ser. 304 012046
TiO2	42	30 min	LC50	579.549	0.00724436	E.coli	Bacteria	-2.14	Pathakoti et al. Journal of Photochemistry and Photobiology B: Biology 130 (2014) 234–240
TiO2	15-90	2 h	EC50	1455.76	0.018197	E.coli	Bacteria	-1.74	Puzyn et al. Nature Nanotech 6, 175–178 (2011)
TiO2	>25	24 h	IC50	>100	#VALUE!	A549	Human cells	#VALUE!	Seiffert et al., 2012,Chem. Res. Toxicol., 25, 140–152
TiO2	>25	24 h	IC50	>100	#VALUE!	A549	Human cells	#VALUE!	Seiffert et al., 2012,Chem. Res. Toxicol., 25, 140–152
TiO2	>25	24 h	IC50	>100	#VALUE!	A549	Human cells	#VALUE!	Seiffert et al., 2012,Chem. Res. Toxicol., 25, 140–152
TiO2	>25	24 h	IC50	>100	#VALUE!	A549	Human cells	#VALUE!	Seiffert et al., 2012,Chem. Res. Toxicol., 25, 140–152
TiO2	>25	24 h	IC50	>100	#VALUE!	A549	Human cells	#VALUE!	Seiffert et al., 2012,Chem. Res. Toxicol., 25, 140–152
TiO2	>25	24 h	IC50	>100	#VALUE!	A549	Human cells	#VALUE!	Seiffert et al., 2012,Chem. Res. Toxicol., 25, 140–152
TiO2	>25	24 h	IC50	>100	#VALUE!	A549	Human cells	#VALUE!	Seiffert et al., 2012,Chem. Res. Toxicol., 25, 140–152
TiO2	>25	24 h	IC50	>100	#VALUE!	A549	Human cells	#VALUE!	Seiffert et al., 2012,Chem. Res. Toxicol., 25, 140–152
TiO2	>25	24 h	IC50	>100	#VALUE!	A549	Human cells	#VALUE!	Seiffert et al., 2012,Chem. Res. Toxicol., 25, 140–152
TiO2	>25	24 h	IC50	>100	#VALUE!	A549	Human cells	#VALUE!	Seiffert et al., 2012,Chem. Res. Toxicol., 25, 140–152
TiO2	<25	48 h	EC50	300	0.00375	Daphnia magna	Crustacean	-2.42597	Sovova et al., 2009, Proceedings,NANOCON Conference, Roznov , Czech Republic, pp 62‐71,
TiO2	-	36 h	ec50	>200	#VALUE!	A549	Human cells	#VALUE!	Titma et al. Cytotechnology. 2016;68(6):2363-2377
TiO2	-	12 h	ec50	>200	#VALUE!	A549	Human cells	#VALUE!	Titma et al. Cytotechnology. 2016;68(6):2363-2377
TiO2	-	24 h	ec50	>200	#VALUE!	A549	Human cells	#VALUE!	Titma et al. Cytotechnology. 2016;68(6):2363-2377
TiO2	-	60 h	ec50	>200	#VALUE!	A549	Human cells	#VALUE!	Titma et al. Cytotechnology. 2016;68(6):2363-2377
TiO2	-	108	ec50	>200	#VALUE!	A549	Human cells	#VALUE!	Titma et al. Cytotechnology. 2016;68(6):2363-2377
TiO2	-	216	ec50	>200	#VALUE!	A549	Human cells	#VALUE!	Titma et al. Cytotechnology. 2016;68(6):2363-2377
TiO2	-	36 h	ec50	>200	#VALUE!	A549	Human cells	#VALUE!	Titma et al. Cytotechnology. 2016;68(6):2363-2377
TiO2	-	12 h	ec50	>200	#VALUE!	A549	Human cells	#VALUE!	Titma et al. Cytotechnology. 2016;68(6):2363-2377
TiO2	-	24 h	ec50	>200	#VALUE!	A549	Human cells	#VALUE!	Titma et al. Cytotechnology. 2016;68(6):2363-2377
TiO2	-	60 h	ec50	>200	#VALUE!	A549	Human cells	#VALUE!	Titma et al. Cytotechnology. 2016;68(6):2363-2377
TiO2	-	108	ec50	>200	#VALUE!	A549	Human cells	#VALUE!	Titma et al. Cytotechnology. 2016;68(6):2363-2377
TiO2	-	216	ec50	>200	#VALUE!	A549	Human cells	#VALUE!	Titma et al. Cytotechnology. 2016;68(6):2363-2377
TiO2	-	24 h	ec50	>200	#VALUE!	Balb/c 3T3	Mammalian cells	#VALUE!	Titma et al. Cytotechnology. 2016;68(6):2363-2377
TiO2	-	24 h	ec50	>200	#VALUE!	Balb/c 3T3	Mammalian cells	#VALUE!	Titma et al. Cytotechnology. 2016;68(6):2363-2377
TiO2	-	36 h	ec50	>200	#VALUE!	Caco2	Human cells	#VALUE!	Titma et al. Cytotechnology. 2016;68(6):2363-2377
TiO2	-	12 h	ec50	>200	#VALUE!	Caco2	Human cells	#VALUE!	Titma et al. Cytotechnology. 2016;68(6):2363-2377
TiO2	-	24 h	ec50	>200	#VALUE!	Caco2	Human cells	#VALUE!	Titma et al. Cytotechnology. 2016;68(6):2363-2377
TiO2	-	60 h	ec50	>200	#VALUE!	Caco2	Human cells	#VALUE!	Titma et al. Cytotechnology. 2016;68(6):2363-2377
TiO2	-	108	ec50	>200	#VALUE!	Caco2	Human cells	#VALUE!	Titma et al. Cytotechnology. 2016;68(6):2363-2377
TiO2	-	216	ec50	>200	#VALUE!	Caco2	Human cells	#VALUE!	Titma et al. Cytotechnology. 2016;68(6):2363-2377
TiO2	-	36 h	ec50	>200	#VALUE!	Caco2	Human cells	#VALUE!	Titma et al. Cytotechnology. 2016;68(6):2363-2377
TiO2	-	12 h	ec50	>200	#VALUE!	Caco2	Human cells	#VALUE!	Titma et al. Cytotechnology. 2016;68(6):2363-2377
TiO2	-	24 h	ec50	>200	#VALUE!	Caco2	Human cells	#VALUE!	Titma et al. Cytotechnology. 2016;68(6):2363-2377
TiO2	-	60 h	ec50	>200	#VALUE!	Caco2	Human cells	#VALUE!	Titma et al. Cytotechnology. 2016;68(6):2363-2377
TiO2	-	108	ec50	>200	#VALUE!	Caco2	Human cells	#VALUE!	Titma et al. Cytotechnology. 2016;68(6):2363-2377
TiO2	-	216	ec50	>200	#VALUE!	Caco2	Human cells	#VALUE!	Titma et al. Cytotechnology. 2016;68(6):2363-2377
TiO2	<25	20 h	IC50	>100	#VALUE!	Tetrahymena Thermophila	Eukaryotes & Microalgae	#VALUE!	Ud Daula et al., Journal of Environmental Science and Health, Part A (2013) 48, 1343–1348
TiO2	<25	40 h	IC50	>100	#VALUE!	Tetrahymena Thermophila	Eukaryotes & Microalgae	#VALUE!	Ud Daula et al., Journal of Environmental Science and Health, Part A (2013) 48, 1343–1348
TiO2	<25	6 h	EC50	>100	#VALUE!	Tetrahymena Thermophila	Eukaryotes & Microalgae	#VALUE!	Ud Daula et al., Journal of Environmental Science and Health, Part A (2013) 48, 1343–1348
TiO2	<25	20 h	EC50	>100	#VALUE!	Tetrahymena Thermophila	Eukaryotes & Microalgae	#VALUE!	Ud Daula et al., Journal of Environmental Science and Health, Part A (2013) 48, 1343–1348
TiO2	<25	40 h	EC50	>100	#VALUE!	Tetrahymena Thermophila	Eukaryotes & Microalgae	#VALUE!	Ud Daula et al., Journal of Environmental Science and Health, Part A (2013) 48, 1343–1348
TiO2	30-50	3 days	EC50	5000	0.0625	Cucumis sativus	Plant	-1.20412	Wu et al. J Pet Environ Biotechnol, 2012, 3:126
TiO2	30-50	3 days	EC50	5000	0.0625	Lactuca sativa	Plants	-1.20412	Wu et al. J Pet Environ Biotechnol, 2012, 3:126
TiO2	30-50	3 days	EC50	5000	0.0625	Raphanus sativus	Plants	-1.20412	Wu et al. J Pet Environ Biotechnol, 2012, 3:126
TiO2	12.6	24 h	EC50	>200	#VALUE!	BEAS-2B cells, ATP assay	Human cells	#VALUE!	Zhang et al. ACS Nano 2012, 6, 5, 4349–4368
TiO2	12.6	24 h	EC50	>200	#VALUE!	BEAS-2B cells, MTS assay	Human cells	#VALUE!	Zhang et al. ACS Nano 2012, 6, 5, 4349–4368
TiO2	12.6	24 h	EC50	>200	#VALUE!	RAW 2647 cells, ATP assay	Mammalian cells	#VALUE!	Zhang et al. ACS Nano 2012, 6, 5, 4349–4368
TiO2	12.6	24 h	EC50	>200	#VALUE!	RAW 2647 cells, MTS assay	Mammalian cells	#VALUE!	Zhang et al. ACS Nano 2012, 6, 5, 4349–4368
TiO2	21	72 h	LC50	2.02	2.525e-05	Daphnia magna (neonates)	Crustacean	-4.59774	Zhu et al. Chemosphere 2010; 78 (3) 209-216
TiO2	21	72 h	EC50	1.62	2.025e-05	Daphnia magna (neonates)	Crustacean	-4.69357	Zhu et al. Chemosphere 2010; 78 (3) 209-216
TiO2	21	48 h	EC50	>100	#VALUE!	Daphnia magna (neonates)	Crustacean	#VALUE!	Zhu et al. Chemosphere 2010; 78 (3) 209-216
TiO2	<20	96 h	LC50	500	0.00625	Danio rerio (embryos)	Fish	-2.20412	Zhu et al., J. Environ. Sci. Health A Tox. Hazard Subst. Environ. Eng. 2008; 43 (3) 278-284
TiO2	<20	84 h	eC50	500	0.00625	Danio rerio (embryos)	Fish	-2.20412	Zhu et al., J. Environ. Sci. Health A Tox. Hazard Subst. Environ. Eng. 2008; 43 (3) 278-284
TiO2	<20	48 h	LC50	500	0.00625	Daphnia magna (neonates)	Crustacean	-2.20412	Zhu et al., J. Nanopart. Res. 2009; 11 (1) 67–75
TiO2	<20	48 h	EC50	500	0.00625	Daphnia magna (neonates)	Crustacean	-2.20412	Zhu et al., J. Nanopart. Res. 2009; 11 (1) 67–75
V2O3	-	24 h	LC50	855	0.0057	Hacat cells	Human cells	-2.24413	Gajewicz et al. Nanotoxicology, 2015;9(3):313-25
V2O3	-	30 min	LC50	49.6697	0.000331131	E.coli	Bacteria	-3.48	Pathakoti et al. Journal of Photochemistry and Photobiology B: Biology 130 (2014) 234–240
V2O3	15-90	2 h	EC50	108.665	0.000724436	E.coli	Bacteria	-3.14	Puzyn et al. Nature Nanotech 6, 175–178 (2011)
V2O3	-	48 h	eC50	20	0.000133333	a549	Human cells	-3.87506	Wörle-Knirsch et al., Environ. Sci. Technol. 2007, 41, 1, 331–336
W	<150	48 h	LC50	1600	0.00869565	Danio rerio (adults)	Fish	-2.0607	Kovrižnychet al. Interdisciplinary Toxicology. 2013; Vol. 6(2): 67–73
W	<150	48 h	LC50	1600	0.00869565	Danio rerio (eggs)	Fish	-2.0607	Kovrižnychet al. Interdisciplinary Toxicology. 2013; Vol. 6(2): 67–73
WO3	10.6	30 min	EC50	87.07	0.000375302	Vibrio Fischeri	Bacteria	-3.42562	Aruoja et al Environ. Sci.: Nano, 2015,2, 630-644
WO3	40.08	24 h	EC50	1274.93	0.00549541	A549 cells	Human cells	-2.26	Cao et al. Green Chem., 2020,22, 3512-3521
WO3	30-70	24 h	LC50	634	0.00273276	Hacat cells	Human cells	-2.5634	Gajewicz et al. Nanotoxicology, 2015;9(3):313-25
WO3	30	24 h	ec50	1000	0.00431034	A549	Human cells	-2.36549	Horie et al. Metallomics, 2012, 4, 350–360
WO3	30	24 h	ec50	1000	0.00431034	Hacat	Human cells	-2.36549	Horie et al. Metallomics, 2012, 4, 350–360
WO3	30-70	2 h	ec50	2000	0.00862069	E Coli	Bacteria	-2.06446	Kar et al. Chemosphere 264 (2021) 128428
WO3	16.6	24 h	IC50	>500	#VALUE!	E.coli	Bacteria	#VALUE!	Kaweeteerawat et al. Environ. Sci. Technol. 2015, 49, 1105−1112
WO3	<100	48 h	LC50	1600	0.00689655	Danio rerio (adults)	Fish	-2.16137	Kovrižnychet al. Interdisciplinary Toxicology. 2013; Vol. 6(2): 67–73
WO3	<100	48 h	LC50	1600	0.00689655	Danio rerio (eggs)	Fish	-2.16137	Kovrižnychet al. Interdisciplinary Toxicology. 2013; Vol. 6(2): 67–73
Y2O3	41.89	24 h	EC50	247.804	0.00109648	A549 cells	Human cells	-2.96	Cao et al. Green Chem., 2020,22, 3512-3521
Y2O3	38	24 h	LC50	1390	0.00615044	Hacat cells	Human cells	-2.21109	Gajewicz et al. Nanotoxicology, 2015;9(3):313-25
Y2O3	33	24 h	ec50	1000	0.00442478	A549	Human cells	-2.35411	Horie et al. Metallomics, 2012, 4, 350–360
Y2O3	33	24 h	ec50	1000	0.00442478	Hacat	Human cells	-2.35411	Horie et al. Metallomics, 2012, 4, 350–360
Y2O3	32.7	24 h	IC50	>500	#VALUE!	E.coli	Bacteria	#VALUE!	Kaweeteerawat et al. Environ. Sci. Technol. 2015, 49, 1105−1112
Y2O3	38	30 min	LC50	0.366529	1.62181e-06	E.coli	Bacteria	-5.79	Pathakoti et al. Journal of Photochemistry and Photobiology B: Biology 130 (2014) 234–240
Y2O3	15-90	2 h	EC50	304.866	0.00134896	E.coli	Bacteria	-2.87	Puzyn et al. Nature Nanotech 6, 175–178 (2011)
Yb2O3	99.85	24 h	EC50	556.54	0.00141254	A549 cells	Human cells	-2.85	Cao et al. Green Chem., 2020,22, 3512-3521
Yb2O3	61.7	24 h	IC50	>500	#VALUE!	E.coli	Bacteria	#VALUE!	Kaweeteerawat et al. Environ. Sci. Technol. 2015, 49, 1105−1112
Yb2O3	11.7	2 h	IC50	70	0.000177665	Brassica napus	Plant	-3.7504	Ma et al. Chemosphere 2010; 78 (3) 273-279
Yb2O3	12	5 days	EC50	182	0.000461929	Cucumis sativus	Plants	-3.33542	Zhang et al., Environ. Sci. Technol. 2012, 46, 3, 1834–1841
Zn	35	2 h	IC50	20	0.000307692	Brassica napus	Plant	-3.51188	Lin et al. Environm. Pollut. 2007 150 (2) 243-250
Zn	35	2 h	IC50	20	0.000307692	Lolium perenne	Plants	-3.51188	Lin et al. Environm. Pollut. 2007 150 (2) 243-250
Zn	35	2 h	IC50	50	0.000769231	Raphanus sativus	Plants	-3.11394	Lin et al. Environm. Pollut. 2007 150 (2) 243-250
Zn	40	15 min	EC50	20.5	0.000315385	Vibrio Fischeri	Bacteria	-3.50116	Zhang et al. Environ Monit Assess (2020) 192: 484
ZnO	45.7	24 h	ec50 (in SFM medium)	7.5	9.25926e-05	A549 cells	Human cells	-4.03342	Areecheewakul, et al. NanoImpact 18 (2020) 100214
ZnO	45.7	24 h	ec50 (in SFM medium)	50	0.000617284	A549 cells	Human cells	-3.20952	Areecheewakul, et al. NanoImpact 18 (2020) 100214
ZnO	45.7	24 h	ec50 (in SCM medium)	50	0.000617284	A549 cells	Human cells	-3.20952	Areecheewakul, et al. NanoImpact 18 (2020) 100214
ZnO	45.7	24 h	ec50 (in SCM medium)	75	0.000925926	A549 cells	Human cells	-3.03342	Areecheewakul, et al. NanoImpact 18 (2020) 100214
ZnO	20.4	24 h	EC50	1.84	2.2716e-05	Tetrahymena thermophila	Eukaryotes & Microalgae	-4.64367	Aruoja et al Environ. Sci.: Nano, 2015,2, 630-644
ZnO	20.4	30 min	EC50	11.52	0.000142222	Vibrio Fischeri	Bacteria	-3.84703	Aruoja et al Environ. Sci.: Nano, 2015,2, 630-644
ZnO	70	24 h	LC50	1.1	1.35802e-05	Thamnocephalus platyurus	Crustacean	-4.86709	Blinova et al. / Environmental Pollution 158 (2010) 41–4744
ZnO	70	24 h	LC50	1.4	1.7284e-05	Thamnocephalus platyurus	Crustacean	-4.76236	Blinova et al. / Environmental Pollution 158 (2010) 41–4744
ZnO	70	24 h	LC50	1.5	1.85185e-05	Thamnocephalus platyurus	Crustacean	-4.73239	Blinova et al. / Environmental Pollution 158 (2010) 41–4744
ZnO	70	24 h	LC50	3.6	4.44444e-05	Thamnocephalus platyurus	Crustacean	-4.35218	Blinova et al. / Environmental Pollution 158 (2010) 41–4744
ZnO	70	24 h	LC50	5.3	6.54321e-05	Thamnocephalus platyurus	Crustacean	-4.18421	Blinova et al. / Environmental Pollution 158 (2010) 41–4744
ZnO	70	24 h	LC50	6	7.40741e-05	Thamnocephalus platyurus	Crustacean	-4.13033	Blinova et al. / Environmental Pollution 158 (2010) 41–4744
ZnO	70	48 h	EC50	1.7	2.09877e-05	daphnia magna	Crustacean	-4.67804	Blinova et al. / Environmental Pollution 158 (2010) 41–4744
ZnO	70	48 h	EC50	2.8	3.45679e-05	daphnia magna	Crustacean	-4.46133	Blinova et al. / Environmental Pollution 158 (2010) 41–4744
ZnO	70	48 h	EC50	3.3	4.07407e-05	daphnia magna	Crustacean	-4.38997	Blinova et al. / Environmental Pollution 158 (2010) 41–4744
ZnO	70	48 h	EC50	3.4	4.19753e-05	daphnia magna	Crustacean	-4.37701	Blinova et al. / Environmental Pollution 158 (2010) 41–4744
ZnO	70	48 h	EC50	3.5	4.32099e-05	daphnia magna	Crustacean	-4.36442	Blinova et al. / Environmental Pollution 158 (2010) 41–4744
ZnO	70	48 h	EC50	9	0.000111111	daphnia magna	Crustacean	-3.95424	Blinova et al. / Environmental Pollution 158 (2010) 41–4744
ZnO	70	24 h	EC50	9.4	0.000116049	Tetrahymena thermophila	Eukaryotes & Microalgae	-3.93536	Blinova et al. / Environmental Pollution 158 (2010) 41–4744
ZnO	70	24 h	EC50	12.4	0.000153086	Tetrahymena thermophila	Eukaryotes & Microalgae	-3.81506	Blinova et al. / Environmental Pollution 158 (2010) 41–4744
ZnO	70	24 h	EC50	16.4	0.000202469	Tetrahymena thermophila	Eukaryotes & Microalgae	-3.69364	Blinova et al. / Environmental Pollution 158 (2010) 41–4744
ZnO	70	24 h	EC50	26.5	0.00032716	Tetrahymena thermophila	Eukaryotes & Microalgae	-3.48524	Blinova et al. / Environmental Pollution 158 (2010) 41–4744
ZnO	13.6	48 h	ec50	1.87	2.30864e-05	Daphnia magna	Crustacean	-4.63664	Bondarenko et al. Nanotoxicology, 2016; 10(9): 1229–1242
ZnO	13.6	24 h	ec50	1.9	2.34568e-05	human mesenchymal stem cells	Human cells	-4.62973	Bondarenko et al. Nanotoxicology, 2016; 10(9): 1229–1242
ZnO	13.6	24 h	ec50	3.9	4.81481e-05	Tetrahymena thermophila	Eukaryotes & Microalgae	-4.31742	Bondarenko et al. Nanotoxicology, 2016; 10(9): 1229–1242
ZnO	13.6	48 h	ec50	6.9	8.51852e-05	murine Fibroblasts (membrane integrity)	Mammalian cells	-4.06964	Bondarenko et al. Nanotoxicology, 2016; 10(9): 1229–1242
ZnO	13.6	30 min	ec50	8.3	0.000102469	Vibrio fischeri	Bacteria	-3.98941	Bondarenko et al. Nanotoxicology, 2016; 10(9): 1229–1242
ZnO	13.6	24 h	ec50	9.1	0.000112346	murine Fibroblasts BALB/c 3t3	Mammalian cells	-3.94944	Bondarenko et al. Nanotoxicology, 2016; 10(9): 1229–1242
ZnO	13.6	4 h	ec50	14	0.00017284	Bacillus subtilis	Bacteria	-3.76236	Bondarenko et al. Nanotoxicology, 2016; 10(9): 1229–1242
ZnO	13.6	4 h	ec50	16	0.000197531	Staphylococcus aureus	Bacteria	-3.70437	Bondarenko et al. Nanotoxicology, 2016; 10(9): 1229–1242
ZnO	13.6	24 h	ec50	16.3	0.000201235	human mesenchymal stem cells (MTT)	Human cells	-3.6963	Bondarenko et al. Nanotoxicology, 2016; 10(9): 1229–1242
ZnO	13.6	4 h	ec50	67	0.00082716	Escherichia Coli	Bacteria	-3.08241	Bondarenko et al. Nanotoxicology, 2016; 10(9): 1229–1242
ZnO	13.6	4 h	ec50	69	0.000851852	Pseudomonas putida	Bacteria	-3.06964	Bondarenko et al. Nanotoxicology, 2016; 10(9): 1229–1242
ZnO	39.05	24 h	EC50	131.367	0.00162181	A549 cells	Human cells	-2.79	Cao et al. Green Chem., 2020,22, 3512-3521
ZnO	71	30 min	LC50	0.13	1.60494e-06	Escherichia Coli	Bacteria	-5.79454	Dasari et al. J Environ Sci, 2013;25(5):882-8
ZnO	100	48 h	IC50	20	0.000246914	HEK293	Human cells	-3.60746	Dua et al., 2011,Bull. Korean Chem. Soc. Vol. 32, No. 6 2051
ZnO	100	24 h	IC50	21.47	0.000265062	HEK293	Human cells	-3.57665	Dua et al., 2011,Bull. Korean Chem. Soc. Vol. 32, No. 6 2051
ZnO	71	24 h	LC50	39	0.000481481	Hacat cells	Human cells	-3.31742	Gajewicz et al. Nanotoxicology, 2015;9(3):313-25
ZnO	14	24 h	ec50	100	0.00123457	RTgutGC	Fish	-2.90849	Geppert et al. Environ. Sci.: Nano, 2021,8, 2249-2260
ZnO	50-70	24 h	LC50	0.18	2.22222e-06	Thamnocephalus platyurus	Crustacean	-5.65321	Heinlaan et al. Chemosphere 2008; 71 (7) 1308-1316
ZnO	50-70	48 h	LC50	3.2	3.95062e-05	Daphnia magna (neonates)	Crustacean	-4.40334	Heinlaan et al. Chemosphere 2008; 71 (7) 1308-1316
ZnO	50-70	30 min	EC50	1.9	2.34568e-05	Vibrio fischeri	Bacteria	-4.62973	Heinlaan et al. Chemosphere 2008; 71 (7) 1308-1316
ZnO	21	24 h	ec50	100	0.00123457	A549	Human cells	-2.90849	Horie et al. Metallomics, 2012, 4, 350–360
ZnO	21	24 h	ec50	100	0.00123457	A549	Human cells	-2.90849	Horie et al. Metallomics, 2012, 4, 350–360
ZnO	21	24 h	ec50	100	0.00123457	Hacat	Human cells	-2.90849	Horie et al. Metallomics, 2012, 4, 350–360
ZnO	21	24 h	ec50	100	0.00123457	Hacat	Human cells	-2.90849	Horie et al. Metallomics, 2012, 4, 350–360
ZnO	30-40	2 h	LD50	21.1	0.000260494	E.coli	Bacteria	-3.5842	Hu et al. Sci. Total Environ. 407 (2009) 3070–3072
ZnO	20	24 h	EC50	12.5	0.000154321	BEAS-2B	Human cells	-3.81158	Huang et al. Materials 2010, 3, 4842-4859;
ZnO	25-70	2 h	ec50	5.54	6.83951e-05	E. coli AS391	Bacteria	-4.16498	Ivansk et al Anal Bioanal Chem (2010) 398:701–716
ZnO	25-70	2 h	ec50	6.91	8.53086e-05	E. coli JI132	Bacteria	-4.06901	Ivansk et al Anal Bioanal Chem (2010) 398:701–716
ZnO	25-70	30 min	ec50	13.4	0.000165432	E. coli AS391	Bacteria	-3.78138	Ivansk et al Anal Bioanal Chem (2010) 398:701–716
ZnO	25-70	30 min	ec50	22.6	0.000279012	E. coli JI132	Bacteria	-3.55438	Ivansk et al Anal Bioanal Chem (2010) 398:701–716
ZnO	25-70	2 h	ec50	67.2	0.00082963	E. coli AB1157	Bacteria	-3.08112	Ivansk et al Anal Bioanal Chem (2010) 398:701–716
ZnO	25-70	2 h	ec50	82.4	0.00101728	E. coli JI131	Bacteria	-2.99256	Ivansk et al Anal Bioanal Chem (2010) 398:701–716
ZnO	25-70	2 h	ec50	86.8	0.0010716	E. coli AS393	Bacteria	-2.96997	Ivansk et al Anal Bioanal Chem (2010) 398:701–716
ZnO	25-70	2 h	ec50	89.1	0.0011	E. coli JI130	Bacteria	-2.95861	Ivansk et al Anal Bioanal Chem (2010) 398:701–716
ZnO	25-70	30 min	ec50	171	0.00211111	E. coli AS393	Bacteria	-2.67549	Ivansk et al Anal Bioanal Chem (2010) 398:701–716
ZnO	25-70	30 min	ec50	183	0.00225926	E. coli AB1157	Bacteria	-2.64603	Ivansk et al Anal Bioanal Chem (2010) 398:701–716
ZnO	25-70	30 min	ec50	196	0.00241975	E. coli JI131	Bacteria	-2.61623	Ivansk et al Anal Bioanal Chem (2010) 398:701–716
ZnO	25-70	30 min	ec50	234	0.00288889	E. coli JI130	Bacteria	-2.53927	Ivansk et al Anal Bioanal Chem (2010) 398:701–716
ZnO	19.7	24 h	IC50	12.1	0.000149383	Balb/c	Mammalian cells	-3.8257	Ivansk et al. Curr Top Med Chem., 2015;15(18):1914-29
ZnO	19.7	24 h	IC50	24.9	0.000307407	A549	Human cells	-3.51229	Ivansk et al. Curr Top Med Chem., 2015;15(18):1914-29
ZnO	19.7	24 h	IC50	30.2	0.00037284	Caco2	Human cells	-3.42848	Ivansk et al. Curr Top Med Chem., 2015;15(18):1914-29
ZnO	50-70	12 h	EC50	50	0.00246914	Neuro 2A cells	Mammalian cells	-2.60746	Jeng et al. ron Sci Health A Tox Hazard Subst Environ Eng. 2006;41(12):2699-711
ZnO	16.5	24 h	EC50	81	0.001	A549 CELLS	Human cells	-3	Jeong et al. Front Pharmacol. 2018 22;9:15.
ZnO	16.5	24 h	EC50	97.2	0.0012	THP-1 CELLS	Human cells	-2.92082	Jeong et al. Front Pharmacol. 2018 22;9:15.
ZnO	50-70	8 h	EC50	121	0.00149383	Saccharomyces cerevisiae S288C	Eukaryotes & Microalgae	-2.8257	Kasemets et al. Toxicol. In Vitro 2009; 23 (6) 1116-1122
ZnO	50-70	24 h	EC50	131	0.00161728	Saccharomyces cerevisiae S288C	Eukaryotes & Microalgae	-2.79121	Kasemets et al. Toxicol. In Vitro 2009; 23 (6) 1116-1122
ZnO	<130	24 h	LC50	12.7	0.000165568	gill cells	Fish	-3.78102	Katsumiti et al. Nanotoxicology. 2016;10(2):185-93
ZnO	<130	24 h	LC50	13.411	0.000165568	hemocytes	other	-3.78102	Katsumiti et al. Nanotoxicology. 2016;10(2):185-93
ZnO	<280	24 h	LC50	38.296	0.000487457	gill cells	Fish	-3.31206	Katsumiti et al. Nanotoxicology. 2016;10(2):185-93
ZnO	<280	24 h	LC50	39.484	0.000487457	hemocytes	other	-3.31206	Katsumiti et al. Nanotoxicology. 2016;10(2):185-93
ZnO	30-70	24 h	LC50	3.87	4.77778e-05	hemocytes	other	-4.32077	Katsumiti et al. Nanotoxicology. 2016;10(2):185-93
ZnO	30-70	24 h	LC50	4.04	4.77778e-05	gill cells	Fish	-4.32077	Katsumiti et al. Nanotoxicology. 2016;10(2):185-93
ZnO	22.6	24 h	IC50	33	0.000407407	E.coli	Bacteria	-3.38997	Kaweeteerawat et al. Environ. Sci. Technol. 2015, 49, 1105−1112
ZnO	-	1.5 h	EC50	1.1	1.35802e-05	E.coli	Bacteria	-4.86709	Ko et al. Appl Microbiol Biotechnol (2014) 98:3295–3303
ZnO	-	3 days	EC50	10.84	0.000133827	Lactuca sativa L.	Plants	-3.87346	Ko et al. Appl Microbiol Biotechnol (2014) 98:3295–3303
ZnO	-	3 days	EC50	46.54	0.000574568	Raphanus sativus L	Plants	-3.24066	Ko et al. Appl Microbiol Biotechnol (2014) 98:3295–3303
ZnO	40-100	4 days	EC50	0.5	6.17284e-06	Lactuca sativa L.	Plants	-5.20952	Kong et al. Nanomaterials 2021, 11, 1653
ZnO	40-100	4 days	EC50	1.23	1.51852e-05	Raphanus sativus	Plants	-4.81858	Kong et al. Nanomaterials 2021, 11, 1653
ZnO	40-100	4 days	EC50	1.31	1.61728e-05	Lactuca sativa L.	Plants	-4.79121	Kong et al. Nanomaterials 2021, 11, 1653
ZnO	<130	120 h	LC50	4.289	5.29506e-05	Danio rerio embryos	Fish	-4.27613	Lacave et al. Nanotechnology 27 (2016) 325102
ZnO	<180	120 h	LC50	5.538	6.83704e-05	Danio rerio embryos	Fish	-4.16513	Lacave et al. Nanotechnology 27 (2016) 325102
ZnO	53.6	24 h	IC50	1.66	2.04938e-05	THP-1	Human cells	-4.68838	Lanone et al. Particle and Fibre Toxicology 2009, 6, 14
ZnO	53.6	24 h	IC50	4.05	5e-05	THP-1	Human cells	-4.30103	Lanone et al. Particle and Fibre Toxicology 2009, 6, 14
ZnO	53.6	24 h	IC50	34.31	0.00042358	a549	Human cells	-3.37306	Lanone et al. Particle and Fibre Toxicology 2009, 6, 14
ZnO	53.6	24 h	IC50	66.17	0.000816914	a549	Human cells	-3.08782	Lanone et al. Particle and Fibre Toxicology 2009, 6, 14
ZnO	53.6	24 h	IC50	2.08	2.5679e-05	THP-1	Human cells	-4.59042	Lanone et al. Particle and Fibre Toxicology 2009, 6, 14
ZnO	53.6	24 h	IC50	81.22	0.00100272	THP-1	Human cells	-2.99882	Lanone et al. Particle and Fibre Toxicology 2009, 6, 14
ZnO	9.8	48 h	LC50	573.8	0.00708395	P. multimicronucleatum	Eukaryotes & Microalgae	-2.14972	Li et al. 2012, Chem. Res. Toxicol, 25, 1675−1681
ZnO	20	2 h	IC50	20	0.000246914	Brassica napus	Plant	-3.60746	Lin et al. Environm. Pollut. 2007 150 (2) 243-250
ZnO	20	2 h	IC50	20	0.000246914	Lolium perenne	Plants	-3.60746	Lin et al. Environm. Pollut. 2007 150 (2) 243-250
ZnO	20	2 h	IC50	50	0.000617284	Raphanus sativus	Plants	-3.20952	Lin et al. Environm. Pollut. 2007 150 (2) 243-250
ZnO	-	48 h	LD 50	75	0.000925926	A549	Human cells	-3.03342	Lozano et al 2011 J. Phys.: Conf. Ser. 304 012046
ZnO	-	48 h	LD 50	100	0.00123457	SK- MES 1	Human cells	-2.90849	Lozano et al 2011 J. Phys.: Conf. Ser. 304 012046
ZnO	-	24 h	LD 50	125	0.00154321	HeLa cells	Human cells	-2.81158	Lozano et al 2011 J. Phys.: Conf. Ser. 304 012046
ZnO	-	48 h	LD 50	125	0.00154321	HeLa cells	Human cells	-2.81158	Lozano et al 2011 J. Phys.: Conf. Ser. 304 012046
ZnO	-	48 h	LD 50	150	0.00185185	NCl H460	Human cells	-2.73239	Lozano et al 2011 J. Phys.: Conf. Ser. 304 012046
ZnO	-	24 h	LD 50	200	0.00246914	SK- MES 1	Human cells	-2.60746	Lozano et al 2011 J. Phys.: Conf. Ser. 304 012046
ZnO	-	24 h	LD 50	250	0.00308642	A549	Human cells	-2.51055	Lozano et al 2011 J. Phys.: Conf. Ser. 304 012046
ZnO	-	24 h	LD 50	250	0.00308642	NCl H460	Human cells	-2.51055	Lozano et al 2011 J. Phys.: Conf. Ser. 304 012046
ZnO	50-70	30 min	ec50	4.8	5.92593e-05	Vibrio fischieri	Bacteria	-4.22724	Mortimer et al. Toxicology in Vitro 22 (2008) 1412–1417
ZnO	71	30 min	LC50	0.128376	1.58489e-06	E.coli	Bacteria	-5.8	Pathakoti et al. Journal of Photochemistry and Photobiology B: Biology 130 (2014) 234–240
ZnO	15-90	2 h	EC50	28.7399	0.000354813	E.coli	Bacteria	-3.45	Puzyn et al. Nature Nanotech 6, 175–178 (2011)
ZnO	>50	24 h	IC50	60	0.000740741	A549	Human cells	-3.13033	Seiffert et al., 2012,Chem. Res. Toxicol., 25, 140–152
ZnO	>50	24 h	IC50	60	0.000740741	A549	Human cells	-3.13033	Seiffert et al., 2012,Chem. Res. Toxicol., 25, 140–152
ZnO	>50	24 h	IC50	60	0.000740741	A549	Human cells	-3.13033	Seiffert et al., 2012,Chem. Res. Toxicol., 25, 140–152
ZnO	>50	24 h	IC50	60	0.000740741	A549	Human cells	-3.13033	Seiffert et al., 2012,Chem. Res. Toxicol., 25, 140–152
ZnO	>50	24 h	IC50	60	0.000740741	A549	Human cells	-3.13033	Seiffert et al., 2012,Chem. Res. Toxicol., 25, 140–152
ZnO	<100	48 h	EC50	2.6	3.20988e-05	Daphnia magna	Crustacean	-4.49351	Sovova et al., 2009, Proceedings,NANOCON Conference, Roznov , Czech Republic, pp 62‐71,
ZnO	<100	30 min	EC50	7.276	8.98272e-05	Vibrio fischeri	Bacteria	-4.04659	Sovova et al., 2009, Proceedings,NANOCON Conference, Roznov , Czech Republic, pp 62‐71,
ZnO	-	24 h	ec50	11.2	0.000138272	Balb/c 3T3	Mammalian cells	-3.85927	Titma et al. Cytotechnology. 2016;68(6):2363-2377
ZnO	-	216	ec50	41.1	0.000507407	A549	Human cells	-3.29464	Titma et al. Cytotechnology. 2016;68(6):2363-2377
ZnO	-	36 h	ec50	42.8	0.000528395	A549	Human cells	-3.27704	Titma et al. Cytotechnology. 2016;68(6):2363-2377
ZnO	-	60 h	ec50	46	0.000567901	A549	Human cells	-3.24573	Titma et al. Cytotechnology. 2016;68(6):2363-2377
ZnO	-	108	ec50	46.8	0.000577778	A549	Human cells	-3.23824	Titma et al. Cytotechnology. 2016;68(6):2363-2377
ZnO	-	60 h	ec50	52.4	0.000646914	Caco2	Human cells	-3.18915	Titma et al. Cytotechnology. 2016;68(6):2363-2377
ZnO	-	216	ec50	61.2	0.000755556	Caco2	Human cells	-3.12173	Titma et al. Cytotechnology. 2016;68(6):2363-2377
ZnO	-	108	ec50	62.5	0.000771605	Caco2	Human cells	-3.11261	Titma et al. Cytotechnology. 2016;68(6):2363-2377
ZnO	-	36 h	ec50	65.9	0.00081358	Caco2	Human cells	-3.0896	Titma et al. Cytotechnology. 2016;68(6):2363-2377
ZnO	-	12 h	ec50	117.6	0.00145185	A549	Human cells	-2.83808	Titma et al. Cytotechnology. 2016;68(6):2363-2377
ZnO	8.35	4 days	LC50	3.5	4.32099e-05	Danio rerio (embryos)	Fish	-4.36442	Wehmas et al. Toxicology Reports 2 (2015) 702–717
ZnO	8.35	5 days	LC50	9.1	0.000112346	Danio rerio (embryos)	Fish	-3.94944	Wehmas et al. Toxicology Reports 2 (2015) 702–717
ZnO	18	96 h	EC50	1.34	1.65432e-05	Soil bacterial community	Bacteria	-4.78138	Y. Zhai et al. Ecotoxicology and Environmental Safety 145 (2017) 349–358
ZnO	43	96 h	EC50	1.51	1.8642e-05	Soil bacterial community	Bacteria	-4.72951	Y. Zhai et al. Ecotoxicology and Environmental Safety 145 (2017) 349–358
ZnO	150	96 h	EC50	1.65	2.03704e-05	Soil bacterial community	Bacteria	-4.691	Y. Zhai et al. Ecotoxicology and Environmental Safety 145 (2017) 349–358
ZnO	22.6	24 h	EC50	3.63078	4.48245e-05	BEAS-2B cells, ATP assay	Human cells	-4.34849	Zhang et al. ACS Nano 2012, 6, 5, 4349–4368
ZnO	22.6	24 h	EC50	5.24807	6.4791e-05	BEAS-2B cells, MTS assay	Human cells	-4.18849	Zhang et al. ACS Nano 2012, 6, 5, 4349–4368
ZnO	22.6	24 h	EC50	8.12831	0.000100349	RAW 2647 cells, ATP assay	Mammalian cells	-3.99849	Zhang et al. ACS Nano 2012, 6, 5, 4349–4368
ZnO	22.6	24 h	EC50	17.378	0.000214543	RAW 2647 cells, MTS assay	Mammalian cells	-3.66849	Zhang et al. ACS Nano 2012, 6, 5, 4349–4368
ZnO	40	15 min	EC50	11.6	0.00014321	Vibrio Fischeri	Bacteria	-3.84403	Zhang et al. Environ Monit Assess (2020) 192: 484
ZnO	20	48 h	EC50	3.13	3.8642e-05	Saccharomyces cerevisae	Eukaryotes & Microalgae	-4.41294	Zhang et al., J Nanopart Res (2016) 18 (2), 372
ZnO	20	6 h	EC50	8.83	0.000109012	Saccharomyces cerevisae	Eukaryotes & Microalgae	-3.96252	Zhang et al., J Nanopart Res (2016) 18 (2), 372
ZnO	20	96 h	LC50	1.78401	2.20249e-05	Danio rerio (embryos)	Fish	-4.65709	Zhu et al., J. Environ. Sci. Health A Tox. Hazard Subst. Environ. Eng. 2008; 43 (3) 278-284
ZnO	20	84 h	eC50	2.05465	2.53661e-05	Danio rerio (embryos)	Fish	-4.59575	Zhu et al., J. Environ. Sci. Health A Tox. Hazard Subst. Environ. Eng. 2008; 43 (3) 278-284
ZnO	20	48 h	LC50	1.50343	1.85608e-05	Daphnia magna (neonates)	Crustacean	-4.7314	Zhu et al., J. Nanopart. Res. 2009; 11 (1) 67–75
ZnO	20	48 h	EC50	0.618883	7.64053e-06	Daphnia magna (neonates)	Crustacean	-5.11688	Zhu et al., J. Nanopart. Res. 2009; 11 (1) 67–75
ZrO2	20-30	10 h	IC50	1000	0.00813008	Saccharomyces cerevisae	Eukaryotes & Microalgae	-2.08991	Otero-González et al. / Chemosphere 93 (2013) 1201–1206
ZrO2	20-30	10 h	IC50	1000	0.00813008	Saccharomyces cerevisae	Eukaryotes & Microalgae	-2.08991	Otero-González et al. / Chemosphere 93 (2013) 1201–1206
ZrO2	20-30	10 h	EC50	1000	0.00813008	Saccharomyces cerevisae	Eukaryotes & Microalgae	-2.08991	Otero-González et al. / Chemosphere 93 (2013) 1201–1206
ZrO2	19.87	24 h	EC50	1202	0.00977237	A549 cells	Human cells	-2.01	Cao et al. Green Chem., 2020,22, 3512-3521
ZrO2	46.7	24 h	LC50	1188	0.00965854	Hacat cells	Human cells	-2.01509	Gajewicz et al. Nanotoxicology, 2015;9(3):313-25
ZrO2	20-30	24 h	ec50	1000	0.00813008	A549	Human cells	-2.08991	Horie et al. Metallomics, 2012, 4, 350–360
ZrO2	20-30	24 h	ec50	1000	0.00813008	Hacat	Human cells	-2.08991	Horie et al. Metallomics, 2012, 4, 350–360
ZrO2	40.1	24 h	IC50	500	0.00406504	E.coli	Bacteria	-2.39094	Kaweeteerawat et al. Environ. Sci. Technol. 2015, 49, 1105−1112
ZrO2	32	24 h	IC50	82.88	0.000673821	a549	Human cells	-3.17146	Lanone et al. Particle and Fibre Toxicology 2009, 6, 14
ZrO2	32	24 h	IC50	570.6	0.00463902	THP-1	Human cells	-2.33357	Lanone et al. Particle and Fibre Toxicology 2009, 6, 14
ZrO2	32	24 h	IC50	911.2	0.00740813	a549	Human cells	-2.13029	Lanone et al. Particle and Fibre Toxicology 2009, 6, 14
ZrO2	27	30 min	LC50	323.523	0.00263027	E.coli	Bacteria	-2.58	Pathakoti et al. Journal of Photochemistry and Photobiology B: Biology 130 (2014) 234–240
ZrO2	15-90	2 h	EC50	870.773	0.00707946	E.coli	Bacteria	-2.15	Puzyn et al. Nature Nanotech 6, 175–178 (2011)
ZrO2	40.1	24 h	EC50	>200	#VALUE!	BEAS-2B cells, ATP assay	Human cells	#VALUE!	Zhang et al. ACS Nano 2012, 6, 5, 4349–4368
ZrO2	40.1	24 h	EC50	>200	#VALUE!	BEAS-2B cells, MTS assay	Human cells	#VALUE!	Zhang et al. ACS Nano 2012, 6, 5, 4349–4368
ZrO2	40.1	24 h	EC50	>200	#VALUE!	RAW 2647 cells, ATP assay	Mammalian cells	#VALUE!	Zhang et al. ACS Nano 2012, 6, 5, 4349–4368
ZrO2	40.1	24 h	EC50	>200	#VALUE!	RAW 2647 cells, MTS assay	Mammalian cells	#VALUE!	Zhang et al. ACS Nano 2012, 6, 5, 4349–4368

## Sheet: Bacteria
NP	Size	Exposure time	Endpoint	Value (mg/l	Value(mol/L)	Cell type	Cell group	Log(endpoint)	reference
Ag	20.4	4 h	ec50	4.5	4.16667e-05	Bacillus subtilis	Bacteria	-4.38021	Bondarenko et al. Nanotoxicology, 2016; 10(9): 1229–1242
Ag	<100	2 h	ec50	45.9	0.000425	E. coli AB1157	Bacteria	-3.37161	Ivansk et al Anal Bioanal Chem (2010) 398:701–716
Ag	<100	30 min	ec50	571	0.00528704	E. coli AB1157	Bacteria	-2.27679	Ivansk et al Anal Bioanal Chem (2010) 398:701–716
Ag	<100	2 h	ec50	3.11	2.87963e-05	E. coli AS391	Bacteria	-4.54066	Ivansk et al Anal Bioanal Chem (2010) 398:701–716
Ag	<100	30 min	ec50	5.8	5.37037e-05	E. coli AS391	Bacteria	-4.27	Ivansk et al Anal Bioanal Chem (2010) 398:701–716
Ag	<100	2 h	ec50	19.7	0.000182407	E. coli AS393	Bacteria	-3.73896	Ivansk et al Anal Bioanal Chem (2010) 398:701–716
Ag	<100	30 min	ec50	329	0.0030463	E. coli AS393	Bacteria	-2.51623	Ivansk et al Anal Bioanal Chem (2010) 398:701–716
Ag	<100	2 h	ec50	30.9	0.000286111	E. coli JI130	Bacteria	-3.54347	Ivansk et al Anal Bioanal Chem (2010) 398:701–716
Ag	<100	30 min	ec50	331	0.00306481	E. coli JI130	Bacteria	-2.5136	Ivansk et al Anal Bioanal Chem (2010) 398:701–716
Ag	<100	2 h	ec50	18.8	0.000174074	E. coli JI131	Bacteria	-3.75927	Ivansk et al Anal Bioanal Chem (2010) 398:701–716
Ag	<100	30 min	ec50	485	0.00449074	E. coli JI131	Bacteria	-2.34768	Ivansk et al Anal Bioanal Chem (2010) 398:701–716
Ag	<100	2 h	ec50	3.79	3.50926e-05	E. coli JI132	Bacteria	-4.45478	Ivansk et al Anal Bioanal Chem (2010) 398:701–716
Ag	<100	30 min	ec50	17.9	0.000165741	E. coli JI132	Bacteria	-3.78057	Ivansk et al Anal Bioanal Chem (2010) 398:701–716
Ag	20.4	4 h	ec50	3.1	2.87037e-05	Escherichia Coli	Bacteria	-4.54206	Bondarenko et al. Nanotoxicology, 2016; 10(9): 1229–1242
Ag	20.4	4 h	ec50	3.2	2.96296e-05	Pseudomonas aeruginosa	Bacteria	-4.52827	Bondarenko et al. Nanotoxicology, 2016; 10(9): 1229–1242
Ag	20.4	4 h	ec50	3.8	3.51852e-05	Pseudomonas putida	Bacteria	-4.45364	Bondarenko et al. Nanotoxicology, 2016; 10(9): 1229–1242
Ag	20.4	4 h	ec50	5.2	4.81481e-05	Staphylococcus aureus	Bacteria	-4.31742	Bondarenko et al. Nanotoxicology, 2016; 10(9): 1229–1242
Ag	20.4	30 min	ec50	2.9	2.68519e-05	Vibrio fischeri	Bacteria	-4.57103	Bondarenko et al. Nanotoxicology, 2016; 10(9): 1229–1242
Ag2O	-	16 h	IC50	18	7.72532e-05	B. aerius	Bacteria	-4.11208	Negi et al. J Gen Appl Microbiol. 2013;59(1):83-8
Ag2O	-	16 h	IC50	18	7.72532e-05	B. circulans	Bacteria	-4.11208	Negi et al. J Gen Appl Microbiol. 2013;59(1):83-8
Ag2O	-	16 h	IC50	9	3.86266e-05	E.coli	Bacteria	-4.41311	Negi et al. J Gen Appl Microbiol. 2013;59(1):83-8
Ag2O	-	16 h	IC50	9	3.86266e-05	P. aeruginosa	Bacteria	-4.41311	Negi et al. J Gen Appl Microbiol. 2013;59(1):83-8
Al2O3	30-40	2 h	LD50	326.1	0.00319706	E.coli	Bacteria	-2.49525	Hu et al. Sci. Total Environ. 407 (2009) 3070–3072
Al2O3	14.7	24 h	IC50	500	0.00490196	E.coli	Bacteria	-2.30963	Kaweeteerawat et al. Environ. Sci. Technol. 2015, 49, 1105−1112
Al2O3	55	30 min	LC50	387.793	0.00380189	E.coli	Bacteria	-2.42	Pathakoti et al. Journal of Photochemistry and Photobiology B: Biology 130 (2014) 234–240
Al2O3	15-90	2 h	EC50	330.066	0.00323594	E.coli	Bacteria	-2.49	Puzyn et al. Nature Nanotech 6, 175–178 (2011)
Bi2O3	144	30 min	LC50	131.337	0.000281838	E.coli	Bacteria	-3.55	Pathakoti et al. Journal of Photochemistry and Photobiology B: Biology 130 (2014) 234–240
Bi2O3	15-90	2 h	EC50	705.32	0.00151356	E.coli	Bacteria	-2.82	Puzyn et al. Nature Nanotech 6, 175–178 (2011)
CeO2	25	2 h	ec50	64.05	0.000372384	E Coli	Bacteria	-3.42901	Kar et al. Chemosphere 264 (2021) 128428
CeO2	18.3	24 h	IC50	>500	#VALUE!	E.coli	Bacteria	#VALUE!	Kaweeteerawat et al. Environ. Sci. Technol. 2015, 49, 1105−1112
Co2O3	<100	2 h	ec50	77.145	0.000464729	E Coli	Bacteria	-3.3328	Kar et al. Chemosphere 264 (2021) 128428
Co3O4	51-132	2 h	ec50	240	0.000995851	E Coli	Bacteria	-3.00181	Kar et al. Chemosphere 264 (2021) 128428
Co3O4	10	24 h	IC50	138	0.000572614	E.coli	Bacteria	-3.24214	Kaweeteerawat et al. Environ. Sci. Technol. 2015, 49, 1105−1112
Co3O4	78.3	30 min	LC50	55.56	0.000230539	Escherichia Coli	Bacteria	-3.63725	Dasari et al. J Environ Sci, 2013;25(5):882-8
CoO	71.8	24 h	IC50	43	0.000573333	E.coli	Bacteria	-3.24159	Kaweeteerawat et al. Environ. Sci. Technol. 2015, 49, 1105−1112
CoO	55	30 min	LC50	55.5983	0.00074131	E.coli	Bacteria	-3.13	Pathakoti et al. Journal of Photochemistry and Photobiology B: Biology 130 (2014) 234–240
CoO	15-90	2 h	EC50	23.1772	0.00030903	E.coli	Bacteria	-3.51	Puzyn et al. Nature Nanotech 6, 175–178 (2011)
Cr2O3	193	24 h	IC50	232	0.00152632	E.coli	Bacteria	-2.81636	Kaweeteerawat et al. Environ. Sci. Technol. 2015, 49, 1105−1112
Cr2O3	47	30 min	LC50	1323.86	0.00870964	E.coli	Bacteria	-2.06	Pathakoti et al. Journal of Photochemistry and Photobiology B: Biology 130 (2014) 234–240
Cr2O3	15-90	2 h	EC50	469.725	0.0030903	E.coli	Bacteria	-2.51	Puzyn et al. Nature Nanotech 6, 175–178 (2011)
Cu	25	96 h	EC50	0.3	4.6875e-06	Soil bacterial community	Bacteria	-5.32906	Y. Zhai et al. Ecotoxicology and Environmental Safety 145 (2017) 349–361
Cu	50	96 h	EC50	0.38	5.9375e-06	Soil bacterial community	Bacteria	-5.2264	Y. Zhai et al. Ecotoxicology and Environmental Safety 145 (2017) 349–362
Cu	78	96 h	EC50	0.57	8.90625e-06	Soil bacterial community	Bacteria	-5.05031	Y. Zhai et al. Ecotoxicology and Environmental Safety 145 (2017) 349–363
Cu	100	96 h	EC50	0.54	8.4375e-06	Soil bacterial community	Bacteria	-5.07379	Y. Zhai et al. Ecotoxicology and Environmental Safety 145 (2017) 349–364
Cu	40	15 min	EC50	4.1	6.40625e-05	Vibrio Fischeri	Bacteria	-4.1934	Zhang et al. Environ Monit Assess (2020) 192: 484
CuO	30	2 h	ec50	10.1	0.000126972	E. coli AB1157	Bacteria	-3.89629	Ivansk et al Anal Bioanal Chem (2010) 398:701–716
CuO	30	30 min	ec50	50.5	0.000634861	E. coli AB1157	Bacteria	-3.19732	Ivansk et al Anal Bioanal Chem (2010) 398:701–716
CuO	30	2 h	ec50	2.53	3.18059e-05	E. coli AS391	Bacteria	-4.49749	Ivansk et al Anal Bioanal Chem (2010) 398:701–716
CuO	30	30 min	ec50	11.4	0.000143315	E. coli AS391	Bacteria	-3.84371	Ivansk et al Anal Bioanal Chem (2010) 398:701–716
CuO	30	2 h	ec50	9.85	0.000123829	E. coli AS393	Bacteria	-3.90718	Ivansk et al Anal Bioanal Chem (2010) 398:701–716
CuO	30	30 min	ec50	47.6	0.000598403	E. coli AS393	Bacteria	-3.22301	Ivansk et al Anal Bioanal Chem (2010) 398:701–716
CuO	30	2 h	ec50	6.73	8.46062e-05	E. coli JI130	Bacteria	-4.0726	Ivansk et al Anal Bioanal Chem (2010) 398:701–716
CuO	30	30 min	ec50	39.7	0.000499089	E. coli JI130	Bacteria	-3.30182	Ivansk et al Anal Bioanal Chem (2010) 398:701–716
CuO	30	2 h	ec50	7.45	9.36577e-05	E. coli JI131	Bacteria	-4.02846	Ivansk et al Anal Bioanal Chem (2010) 398:701–716
CuO	30	30 min	ec50	33	0.00041486	E. coli JI131	Bacteria	-3.3821	Ivansk et al Anal Bioanal Chem (2010) 398:701–716
CuO	30	2 h	ec50	3.25	4.08574e-05	E. coli JI132	Bacteria	-4.38873	Ivansk et al Anal Bioanal Chem (2010) 398:701–716
CuO	30	30 min	ec50	14.8	0.000186058	E. coli JI132	Bacteria	-3.73035	Ivansk et al Anal Bioanal Chem (2010) 398:701–716
CuO	30-40	2 h	LD50	64.5	0.00080625	E.coli	Bacteria	-3.09353	Hu et al. Sci. Total Environ. 407 (2009) 3070–3072
CuO	12.8	24 h	IC50	39	0.000490289	E.coli	Bacteria	-3.30955	Kaweeteerawat et al. Environ. Sci. Technol. 2015, 49, 1105−1112
CuO	30-50	1.5 h	EC50	54.01	0.000678987	E.coli	Bacteria	-3.16814	Ko et al. Appl Microbiol Biotechnol (2014) 98:3295–3303
CuO	28	30 min	LC50	4.57734	5.7544e-05	E.coli	Bacteria	-4.24	Pathakoti et al. Journal of Photochemistry and Photobiology B: Biology 130 (2014) 234–240
CuO	15-90	2 h	EC50	50.1895	0.000630957	E.coli	Bacteria	-3.2	Puzyn et al. Nature Nanotech 6, 175–178 (2011)
CuO	28	30 min	LC50	4.63	5.8206e-05	Escherichia Coli	Bacteria	-4.23503	Dasari et al. J Environ Sci, 2013;25(5):882-8
CuO	13.1	30 min	EC50	1.78	2.225e-05	Vibrio Fischeri	Bacteria	-4.65267	Aruoja et al Environ. Sci.: Nano, 2015,2, 630-644
CuO	24.5	30 min	ec50	3.4	4.27431e-05	Vibrio fischeri	Bacteria	-4.36913	Bondarenko et al. Nanotoxicology, 2016; 10(9): 1229–1242
CuO	30	30 min	EC50	79	0.0009875	Vibrio fischeri	Bacteria	-3.00546	Heinlaan et al. Chemosphere 2008; 71 (7) 1308-1316
CuO	<50	30 min	EC50	12.2	0.000153372	Vibrio fischeri	Bacteria	-3.81425	Sovova et al., 2009, Proceedings,NANOCON Conference, Roznov , Czech Republic, pp 62‐71,
CuO	40	15 min	EC50	118.7	0.00149224	Vibrio Fischeri	Bacteria	-2.82616	Zhang et al. Environ Monit Assess (2020) 192: 484
CuO	30	30 min	ec50	68.1	0.000856119	Vibrio fischieri	Bacteria	-3.06747	Mortimer et al. Toxicology in Vitro 22 (2008) 1412–1417
Er2O3	40-50	2 h	ec50	0.033	8.62745e-08	E Coli	Bacteria	-7.06412	Kar et al. Chemosphere 264 (2021) 128428
Fe2O3	30-40	2 h	LD50	638.3	0.00398937	E.coli	Bacteria	-2.3991	Hu et al. Sci. Total Environ. 407 (2009) 3070–3072
Fe2O3	12.3	24 h	IC50	>500	#VALUE!	E.coli	Bacteria	#VALUE!	Kaweeteerawat et al. Environ. Sci. Technol. 2015, 49, 1105−1112
Fe2O3	20-40	1.5 h	EC50	1000	0.00625	E.coli	Bacteria	-2.20412	Ko et al. Appl Microbiol Biotechnol (2014) 98:3295–3303
Fe2O3	68	30 min	LC50	636.971	0.00398107	E.coli	Bacteria	-2.4	Pathakoti et al. Journal of Photochemistry and Photobiology B: Biology 130 (2014) 234–240
Fe2O3	15-90	2 h	EC50	820.578	0.00512861	E.coli	Bacteria	-2.29	Puzyn et al. Nature Nanotech 6, 175–178 (2011)
Fe3O4	10-100	2 h	ec50	2000	0.00862069	E Coli	Bacteria	-2.06446	Kar et al. Chemosphere 264 (2021) 128428
Fe3O4	12	24 h	IC50	>500	#VALUE!	E.coli	Bacteria	#VALUE!	Kaweeteerawat et al. Environ. Sci. Technol. 2015, 49, 1105−1112
Ga2O3	654	5 days	ec50	>500	#VALUE!	Methanogenic archaea	Bacteria	#VALUE!	Nguyen et al. Journal of Environmental Science and Health, 2020 Part A, 55:2, 168-178
Ga2O3	654	15 min	ec50	>500	#VALUE!	Vibrio fischeri	Bacteria	#VALUE!	Nguyen et al. Journal of Environmental Science and Health, 2020 Part A, 55:2, 168-178
Gd2O3	<100	2 h	ec50	1212	0.00334807	E Coli	Bacteria	-2.47521	Kar et al. Chemosphere 264 (2021) 128428
Gd2O3	43.8	24 h	IC50	>500	-	E.coli	Bacteria	#VALUE!	Kaweeteerawat et al. Environ. Sci. Technol. 2015, 49, 1105−1112
HfO2	28.4	24 h	IC50	>500	#VALUE!	E.coli	Bacteria	#VALUE!	Kaweeteerawat et al. Environ. Sci. Technol. 2015, 49, 1105−1112
In2O3	60	30 min	LC50	411.192	0.00147911	E.coli	Bacteria	-2.83	Pathakoti et al. Journal of Photochemistry and Photobiology B: Biology 130 (2014) 234–240
In2O3	15-90	2 h	EC50	430.571	0.00154882	E.coli	Bacteria	-2.81	Puzyn et al. Nature Nanotech 6, 175–178 (2011)
In2O3	626	5 days	ec50	>500	#VALUE!	Methanogenic archaea	Bacteria	#VALUE!	Nguyen et al. Journal of Environmental Science and Health, 2020 Part A, 55:2, 168-178
In2O3	626	15 min	ec50	>500	#VALUE!	Vibrio fischeri	Bacteria	#VALUE!	Nguyen et al. Journal of Environmental Science and Health, 2020 Part A, 55:2, 168-178
In2O3	59.6	24 h	IC50	>500	#VALUE!	E.coli	Bacteria	#VALUE!	Kaweeteerawat et al. Environ. Sci. Technol. 2015, 49, 1105−1112
La2O3	30-40	2 h	LD50	456.9	0.00140153	E.coli	Bacteria	-2.8534	Hu et al. Sci. Total Environ. 407 (2009) 3070–3072
La2O3	65	30 min	LC50	3.57452	1.09648e-05	E.coli	Bacteria	-4.96	Pathakoti et al. Journal of Photochemistry and Photobiology B: Biology 130 (2014) 234–240
La2O3	15-90	2 h	EC50	439.762	0.00134896	E.coli	Bacteria	-2.87	Puzyn et al. Nature Nanotech 6, 175–178 (2011)
La2O3	24.6	24 h	IC50	>500	#VALUE!	E.coli	Bacteria	#VALUE!	Kaweeteerawat et al. Environ. Sci. Technol. 2015, 49, 1105−1112
MgO	13.6	30 min	EC50	>100	#VALUE!	Vibrio Fischeri	Bacteria	#VALUE!	Aruoja et al Environ. Sci.: Nano, 2015,2, 630-644
MgO	<50	30 min	EC50	61.87	0.00154675	Vibrio fischeri	Bacteria	-2.81058	Sovova et al., 2009, Proceedings,NANOCON Conference, Roznov , Czech Republic, pp 62‐71,
Mn2O3	40-60	2 h	ec50	130	0.000822785	E Coli	Bacteria	-3.08471	Kar et al. Chemosphere 264 (2021) 128428
Mn2O3	51.5	24 h	IC50	70	0.000443038	E.coli	Bacteria	-3.35356	Kaweeteerawat et al. Environ. Sci. Technol. 2015, 49, 1105−1112
Ni2O3	140.6	24 h	IC50	181	0.00109697	E.coli	Bacteria	-2.95981	Kaweeteerawat et al. Environ. Sci. Technol. 2015, 49, 1105−1112
NiO	30	1.5 h	EC50	198.02	0.00264027	E.coli	Bacteria	-2.57835	Ko et al. Appl Microbiol Biotechnol (2014) 98:3295–3303
NiO	14	30 min	LC50	12.1636	0.000162181	E.coli	Bacteria	-3.79	Pathakoti et al. Journal of Photochemistry and Photobiology B: Biology 130 (2014) 234–240
NiO	15-90	2 h	EC50	26.611	0.000354813	E.coli	Bacteria	-3.45	Puzyn et al. Nature Nanotech 6, 175–178 (2011)
NiO	13.1	24 h	IC50	>500	#VALUE!	E.coli	Bacteria	#VALUE!	Kaweeteerawat et al. Environ. Sci. Technol. 2015, 49, 1105−1112
Pd	100	96 h	EC50	7.54	7.11321e-05	Soil bacterial community	Bacteria	-4.14793	Y. Zhai et al. Ecotoxicology and Environmental Safety 145 (2017) 349–365
Pd	150	96 h	EC50	9.36	8.83019e-05	Soil bacterial community	Bacteria	-4.05403	Y. Zhai et al. Ecotoxicology and Environmental Safety 145 (2017) 349–366
Pd	15.1	30 min	EC50	55.42	0.00052283	Vibrio Fischeri	Bacteria	-3.28164	Aruoja et al Environ. Sci.: Nano, 2015,2, 630-644
Sb2O3	84	30 min	LC50	221.505	0.000758578	E.coli	Bacteria	-3.12	Pathakoti et al. Journal of Photochemistry and Photobiology B: Biology 130 (2014) 234–240
Sb2O3	15-90	2 h	EC50	668.933	0.00229087	E.coli	Bacteria	-2.64	Puzyn et al. Nature Nanotech 6, 175–178 (2011)
Sb2O3	20.5	30 min	EC50	73.74	0.000252534	Vibrio Fischeri	Bacteria	-3.59768	Aruoja et al Environ. Sci.: Nano, 2015,2, 630-644
Sb2O3	11.8	24 h	IC50	>500	#VALUE!	E.coli	Bacteria	#VALUE!	Kaweeteerawat et al. Environ. Sci. Technol. 2015, 49, 1105−1112
SiO2	212	4 h	ec50	>100	#VALUE!	Bacillus subtilis	Bacteria	#VALUE!	Bondarenko et al. Nanotoxicology, 2016; 10(9): 1229–1242
SiO2	13.5	24 h	IC50	500	0.00833333	E.coli	Bacteria	-2.07918	Kaweeteerawat et al. Environ. Sci. Technol. 2015, 49, 1105−1112
SiO2	20	30 min	LC50	173.042	0.00288403	E.coli	Bacteria	-2.54	Pathakoti et al. Journal of Photochemistry and Photobiology B: Biology 130 (2014) 234–240
SiO2	15-90	2 h	EC50	378.574	0.00630957	E.coli	Bacteria	-2.2	Puzyn et al. Nature Nanotech 6, 175–178 (2011)
SiO2	212	4 h	ec50	>100	#VALUE!	Escherichia Coli	Bacteria	#VALUE!	Bondarenko et al. Nanotoxicology, 2016; 10(9): 1229–1242
SiO2	212	4 h	ec50	>100	#VALUE!	Pseudomonas aeruginosa	Bacteria	#VALUE!	Bondarenko et al. Nanotoxicology, 2016; 10(9): 1229–1242
SiO2	212	4 h	ec50	>100	#VALUE!	Pseudomonas putida	Bacteria	#VALUE!	Bondarenko et al. Nanotoxicology, 2016; 10(9): 1229–1242
SiO2	212	4 h	ec50	>100	#VALUE!	Staphylococcus aureus	Bacteria	#VALUE!	Bondarenko et al. Nanotoxicology, 2016; 10(9): 1229–1242
SiO2	7.8	30 min	EC50	>100	#VALUE!	Vibrio Fischeri	Bacteria	#VALUE!	Aruoja et al Environ. Sci.: Nano, 2015,2, 630-644
SiO2	212	30 min	ec50	>100	#VALUE!	Vibrio fischeri	Bacteria	#VALUE!	Bondarenko et al. Nanotoxicology, 2016; 10(9): 1229–1242
SnO2	30-40	2 h	LD50	1045.6	0.0069245	E.coli	Bacteria	-2.15961	Hu et al. Sci. Total Environ. 407 (2009) 3070–3072
SnO2	62.4	24 h	IC50	500	0.00331126	E.coli	Bacteria	-2.48001	Kaweeteerawat et al. Environ. Sci. Technol. 2015, 49, 1105−1112
SnO2	15	30 min	LC50	445.633	0.00295121	E.coli	Bacteria	-2.53	Pathakoti et al. Journal of Photochemistry and Photobiology B: Biology 130 (2014) 234–240
SnO2	15-90	2 h	EC50	1475.63	0.00977237	E.coli	Bacteria	-2.01	Puzyn et al. Nature Nanotech 6, 175–178 (2011)
TiO2	5	4 h	ec50	>100	#VALUE!	Bacillus subtilis	Bacteria	#VALUE!	Bondarenko et al. Nanotoxicology, 2016; 10(9): 1229–1242
TiO2	50-70	2 h	ec50	20000	0.25	E. coli AB1157	Bacteria	-0.60206	Ivansk et al Anal Bioanal Chem (2010) 398:701–716
TiO2	50-70	30 min	ec50	20000	0.25	E. coli AB1157	Bacteria	-0.60206	Ivansk et al Anal Bioanal Chem (2010) 398:701–716
TiO2	50-70	2 h	ec50	20000	0.25	E. coli AS391	Bacteria	-0.60206	Ivansk et al Anal Bioanal Chem (2010) 398:701–716
TiO2	50-70	30 min	ec50	20000	0.25	E. coli AS391	Bacteria	-0.60206	Ivansk et al Anal Bioanal Chem (2010) 398:701–716
TiO2	50-70	2 h	ec50	20000	0.25	E. coli AS393	Bacteria	-0.60206	Ivansk et al Anal Bioanal Chem (2010) 398:701–716
TiO2	50-70	30 min	ec50	20000	0.25	E. coli AS393	Bacteria	-0.60206	Ivansk et al Anal Bioanal Chem (2010) 398:701–716
TiO2	50-70	2 h	ec50	20000	0.25	E. coli JI130	Bacteria	-0.60206	Ivansk et al Anal Bioanal Chem (2010) 398:701–716
TiO2	50-70	30 min	ec50	20000	0.25	E. coli JI130	Bacteria	-0.60206	Ivansk et al Anal Bioanal Chem (2010) 398:701–716
TiO2	50-70	2 h	ec50	20000	0.25	E. coli JI131	Bacteria	-0.60206	Ivansk et al Anal Bioanal Chem (2010) 398:701–716
TiO2	50-70	30 min	ec50	20000	0.25	E. coli JI131	Bacteria	-0.60206	Ivansk et al Anal Bioanal Chem (2010) 398:701–716
TiO2	50-70	2 h	ec50	20000	0.25	E. coli JI132	Bacteria	-0.60206	Ivansk et al Anal Bioanal Chem (2010) 398:701–716
TiO2	50-70	30 min	ec50	20000	0.25	E. coli JI132	Bacteria	-0.60206	Ivansk et al Anal Bioanal Chem (2010) 398:701–716
TiO2	30-40	2 h	LD50	1104	0.0138	E.coli	Bacteria	-1.86012	Hu et al. Sci. Total Environ. 407 (2009) 3070–3072
TiO2	12.6	24 h	IC50	500	0.00625	E.coli	Bacteria	-2.20412	Kaweeteerawat et al. Environ. Sci. Technol. 2015, 49, 1105−1112
TiO2	<25	1.5 h	EC50	1000	0.0125	E.coli	Bacteria	-1.90309	Ko et al. Appl Microbiol Biotechnol (2014) 98:3295–3303
TiO2	42	30 min	LC50	579.549	0.00724436	E.coli	Bacteria	-2.14	Pathakoti et al. Journal of Photochemistry and Photobiology B: Biology 130 (2014) 234–240
TiO2	15-90	2 h	EC50	1455.76	0.018197	E.coli	Bacteria	-1.74	Puzyn et al. Nature Nanotech 6, 175–178 (2011)
TiO2	42.3	30 min	LC50	583	0.0072875	Escherichia Coli	Bacteria	-2.13742	Dasari et al. J Environ Sci, 2013;25(5):882-8
TiO2	5	4 h	ec50	>100	#VALUE!	Escherichia Coli	Bacteria	#VALUE!	Bondarenko et al. Nanotoxicology, 2016; 10(9): 1229–1242
TiO2	5	4 h	ec50	>100	#VALUE!	Pseudomonas aeruginosa	Bacteria	#VALUE!	Bondarenko et al. Nanotoxicology, 2016; 10(9): 1229–1242
TiO2	5	4 h	ec50	>100	#VALUE!	Pseudomonas putida	Bacteria	#VALUE!	Bondarenko et al. Nanotoxicology, 2016; 10(9): 1229–1242
TiO2	5	4 h	ec50	>100	#VALUE!	Staphylococcus aureus	Bacteria	#VALUE!	Bondarenko et al. Nanotoxicology, 2016; 10(9): 1229–1242
TiO2	25-70	30 min	EC50	20000	0.25	Vibrio fischeri	Bacteria	-0.60206	Heinlaan et al. Chemosphere 2008; 71 (7) 1308-1316
TiO2	5	30 min	ec50	>100	#VALUE!	Vibrio fischeri	Bacteria	#VALUE!	Bondarenko et al. Nanotoxicology, 2016; 10(9): 1229–1242
V2O3	-	30 min	LC50	49.6697	0.000331131	E.coli	Bacteria	-3.48	Pathakoti et al. Journal of Photochemistry and Photobiology B: Biology 130 (2014) 234–240
V2O3	15-90	2 h	EC50	108.665	0.000724436	E.coli	Bacteria	-3.14	Puzyn et al. Nature Nanotech 6, 175–178 (2011)
WO3	30-70	2 h	ec50	2000	0.00862069	E Coli	Bacteria	-2.06446	Kar et al. Chemosphere 264 (2021) 128428
WO3	16.6	24 h	IC50	>500	#VALUE!	E.coli	Bacteria	#VALUE!	Kaweeteerawat et al. Environ. Sci. Technol. 2015, 49, 1105−1112
WO3	10.6	30 min	EC50	87.07	0.000375302	Vibrio Fischeri	Bacteria	-3.42562	Aruoja et al Environ. Sci.: Nano, 2015,2, 630-644
Y2O3	32.7	24 h	IC50	>500	#VALUE!	E.coli	Bacteria	#VALUE!	Kaweeteerawat et al. Environ. Sci. Technol. 2015, 49, 1105−1112
Y2O3	38	30 min	LC50	0.366529	1.62181e-06	E.coli	Bacteria	-5.79	Pathakoti et al. Journal of Photochemistry and Photobiology B: Biology 130 (2014) 234–240
Y2O3	15-90	2 h	EC50	304.866	0.00134896	E.coli	Bacteria	-2.87	Puzyn et al. Nature Nanotech 6, 175–178 (2011)
Yb2O3	61.7	24 h	IC50	>500	#VALUE!	E.coli	Bacteria	#VALUE!	Kaweeteerawat et al. Environ. Sci. Technol. 2015, 49, 1105−1112
Zn	40	15 min	EC50	20.5	0.000315385	Vibrio Fischeri	Bacteria	-3.50116	Zhang et al. Environ Monit Assess (2020) 192: 484
ZnO	13.6	4 h	ec50	14	0.00017284	Bacillus subtilis	Bacteria	-3.76236	Bondarenko et al. Nanotoxicology, 2016; 10(9): 1229–1242
ZnO	25-70	2 h	ec50	67.2	0.00082963	E. coli AB1157	Bacteria	-3.08112	Ivansk et al Anal Bioanal Chem (2010) 398:701–716
ZnO	25-70	30 min	ec50	183	0.00225926	E. coli AB1157	Bacteria	-2.64603	Ivansk et al Anal Bioanal Chem (2010) 398:701–716
ZnO	25-70	2 h	ec50	5.54	6.83951e-05	E. coli AS391	Bacteria	-4.16498	Ivansk et al Anal Bioanal Chem (2010) 398:701–716
ZnO	25-70	30 min	ec50	13.4	0.000165432	E. coli AS391	Bacteria	-3.78138	Ivansk et al Anal Bioanal Chem (2010) 398:701–716
ZnO	25-70	2 h	ec50	86.8	0.0010716	E. coli AS393	Bacteria	-2.96997	Ivansk et al Anal Bioanal Chem (2010) 398:701–716
ZnO	25-70	30 min	ec50	171	0.00211111	E. coli AS393	Bacteria	-2.67549	Ivansk et al Anal Bioanal Chem (2010) 398:701–716
ZnO	25-70	2 h	ec50	89.1	0.0011	E. coli JI130	Bacteria	-2.95861	Ivansk et al Anal Bioanal Chem (2010) 398:701–716
ZnO	25-70	30 min	ec50	234	0.00288889	E. coli JI130	Bacteria	-2.53927	Ivansk et al Anal Bioanal Chem (2010) 398:701–716
ZnO	25-70	2 h	ec50	82.4	0.00101728	E. coli JI131	Bacteria	-2.99256	Ivansk et al Anal Bioanal Chem (2010) 398:701–716
ZnO	25-70	30 min	ec50	196	0.00241975	E. coli JI131	Bacteria	-2.61623	Ivansk et al Anal Bioanal Chem (2010) 398:701–716
ZnO	25-70	2 h	ec50	6.91	8.53086e-05	E. coli JI132	Bacteria	-4.06901	Ivansk et al Anal Bioanal Chem (2010) 398:701–716
ZnO	25-70	30 min	ec50	22.6	0.000279012	E. coli JI132	Bacteria	-3.55438	Ivansk et al Anal Bioanal Chem (2010) 398:701–716
ZnO	30-40	2 h	LD50	21.1	0.000260494	E.coli	Bacteria	-3.5842	Hu et al. Sci. Total Environ. 407 (2009) 3070–3072
ZnO	22.6	24 h	IC50	33	0.000407407	E.coli	Bacteria	-3.38997	Kaweeteerawat et al. Environ. Sci. Technol. 2015, 49, 1105−1112
ZnO	-	1.5 h	EC50	1.1	1.35802e-05	E.coli	Bacteria	-4.86709	Ko et al. Appl Microbiol Biotechnol (2014) 98:3295–3303
ZnO	71	30 min	LC50	0.128376	1.58489e-06	E.coli	Bacteria	-5.8	Pathakoti et al. Journal of Photochemistry and Photobiology B: Biology 130 (2014) 234–240
ZnO	15-90	2 h	EC50	28.7399	0.000354813	E.coli	Bacteria	-3.45	Puzyn et al. Nature Nanotech 6, 175–178 (2011)
ZnO	13.6	4 h	ec50	67	0.00082716	Escherichia Coli	Bacteria	-3.08241	Bondarenko et al. Nanotoxicology, 2016; 10(9): 1229–1242
ZnO	71	30 min	LC50	0.13	1.60494e-06	Escherichia Coli	Bacteria	-5.79454	Dasari et al. J Environ Sci, 2013;25(5):882-8
ZnO	13.6	4 h	ec50	69	0.000851852	Pseudomonas putida	Bacteria	-3.06964	Bondarenko et al. Nanotoxicology, 2016; 10(9): 1229–1242
ZnO	18	96 h	EC50	1.34	1.65432e-05	Soil bacterial community	Bacteria	-4.78138	Y. Zhai et al. Ecotoxicology and Environmental Safety 145 (2017) 349–358
ZnO	43	96 h	EC50	1.51	1.8642e-05	Soil bacterial community	Bacteria	-4.72951	Y. Zhai et al. Ecotoxicology and Environmental Safety 145 (2017) 349–359
ZnO	150	96 h	EC50	1.65	2.03704e-05	Soil bacterial community	Bacteria	-4.691	Y. Zhai et al. Ecotoxicology and Environmental Safety 145 (2017) 349–360
ZnO	13.6	4 h	ec50	16	0.000197531	Staphylococcus aureus	Bacteria	-3.70437	Bondarenko et al. Nanotoxicology, 2016; 10(9): 1229–1242
ZnO	20.4	30 min	EC50	11.52	0.000142222	Vibrio Fischeri	Bacteria	-3.84703	Aruoja et al Environ. Sci.: Nano, 2015,2, 630-644
ZnO	13.6	30 min	ec50	8.3	0.000102469	Vibrio fischeri	Bacteria	-3.98941	Bondarenko et al. Nanotoxicology, 2016; 10(9): 1229–1242
ZnO	50-70	30 min	EC50	1.9	2.34568e-05	Vibrio fischeri	Bacteria	-4.62973	Heinlaan et al. Chemosphere 2008; 71 (7) 1308-1316
ZnO	<100	30 min	EC50	7.276	8.98272e-05	Vibrio fischeri	Bacteria	-4.04659	Sovova et al., 2009, Proceedings,NANOCON Conference, Roznov , Czech Republic, pp 62‐71,
ZnO	40	15 min	EC50	11.6	0.00014321	Vibrio Fischeri	Bacteria	-3.84403	Zhang et al. Environ Monit Assess (2020) 192: 484
ZnO	50-70	30 min	ec50	4.8	5.92593e-05	Vibrio fischieri	Bacteria	-4.22724	Mortimer et al. Toxicology in Vitro 22 (2008) 1412–1417
ZrO2	40.1	24 h	IC50	500	0.00406504	E.coli	Bacteria	-2.39094	Kaweeteerawat et al. Environ. Sci. Technol. 2015, 49, 1105−1112
ZrO2	27	30 min	LC50	323.523	0.00263027	E.coli	Bacteria	-2.58	Pathakoti et al. Journal of Photochemistry and Photobiology B: Biology 130 (2014) 234–240
ZrO2	15-90	2 h	EC50	870.773	0.00707946	E.coli	Bacteria	-2.15	Puzyn et al. Nature Nanotech 6, 175–178 (2011)

## Sheet: Crustacean
NP	Size	Exposure time	Endpoint	Value (mg/l	Value(mol/L)	Cell type	Cell group	Log(endpoint)	reference
Ag	26.6	48 h	LC50	0.067	6.2037e-07	Ceriodaphnia dubia (neonates)	Crustacean	-6.20735	Griffit et al. Environm. Toxicol. Chem. 2008; 27 (9) 1972–1978
Ag	20.4	48 h	ec50	0.003	2.77778e-08	Daphnia magna	Crustacean	-7.5563	Bondarenko et al. Nanotoxicology, 2016; 10(9): 1229–1242
Ag	10	48 h	LC50	0.004	3.7037e-08	Daphnia magna	Crustacean	-7.43136	Hoheisel et al. 2012, Environ. Toxicol. Chem. 31: 2557–2563
Ag	10	48 h	LC50	0.01	9.25926e-08	Daphnia magna	Crustacean	-7.03342	Hoheisel et al. 2012, Environ. Toxicol. Chem. 31: 2557–2563
Ag	20	48 h	LC50	0.008	7.40741e-08	Daphnia magna	Crustacean	-7.13033	Hoheisel et al. 2012, Environ. Toxicol. Chem. 31: 2557–2563
Ag	20	48 h	LC50	0.014	1.2963e-07	Daphnia magna	Crustacean	-6.8873	Hoheisel et al. 2012, Environ. Toxicol. Chem. 31: 2557–2563
Ag	30	48 h	LC50	0.018	1.66667e-07	Daphnia magna	Crustacean	-6.77815	Hoheisel et al. 2012, Environ. Toxicol. Chem. 31: 2557–2563
Ag	30	48 h	LC50	0.018	1.66667e-07	Daphnia magna	Crustacean	-6.77815	Hoheisel et al. 2012, Environ. Toxicol. Chem. 31: 2557–2563
Ag	50	48 h	LC50	0.024	2.22222e-07	Daphnia magna	Crustacean	-6.65321	Hoheisel et al. 2012, Environ. Toxicol. Chem. 31: 2557–2563
Ag	50	48 h	LC50	0.03	2.77778e-07	Daphnia magna	Crustacean	-6.5563	Hoheisel et al. 2012, Environ. Toxicol. Chem. 31: 2557–2563
Ag	26.6	48 h	LC50	0.04	3.7037e-07	Daphnia pulex (adults)	Crustacean	-6.43136	Griffit et al. Environm. Toxicol. Chem. 2008; 27 (9) 1972–1978
Al	41.7	48 h	LC50	3.99	0.000147778	Ceriodaphnia dubia (neonates)	Crustacean	-3.83039	Griffit et al. Environm. Toxicol. Chem. 2008; 27 (9) 1972–1978
Al2O3	80	48 h	LC50	500	0.00490196	Daphnia magna (neonates)	Crustacean	-2.30963	Zhu et al., J. Nanopart. Res. 2009; 11 (1) 67–75
Al2O3	80	48 h	EC50	500	0.00490196	Daphnia magna (neonates)	Crustacean	-2.30963	Zhu et al., J. Nanopart. Res. 2009; 11 (1) 67–75
Co	10.5	48 h	LC50	1.67	2.83051e-05	Ceriodaphnia dubia (neonates)	Crustacean	-4.54814	Griffit et al. Environm. Toxicol. Chem. 2008; 27 (9) 1972–1978
Cu	26.7	48 h	LC50	0.419	6.54687e-06	Ceriodaphnia dubia (neonates)	Crustacean	-5.18397	Griffit et al. Environm. Toxicol. Chem. 2008; 27 (9) 1972–1978
Cu	26.7	48 h	LC50	0.06	9.375e-07	Daphnia pulex (adults)	Crustacean	-6.02803	Griffit et al. Environm. Toxicol. Chem. 2008; 27 (9) 1972–1978
CuO	30	48 h	EC50	92.7	0.00116538	daphnia magna	Crustacean	-2.93353	Blinova et al. / Environmental Pollution 158 (2010) 41–4744
CuO	30	48 h	EC50	149	0.00187315	daphnia magna	Crustacean	-2.72743	Blinova et al. / Environmental Pollution 158 (2010) 41–4744
CuO	30	48 h	EC50	160	0.00201144	daphnia magna	Crustacean	-2.69649	Blinova et al. / Environmental Pollution 158 (2010) 41–4744
CuO	30	48 h	EC50	200	0.0025143	daphnia magna	Crustacean	-2.59958	Blinova et al. / Environmental Pollution 158 (2010) 41–4744
CuO	30	48 h	EC50	224	0.00281602	daphnia magna	Crustacean	-2.55036	Blinova et al. / Environmental Pollution 158 (2010) 41–4744
CuO	24.5	48 h	ec50	0.9	1.13144e-05	Daphnia magna	Crustacean	-4.94637	Bondarenko et al. Nanotoxicology, 2016; 10(9): 1229–1242
CuO	<50	48 h	EC50	5.903	7.42096e-05	Daphnia magna	Crustacean	-4.12954	Sovova et al., 2009, Proceedings,NANOCON Conference, Roznov , Czech Republic, pp 62‐71,
CuO	30	48 h	LC50	3.2	4e-05	Daphnia magna (neonates)	Crustacean	-4.39794	Heinlaan et al. Chemosphere 2008; 71 (7) 1308-1316
CuO	30	24 h	LC50	152	0.00191087	Thamnocephalus platyurus	Crustacean	-2.71877	Blinova et al. / Environmental Pollution 158 (2010) 41–4744
CuO	30	24 h	LC50	217	0.00272802	Thamnocephalus platyurus	Crustacean	-2.56415	Blinova et al. / Environmental Pollution 158 (2010) 41–4744
CuO	30	24 h	LC50	92.7	0.00116538	Thamnocephalus platyurus	Crustacean	-2.93353	Blinova et al. / Environmental Pollution 158 (2010) 41–4744
CuO	30	24 h	LC50	112	0.00140801	Thamnocephalus platyurus	Crustacean	-2.85139	Blinova et al. / Environmental Pollution 158 (2010) 41–4744
CuO	30	24 h	LC50	129	0.00162172	Thamnocephalus platyurus	Crustacean	-2.79002	Blinova et al. / Environmental Pollution 158 (2010) 41–4744
CuO	30	24 h	LC50	90.3	0.00113521	Thamnocephalus platyurus	Crustacean	-2.94493	Blinova et al. / Environmental Pollution 158 (2010) 41–4744
CuO	30	24 h	LC50	2.1	2.625e-05	Thamnocephalus platyurus	Crustacean	-4.58087	Heinlaan et al. Chemosphere 2008; 71 (7) 1308-1316
La2O3	59	48 h	ec50	500	0.00153374	Daphnia magna	Crustacean	-2.81425	Balusamy et al. Environ. Sci.: Processes Impacts, 2015,17, 1265-1270
MgO	<50	48 h	EC50	25.46	0.0006365	Daphnia magna	Crustacean	-3.1962	Sovova et al., 2009, Proceedings,NANOCON Conference, Roznov , Czech Republic, pp 62‐71,
Ni	6.1	48 h	LC50	0.674	1.14237e-05	Ceriodaphnia dubia (neonates)	Crustacean	-4.94219	Griffit et al. Environm. Toxicol. Chem. 2008; 27 (9) 1972–1978
Ni	6.1	48 h	LC50	3.89	6.59322e-05	Daphnia pulex (adults)	Crustacean	-4.1809	Griffit et al. Environm. Toxicol. Chem. 2008; 27 (9) 1972–1978
SiO2	212	48 h	ec50	>100	#VALUE!	Daphnia magna	Crustacean	#VALUE!	Bondarenko et al. Nanotoxicology, 2016; 10(9): 1229–1242
TiO2	<25	48 h	EC50	300	0.00375	Daphnia magna	Crustacean	-2.42597	Sovova et al., 2009, Proceedings,NANOCON Conference, Roznov , Czech Republic, pp 62‐71,
TiO2	5	48 h	ec50	>100	#VALUE!	Daphnia magna	Crustacean	#VALUE!	Bondarenko et al. Nanotoxicology, 2016; 10(9): 1229–1242
TiO2	25-70	48 h	LC50	20000	0.25	Daphnia magna (neonates)	Crustacean	-0.60206	Heinlaan et al. Chemosphere 2008; 71 (7) 1308-1316
TiO2	21	72 h	LC50	2.02	2.525e-05	Daphnia magna (neonates)	Crustacean	-4.59774	Zhu et al. Chemosphere 2010; 78 (3) 209-216
TiO2	21	72 h	EC50	1.62	2.025e-05	Daphnia magna (neonates)	Crustacean	-4.69357	Zhu et al. Chemosphere 2010; 78 (3) 209-216
TiO2	<20	48 h	LC50	500	0.00625	Daphnia magna (neonates)	Crustacean	-2.20412	Zhu et al., J. Nanopart. Res. 2009; 11 (1) 67–75
TiO2	<20	48 h	EC50	500	0.00625	Daphnia magna (neonates)	Crustacean	-2.20412	Zhu et al., J. Nanopart. Res. 2009; 11 (1) 67–75
TiO2	21	48 h	EC50	>100	#VALUE!	Daphnia magna (neonates)	Crustacean	#VALUE!	Zhu et al. Chemosphere 2010; 78 (3) 209-216
TiO2	25-70	24 h	LC50	20000	0.25	Thamnocephalus platyurus	Crustacean	-0.60206	Heinlaan et al. Chemosphere 2008; 71 (7) 1308-1316
ZnO	70	48 h	EC50	3.3	4.07407e-05	daphnia magna	Crustacean	-4.38997	Blinova et al. / Environmental Pollution 158 (2010) 41–4744
ZnO	70	48 h	EC50	9	0.000111111	daphnia magna	Crustacean	-3.95424	Blinova et al. / Environmental Pollution 158 (2010) 41–4744
ZnO	70	48 h	EC50	1.7	2.09877e-05	daphnia magna	Crustacean	-4.67804	Blinova et al. / Environmental Pollution 158 (2010) 41–4744
ZnO	70	48 h	EC50	3.5	4.32099e-05	daphnia magna	Crustacean	-4.36442	Blinova et al. / Environmental Pollution 158 (2010) 41–4744
ZnO	70	48 h	EC50	2.8	3.45679e-05	daphnia magna	Crustacean	-4.46133	Blinova et al. / Environmental Pollution 158 (2010) 41–4744
ZnO	70	48 h	EC50	3.4	4.19753e-05	daphnia magna	Crustacean	-4.37701	Blinova et al. / Environmental Pollution 158 (2010) 41–4744
ZnO	13.6	48 h	ec50	1.87	2.30864e-05	Daphnia magna	Crustacean	-4.63664	Bondarenko et al. Nanotoxicology, 2016; 10(9): 1229–1242
ZnO	<100	48 h	EC50	2.6	3.20988e-05	Daphnia magna	Crustacean	-4.49351	Sovova et al., 2009, Proceedings,NANOCON Conference, Roznov , Czech Republic, pp 62‐71,
ZnO	50-70	48 h	LC50	3.2	3.95062e-05	Daphnia magna (neonates)	Crustacean	-4.40334	Heinlaan et al. Chemosphere 2008; 71 (7) 1308-1316
ZnO	20	48 h	LC50	1.50343	1.85608e-05	Daphnia magna (neonates)	Crustacean	-4.7314	Zhu et al., J. Nanopart. Res. 2009; 11 (1) 67–75
ZnO	20	48 h	EC50	0.618883	7.64053e-06	Daphnia magna (neonates)	Crustacean	-5.11688	Zhu et al., J. Nanopart. Res. 2009; 11 (1) 67–75
ZnO	70	24 h	LC50	1.1	1.35802e-05	Thamnocephalus platyurus	Crustacean	-4.86709	Blinova et al. / Environmental Pollution 158 (2010) 41–4744
ZnO	70	24 h	LC50	6	7.40741e-05	Thamnocephalus platyurus	Crustacean	-4.13033	Blinova et al. / Environmental Pollution 158 (2010) 41–4744
ZnO	70	24 h	LC50	3.6	4.44444e-05	Thamnocephalus platyurus	Crustacean	-4.35218	Blinova et al. / Environmental Pollution 158 (2010) 41–4744
ZnO	70	24 h	LC50	1.5	1.85185e-05	Thamnocephalus platyurus	Crustacean	-4.73239	Blinova et al. / Environmental Pollution 158 (2010) 41–4744
ZnO	70	24 h	LC50	5.3	6.54321e-05	Thamnocephalus platyurus	Crustacean	-4.18421	Blinova et al. / Environmental Pollution 158 (2010) 41–4744
ZnO	70	24 h	LC50	1.4	1.7284e-05	Thamnocephalus platyurus	Crustacean	-4.76236	Blinova et al. / Environmental Pollution 158 (2010) 41–4744
ZnO	50-70	24 h	LC50	0.18	2.22222e-06	Thamnocephalus platyurus	Crustacean	-5.65321	Heinlaan et al. Chemosphere 2008; 71 (7) 1308-1316

## Sheet: Eukaryotes
NP	Size	Exposure time	Endpoint	Value (mg/l	Value(mol/L)	Cell type	Cell group	Log(endpoint)	reference
Ag	20.4	24 h	ec50	3.9	3.61111e-05	Tetrahymena thermophila	Eukaryotes & Microalgae	-4.44236	Bondarenko et al. Nanotoxicology, 2016; 10(9): 1229–1242
Ag	30	6 h	EC50	3.86	3.57407e-05	Saccharomyces cerevisae	Eukaryotes & Microalgae	-4.44684	Zhang et al., J Nanopart Res (2016) 18 (2), 372
Ag	30	48 h	EC50	0.45	4.16667e-06	Saccharomyces cerevisae	Eukaryotes & Microalgae	-5.38021	Zhang et al., J Nanopart Res (2016) 18 (2), 372
Al2O3	83.5	48 h	LC50	9269.2	0.0908745	P. multimicronucleatum	Eukaryotes & Microalgae	-1.04156	Li et al. 2012, Chem. Res. Toxicol, 25, 1675−1681
Al2O3	50	10 h	IC50	1000	0.00980392	Saccharomyces cerevisae	Eukaryotes & Microalgae	-2.0086	García-Saucedo et al. / Journal of Hazardous Materials 192 (2011) 1572–1579
Al2O3	50	10 h	IC50	1000	0.00980392	Saccharomyces cerevisae	Eukaryotes & Microalgae	-2.0086	García-Saucedo et al. / Journal of Hazardous Materials 192 (2011) 1572–1579
Al2O3	50	10 h	EC50	1000	0.00980392	Saccharomyces cerevisae	Eukaryotes & Microalgae	-2.0086	García-Saucedo et al. / Journal of Hazardous Materials 192 (2011) 1572–1579
CeO2	5.5	48 h	LC50	1832.5	0.0106541	P. multimicronucleatum	Eukaryotes & Microalgae	-1.97248	Li et al. 2012, Chem. Res. Toxicol, 25, 1675−1681
CeO2	50	10 h	IC50	1000	0.00581395	Saccharomyces cerevisae	Eukaryotes & Microalgae	-2.23553	García-Saucedo et al. / Journal of Hazardous Materials 192 (2011) 1572–1579
CeO2	50	10 h	IC50	1000	0.00581395	Saccharomyces cerevisae	Eukaryotes & Microalgae	-2.23553	García-Saucedo et al. / Journal of Hazardous Materials 192 (2011) 1572–1579
CeO2	50	10 h	EC50	1000	0.00581395	Saccharomyces cerevisae	Eukaryotes & Microalgae	-2.23553	García-Saucedo et al. / Journal of Hazardous Materials 192 (2011) 1572–1579
Co	30	96 h	EC50	38.6	0.000654237	Chaetoceros curvisetus	Eukaryotes & Microalgae	-3.18426	X. Chen et al. Environmental Pollution 236 (2018) 454e461
Co	30	96 h	EC50	21.5	0.000364407	Skeletonema costatum	Eukaryotes & Microalgae	-3.43841	X. Chen et al. Environmental Pollution 236 (2018) 454e461
Co3O4	13-18	72 h	EC50	38.16	0.00015834	C. minutissima	Eukaryotes & Microalgae	-3.80041	Sharan et al. Aquatic Toxicology 224 (2020) 105498
CuO	13.3	48 h	LC50	0.98	1.23201e-05	P. multimicronucleatum	Eukaryotes & Microalgae	-4.90939	Li et al. 2012, Chem. Res. Toxicol, 25, 1675−1681
CuO	30	24 h	EC50	13.4	0.0001675	Saccharomyces cerevisiae S288C	Eukaryotes & Microalgae	-3.77599	Kasemets et al. Toxicol. In Vitro 2009; 23 (6) 1116-1122
CuO	30	8 h	EC50	20.7	0.00025875	Saccharomyces cerevisiae S288C	Eukaryotes & Microalgae	-3.58712	Kasemets et al. Toxicol. In Vitro 2009; 23 (6) 1116-1122
CuO	13.1	24 h	EC50	2	2.5e-05	Tetrahymena thermophila	Eukaryotes & Microalgae	-4.60206	Aruoja et al Environ. Sci.: Nano, 2015,2, 630-644
CuO	20	6 h	EC50	11.38	0.00014225	Saccharomyces cerevisae	Eukaryotes & Microalgae	-3.84695	Zhang et al., J Nanopart Res (2016) 18 (2), 372
CuO	20	48 h	EC50	1.07	1.3375e-05	Saccharomyces cerevisae	Eukaryotes & Microalgae	-4.87371	Zhang et al., J Nanopart Res (2016) 18 (2), 372
Fe2O3	4.7	48 h	LC50	0.81	5.0625e-06	P. multimicronucleatum	Eukaryotes & Microalgae	-5.29563	Li et al. 2012, Chem. Res. Toxicol, 25, 1675−1681
Fe2O3	20-40	10 h	IC50	1000	0.00625	Saccharomyces cerevisae	Eukaryotes & Microalgae	-2.20412	Otero-González et al. / Chemosphere 93 (2013) 1201–1206
Fe2O3	20-40	10 h	IC50	1000	0.00625	Saccharomyces cerevisae	Eukaryotes & Microalgae	-2.20412	Otero-González et al. / Chemosphere 93 (2013) 1201–1206
Fe2O3	20-40	10 h	EC50	1000	0.00625	Saccharomyces cerevisae	Eukaryotes & Microalgae	-2.20412	Otero-González et al. / Chemosphere 93 (2013) 1201–1206
Fe3o4	-	12 h	EC50	1353	0.0058319	Saccharomyces cerevisae	Eukaryotes & Microalgae	-2.23419	Peng et al., Chemico-Biological Interactions,287,2018, 20-26,
Fe3o4	-	12h	IC50	800	0.00344828	Saccharomyces cerevisae	Eukaryotes & Microalgae	-2.4624	Peng et al., Chemico-Biological Interactions,287,2018, 20-26,
Fe3o4	-	12h	EC50	800	0.00344828	Saccharomyces cerevisae	Eukaryotes & Microalgae	-2.4624	Peng et al., Chemico-Biological Interactions,287,2018, 20-26,
Fe3O4	9.7	24 h	EC50	26.03	0.000112198	Tetrahymena thermophila	Eukaryotes & Microalgae	-3.95001	Aruoja et al Environ. Sci.: Nano, 2015,2, 630-644
HfO2	100	10 h	IC50	1000	0.0047619	Saccharomyces cerevisae	Eukaryotes & Microalgae	-2.32222	García-Saucedo et al. / Journal of Hazardous Materials 192 (2011) 1572–1579
HfO2	100	10 h	IC50	1000	0.0047619	Saccharomyces cerevisae	Eukaryotes & Microalgae	-2.32222	García-Saucedo et al. / Journal of Hazardous Materials 192 (2011) 1572–1579
HfO2	100	10 h	EC50	1000	0.0047619	Saccharomyces cerevisae	Eukaryotes & Microalgae	-2.32222	García-Saucedo et al. / Journal of Hazardous Materials 192 (2011) 1572–1579
MgO	13.6	24 h	EC50	>100	#VALUE!	Tetrahymena thermophila	Eukaryotes & Microalgae	#VALUE!	Aruoja et al Environ. Sci.: Nano, 2015,2, 630-644
Mn2O3	30-60	10 h	IC50	170	0.00107595	Saccharomyces cerevisae	Eukaryotes & Microalgae	-2.96821	Otero-González et al. / Chemosphere 93 (2013) 1201–1206
Mn2O3	30-60	10 h	IC50	280	0.00177215	Saccharomyces cerevisae	Eukaryotes & Microalgae	-2.7515	Otero-González et al. / Chemosphere 93 (2013) 1201–1206
Mn2O3	30-60	10 h	EC50	1000	0.00632911	Saccharomyces cerevisae	Eukaryotes & Microalgae	-2.19866	Otero-González et al. / Chemosphere 93 (2013) 1201–1206
SiO2	8.2	48 h	LC50	442.6	0.00737667	P. multimicronucleatum	Eukaryotes & Microalgae	-2.13214	Li et al. 2012, Chem. Res. Toxicol, 25, 1675−1681
SiO2	7.8	24 h	EC50	>100	#VALUE!	Tetrahymena thermophila	Eukaryotes & Microalgae	#VALUE!	Aruoja et al Environ. Sci.: Nano, 2015,2, 630-644
SiO2	212	24 h	ec50	>100	#VALUE!	Tetrahymena thermophila	Eukaryotes & Microalgae	#VALUE!	Bondarenko et al. Nanotoxicology, 2016; 10(9): 1229–1242
SiO2	10--20	10 h	IC50	1000	0.0166667	Saccharomyces cerevisae	Eukaryotes & Microalgae	-1.77815	García-Saucedo et al. / Journal of Hazardous Materials 192 (2011) 1572–1579
SiO2	10--20	10 h	IC50	1000	0.0166667	Saccharomyces cerevisae	Eukaryotes & Microalgae	-1.77815	García-Saucedo et al. / Journal of Hazardous Materials 192 (2011) 1572–1579
SiO2	10--20	10 h	EC50	1000	0.0166667	Saccharomyces cerevisae	Eukaryotes & Microalgae	-1.77815	García-Saucedo et al. / Journal of Hazardous Materials 192 (2011) 1572–1579
TiO2	5.1	48 h	LC50	7215.2	0.09019	P. multimicronucleatum	Eukaryotes & Microalgae	-1.04484	Li et al. 2012, Chem. Res. Toxicol, 25, 1675−1681
TiO2	25-70	24 h	EC50	20000	0.25	Saccharomyces cerevisiae S288C	Eukaryotes & Microalgae	-0.60206	Kasemets et al. Toxicol. In Vitro 2009; 23 (6) 1116-1122
TiO2	25-70	8 h	EC50	20000	0.25	Saccharomyces cerevisiae S288C	Eukaryotes & Microalgae	-0.60206	Kasemets et al. Toxicol. In Vitro 2009; 23 (6) 1116-1122
TiO2	12.2	24 h	EC50	52.62	0.00065775	Tetrahymena thermophila	Eukaryotes & Microalgae	-3.18194	Aruoja et al Environ. Sci.: Nano, 2015,2, 630-644
TiO2	5	24 h	ec50	>100	#VALUE!	Tetrahymena thermophila	Eukaryotes & Microalgae	#VALUE!	Bondarenko et al. Nanotoxicology, 2016; 10(9): 1229–1242
TiO2	<25	20 h	IC50	>100	#VALUE!	Tetrahymena Thermophila	Eukaryotes & Microalgae	#VALUE!	Ud Daula et al., Journal of Environmental Science and Health, Part A (2013) 48, 1343–1348
TiO2	<25	40 h	IC50	>100	#VALUE!	Tetrahymena Thermophila	Eukaryotes & Microalgae	#VALUE!	Ud Daula et al., Journal of Environmental Science and Health, Part A (2013) 48, 1343–1348
TiO2	<25	6 h	EC50	>100	#VALUE!	Tetrahymena Thermophila	Eukaryotes & Microalgae	#VALUE!	Ud Daula et al., Journal of Environmental Science and Health, Part A (2013) 48, 1343–1348
TiO2	<25	20 h	EC50	>100	#VALUE!	Tetrahymena Thermophila	Eukaryotes & Microalgae	#VALUE!	Ud Daula et al., Journal of Environmental Science and Health, Part A (2013) 48, 1343–1348
TiO2	<25	40 h	EC50	>100	#VALUE!	Tetrahymena Thermophila	Eukaryotes & Microalgae	#VALUE!	Ud Daula et al., Journal of Environmental Science and Health, Part A (2013) 48, 1343–1348
TiO2	21	10 h	IC50	1000	0.0125	Saccharomyces cerevisae	Eukaryotes & Microalgae	-1.90309	Otero-González et al. / Chemosphere 93 (2013) 1201–1206
TiO2	21	10 h	IC50	1000	0.0125	Saccharomyces cerevisae	Eukaryotes & Microalgae	-1.90309	Otero-González et al. / Chemosphere 93 (2013) 1201–1206
TiO2	21	10 h	EC50	1000	0.0125	Saccharomyces cerevisae	Eukaryotes & Microalgae	-1.90309	Otero-González et al. / Chemosphere 93 (2013) 1201–1206
ZnO	9.8	48 h	LC50	573.8	0.00708395	P. multimicronucleatum	Eukaryotes & Microalgae	-2.14972	Li et al. 2012, Chem. Res. Toxicol, 25, 1675−1681
ZnO	50-70	8 h	EC50	121	0.00149383	Saccharomyces cerevisiae S288C	Eukaryotes & Microalgae	-2.8257	Kasemets et al. Toxicol. In Vitro 2009; 23 (6) 1116-1122
ZnO	50-70	24 h	EC50	131	0.00161728	Saccharomyces cerevisiae S288C	Eukaryotes & Microalgae	-2.79121	Kasemets et al. Toxicol. In Vitro 2009; 23 (6) 1116-1122
ZnO	20.4	24 h	EC50	1.84	2.2716e-05	Tetrahymena thermophila	Eukaryotes & Microalgae	-4.64367	Aruoja et al Environ. Sci.: Nano, 2015,2, 630-644
ZnO	70	24 h	EC50	9.4	0.000116049	Tetrahymena thermophila	Eukaryotes & Microalgae	-3.93536	Blinova et al. / Environmental Pollution 158 (2010) 41–4744
ZnO	70	24 h	EC50	16.4	0.000202469	Tetrahymena thermophila	Eukaryotes & Microalgae	-3.69364	Blinova et al. / Environmental Pollution 158 (2010) 41–4744
ZnO	70	24 h	EC50	12.4	0.000153086	Tetrahymena thermophila	Eukaryotes & Microalgae	-3.81506	Blinova et al. / Environmental Pollution 158 (2010) 41–4744
ZnO	70	24 h	EC50	26.5	0.00032716	Tetrahymena thermophila	Eukaryotes & Microalgae	-3.48524	Blinova et al. / Environmental Pollution 158 (2010) 41–4744
ZnO	13.6	24 h	ec50	3.9	4.81481e-05	Tetrahymena thermophila	Eukaryotes & Microalgae	-4.31742	Bondarenko et al. Nanotoxicology, 2016; 10(9): 1229–1242
ZnO	20	6 h	EC50	8.83	0.000109012	Saccharomyces cerevisae	Eukaryotes & Microalgae	-3.96252	Zhang et al., J Nanopart Res (2016) 18 (2), 372
ZnO	20	48 h	EC50	3.13	3.8642e-05	Saccharomyces cerevisae	Eukaryotes & Microalgae	-4.41294	Zhang et al., J Nanopart Res (2016) 18 (2), 372
ZrO2	20-30	10 h	IC50	1000	0.00813008	Saccharomyces cerevisae	Eukaryotes & Microalgae	-2.08991	Otero-González et al. / Chemosphere 93 (2013) 1201–1206
ZrO2	20-30	10 h	IC50	1000	0.00813008	Saccharomyces cerevisae	Eukaryotes & Microalgae	-2.08991	Otero-González et al. / Chemosphere 93 (2013) 1201–1206
ZrO2	20-30	10 h	EC50	1000	0.00813008	Saccharomyces cerevisae	Eukaryotes & Microalgae	-2.08991	Otero-González et al. / Chemosphere 93 (2013) 1201–1206

## Sheet: Fish
NP	Size	Exposure time	Endpoint	Value (mg/l	Value(mol/L)	Cell type	Cell group	Log(endpoint)	reference
Ag	26.6	48 h	LC50	7.07	6.5463e-05	Danio rerio (adults)	Fish	-4.184	Griffit et al. Environm. Toxicol. Chem. 2008; 27 (9) 1972–1978
Ag		48 h	LC50	2.9	2.68519e-05	Danio rerio (adults)	Fish	-4.57103	Kovrižnychet al. Interdisciplinary Toxicology. 2013; Vol. 6(2): 67–73
Ag		48 h	LC50	2.7	2.5e-05	Danio rerio (eggs)	Fish	-4.60206	Kovrižnychet al. Interdisciplinary Toxicology. 2013; Vol. 6(2): 67–73
Ag	3	120 h	LC50	10.0775	9.331e-05	Danio rerio (embryos)	Fish	-4.03007	Bar-Ilan et al. Small 2009; 5 (16) 1897-1910
Ag	10	120 h	LC50	13.5713	0.00012566	Danio rerio (embryos)	Fish	-3.9008	Bar-Ilan et al. Small 2009; 5 (16) 1897-1910
Ag	50	120 h	LC50	13.7117	0.00012696	Danio rerio (embryos)	Fish	-3.89633	Bar-Ilan et al. Small 2009; 5 (16) 1897-1910
Ag	100	120 h	LC50	14.8241	0.00013726	Danio rerio (embryos)	Fish	-3.86246	Bar-Ilan et al. Small 2009; 5 (16) 1897-1910
Ag	26.6	48 h	LC50	7.2	6.66667e-05	Danio rerio (juvenile)	Fish	-4.17609	Griffit et al. Environm. Toxicol. Chem. 2008; 27 (9) 1972–1978
Ag	20	120 h	LC50	0.529	4.89815e-06	Danio rerio embryos	Fish	-5.30997	Lacave et al. Nanotechnology 27 (2016) 325102
Ag	40	120 h	LC50	3.94	3.64815e-05	Danio rerio embryos	Fish	-4.43793	Lacave et al. Nanotechnology 27 (2016) 325102
Ag	100	120 h	LC50	1.973	1.82685e-05	Danio rerio embryos	Fish	-4.7383	Lacave et al. Nanotechnology 27 (2016) 325102
Ag	20	24 h	ec50	15	0.000138889	RTgutGC	Fish	-3.85733	Geppert et al. Environ. Sci.: Nano, 2021,8, 2249-2260
Ag	20.4	96 h	ec50	3	2.77778e-05	zebrafish (danio rerio)	Fish	-4.5563	Bondarenko et al. Nanotoxicology, 2016; 10(9): 1229–1242
Al2O3	<50	48 h	LC50	800	0.00784314	Danio rerio (adults)	Fish	-2.10551	Kovrižnychet al. Interdisciplinary Toxicology. 2013; Vol. 6(2): 67–73
Al2O3	<50	48 h	LC50	800	0.00784314	Danio rerio (eggs)	Fish	-2.10551	Kovrižnychet al. Interdisciplinary Toxicology. 2013; Vol. 6(2): 67–73
Al2O3	80	96 h	LC50	1000	0.00980392	Danio rerio (embryos)	Fish	-2.0086	Zhu et al., J. Environ. Sci. Health A Tox. Hazard Subst. Environ. Eng. 2008; 43 (3) 278-286
Al2O3	80	84 h	eC50	1000	0.00980392	Danio rerio (embryos)	Fish	-2.0086	Zhu et al., J. Environ. Sci. Health A Tox. Hazard Subst. Environ. Eng. 2008; 43 (3) 278-287
Au	5	120 h	LC50	24.655	0.000125152	Danio rerio embryos	Fish	-3.90256	Lacave et al. Nanotechnology 27 (2016) 325102
Au	15	120 h	LC50	24.61	0.000124924	Danio rerio embryos	Fish	-3.90335	Lacave et al. Nanotechnology 27 (2016) 325102
Au	40	120 h	LC50	34.717	0.000176228	Danio rerio embryos	Fish	-3.75392	Lacave et al. Nanotechnology 27 (2016) 325102
Bi2O3	<100	48 h	LC50	1600	0.00343348	Danio rerio (adults)	Fish	-2.46427	Kovrižnychet al. Interdisciplinary Toxicology. 2013; Vol. 6(2): 67–73
Bi2O3	<100	48 h	LC50	1600	0.00343348	Danio rerio (eggs)	Fish	-2.46427	Kovrižnychet al. Interdisciplinary Toxicology. 2013; Vol. 6(2): 67–73
CaO	<160	48 h	LC50	260	0.00464286	Danio rerio (adults)	Fish	-2.33321	Kovrižnychet al. Interdisciplinary Toxicology. 2013; Vol. 6(2): 67–73
CaO	<160	48 h	LC50	290	0.00517857	Danio rerio (eggs)	Fish	-2.28579	Kovrižnychet al. Interdisciplinary Toxicology. 2013; Vol. 6(2): 67–73
Cr2O3		48 h	LC50	1600	0.0105263	Danio rerio (adults)	Fish	-1.97772	Kovrižnychet al. Interdisciplinary Toxicology. 2013; Vol. 6(2): 67–73
Cr2O3		48 h	LC50	1600	0.0105263	Danio rerio (eggs)	Fish	-1.97772	Kovrižnychet al. Interdisciplinary Toxicology. 2013; Vol. 6(2): 67–73
Cu	26.7	48 h	LC50	0.94	1.46875e-05	Danio rerio (adults)	Fish	-4.83305	Griffit et al. Environm. Toxicol. Chem. 2008; 27 (9) 1972–1978
Cu	<100	48 h	LC50	4.2	6.5625e-05	Danio rerio (adults)	Fish	-4.18293	Kovrižnychet al. Interdisciplinary Toxicology. 2013; Vol. 6(2): 67–73
Cu	<100	48 h	LC50	24	0.000375	Danio rerio (eggs)	Fish	-3.42597	Kovrižnychet al. Interdisciplinary Toxicology. 2013; Vol. 6(2): 67–73
Cu	26.7	48 h	LC50	0.71	1.10937e-05	Danio rerio (juvenile)	Fish	-4.95492	Griffit et al. Environm. Toxicol. Chem. 2008; 27 (9) 1972–1978
CuO	<50	48 h	LC50	12.5	0.000157144	Danio rerio (adults)	Fish	-3.8037	Kovrižnychet al. Interdisciplinary Toxicology. 2013; Vol. 6(2): 67–73
CuO	<50	48 h	LC50	960	0.0120686	Danio rerio (eggs)	Fish	-1.91834	Kovrižnychet al. Interdisciplinary Toxicology. 2013; Vol. 6(2): 67–73
CuO	25	24 h	ec50	5.95	7.48004e-05	RTgutGC	Fish	-4.1261	Geppert et al. Environ. Sci.: Nano, 2021,8, 2249-2260
CuO	24.5	96 h	ec50	1.6	2.01144e-05	zebrafish (danio rerio)	Fish	-4.69649	Bondarenko et al. Nanotoxicology, 2016; 10(9): 1229–1242
Fe2O3	<50	48 h	LC50	1600	0.01	Danio rerio (adults)	Fish	-2	Kovrižnychet al. Interdisciplinary Toxicology. 2013; Vol. 6(2): 67–73
Fe2O3	<50	48 h	LC50	1600	0.01	Danio rerio (eggs)	Fish	-2	Kovrižnychet al. Interdisciplinary Toxicology. 2013; Vol. 6(2): 67–73
MgO	<50	48 h	LC50	140	0.0035	Danio rerio (adults)	Fish	-2.45593	Kovrižnychet al. Interdisciplinary Toxicology. 2013; Vol. 6(2): 67–73
MgO	<50	48 h	LC50	3200	0.08	Danio rerio (eggs)	Fish	-1.09691	Kovrižnychet al. Interdisciplinary Toxicology. 2013; Vol. 6(2): 67–73
NiO		48 h	LC50	200	0.00266667	Danio rerio (adults)	Fish	-2.57403	Kovrižnychet al. Interdisciplinary Toxicology. 2013; Vol. 6(2): 67–73
NiO		48 h	LC50	800	0.0106667	Danio rerio (eggs)	Fish	-1.97197	Kovrižnychet al. Interdisciplinary Toxicology. 2013; Vol. 6(2): 67–73
SiO2		48 h	LC50	1600	0.0266667	Danio rerio (adults)	Fish	-1.57403	Kovrižnychet al. Interdisciplinary Toxicology. 2013; Vol. 6(2): 67–73
SiO2		48 h	LC50	1600	0.0266667	Danio rerio (eggs)	Fish	-1.57403	Kovrižnychet al. Interdisciplinary Toxicology. 2013; Vol. 6(2): 67–73
SiO2	70	120 h	LC50	83.33	0.00138883	Danio rerio embryos	Fish	-2.85735	Lacave et al. Nanotechnology 27 (2016) 325102
SiO2	15	120 h	LC50	>100	#VALUE!	Danio rerio embryos	Fish	#VALUE!	Lacave et al. Nanotechnology 27 (2016) 325102
SiO2	30	120 h	LC50	>100	#VALUE!	Danio rerio embryos	Fish	#VALUE!	Lacave et al. Nanotechnology 27 (2016) 325102
SiO2	15	24 h	LC50	>100	#VALUE!	gill cells	Fish	#VALUE!	Katsumiti et al. Nanotoxicology. 2016;10(2):185-96
SiO2	27	24 h	LC50	>100	#VALUE!	gill cells	Fish	#VALUE!	Katsumiti et al. Nanotoxicology. 2016;10(2):185-99
SiO2	30	24 h	LC50	>100	#VALUE!	gill cells	Fish	#VALUE!	Katsumiti et al. Nanotoxicology. 2016;10(2):185-97
SiO2	70	24 h	LC50	>100	#VALUE!	gill cells	Fish	#VALUE!	Katsumiti et al. Nanotoxicology. 2016;10(2):185-98
Sn	<150	48 h	LC50	800	0.00672269	Danio rerio (adults)	Fish	-2.17246	Kovrižnychet al. Interdisciplinary Toxicology. 2013; Vol. 6(2): 67–73
Sn	<150	48 h	LC50	800	0.00672269	Danio rerio (eggs)	Fish	-2.17246	Kovrižnychet al. Interdisciplinary Toxicology. 2013; Vol. 6(2): 67–73
SnO2	<100	48 h	LC50	1600	0.010596	Danio rerio (adults)	Fish	-1.97486	Kovrižnychet al. Interdisciplinary Toxicology. 2013; Vol. 6(2): 67–73
SnO2	<100	48 h	LC50	1600	0.010596	Danio rerio (eggs)	Fish	-1.97486	Kovrižnychet al. Interdisciplinary Toxicology. 2013; Vol. 6(2): 67–73
TiO2	<100	48 h	LC50	1600	0.02	Danio rerio (adults)	Fish	-1.69897	Kovrižnychet al. Interdisciplinary Toxicology. 2013; Vol. 6(2): 67–73
TiO2	<100	48 h	LC50	1600	0.02	Danio rerio (eggs)	Fish	-1.69897	Kovrižnychet al. Interdisciplinary Toxicology. 2013; Vol. 6(2): 67–73
TiO2	<20	96 h	LC50	500	0.00625	Danio rerio (embryos)	Fish	-2.20412	Zhu et al., J. Environ. Sci. Health A Tox. Hazard Subst. Environ. Eng. 2008; 43 (3) 278-288
TiO2	<20	84 h	eC50	500	0.00625	Danio rerio (embryos)	Fish	-2.20412	Zhu et al., J. Environ. Sci. Health A Tox. Hazard Subst. Environ. Eng. 2008; 43 (3) 278-289
TiO2	<5	24 h	ec50	>100	#VALUE!	RTgutGC	Fish	#VALUE!	Geppert et al. Environ. Sci.: Nano, 2021,8, 2249-2260
TiO2	5	96 h	ec50	>100	#VALUE!	zebrafish (danio rerio)	Fish	#VALUE!	Bondarenko et al. Nanotoxicology, 2016; 10(9): 1229–1242
W	<150	48 h	LC50	1600	0.00869565	Danio rerio (adults)	Fish	-2.0607	Kovrižnychet al. Interdisciplinary Toxicology. 2013; Vol. 6(2): 67–73
W	<150	48 h	LC50	1600	0.00869565	Danio rerio (eggs)	Fish	-2.0607	Kovrižnychet al. Interdisciplinary Toxicology. 2013; Vol. 6(2): 67–73
WO3	<100	48 h	LC50	1600	0.00689655	Danio rerio (adults)	Fish	-2.16137	Kovrižnychet al. Interdisciplinary Toxicology. 2013; Vol. 6(2): 67–73
WO3	<100	48 h	LC50	1600	0.00689655	Danio rerio (eggs)	Fish	-2.16137	Kovrižnychet al. Interdisciplinary Toxicology. 2013; Vol. 6(2): 67–73
ZnO	8.35	5 days	LC50	9.1	0.000112346	Danio rerio (embryos)	Fish	-3.94944	Wehmas et al. Toxicology Reports 2 (2015) 702–717
ZnO	8.35	4 days	LC50	3.5	4.32099e-05	Danio rerio (embryos)	Fish	-4.36442	Wehmas et al. Toxicology Reports 2 (2015) 702–717
ZnO	20	96 h	LC50	1.78401	2.20249e-05	Danio rerio (embryos)	Fish	-4.65709	Zhu et al., J. Environ. Sci. Health A Tox. Hazard Subst. Environ. Eng. 2008; 43 (3) 278-284
ZnO	20	84 h	eC50	2.05465	2.53661e-05	Danio rerio (embryos)	Fish	-4.59575	Zhu et al., J. Environ. Sci. Health A Tox. Hazard Subst. Environ. Eng. 2008; 43 (3) 278-285
ZnO	<130	120 h	LC50	4.289	5.29506e-05	Danio rerio embryos	Fish	-4.27613	Lacave et al. Nanotechnology 27 (2016) 325102
ZnO	<180	120 h	LC50	5.538	6.83704e-05	Danio rerio embryos	Fish	-4.16513	Lacave et al. Nanotechnology 27 (2016) 325102
ZnO	<130	24 h	LC50	12.7	0.000165568	gill cells	Fish	-3.78102	Katsumiti et al. Nanotoxicology. 2016;10(2):185-100
ZnO	<280	24 h	LC50	38.296	0.000487457	gill cells	Fish	-3.31206	Katsumiti et al. Nanotoxicology. 2016;10(2):185-101
ZnO	30-70	24 h	LC50	4.04	4.77778e-05	gill cells	Fish	-4.32077	Katsumiti et al. Nanotoxicology. 2016;10(2):185-102
ZnO	14	24 h	ec50	100	0.00123457	RTgutGC	Fish	-2.90849	Geppert et al. Environ. Sci.: Nano, 2021,8, 2249-2260

## Sheet: Human cells
NP	Size	Exposure time	Endpoint	Value (mg/l	Value(mol/L)	Cell type	Cell group	Log(endpoint)	reference
Ag	5	24 h	EC50	1	9.25926e-06	A549	Human cells	-5.03342	Liu et al. Nanotoxicology, 2010; 4(3): 319–330
Ag	5	24 h	EC50	0.59	5.46296e-06	HepG2	Human cells	-5.26257	Liu et al. Nanotoxicology, 2010; 4(3): 319–330
Ag	5	24 h	EC50	0.5	4.62963e-06	MCF‐7	Human cells	-5.33445	Liu et al. Nanotoxicology, 2010; 4(3): 319–330
Ag	5	24 h	EC50	9.9	9.16667e-05	SGC‐7901	Human cells	-4.03779	Liu et al. Nanotoxicology, 2010; 4(3): 319–330
Ag	20	24 h	EC50	9.96	9.22222e-05	A549	Human cells	-4.03516	Liu et al. Nanotoxicology, 2010; 4(3): 319–330
Ag	20	24 h	EC50	25.5	0.000236111	HepG2	Human cells	-3.62688	Liu et al. Nanotoxicology, 2010; 4(3): 319–330
Ag	20	24 h	EC50	14.3	0.000132407	MCF‐7	Human cells	-3.87809	Liu et al. Nanotoxicology, 2010; 4(3): 319–330
Ag	20	24 h	EC50	50.9	0.000471296	SGC‐7901	Human cells	-3.32671	Liu et al. Nanotoxicology, 2010; 4(3): 319–330
Ag	20.4	24 h	ec50	6.4	5.92593e-05	human mesenchymal stem cells	Human cells	-4.22724	Bondarenko et al. Nanotoxicology, 2016; 10(9): 1229–1242
Ag	20.4	24 h	ec50	4.6	4.25926e-05	human mesenchymal stem cells (MTT)	Human cells	-4.37067	Bondarenko et al. Nanotoxicology, 2016; 10(9): 1229–1242
Ag	50	24 h	EC50	13.3	0.000123148	A549	Human cells	-3.90957	Liu et al. Nanotoxicology, 2010; 4(3): 319–330
Ag	50	24 h	LD50	48.2	0.00185185	Hacat cells	Human cells	-2.73239	Comfort et al. Colloids Surf B Biointerfaces,2014;123:136-42
Ag	50	24 h	EC50	33.6	0.000311111	HepG2	Human cells	-3.50708	Liu et al. Nanotoxicology, 2010; 4(3): 319–330
Ag	50	24 h	EC50	47.6	0.000440741	MCF‐7	Human cells	-3.35582	Liu et al. Nanotoxicology, 2010; 4(3): 319–330
Ag	50	24 h	EC50	112	0.00103704	SGC‐7901	Human cells	-2.98421	Liu et al. Nanotoxicology, 2010; 4(3): 319–330
Ag	312	24 h	IC50	42.67	0.000395093	a549	Human cells	-3.4033	Lanone et al. Particle and Fibre Toxicology 2009, 6:14
Ag	312	24 h	IC50	380.9	0.00352685	a549	Human cells	-2.45261	Lanone et al. Particle and Fibre Toxicology 2009, 6:25
Ag	312	24 h	IC50	19.33	0.000178981	THP-1	Human cells	-3.74719	Lanone et al. Particle and Fibre Toxicology 2009, 6:14
Ag	312	24 h	IC50	55.6	0.000514815	THP-1	Human cells	-3.28835	Lanone et al. Particle and Fibre Toxicology 2009, 6:14
Ag	312	24 h	IC50	1408	0.013037	THP-1	Human cells	-1.88482	Lanone et al. Particle and Fibre Toxicology 2009, 6:14
Ag	312	24 h	IC50	18.36	0.00017	THP-1	Human cells	-3.76955	Lanone et al. Particle and Fibre Toxicology 2009, 6:29
Ag	312	24 h	IC50	27.6	0.000255556	THP-1	Human cells	-3.59251	Lanone et al. Particle and Fibre Toxicology 2009, 6:29
Ag	-	24 h	EC50	78.9	0.000730556	HeLa cells	Human cells	-3.13635	Kim et al. Bull. Korean Chem. Soc. 2012, Vol. 33, No. 10
Ag	-	24 h	EC50	88.6	0.00082037	PC3	Human cells	-3.08599	Kim et al. Bull. Korean Chem. Soc. 2012, Vol. 33, No. 10
Al2O3	11.9	24 h	EC50	705.668	0.00691831	A549 cells	Human cells	-2.16	Cao et al. Green Chem., 2020,22, 3512-3521
Al2O3	14.7	24 h	EC50	>200	#VALUE!	BEAS-2B cells, ATP assay	Human cells	#VALUE!	Zhang et al. ACS Nano 2012, 6, 5, 4349–4368
Al2O3	14.7	24 h	EC50	>200	#VALUE!	BEAS-2B cells, MTS assay	Human cells	#VALUE!	Zhang et al. ACS Nano 2012, 6, 5, 4349–4368
Al2O3	31	24 h	ec50	1000	0.00980392	A549	Human cells	-2.0086	Horie et al. Metallomics, 2012, 4, 350–360
Al2O3	31	24 h	ec50	1000	0.00980392	Hacat	Human cells	-2.0086	Horie et al. Metallomics, 2012, 4, 350–360
Al2O3	44	24 h	LC50	1439	0.0141078	Hacat cells	Human cells	-1.85054	Gajewicz et al. Nanotoxicology, 2015;9(3):313-25
Al2O3	40-68	24 h	IC50	866	0.0084902	THP-1	Human cells	-2.07108	Lanone et al. Particle and Fibre Toxicology 2009, 6:14
Al2O3	40-68	24 h	IC50	82.19	0.000805784	THP-1	Human cells	-3.09378	Lanone et al. Particle and Fibre Toxicology 2009, 6:14
Al2O3	40-68	24 h	IC50	672.5	0.00659314	THP-1	Human cells	-2.18091	Lanone et al. Particle and Fibre Toxicology 2009, 6:29
Al2O3	28.15	24 h	ec50 (in SFM medium)	>150	#VALUE!	A549 cells	Human cells	#VALUE!	Areecheewakul, et al. NanoImpact 18 (2020) 100214
Al2O3	28.15	24 h	ec50 (in SCM medium)	>150	#VALUE!	A549 cells	Human cells	#VALUE!	Areecheewakul, et al. NanoImpact 18 (2020) 100214
Au	-	24 h	EC50	66.4	0.000337056	HeLa cells	Human cells	-3.4723	Kim et al. Bull. Korean Chem. Soc. 2012, Vol. 33, No. 10
Au	-	24 h	EC50	82.9	0.000420812	PC3	Human cells	-3.37591	Kim et al. Bull. Korean Chem. Soc. 2012, Vol. 33, No. 10
Bi2O3	90	24 h	LC50	1459	0.0031309	Hacat cells	Human cells	-2.50433	Gajewicz et al. Nanotoxicology, 2015;9(3):313-25
Bi2O3	149	24 h	LC50	25	5.36481e-05	HepG2	Human cells	-4.27045	Abudayyak et al. / Chemosphere 169 (2017) 117e123118
Bi2O3	149	24 h	LC50	100	0.000214592	NRK-52E	Human cells	-3.66839	Abudayyak et al. / Chemosphere 169 (2017) 117e123118
Bi2O3	149	24 h	LC50	100	0.000214592	Caco-2	Human cells	-3.66839	Abudayyak et al. / Chemosphere 169 (2017) 117e123118
Bi2O3	149	24 h	LC50	25	5.36481e-05	A549	Human cells	-4.27045	Abudayyak et al. / Chemosphere 169 (2017) 117e123118
Bi2O3	149	24 h	LC50	100	0.000214592	HepG2	Human cells	-3.66839	Abudayyak et al. / Chemosphere 169 (2017) 117e123118
Bi2O3	149	24 h	LC50	100	0.000214592	NRK-52E	Human cells	-3.66839	Abudayyak et al. / Chemosphere 169 (2017) 117e123118
Bi2O3	149	24 h	LC50	75	0.000160944	Caco-2	Human cells	-3.79332	Abudayyak et al. / Chemosphere 169 (2017) 117e123118
Bi2O3	149	24 h	LC50	75	0.000160944	A549	Human cells	-3.79332	Abudayyak et al. / Chemosphere 169 (2017) 117e123118
Bi2O3	164.97	24 h	EC50	337.587	0.000724436	A549 cells	Human cells	-3.14	Cao et al. Green Chem., 2020,22, 3512-3521
CeO2	14	24 h	ec50	1000	0.00581395	A549	Human cells	-2.23553	Horie et al. Metallomics, 2012, 4, 350–360
CeO2	14	24 h	ec50	1000	0.00581395	Hacat	Human cells	-2.23553	Horie et al. Metallomics, 2012, 4, 350–360
CeO2	15.38	24 h	EC50	1885.94	0.0109648	A549 cells	Human cells	-1.96	Cao et al. Green Chem., 2020,22, 3512-3521
CeO2	33.4	24 h	IC50	1058	0.00615116	THP-1	Human cells	-2.21104	Lanone et al. Particle and Fibre Toxicology 2009, 6:14
CeO2	33.4	24 h	IC50	476.6	0.00277093	THP-1	Human cells	-2.55737	Lanone et al. Particle and Fibre Toxicology 2009, 6:29
CeO2	-	24 h	LD 50	1000	0.00581395	A549	Human cells	-2.23553	Lozano et al 2011 J. Phys.: Conf. Ser. 304 012046
CeO2	-	48 h	LD 50	1000	0.00581395	A549	Human cells	-2.23553	Lozano et al 2011 J. Phys.: Conf. Ser. 304 012046
CeO2	-	24 h	LD 50	1000	0.00581395	HeLa cells	Human cells	-2.23553	Lozano et al 2011 J. Phys.: Conf. Ser. 304 012046
CeO2	-	48 h	LD 50	1000	0.00581395	HeLa cells	Human cells	-2.23553	Lozano et al 2011 J. Phys.: Conf. Ser. 304 012046
CeO2	-	24 h	LD 50	1000	0.00581395	NCl H460	Human cells	-2.23553	Lozano et al 2011 J. Phys.: Conf. Ser. 304 012046
CeO2	-	48 h	LD 50	1000	0.00581395	NCl H460	Human cells	-2.23553	Lozano et al 2011 J. Phys.: Conf. Ser. 304 012046
CeO2	-	24 h	LD 50	1000	0.00581395	SK- MES 1	Human cells	-2.23553	Lozano et al 2011 J. Phys.: Conf. Ser. 304 012046
CeO2	-	48 h	LD 50	1000	0.00581395	SK- MES 1	Human cells	-2.23553	Lozano et al 2011 J. Phys.: Conf. Ser. 304 012046
Co	20	24 h	IC50	1142	0.0193559	a549	Human cells	-1.71319	Lanone et al. Particle and Fibre Toxicology 2009, 6:14
Co	20	24 h	IC50	3039	0.0515085	a549	Human cells	-1.28812	Lanone et al. Particle and Fibre Toxicology 2009, 6:14
Co	20	24 h	IC50	1243	0.0210678	a549	Human cells	-1.67638	Lanone et al. Particle and Fibre Toxicology 2009, 6:26
Co	20	24 h	IC50	241.6	0.00409492	a549	Human cells	-2.38776	Lanone et al. Particle and Fibre Toxicology 2009, 6:27
Co	20	24 h	IC50	1.42	2.40678e-05	THP-1	Human cells	-4.61856	Lanone et al. Particle and Fibre Toxicology 2009, 6:14
Co	20	24 h	IC50	69.6	0.00117966	THP-1	Human cells	-2.92824	Lanone et al. Particle and Fibre Toxicology 2009, 6:14
Co	20	24 h	IC50	164.7	0.00279153	THP-1	Human cells	-2.55416	Lanone et al. Particle and Fibre Toxicology 2009, 6:29
Co	-	24 h	EC50	71.8	0.00121695	HeLa cells	Human cells	-2.91473	Kim et al. Bull. Korean Chem. Soc. 2012, Vol. 33, No. 10
Co	-	24 h	EC50	77.5	0.00131356	PC3	Human cells	-2.88155	Kim et al. Bull. Korean Chem. Soc. 2012, Vol. 33, No. 10
Co3O4	9.2	24 h	IC50	130.9	0.000543154	A549	Human cells	-3.26508	Ivansk et al. Curr Top Med Chem., 2015;15(18):1914-29
Co3O4	9.2	24 h	IC50	123	0.000510373	Caco2	Human cells	-3.29211	Ivansk et al. Curr Top Med Chem., 2015;15(18):1914-29
Co3O4	10	24 h	EC50	23.4423	9.72709e-05	BEAS-2B cells, ATP assay	Human cells	-4.01202	Zhang et al. ACS Nano 2012, 6, 5, 4349–4368
Co3O4	22.36	24 h	EC50	264.251	0.00109648	A549 cells	Human cells	-2.96	Cao et al. Green Chem., 2020,22, 3512-3521
Co3O4	-	12 h	ec50	105.4	0.000437344	A549	Human cells	-3.35918	Titma et al. Cytotechnology. 2016;68(6):2363-2377
Co3O4	-	108	ec50	107.3	0.000445228	A549	Human cells	-3.35142	Titma et al. Cytotechnology. 2016;68(6):2363-2377
Co3O4	-	36 h	ec50	108.1	0.000448548	A549	Human cells	-3.34819	Titma et al. Cytotechnology. 2016;68(6):2363-2377
Co3O4	-	60 h	ec50	109.8	0.000455602	A549	Human cells	-3.34141	Titma et al. Cytotechnology. 2016;68(6):2363-2377
Co3O4	<50	7 days	EC50	8.917	3.7e-05	HaCaT cells	Human cells	-4.4318	Mauro et al. Int. J. Environ. Res. Public Health 2015, 12, 8263-8280
Co3O4	<50	24 h	EC50	241	0.001	HaCaT cells	Human cells	-3	Mauro et al. Int. J. Environ. Res. Public Health 2015, 12, 8263-8280
Co3O4	<50	48 h	EC50	241	0.001	HaCaT cells	Human cells	-3	Mauro et al. Int. J. Environ. Res. Public Health 2015, 12, 8263-8280
Co3O4	<50	7 days	EC50	31.33	0.00013	HaCaT cells	Human cells	-3.88606	Mauro et al. Int. J. Environ. Res. Public Health 2015, 12, 8263-8280
Co3O4	<50	24 h	EC50	241	0.001	HaCaT cells	Human cells	-3	Mauro et al. Int. J. Environ. Res. Public Health 2015, 12, 8263-8280
Co3O4	<50	48 h	EC50	241	0.001	HaCaT cells	Human cells	-3	Mauro et al. Int. J. Environ. Res. Public Health 2015, 12, 8263-8280
CoO	50	24 h	EC50	12.5	0.000166667	BEAS-2B	Human cells	-3.77815	Huang et al. Materials 2010, 3, 4842-4859;
CoO	71.8	24 h	EC50	43.6516	0.000582021	BEAS-2B cells, ATP assay	Human cells	-3.23506	Zhang et al. ACS Nano 2012, 6, 5, 4349–4368
CoO	71.8	24 h	EC50	51.2861	0.000683815	BEAS-2B cells, MTS assay	Human cells	-3.16506	Zhang et al. ACS Nano 2012, 6, 5, 4349–4368
CoO	75	24 h	EC50	157.5	0.0021	A549 CELLS	Human cells	-2.67778	Jeong et al. Front Pharmacol. 2018 22;9:15.
CoO	75	24 h	EC50	60	0.0008	THP-1 CELLS	Human cells	-3.09691	Jeong et al. Front Pharmacol. 2018 22;9:15.
CoO	<100	24 h	LC50	110	0.00146667	Hacat cells	Human cells	-2.83367	Gajewicz et al. Nanotoxicology, 2015;9(3):313-25
Cr2O3	60	24 h	LC50	455	0.00299342	Hacat cells	Human cells	-2.52383	Gajewicz et al. Nanotoxicology, 2015;9(3):313-25
Cr2O3	61.38	24 h	EC50	115.304	0.000758578	A549 cells	Human cells	-3.12	Cao et al. Green Chem., 2020,22, 3512-3521
Cr2O3	193	24 h	EC50	35.4813	0.00023343	BEAS-2B cells, ATP assay	Human cells	-3.63184	Zhang et al. ACS Nano 2012, 6, 5, 4349–4368
Cr2O3	193	24 h	EC50	338.844	0.00222924	BEAS-2B cells, MTS assay	Human cells	-2.65184	Zhang et al. ACS Nano 2012, 6, 5, 4349–4368
Cu	22.9	24 h	IC50	13.49	0.000210781	a549	Human cells	-3.67617	Lanone et al. Particle and Fibre Toxicology 2009, 6:14
Cu	22.9	24 h	IC50	17.04	0.00026625	a549	Human cells	-3.57471	Lanone et al. Particle and Fibre Toxicology 2009, 6:14
Cu	22.9	24 h	IC50	1698	0.0265312	a549	Human cells	-1.57624	Lanone et al. Particle and Fibre Toxicology 2009, 6:17
Cu	22.9	24 h	IC50	70.79	0.00110609	a549	Human cells	-2.95621	Lanone et al. Particle and Fibre Toxicology 2009, 6:18
Cu	22.9	24 h	IC50	1.65	2.57812e-05	THP-1	Human cells	-4.5887	Lanone et al. Particle and Fibre Toxicology 2009, 6:14
Cu	22.9	24 h	IC50	6.46	0.000100937	THP-1	Human cells	-3.99595	Lanone et al. Particle and Fibre Toxicology 2009, 6:14
Cu	22.9	24 h	IC50	114.7	0.00179219	THP-1	Human cells	-2.74662	Lanone et al. Particle and Fibre Toxicology 2009, 6:29
Cu	22.9	24 h	IC50	13.15	0.000205469	THP-1	Human cells	-3.68725	Lanone et al. Particle and Fibre Toxicology 2009, 6:29
Cu	90	24 h	IC50	33.74	0.000527187	a549	Human cells	-3.27803	Lanone et al. Particle and Fibre Toxicology 2009, 6:14
Cu	90	24 h	IC50	48.13	0.000752031	a549	Human cells	-3.12376	Lanone et al. Particle and Fibre Toxicology 2009, 6:14
Cu	90	24 h	IC50	74.95	0.00117109	a549	Human cells	-2.93141	Lanone et al. Particle and Fibre Toxicology 2009, 6:15
Cu	90	24 h	IC50	31.27	0.000488594	a549	Human cells	-3.31105	Lanone et al. Particle and Fibre Toxicology 2009, 6:16
Cu	90	24 h	IC50	5.29	8.26563e-05	THP-1	Human cells	-4.08272	Lanone et al. Particle and Fibre Toxicology 2009, 6:14
Cu	90	24 h	IC50	6.59	0.000102969	THP-1	Human cells	-3.98729	Lanone et al. Particle and Fibre Toxicology 2009, 6:14
Cu	90	24 h	IC50	5.7	8.90625e-05	THP-1	Human cells	-4.05031	Lanone et al. Particle and Fibre Toxicology 2009, 6:29
Cu	90	24 h	IC50	0.39	6.09375e-06	THP-1	Human cells	-5.21512	Lanone et al. Particle and Fibre Toxicology 2009, 6:29
Cu	-	24 h	EC50	85.5	0.00133594	HeLa cells	Human cells	-2.87421	Kim et al. Bull. Korean Chem. Soc. 2012, Vol. 33, No. 10
Cu	-	24 h	EC50	91.7	0.00143281	PC3	Human cells	-2.84381	Kim et al. Bull. Korean Chem. Soc. 2012, Vol. 33, No. 10
Cu2O	83-94	24 h	IC50	45	0.000314685	a549	Human cells	-3.50212	Lanone et al. Particle and Fibre Toxicology 2009, 6:14
Cu2O	83-94	24 h	IC50	52.52	0.000367273	a549	Human cells	-3.43501	Lanone et al. Particle and Fibre Toxicology 2009, 6:14
Cu2O	83-94	24 h	IC50	39.96	0.000279441	a549	Human cells	-3.55371	Lanone et al. Particle and Fibre Toxicology 2009, 6:19
Cu2O	83-94	24 h	IC50	164.7	0.00115175	a549	Human cells	-2.93864	Lanone et al. Particle and Fibre Toxicology 2009, 6:20
Cu2O	83-94	24 h	IC50	3.42	2.39161e-05	THP-1	Human cells	-4.62131	Lanone et al. Particle and Fibre Toxicology 2009, 6:14
Cu2O	83-94	24 h	IC50	11.53	8.06294e-05	THP-1	Human cells	-4.09351	Lanone et al. Particle and Fibre Toxicology 2009, 6:14
Cu2O	83-94	24 h	IC50	8.15	5.6993e-05	THP-1	Human cells	-4.24418	Lanone et al. Particle and Fibre Toxicology 2009, 6:29
Cu2O	83-94	24 h	IC50	2.93	2.04895e-05	THP-1	Human cells	-4.68847	Lanone et al. Particle and Fibre Toxicology 2009, 6:29
CuO	11.9	24 h	IC50	18.9	0.000237601	A549	Human cells	-3.62415	Ivansk et al. Curr Top Med Chem., 2015;15(18):1914-29
CuO	11.9	24 h	IC50	12.6	0.000158401	Caco2	Human cells	-3.80024	Ivansk et al. Curr Top Med Chem., 2015;15(18):1914-29
CuO	12.8	24 h	EC50	23.9883	0.000301569	BEAS-2B cells, ATP assay	Human cells	-3.52061	Zhang et al. ACS Nano 2012, 6, 5, 4349–4368
CuO	12.8	24 h	EC50	23.9883	0.000301569	BEAS-2B cells, MTS assay	Human cells	-3.52061	Zhang et al. ACS Nano 2012, 6, 5, 4349–4368
CuO	24.5	24 h	ec50	2.2	2.76573e-05	human mesenchymal stem cells	Human cells	-4.55819	Bondarenko et al. Nanotoxicology, 2016; 10(9): 1229–1242
CuO	28.5	24 h	EC50	160	0.002	A549 CELLS	Human cells	-2.69897	Jeong et al. Front Pharmacol. 2018 22;9:15.
CuO	28.5	24 h	EC50	14.4	0.00018	THP-1 CELLS	Human cells	-3.74473	Jeong et al. Front Pharmacol. 2018 22;9:15.
CuO	30	24 h	IC50	10.07	0.000126595	a549	Human cells	-3.89758	Lanone et al. Particle and Fibre Toxicology 2009, 6:14
CuO	30	24 h	IC50	10.82	0.000136024	a549	Human cells	-3.86639	Lanone et al. Particle and Fibre Toxicology 2009, 6:14
CuO	30	24 h	IC50	11.44	0.000143818	a549	Human cells	-3.84219	Lanone et al. Particle and Fibre Toxicology 2009, 6:23
CuO	30	24 h	IC50	20.84	0.00026199	a549	Human cells	-3.58172	Lanone et al. Particle and Fibre Toxicology 2009, 6:24
CuO	30	24 h	IC50	3	3.77145e-05	THP-1	Human cells	-4.42349	Lanone et al. Particle and Fibre Toxicology 2009, 6:14
CuO	30	24 h	IC50	7.3	9.1772e-05	THP-1	Human cells	-4.03729	Lanone et al. Particle and Fibre Toxicology 2009, 6:14
CuO	30	24 h	IC50	17.88	0.000224778	THP-1	Human cells	-3.64825	Lanone et al. Particle and Fibre Toxicology 2009, 6:29
CuO	30	24 h	IC50	4.98	6.26061e-05	THP-1	Human cells	-4.20338	Lanone et al. Particle and Fibre Toxicology 2009, 6:29
CuO	42	18 h	EC50	20	0.00025143	A549	Human cells	-3.59958	Karlsson et al. Chem. Res. Toxicol. 2008, Vol. 21, No. 9
CuO	45.4	24 h	IC50	35.61	0.000447671	a549	Human cells	-3.34904	Lanone et al. Particle and Fibre Toxicology 2009, 6:14
CuO	45.4	24 h	IC50	47.41	0.000596015	a549	Human cells	-3.22474	Lanone et al. Particle and Fibre Toxicology 2009, 6:14
CuO	45.4	24 h	IC50	832.7	0.0104683	a549	Human cells	-1.98012	Lanone et al. Particle and Fibre Toxicology 2009, 6:21
CuO	45.4	24 h	IC50	102.5	0.00128858	a549	Human cells	-2.88989	Lanone et al. Particle and Fibre Toxicology 2009, 6:22
CuO	45.4	24 h	IC50	3.89	4.89031e-05	THP-1	Human cells	-4.31066	Lanone et al. Particle and Fibre Toxicology 2009, 6:14
CuO	45.4	24 h	IC50	31.07	0.000390597	THP-1	Human cells	-3.40827	Lanone et al. Particle and Fibre Toxicology 2009, 6:14
CuO	45.4	24 h	IC50	12.38	0.000155635	THP-1	Human cells	-3.80789	Lanone et al. Particle and Fibre Toxicology 2009, 6:29
CuO	48	24 h	ec50	100	0.00125715	A549	Human cells	-2.90061	Horie et al. Metallomics, 2012, 4, 350–360
CuO	48	24 h	ec50	100	0.00125715	Hacat	Human cells	-2.90061	Horie et al. Metallomics, 2012, 4, 350–360
CuO	50.24	24 h	ec50 (in SFM medium)	5	6.25e-05	A549 cells	Human cells	-4.20412	Areecheewakul, et al. NanoImpact 18 (2020) 100214
CuO	50.24	24 h	ec50 (in SCM medium)	50	0.000625	A549 cells	Human cells	-3.20412	Areecheewakul, et al. NanoImpact 18 (2020) 100214
CuO	50.24	24 h	ec50 (in SCM medium)	7.5	9.375e-05	A549 cells	Human cells	-4.02803	Areecheewakul, et al. NanoImpact 18 (2020) 100214
CuO	50.24	24 h	ec50 (in SFM medium)	75	0.0009375	A549 cells	Human cells	-3.02803	Areecheewakul, et al. NanoImpact 18 (2020) 100214
CuO	-	36 h	ec50	32.1	0.000403545	A549	Human cells	-3.39411	Titma et al. Cytotechnology. 2016;68(6):2363-2377
CuO	-	108	ec50	36.2	0.000455088	A549	Human cells	-3.3419	Titma et al. Cytotechnology. 2016;68(6):2363-2377
CuO	-	216	ec50	37.2	0.00046766	A549	Human cells	-3.33007	Titma et al. Cytotechnology. 2016;68(6):2363-2377
CuO	-	60 h	ec50	37.4	0.000470174	A549	Human cells	-3.32774	Titma et al. Cytotechnology. 2016;68(6):2363-2377
CuO	-	12 h	ec50	38.2	0.000480231	A549	Human cells	-3.31855	Titma et al. Cytotechnology. 2016;68(6):2363-2377
CuO	-	24 h	ec50	43.8	0.000550632	A549	Human cells	-3.25914	Titma et al. Cytotechnology. 2016;68(6):2363-2377
CuO	-	60 h	ec50	30.3	0.000380916	Caco2	Human cells	-3.41917	Titma et al. Cytotechnology. 2016;68(6):2363-2377
CuO	-	108	ec50	31.5	0.000396002	Caco2	Human cells	-3.4023	Titma et al. Cytotechnology. 2016;68(6):2363-2377
CuO	-	216	ec50	37	0.000465146	Caco2	Human cells	-3.33241	Titma et al. Cytotechnology. 2016;68(6):2363-2377
CuO	-	36 h	ec50	38.6	0.00048526	Caco2	Human cells	-3.31403	Titma et al. Cytotechnology. 2016;68(6):2363-2377
CuO	-	24 h	ec50	117.2	0.00147338	Caco2	Human cells	-2.83169	Titma et al. Cytotechnology. 2016;68(6):2363-2377
CuO	>50	24 h	IC50	30	0.000377145	A549	Human cells	-3.42349	Seiffert et al., 2012,Chem. Res. Toxicol., 25, 140–152
CuO	>50	24 h	IC50	30	0.000377145	A549	Human cells	-3.42349	Seiffert et al., 2012,Chem. Res. Toxicol., 25, 140–152
CuO	>50	24 h	IC50	30	0.000377145	A549	Human cells	-3.42349	Seiffert et al., 2012,Chem. Res. Toxicol., 25, 140–152
CuO	>50	24 h	IC50	30	0.000377145	A549	Human cells	-3.42349	Seiffert et al., 2012,Chem. Res. Toxicol., 25, 140–152
CuO	>50	24 h	IC50	30	0.000377145	A549	Human cells	-3.42349	Seiffert et al., 2012,Chem. Res. Toxicol., 25, 140–152
CuO	30-50	24 h	EC50	5	6.28575e-05	BEAS-2B	Human cells	-4.20164	Huang et al. Materials 2010, 3, 4842-4859;
Fe2O3	20.93	24 h	EC50	651.808	0.0040738	A549 cells	Human cells	-2.39	Cao et al. Green Chem., 2020,22, 3512-3521
Fe2O3	32	24 h	LC50	1483	0.00926875	Hacat cells	Human cells	-2.03298	Gajewicz et al. Nanotoxicology, 2015;9(3):313-25
Fe2O3	39	24 h	ec50	1000	0.00625	A549	Human cells	-2.20412	Horie et al. Metallomics, 2012, 4, 350–360
Fe2O3	39	24 h	ec50	1000	0.00625	Hacat	Human cells	-2.20412	Horie et al. Metallomics, 2012, 4, 350–360
Fe2O3	100	24 h	IC50	698	0.0043625	HEK293	Human cells	-2.36026	Dua et al., 2011,Bull. Korean Chem. Soc. Vol. 32, No. 6 2051
Fe2O3	100	48 h	IC50	464	0.0029	HEK293	Human cells	-2.5376	Dua et al., 2011,Bull. Korean Chem. Soc. Vol. 32, No. 6 2051
Fe2O3	-	24 h	LD 50	1000	0.00625	A549	Human cells	-2.20412	Lozano et al 2011 J. Phys.: Conf. Ser. 304 012046
Fe2O3	-	48 h	LD 50	1000	0.00625	A549	Human cells	-2.20412	Lozano et al 2011 J. Phys.: Conf. Ser. 304 012046
Fe2O3	-	24 h	LD 50	1000	0.00625	HeLa cells	Human cells	-2.20412	Lozano et al 2011 J. Phys.: Conf. Ser. 304 012046
Fe2O3	-	48 h	LD 50	1000	0.00625	HeLa cells	Human cells	-2.20412	Lozano et al 2011 J. Phys.: Conf. Ser. 304 012046
Fe2O3	-	24 h	LD 50	1000	0.00625	NCl H460	Human cells	-2.20412	Lozano et al 2011 J. Phys.: Conf. Ser. 304 012046
Fe2O3	-	48 h	LD 50	1000	0.00625	NCl H460	Human cells	-2.20412	Lozano et al 2011 J. Phys.: Conf. Ser. 304 012046
Fe2O3	-	24 h	LD 50	1000	0.00625	SK- MES 1	Human cells	-2.20412	Lozano et al 2011 J. Phys.: Conf. Ser. 304 012046
Fe2O3	-	48 h	LD 50	1000	0.00625	SK- MES 1	Human cells	-2.20412	Lozano et al 2011 J. Phys.: Conf. Ser. 304 012046
Fe2O3	12.3	24 h	EC50	>200	#VALUE!	BEAS-2B cells, ATP assay	Human cells	--	Zhang et al. ACS Nano 2012, 6, 5, 4349–4368
Fe2O3	12.3	24 h	EC50	>200	#VALUE!	BEAS-2B cells, MTS assay	Human cells	--	Zhang et al. ACS Nano 2012, 6, 5, 4349–4368
Fe3o4	-	48 h	IC50	1000	0.00431034	K562 cells	Human cells	-2.36549	Malekshah et al. ,2020, Drug Delivery, 27:1, 1201-1217
Fe3o4	6	24 H	EC50	>500	#VALUE!	SK HEP 1	Human cells	#VALUE!	Xie et al. International journal of Nanomedicine, 11, 2016, 3557—3570
Fe3o4	9	24 H	EC50	>500	#VALUE!	SK HEP 1	Human cells	#VALUE!	Xie et al. International journal of Nanomedicine, 11, 2016, 3557—3570
Fe3o4	14	24 H	EC50	>500	#VALUE!	SK HEP 1	Human cells	#VALUE!	Xie et al. International journal of Nanomedicine, 11, 2016, 3557—3570
Fe3o4	6	24 H	EC50	>500	#VALUE!	Hep 3B	Human cells	#VALUE!	Xie et al. International journal of Nanomedicine, 11, 2016, 3557—3570
Fe3o4	9	24 H	EC50	>500	#VALUE!	Hep 3B	Human cells	#VALUE!	Xie et al. International journal of Nanomedicine, 11, 2016, 3557—3570
Fe3o4	14	24 H	EC50	>500	#VALUE!	Hep 3B	Human cells	#VALUE!	Xie et al. International journal of Nanomedicine, 11, 2016, 3557—3570
Gd2O3	72.76	24 h	EC50	952.157	0.00263027	A549 cells	Human cells	-2.58	Cao et al. Green Chem., 2020,22, 3512-3521
Gd2O3	15-30	24 h	ec50	>1000	#VALUE!	A549	Human cells	#VALUE!	Horie et al. Metallomics, 2012, 4, 350–360
Gd2O3	15-30	24 h	ec50	>1000	#VALUE!	Hacat	Human cells	#VALUE!	Horie et al. Metallomics, 2012, 4, 350–360
HfO2	43.86	24 h	EC50	1236.57	0.00588844	A549 cells	Human cells	-2.23	Cao et al. Green Chem., 2020,22, 3512-3521
In2O3	29.8	24 h	LC50	332	0.00119424	Hacat cells	Human cells	-2.92291	Gajewicz et al. Nanotoxicology, 2015;9(3):313-25
In2O3	77.15	24 h	EC50	326.622	0.0011749	A549 cells	Human cells	-2.93	Cao et al. Green Chem., 2020,22, 3512-3521
La2O3	45.6	24 h	LC50	443	0.0013589	Hacat cells	Human cells	-2.86681	Gajewicz et al. Nanotoxicology, 2015;9(3):313-25
La2O3	75.81	24 h	EC50	450.005	0.00138038	A549 cells	Human cells	-2.86	Cao et al. Green Chem., 2020,22, 3512-3521
La2O3	15-30	24 h	ec50	>1000	#VALUE!	A549	Human cells	#VALUE!	Horie et al. Metallomics, 2012, 4, 350–360
La2O3	15-30	24 h	ec50	>1000	#VALUE!	Hacat	Human cells	#VALUE!	Horie et al. Metallomics, 2012, 4, 350–360
La2O3	103.6	48h	LD50	50.58	0.000155153	a549	Human cells	-3.80924	Lim et al.,Toxicol. Res.,(2015) Vol. 31, No. 2, pp. 181-189 Vol. 31, No. 2, pp. 181-189 (2015
MgO	20	24 h	ec50	1000	0.025	A549	Human cells	-1.60206	Horie et al. Metallomics, 2012, 4, 350–360
MgO	20	24 h	ec50	1000	0.025	Hacat	Human cells	-1.60206	Horie et al. Metallomics, 2012, 4, 350–360
MgO	23.8	24 h	ec50 (in SFM medium)	>100	#VALUE!	A549 cells	Human cells	#VALUE!	Areecheewakul, et al. NanoImpact 18 (2020) 100214
MgO	23.8	24 h	ec50 (in SCM medium)	>100	#VALUE!	A549 cells	Human cells	#VALUE!	Areecheewakul, et al. NanoImpact 18 (2020) 100214
MgO	23.8	24 h	ec50 (in SFM medium)	150	0.00375	A549 cells	Human cells	-2.42597	Areecheewakul, et al. NanoImpact 18 (2020) 100214
MgO	23.8	24 h	ec50 (in SCM medium)	150	0.00375	A549 cells	Human cells	-2.42597	Areecheewakul, et al. NanoImpact 18 (2020) 100214
MgO	-	24 h	IC50	˃100	#VALUE!	A549	Human cells	#VALUE!	Ivansk et al. Curr Top Med Chem., 2015;15(18):1914-29
MgO	-	24 h	IC50	˃100	#VALUE!	Caco2	Human cells	#VALUE!	Ivansk et al. Curr Top Med Chem., 2015;15(18):1914-29
Mn2O3	29.8	24 h	LC50	362	0.00229114	Hacat cells	Human cells	-2.63995	Gajewicz et al. Nanotoxicology, 2015;9(3):313-25
Mn2O3	36.87	24 h	EC50	22.3181	0.000141254	A549 cells	Human cells	-3.85	Cao et al. Green Chem., 2020,22, 3512-3521
Mn2O3	51.5	24 h	EC50	13.1826	8.3434e-05	BEAS-2B cells, ATP assay	Human cells	-4.07866	Zhang et al. ACS Nano 2012, 6, 5, 4349–4368
Mn2O3	51.5	24 h	EC50	11.2202	7.10138e-05	BEAS-2B cells, MTS assay	Human cells	-4.14866	Zhang et al. ACS Nano 2012, 6, 5, 4349–4368
Mn2O3	30-60	24 h	EC50	50	0.000316456	BEAS-2B	Human cells	-3.49969	Huang et al. Materials 2010, 3, 4842-4859;
Mn3O4	14.9	24 h	IC50	136.2	0.00059476	A549	Human cells	-3.22566	Ivansk et al. Curr Top Med Chem., 2015;15(18):1914-29
Mn3O4	14.9	24 h	IC50	66.7	0.000291266	Caco2	Human cells	-3.53571	Ivansk et al. Curr Top Med Chem., 2015;15(18):1914-29
Mn3o4	-	108	ec50	31.8	0.000138865	A549	Human cells	-3.85741	Titma et al. Cytotechnology. 2016;68(6):2363-2377
Mn3o4	-	60 h	ec50	39.2	0.000171179	A549	Human cells	-3.76655	Titma et al. Cytotechnology. 2016;68(6):2363-2377
Mn3o4	-	216	ec50	47.1	0.000205677	A549	Human cells	-3.68681	Titma et al. Cytotechnology. 2016;68(6):2363-2377
Mn3o4	-	36 h	ec50	90.6	0.000395633	A549	Human cells	-3.40271	Titma et al. Cytotechnology. 2016;68(6):2363-2377
Mn3o4	-	108	ec50	20.7	9.0393e-05	Caco2	Human cells	-4.04387	Titma et al. Cytotechnology. 2016;68(6):2363-2377
Mn3o4	-	216	ec50	28.9	0.000126201	Caco2	Human cells	-3.89894	Titma et al. Cytotechnology. 2016;68(6):2363-2377
Mn3o4	-	60 h	ec50	33.2	0.000144978	Caco2	Human cells	-3.8387	Titma et al. Cytotechnology. 2016;68(6):2363-2377
MoO3	100	24 h	ec50	1000	0.00694444	A549	Human cells	-2.15836	Horie et al. Metallomics, 2012, 4, 350–360
MoO3	100	24 h	ec50	1000	0.00694444	Hacat	Human cells	-2.15836	Horie et al. Metallomics, 2012, 4, 350–360
Ni	64-69	24 h	IC50	1032	0.0174915	a549	Human cells	-1.75717	Lanone et al. Particle and Fibre Toxicology 2009, 6:28
Ni	64-69	24 h	IC50	509.9	0.00864237	a549	Human cells	-2.06337	Lanone et al. Particle and Fibre Toxicology 2009, 6:29
Ni	64-69	24 h	IC50	79.46	0.00134678	THP-1	Human cells	-2.8707	Lanone et al. Particle and Fibre Toxicology 2009, 6:14
Ni	64-69	24 h	IC50	141	0.00238983	THP-1	Human cells	-2.62163	Lanone et al. Particle and Fibre Toxicology 2009, 6:29
Ni2O3	140.6	24 h	EC50	63.0957	0.000382398	BEAS-2B cells, ATP assay	Human cells	-3.41748	Zhang et al. ACS Nano 2012, 6, 5, 4349–4368
Ni2O3	140.6	24 h	EC50	331.131	0.00200686	BEAS-2B cells, MTS assay	Human cells	-2.69748	Zhang et al. ACS Nano 2012, 6, 5, 4349–4368
NiO	10.96	24 h	EC50	90.1698	0.00120226	A549 cells	Human cells	-2.92	Cao et al. Green Chem., 2020,22, 3512-3521
NiO	13.1	24 h	EC50	416869	5.55826	BEAS-2B cells, MTS assay	Human cells	0.744939	Zhang et al. ACS Nano 2012, 6, 5, 4349–4368
NiO	20	24 h	LC50	242	0.00322667	Hacat cells	Human cells	-2.49125	Gajewicz et al. Nanotoxicology, 2015;9(3):313-25
NiO	48.9	24 h	IC50	994.9	0.0132653	a549	Human cells	-1.87728	Lanone et al. Particle and Fibre Toxicology 2009, 6:14
NiO	48.9	24 h	IC50	23.31	0.0003108	THP-1	Human cells	-3.50752	Lanone et al. Particle and Fibre Toxicology 2009, 6:14
NiO	48.9	24 h	IC50	1613	0.0215067	THP-1	Human cells	-1.66743	Lanone et al. Particle and Fibre Toxicology 2009, 6:14
NiO	48.9	24 h	IC50	2.36	3.14667e-05	THP-1	Human cells	-4.50215	Lanone et al. Particle and Fibre Toxicology 2009, 6:29
NiO	10--20	24 h	EC50	25	0.000333333	BEAS-2B	Human cells	-3.47712	Huang et al. Materials 2010, 3, 4842-4859;
NiO	13.1	24 h	EC50	>200	#VALUE!	BEAS-2B cells, MTS assay	Human cells	#VALUE!	Zhang et al. ACS Nano 2012, 6, 5, 4349–4368
Sb2O3	20.8	24 h	IC50	79.9	0.00027363	A549	Human cells	-3.56284	Ivansk et al. Curr Top Med Chem., 2015;15(18):1914-29
Sb2O3	20.8	24 h	IC50	57.2	0.00019589	Caco2	Human cells	-3.70799	Ivansk et al. Curr Top Med Chem., 2015;15(18):1914-29
Sb2O3	107.91	24 h	EC50	422.068	0.00144544	A549 cells	Human cells	-2.84	Cao et al. Green Chem., 2020,22, 3512-3521
Sb2O3	-	216	ec50	22	7.53425e-05	A549	Human cells	-4.12296	Titma et al. Cytotechnology. 2016;68(6):2363-2377
Sb2O3	-	108	ec50	38.5	0.000131849	A549	Human cells	-3.87992	Titma et al. Cytotechnology. 2016;68(6):2363-2377
Sb2O3	-	60 h	ec50	59.1	0.000202397	A549	Human cells	-3.6938	Titma et al. Cytotechnology. 2016;68(6):2363-2377
Sb2O3	-	36 h	ec50	84.6	0.000289726	A549	Human cells	-3.53801	Titma et al. Cytotechnology. 2016;68(6):2363-2377
Sb2O3	-	60 h	ec50	38	0.000130137	Caco2	Human cells	-3.8856	Titma et al. Cytotechnology. 2016;68(6):2363-2377
Sb2O3	-	108	ec50	47.4	0.000162329	Caco2	Human cells	-3.7896	Titma et al. Cytotechnology. 2016;68(6):2363-2377
Sb2O3	-	216	ec50	48.2	0.000165068	Caco2	Human cells	-3.78234	Titma et al. Cytotechnology. 2016;68(6):2363-2377
Sb2O3	-	36 h	ec50	66.8	0.000228767	Caco2	Human cells	-3.64061	Titma et al. Cytotechnology. 2016;68(6):2363-2377
Sb2O3	-	24 h	ec50	10	3.42466e-05	Caco2	Human cells	-4.46538	Titma et al. Cytotechnology. 2016;68(6):2363-2377
Sb2O3	-	48 h	ec50	10	3.42466e-05	Caco2	Human cells	-4.46538	Titma et al. Cytotechnology. 2016;68(6):2363-2377
Sb2O3	-	72	ec50	10	3.42466e-05	Caco2	Human cells	-4.46538	Titma et al. Cytotechnology. 2016;68(6):2363-2377
Sb2O3	90--210	24 h	LC50	1429	0.00489384	Hacat cells	Human cells	-2.31035	Gajewicz et al. Nanotoxicology, 2015;9(3):313-25
SiO2	12	24 h	IC50	>100	#VALUE!	A549	Human cells	#VALUE!	Ivansk et al. Curr Top Med Chem., 2015;15(18):1914-29
SiO2	12	24 h	IC50	˃100	#VALUE!	Caco2	Human cells	#VALUE!	Ivansk et al. Curr Top Med Chem., 2015;15(18):1914-29
SiO2	13.5	24 h	EC50	200	0.00333333	BEAS-2B cells, ATP assay	Human cells	-2.47712	Zhang et al. ACS Nano 2012, 6, 5, 4349–4368
SiO2	13.5	24 h	EC50	2.75423e+07	459.038	BEAS-2B cells, MTS assay	Human cells	2.66185	Zhang et al. ACS Nano 2012, 6, 5, 4349–4368
SiO2	15	24 h	LC50	453	0.00755	Hacat cells	Human cells	-2.12205	Gajewicz et al. Nanotoxicology, 2015;9(3):313-25
SiO2	15.23	24 h	EC50	293.867	0.00489779	A549 cells	Human cells	-2.31	Cao et al. Green Chem., 2020,22, 3512-3521
SiO2	212	24 h	ec50	>100	#VALUE!	human mesenchymal stem cells	Human cells	#VALUE!	Bondarenko et al. Nanotoxicology, 2016; 10(9): 1229–1242
SiO2	212	24 h	ec50	>100	#VALUE!	human mesenchymal stem cells (MTT)	Human cells	#VALUE!	Bondarenko et al. Nanotoxicology, 2016; 10(9): 1229–1242
SnO2	21	24 h	ec50	1000	0.00662252	A549	Human cells	-2.17898	Horie et al. Metallomics, 2012, 4, 350–360
SnO2	21	24 h	ec50	1000	0.00662252	Hacat	Human cells	-2.17898	Horie et al. Metallomics, 2012, 4, 350–360
SnO2	26.85	24 h	EC50	5482.48	0.0363078	A549 cells	Human cells	-1.44	Cao et al. Green Chem., 2020,22, 3512-3521
SnO2	33	24 h	IC50	174	0.00115232	THP-1	Human cells	-2.93843	Lanone et al. Particle and Fibre Toxicology 2009, 6:14
SnO2	33	24 h	IC50	3.33	2.2053e-05	THP-1	Human cells	-4.65653	Lanone et al. Particle and Fibre Toxicology 2009, 6:14
SnO2	33	24 h	IC50	562.1	0.00372252	THP-1	Human cells	-2.42916	Lanone et al. Particle and Fibre Toxicology 2009, 6:29
SnO2	46.1	24 h	LC50	322	0.00213245	Hacat cells	Human cells	-2.67112	Gajewicz et al. Nanotoxicology, 2015;9(3):313-25
SnO2	62.4	24 h	EC50	>200	#VALUE!	BEAS-2B cells, ATP assay	Human cells	#VALUE!	Zhang et al. ACS Nano 2012, 6, 5, 4349–4368
SnO2	62.4	24 h	EC50	>200	#VALUE!	BEAS-2B cells, MTS assay	Human cells	#VALUE!	Zhang et al. ACS Nano 2012, 6, 5, 4349–4368
TiO2	5	24 h	ec50	>100	#VALUE!	human mesenchymal stem cells	Human cells	#VALUE!	Bondarenko et al. Nanotoxicology, 2016; 10(9): 1229–1242
TiO2	5	24 h	ec50	>100	#VALUE!	human mesenchymal stem cells (MTT)	Human cells	#VALUE!	Bondarenko et al. Nanotoxicology, 2016; 10(9): 1229–1242
TiO2	12.2	24 h	IC50	369.2	0.004615	THP-1	Human cells	-2.33583	Lanone et al. Particle and Fibre Toxicology 2009, 6:14
TiO2	12.2	24 h	IC50	432	0.0054	THP-1	Human cells	-2.26761	Lanone et al. Particle and Fibre Toxicology 2009, 6:14
TiO2	12.2	24 h	IC50	845.2	0.010565	THP-1	Human cells	-1.97613	Lanone et al. Particle and Fibre Toxicology 2009, 6:14
TiO2	12.2	24 h	IC50	95.97	0.00119962	THP-1	Human cells	-2.92095	Lanone et al. Particle and Fibre Toxicology 2009, 6:29
TiO2	12.2	24 h	IC50	1062	0.013275	THP-1	Human cells	-1.87697	Lanone et al. Particle and Fibre Toxicology 2009, 6:29
TiO2	12.2	24 h	IC50	220.5	0.00275625	THP-1	Human cells	-2.55968	Lanone et al. Particle and Fibre Toxicology 2009, 6:29
TiO2	12.6	24 h	EC50	>200	#VALUE!	BEAS-2B cells, ATP assay	Human cells	#VALUE!	Zhang et al. ACS Nano 2012, 6, 5, 4349–4368
TiO2	12.6	24 h	EC50	>200	#VALUE!	BEAS-2B cells, MTS assay	Human cells	#VALUE!	Zhang et al. ACS Nano 2012, 6, 5, 4349–4368
TiO2	14.2	24 h	IC50	˃100	#VALUE!	A549	Human cells	#VALUE!	Ivansk et al. Curr Top Med Chem., 2015;15(18):1914-29
TiO2	14.2	24 h	IC50	˃100	#VALUE!	Caco2	Human cells	#VALUE!	Ivansk et al. Curr Top Med Chem., 2015;15(18):1914-29
TiO2	21.2	24 h	EC50	129.745	0.00162181	A549 cells	Human cells	-2.79	Cao et al. Green Chem., 2020,22, 3512-3521
TiO2	39.9	24 h	EC50	4000	0.004	A549 CELLS	Human cells	-2.39794	Jeong et al. Front Pharmacol. 2018 22;9:15.
TiO2	39.9	24 h	EC50	4000	0.004	THP-1 CELLS	Human cells	-2.39794	Jeong et al. Front Pharmacol. 2018 22;9:15.
TiO2	42.3	24 h	LC50	1389	0.0173625	Hacat cells	Human cells	-1.76039	Gajewicz et al. Nanotoxicology, 2015;9(3):313-25
TiO2	113.4	24 h	ec50 (in SFM medium)	>150	#VALUE!	A549 cells	Human cells	#VALUE!	Areecheewakul, et al. NanoImpact 18 (2020) 100214
TiO2	113.4	24 h	ec50 (in SCM medium)	>150	#VALUE!	A549 cells	Human cells	#VALUE!	Areecheewakul, et al. NanoImpact 18 (2020) 100214
TiO2	113.4	24 h	ec50 (in SFM medium)	>150	#VALUE!	A549 cells	Human cells	#VALUE!	Areecheewakul, et al. NanoImpact 18 (2020) 100214
TiO2	113.4	24 h	ec50 (in SCM medium)	>150	#VALUE!	A549 cells	Human cells	#VALUE!	Areecheewakul, et al. NanoImpact 18 (2020) 100214
TiO2	-	24 h	LD 50	1000	0.0125	A549	Human cells	-1.90309	Lozano et al 2011 J. Phys.: Conf. Ser. 304 012046
TiO2	-	48 h	LD 50	1000	0.0125	A549	Human cells	-1.90309	Lozano et al 2011 J. Phys.: Conf. Ser. 304 012046
TiO2	-	36 h	ec50	>200	#VALUE!	A549	Human cells	#VALUE!	Titma et al. Cytotechnology. 2016;68(6):2363-2377
TiO2	-	12 h	ec50	>200	#VALUE!	A549	Human cells	#VALUE!	Titma et al. Cytotechnology. 2016;68(6):2363-2377
TiO2	-	24 h	ec50	>200	#VALUE!	A549	Human cells	#VALUE!	Titma et al. Cytotechnology. 2016;68(6):2363-2377
TiO2	-	60 h	ec50	>200	#VALUE!	A549	Human cells	#VALUE!	Titma et al. Cytotechnology. 2016;68(6):2363-2377
TiO2	-	108	ec50	>200	#VALUE!	A549	Human cells	#VALUE!	Titma et al. Cytotechnology. 2016;68(6):2363-2377
TiO2	-	216	ec50	>200	#VALUE!	A549	Human cells	#VALUE!	Titma et al. Cytotechnology. 2016;68(6):2363-2377
TiO2	-	36 h	ec50	>200	#VALUE!	A549	Human cells	#VALUE!	Titma et al. Cytotechnology. 2016;68(6):2363-2377
TiO2	-	12 h	ec50	>200	#VALUE!	A549	Human cells	#VALUE!	Titma et al. Cytotechnology. 2016;68(6):2363-2377
TiO2	-	24 h	ec50	>200	#VALUE!	A549	Human cells	#VALUE!	Titma et al. Cytotechnology. 2016;68(6):2363-2377
TiO2	-	60 h	ec50	>200	#VALUE!	A549	Human cells	#VALUE!	Titma et al. Cytotechnology. 2016;68(6):2363-2377
TiO2	-	108	ec50	>200	#VALUE!	A549	Human cells	#VALUE!	Titma et al. Cytotechnology. 2016;68(6):2363-2377
TiO2	-	216	ec50	>200	#VALUE!	A549	Human cells	#VALUE!	Titma et al. Cytotechnology. 2016;68(6):2363-2377
TiO2	-	36 h	ec50	>200	#VALUE!	Caco2	Human cells	#VALUE!	Titma et al. Cytotechnology. 2016;68(6):2363-2377
TiO2	-	12 h	ec50	>200	#VALUE!	Caco2	Human cells	#VALUE!	Titma et al. Cytotechnology. 2016;68(6):2363-2377
TiO2	-	24 h	ec50	>200	#VALUE!	Caco2	Human cells	#VALUE!	Titma et al. Cytotechnology. 2016;68(6):2363-2377
TiO2	-	60 h	ec50	>200	#VALUE!	Caco2	Human cells	#VALUE!	Titma et al. Cytotechnology. 2016;68(6):2363-2377
TiO2	-	108	ec50	>200	#VALUE!	Caco2	Human cells	#VALUE!	Titma et al. Cytotechnology. 2016;68(6):2363-2377
TiO2	-	216	ec50	>200	#VALUE!	Caco2	Human cells	#VALUE!	Titma et al. Cytotechnology. 2016;68(6):2363-2377
TiO2	-	36 h	ec50	>200	#VALUE!	Caco2	Human cells	#VALUE!	Titma et al. Cytotechnology. 2016;68(6):2363-2377
TiO2	-	12 h	ec50	>200	#VALUE!	Caco2	Human cells	#VALUE!	Titma et al. Cytotechnology. 2016;68(6):2363-2377
TiO2	-	24 h	ec50	>200	#VALUE!	Caco2	Human cells	#VALUE!	Titma et al. Cytotechnology. 2016;68(6):2363-2377
TiO2	-	60 h	ec50	>200	#VALUE!	Caco2	Human cells	#VALUE!	Titma et al. Cytotechnology. 2016;68(6):2363-2377
TiO2	-	108	ec50	>200	#VALUE!	Caco2	Human cells	#VALUE!	Titma et al. Cytotechnology. 2016;68(6):2363-2377
TiO2	-	216	ec50	>200	#VALUE!	Caco2	Human cells	#VALUE!	Titma et al. Cytotechnology. 2016;68(6):2363-2377
TiO2	-	24 h	LD 50	1000	0.0125	HeLa cells	Human cells	-1.90309	Lozano et al 2011 J. Phys.: Conf. Ser. 304 012046
TiO2	-	48 h	LD 50	1000	0.0125	HeLa cells	Human cells	-1.90309	Lozano et al 2011 J. Phys.: Conf. Ser. 304 012046
TiO2	-	24 h	LD 50	1000	0.0125	NCl H460	Human cells	-1.90309	Lozano et al 2011 J. Phys.: Conf. Ser. 304 012046
TiO2	-	48 h	LD 50	1000	0.0125	NCl H460	Human cells	-1.90309	Lozano et al 2011 J. Phys.: Conf. Ser. 304 012046
TiO2	-	24 h	LD 50	1000	0.0125	SK- MES 1	Human cells	-1.90309	Lozano et al 2011 J. Phys.: Conf. Ser. 304 012046
TiO2	-	48 h	LD 50	1000	0.0125	SK- MES 1	Human cells	-1.90309	Lozano et al 2011 J. Phys.: Conf. Ser. 304 012046
TiO2	>25	24 h	IC50	>100	#VALUE!	A549	Human cells	#VALUE!	Seiffert et al., 2012,Chem. Res. Toxicol., 25, 140–152
TiO2	>25	24 h	IC50	>100	#VALUE!	A549	Human cells	#VALUE!	Seiffert et al., 2012,Chem. Res. Toxicol., 25, 140–152
TiO2	>25	24 h	IC50	>100	#VALUE!	A549	Human cells	#VALUE!	Seiffert et al., 2012,Chem. Res. Toxicol., 25, 140–152
TiO2	>25	24 h	IC50	>100	#VALUE!	A549	Human cells	#VALUE!	Seiffert et al., 2012,Chem. Res. Toxicol., 25, 140–152
TiO2	>25	24 h	IC50	>100	#VALUE!	A549	Human cells	#VALUE!	Seiffert et al., 2012,Chem. Res. Toxicol., 25, 140–152
TiO2	>25	24 h	IC50	>100	#VALUE!	A549	Human cells	#VALUE!	Seiffert et al., 2012,Chem. Res. Toxicol., 25, 140–152
TiO2	>25	24 h	IC50	>100	#VALUE!	A549	Human cells	#VALUE!	Seiffert et al., 2012,Chem. Res. Toxicol., 25, 140–152
TiO2	>25	24 h	IC50	>100	#VALUE!	A549	Human cells	#VALUE!	Seiffert et al., 2012,Chem. Res. Toxicol., 25, 140–152
TiO2	>25	24 h	IC50	>100	#VALUE!	A549	Human cells	#VALUE!	Seiffert et al., 2012,Chem. Res. Toxicol., 25, 140–152
TiO2	>25	24 h	IC50	>100	#VALUE!	A549	Human cells	#VALUE!	Seiffert et al., 2012,Chem. Res. Toxicol., 25, 140–152
TiO2	10--30	24 h	EC50	>100	#VALUE!	BEAS-2B	Human cells	#VALUE!	Huang et al. Materials 2010, 3, 4842-4859;
TiO2	30-50	24 h	ec50	1000	0.0125	A549	Human cells	-1.90309	Horie et al. Metallomics, 2012, 4, 350–360
TiO2	30-50	24 h	ec50	1000	0.0125	Hacat	Human cells	-1.90309	Horie et al. Metallomics, 2012, 4, 350–360
TiO2	5--15	24 h	ec50	1000	0.0125	A549	Human cells	-1.90309	Horie et al. Metallomics, 2012, 4, 350–360
TiO2	5--15	24 h	ec50	1000	0.0125	A549	Human cells	-1.90309	Horie et al. Metallomics, 2012, 4, 350–360
TiO2	5--15	24 h	ec50	1000	0.0125	Hacat	Human cells	-1.90309	Horie et al. Metallomics, 2012, 4, 350–360
TiO2	5--15	24 h	ec50	1000	0.0125	Hacat	Human cells	-1.90309	Horie et al. Metallomics, 2012, 4, 350–360
V2O3	-	24 h	LC50	855	0.0057	Hacat cells	Human cells	-2.24413	Gajewicz et al. Nanotoxicology, 2015;9(3):313-25
V2O3	-	48 h	eC50	20	0.000133333	a549	Human cells	-3.87506	Wörle-Knirsch et al., Environ. Sci. Technol. 2007, 41, 1, 331–336
WO3	30	24 h	ec50	1000	0.00431034	A549	Human cells	-2.36549	Horie et al. Metallomics, 2012, 4, 350–360
WO3	30	24 h	ec50	1000	0.00431034	Hacat	Human cells	-2.36549	Horie et al. Metallomics, 2012, 4, 350–360
WO3	40.08	24 h	EC50	1274.93	0.00549541	A549 cells	Human cells	-2.26	Cao et al. Green Chem., 2020,22, 3512-3521
WO3	30-70	24 h	LC50	634	0.00273276	Hacat cells	Human cells	-2.5634	Gajewicz et al. Nanotoxicology, 2015;9(3):313-25
Y2O3	33	24 h	ec50	1000	0.00442478	A549	Human cells	-2.35411	Horie et al. Metallomics, 2012, 4, 350–360
Y2O3	33	24 h	ec50	1000	0.00442478	Hacat	Human cells	-2.35411	Horie et al. Metallomics, 2012, 4, 350–360
Y2O3	38	24 h	LC50	1390	0.00615044	Hacat cells	Human cells	-2.21109	Gajewicz et al. Nanotoxicology, 2015;9(3):313-25
Y2O3	41.89	24 h	EC50	247.804	0.00109648	A549 cells	Human cells	-2.96	Cao et al. Green Chem., 2020,22, 3512-3521
Yb2O3	99.85	24 h	EC50	556.54	0.00141254	A549 cells	Human cells	-2.85	Cao et al. Green Chem., 2020,22, 3512-3521
ZnO	13.6	24 h	ec50	1.9	2.34568e-05	human mesenchymal stem cells	Human cells	-4.62973	Bondarenko et al. Nanotoxicology, 2016; 10(9): 1229–1242
ZnO	13.6	24 h	ec50	16.3	0.000201235	human mesenchymal stem cells (MTT)	Human cells	-3.6963	Bondarenko et al. Nanotoxicology, 2016; 10(9): 1229–1242
ZnO	16.5	24 h	EC50	81	0.001	A549 CELLS	Human cells	-3	Jeong et al. Front Pharmacol. 2018 22;9:15.
ZnO	16.5	24 h	EC50	97.2	0.0012	THP-1 CELLS	Human cells	-2.92082	Jeong et al. Front Pharmacol. 2018 22;9:15.
ZnO	19.7	24 h	IC50	24.9	0.000307407	A549	Human cells	-3.51229	Ivansk et al. Curr Top Med Chem., 2015;15(18):1914-29
ZnO	19.7	24 h	IC50	30.2	0.00037284	Caco2	Human cells	-3.42848	Ivansk et al. Curr Top Med Chem., 2015;15(18):1914-29
ZnO	20	24 h	EC50	12.5	0.000154321	BEAS-2B	Human cells	-3.81158	Huang et al. Materials 2010, 3, 4842-4859;
ZnO	21	24 h	ec50	100	0.00123457	A549	Human cells	-2.90849	Horie et al. Metallomics, 2012, 4, 350–360
ZnO	21	24 h	ec50	100	0.00123457	A549	Human cells	-2.90849	Horie et al. Metallomics, 2012, 4, 350–360
ZnO	21	24 h	ec50	100	0.00123457	Hacat	Human cells	-2.90849	Horie et al. Metallomics, 2012, 4, 350–360
ZnO	21	24 h	ec50	100	0.00123457	Hacat	Human cells	-2.90849	Horie et al. Metallomics, 2012, 4, 350–360
ZnO	22.6	24 h	EC50	3.63078	4.48245e-05	BEAS-2B cells, ATP assay	Human cells	-4.34849	Zhang et al. ACS Nano 2012, 6, 5, 4349–4368
ZnO	22.6	24 h	EC50	5.24807	6.4791e-05	BEAS-2B cells, MTS assay	Human cells	-4.18849	Zhang et al. ACS Nano 2012, 6, 5, 4349–4368
ZnO	39.05	24 h	EC50	131.367	0.00162181	A549 cells	Human cells	-2.79	Cao et al. Green Chem., 2020,22, 3512-3521
ZnO	45.7	24 h	ec50 (in SFM medium)	50	0.000617284	A549 cells	Human cells	-3.20952	Areecheewakul, et al. NanoImpact 18 (2020) 100214
ZnO	45.7	24 h	ec50 (in SCM medium)	50	0.000617284	A549 cells	Human cells	-3.20952	Areecheewakul, et al. NanoImpact 18 (2020) 100214
ZnO	45.7	24 h	ec50 (in SFM medium)	7.5	9.25926e-05	A549 cells	Human cells	-4.03342	Areecheewakul, et al. NanoImpact 18 (2020) 100214
ZnO	45.7	24 h	ec50 (in SCM medium)	75	0.000925926	A549 cells	Human cells	-3.03342	Areecheewakul, et al. NanoImpact 18 (2020) 100214
ZnO	53.6	24 h	IC50	34.31	0.00042358	a549	Human cells	-3.37306	Lanone et al. Particle and Fibre Toxicology 2009, 6:14
ZnO	53.6	24 h	IC50	66.17	0.000816914	a549	Human cells	-3.08782	Lanone et al. Particle and Fibre Toxicology 2009, 6:14
ZnO	53.6	24 h	IC50	1.66	2.04938e-05	THP-1	Human cells	-4.68838	Lanone et al. Particle and Fibre Toxicology 2009, 6:14
ZnO	53.6	24 h	IC50	4.05	5e-05	THP-1	Human cells	-4.30103	Lanone et al. Particle and Fibre Toxicology 2009, 6:14
ZnO	53.6	24 h	IC50	2.08	2.5679e-05	THP-1	Human cells	-4.59042	Lanone et al. Particle and Fibre Toxicology 2009, 6:29
ZnO	53.6	24 h	IC50	81.22	0.00100272	THP-1	Human cells	-2.99882	Lanone et al. Particle and Fibre Toxicology 2009, 6:29
ZnO	71	24 h	LC50	39	0.000481481	Hacat cells	Human cells	-3.31742	Gajewicz et al. Nanotoxicology, 2015;9(3):313-25
ZnO	100	24 h	IC50	21.47	0.000265062	HEK293	Human cells	-3.57665	Dua et al., 2011,Bull. Korean Chem. Soc. Vol. 32, No. 6 2051
ZnO	100	48 h	IC50	20	0.000246914	HEK293	Human cells	-3.60746	Dua et al., 2011,Bull. Korean Chem. Soc. Vol. 32, No. 6 2051
ZnO	-	24 h	LD 50	250	0.00308642	A549	Human cells	-2.51055	Lozano et al 2011 J. Phys.: Conf. Ser. 304 012046
ZnO	-	48 h	LD 50	75	0.000925926	A549	Human cells	-3.03342	Lozano et al 2011 J. Phys.: Conf. Ser. 304 012046
ZnO	-	216	ec50	41.1	0.000507407	A549	Human cells	-3.29464	Titma et al. Cytotechnology. 2016;68(6):2363-2377
ZnO	-	36 h	ec50	42.8	0.000528395	A549	Human cells	-3.27704	Titma et al. Cytotechnology. 2016;68(6):2363-2377
ZnO	-	60 h	ec50	46	0.000567901	A549	Human cells	-3.24573	Titma et al. Cytotechnology. 2016;68(6):2363-2377
ZnO	-	108	ec50	46.8	0.000577778	A549	Human cells	-3.23824	Titma et al. Cytotechnology. 2016;68(6):2363-2377
ZnO	-	12 h	ec50	117.6	0.00145185	A549	Human cells	-2.83808	Titma et al. Cytotechnology. 2016;68(6):2363-2377
ZnO	-	60 h	ec50	52.4	0.000646914	Caco2	Human cells	-3.18915	Titma et al. Cytotechnology. 2016;68(6):2363-2377
ZnO	-	216	ec50	61.2	0.000755556	Caco2	Human cells	-3.12173	Titma et al. Cytotechnology. 2016;68(6):2363-2377
ZnO	-	108	ec50	62.5	0.000771605	Caco2	Human cells	-3.11261	Titma et al. Cytotechnology. 2016;68(6):2363-2377
ZnO	-	36 h	ec50	65.9	0.00081358	Caco2	Human cells	-3.0896	Titma et al. Cytotechnology. 2016;68(6):2363-2377
ZnO	-	24 h	LD 50	125	0.00154321	HeLa cells	Human cells	-2.81158	Lozano et al 2011 J. Phys.: Conf. Ser. 304 012046
ZnO	-	48 h	LD 50	125	0.00154321	HeLa cells	Human cells	-2.81158	Lozano et al 2011 J. Phys.: Conf. Ser. 304 012046
ZnO	-	24 h	LD 50	250	0.00308642	NCl H460	Human cells	-2.51055	Lozano et al 2011 J. Phys.: Conf. Ser. 304 012046
ZnO	-	48 h	LD 50	150	0.00185185	NCl H460	Human cells	-2.73239	Lozano et al 2011 J. Phys.: Conf. Ser. 304 012046
ZnO	-	24 h	LD 50	200	0.00246914	SK- MES 1	Human cells	-2.60746	Lozano et al 2011 J. Phys.: Conf. Ser. 304 012046
ZnO	-	48 h	LD 50	100	0.00123457	SK- MES 1	Human cells	-2.90849	Lozano et al 2011 J. Phys.: Conf. Ser. 304 012046
ZnO	>50	24 h	IC50	60	0.000740741	A549	Human cells	-3.13033	Seiffert et al., 2012,Chem. Res. Toxicol., 25, 140–152
ZnO	>50	24 h	IC50	60	0.000740741	A549	Human cells	-3.13033	Seiffert et al., 2012,Chem. Res. Toxicol., 25, 140–152
ZnO	>50	24 h	IC50	60	0.000740741	A549	Human cells	-3.13033	Seiffert et al., 2012,Chem. Res. Toxicol., 25, 140–152
ZnO	>50	24 h	IC50	60	0.000740741	A549	Human cells	-3.13033	Seiffert et al., 2012,Chem. Res. Toxicol., 25, 140–152
ZnO	>50	24 h	IC50	60	0.000740741	A549	Human cells	-3.13033	Seiffert et al., 2012,Chem. Res. Toxicol., 25, 140–152
ZrO2	19.87	24 h	EC50	1202	0.00977237	A549 cells	Human cells	-2.01	Cao et al. Green Chem., 2020,22, 3512-3521
ZrO2	32	24 h	IC50	911.2	0.00740813	a549	Human cells	-2.13029	Lanone et al. Particle and Fibre Toxicology 2009, 6:14
ZrO2	32	24 h	IC50	82.88	0.000673821	a549	Human cells	-3.17146	Lanone et al. Particle and Fibre Toxicology 2009, 6:14
ZrO2	32	24 h	IC50	570.6	0.00463902	THP-1	Human cells	-2.33357	Lanone et al. Particle and Fibre Toxicology 2009, 6:14
ZrO2	40.1	24 h	EC50	>200	#VALUE!	BEAS-2B cells, ATP assay	Human cells	#VALUE!	Zhang et al. ACS Nano 2012, 6, 5, 4349–4368
ZrO2	40.1	24 h	EC50	>200	#VALUE!	BEAS-2B cells, MTS assay	Human cells	#VALUE!	Zhang et al. ACS Nano 2012, 6, 5, 4349–4368
ZrO2	46.7	24 h	LC50	1188	0.00965854	Hacat cells	Human cells	-2.01509	Gajewicz et al. Nanotoxicology, 2015;9(3):313-25
ZrO2	20-30	24 h	ec50	1000	0.00813008	A549	Human cells	-2.08991	Horie et al. Metallomics, 2012, 4, 350–360
ZrO2	20-30	24 h	ec50	1000	0.00813008	Hacat	Human cells	-2.08991	Horie et al. Metallomics, 2012, 4, 350–360

## Sheet: Mammalian cells
NP	Size	Exposure time	Endpoint	Value (mg/l	Value(mol/L)	Cell type	Cell group	Log(endpoint)	reference
Ag	20.4	-	ec50	9.8	9.07407e-05	rat macrophages	Mammalian cells	-4.0422	Bondarenko et al. Nanotoxicology, 2016; 10(9): 1229–1242
Al2o3	40-47	12 h	EC50	>200	#VALUE!	Neuro 2A cells	Mammalian cells	#VALUE!	Jeng et al. ron Sci Health A Tox Hazard Subst Environ Eng. 2006;41(12):2699-711
Al2O3	14.7	24 h	EC50	>200	#VALUE!	RAW 2647 cells, ATP assay	Mammalian cells	#VALUE!	Zhang et al. ACS Nano 2012, 6, 5, 4349–4368
Al2O3	14.7	24 h	EC50	>200	#VALUE!	RAW 2647 cells, MTS assay	Mammalian cells	#VALUE!	Zhang et al. ACS Nano 2012, 6, 5, 4349–4368
Co3O4	9.2	24 h	IC50	135.5	0.000562241	Balb/c	Mammalian cells	-3.25008	Ivansk et al. Curr Top Med Chem., 2015;15(18):1914-29
Co3O4	10	24 h	EC50	22.3872	9.2893e-05	RAW 2647 cells, ATP assay	Mammalian cells	-4.03202	Zhang et al. ACS Nano 2012, 6, 5, 4349–4368
Co3O4	10	24 h	EC50	389.045	0.0016143	RAW 2647 cells, MTS assay	Mammalian cells	-2.79202	Zhang et al. ACS Nano 2012, 6, 5, 4349–4368
CoO	71.8	24 h	EC50	47.863	0.000638173	RAW 2647 cells, ATP assay	Mammalian cells	-3.19506	Zhang et al. ACS Nano 2012, 6, 5, 4349–4368
CoO	71.8	24 h	EC50	63.0957	0.000841276	RAW 2647 cells, MTS assay	Mammalian cells	-3.07506	Zhang et al. ACS Nano 2012, 6, 5, 4349–4368
Cr2o3	-	12 h	EC50	50	0.00131579	Neuro 2A cells	Mammalian cells	-2.88081	Jeng et al. ron Sci Health A Tox Hazard Subst Environ Eng. 2006;41(12):2699-711
Cr2O3	193	24 h	EC50	11.749	7.72959e-05	RAW 2647 cells, ATP assay	Mammalian cells	-4.11184	Zhang et al. ACS Nano 2012, 6, 5, 4349–4368
Cr2O3	193	24 h	EC50	467.735	0.0030772	RAW 2647 cells, MTS assay	Mammalian cells	-2.51184	Zhang et al. ACS Nano 2012, 6, 5, 4349–4368
CuO	11.9	24 h	IC50	17.7	0.000222516	Balb/c	Mammalian cells	-3.65264	Ivansk et al. Curr Top Med Chem., 2015;15(18):1914-29
CuO	-	24 h	ec50	11	0.000138287	Balb/c 3T3	Mammalian cells	-3.85922	Titma et al. Cytotechnology. 2016;68(6):2363-2377
CuO	24.5	48 h	ec50	1	1.25715e-05	murine Fibroblasts (membrane integrity)	Mammalian cells	-4.90061	Bondarenko et al. Nanotoxicology, 2016; 10(9): 1229–1242
CuO	24.5	24 h	ec50	0.7	8.80005e-06	murine Fibroblasts BALB/c 3t3	Mammalian cells	-5.05551	Bondarenko et al. Nanotoxicology, 2016; 10(9): 1229–1242
CuO	12.8	24 h	EC50	14.4544	0.000181713	RAW 2647 cells, ATP assay	Mammalian cells	-3.74061	Zhang et al. ACS Nano 2012, 6, 5, 4349–4368
CuO	12.8	24 h	EC50	13.1826	0.000165725	RAW 2647 cells, MTS assay	Mammalian cells	-3.78061	Zhang et al. ACS Nano 2012, 6, 5, 4349–4368
Fe2O3	12.3	24 h	EC50	>200	#VALUE!	RAW 2647 cells, ATP assay	Mammalian cells	--	Zhang et al. ACS Nano 2012, 6, 5, 4349–4368
Fe2O3	12.3	24 h	EC50	>200	#VALUE!	RAW 2647 cells, MTS assay	Mammalian cells	--	Zhang et al. ACS Nano 2012, 6, 5, 4349–4368
MgO	-	24 h	IC50	˃100	#VALUE!	Balb/c	Mammalian cells	#VALUE!	Ivansk et al. Curr Top Med Chem., 2015;15(18):1914-29
Mn2O3	51.5	24 h	EC50	12.5893	7.96788e-05	RAW 2647 cells, ATP assay	Mammalian cells	-4.09866	Zhang et al. ACS Nano 2012, 6, 5, 4349–4368
Mn2O3	51.5	24 h	EC50	10.2329	6.47654e-05	RAW 2647 cells, MTS assay	Mammalian cells	-4.18866	Zhang et al. ACS Nano 2012, 6, 5, 4349–4368
Mn3O4	14.9	24 h	IC50	195	0.000851528	Balb/c	Mammalian cells	-3.0698	Ivansk et al. Curr Top Med Chem., 2015;15(18):1914-29
Mn3o4	-	24 h	ec50	49.9	0.000217904	Balb/c 3T3	Mammalian cells	-3.66173	Titma et al. Cytotechnology. 2016;68(6):2363-2377
Ni2O3	140.6	24 h	EC50	87.0964	0.000527857	RAW 2647 cells, ATP assay	Mammalian cells	-3.27748	Zhang et al. ACS Nano 2012, 6, 5, 4349–4368
Ni2O3	140.6	24 h	EC50	316.228	0.00191653	RAW 2647 cells, MTS assay	Mammalian cells	-2.71748	Zhang et al. ACS Nano 2012, 6, 5, 4349–4368
NiO	13.1	24 h	EC50	151.356	0.00201808	RAW 2647 cells, MTS assay	Mammalian cells	-2.69506	Zhang et al. ACS Nano 2012, 6, 5, 4349–4368
NiO	13.1	24 h	EC50	>200	#VALUE!	RAW 2647 cells, MTS assay	Mammalian cells	#VALUE!	Zhang et al. ACS Nano 2012, 6, 5, 4349–4368
Sb2O3	20.8	24 h	IC50	39.1	0.000133904	Balb/c	Mammalian cells	-3.87321	Ivansk et al. Curr Top Med Chem., 2015;15(18):1914-29
Sb2O3	-	24 h	ec50	15.3	5.23973e-05	Balb/c 3T3	Mammalian cells	-4.28069	Titma et al. Cytotechnology. 2016;68(6):2363-2377
SiO2	12	24 h	IC50	˃100	#VALUE!	Balb/c	Mammalian cells	#VALUE!	Ivansk et al. Curr Top Med Chem., 2015;15(18):1914-29
SiO2	212	48 h	ec50	>100	#VALUE!	murine Fibroblasts (membrane integrity)	Mammalian cells	#VALUE!	Bondarenko et al. Nanotoxicology, 2016; 10(9): 1229–1242
SiO2	212	24 h	ec50	>100	#VALUE!	murine Fibroblasts BALB/c 3t3	Mammalian cells	#VALUE!	Bondarenko et al. Nanotoxicology, 2016; 10(9): 1229–1242
SiO2	212	-	ec50	>100	#VALUE!	rat macrophages	Mammalian cells	#VALUE!	Bondarenko et al. Nanotoxicology, 2016; 10(9): 1229–1242
SiO2	13.5	24 h	EC50	200	0.00333333	RAW 2647 cells, ATP assay	Mammalian cells	-2.47712	Zhang et al. ACS Nano 2012, 6, 5, 4349–4368
SiO2	13.5	24 h	EC50	200	0.00333333	RAW 2647 cells, MTS assay	Mammalian cells	-2.47712	Zhang et al. ACS Nano 2012, 6, 5, 4349–4368
SnO2	62.4	24 h	EC50	100000	0.662252	RAW 2647 cells, ATP assay	Mammalian cells	-0.178977	Zhang et al. ACS Nano 2012, 6, 5, 4349–4368
SnO2	62.4	24 h	EC50	>200	#VALUE!	RAW 2647 cells, MTS assay	Mammalian cells	#VALUE!	Zhang et al. ACS Nano 2012, 6, 5, 4349–4368
TiO2	14.2	24 h	IC50	˃100	#VALUE!	Balb/c	Mammalian cells	#VALUE!	Ivansk et al. Curr Top Med Chem., 2015;15(18):1914-29
TiO2	-	24 h	ec50	>200	#VALUE!	Balb/c 3T3	Mammalian cells	#VALUE!	Titma et al. Cytotechnology. 2016;68(6):2363-2377
TiO2	-	24 h	ec50	>100	#VALUE!	Balb/c 3T3	Mammalian cells	#VALUE!	Titma et al. Cytotechnology. 2016;68(6):2363-2377
TiO2	5	48 h	ec50	>100	#VALUE!	murine Fibroblasts (membrane integrity)	Mammalian cells	#VALUE!	Bondarenko et al. Nanotoxicology, 2016; 10(9): 1229–1242
TiO2	5	24 h	ec50	>100	#VALUE!	murine Fibroblasts BALB/c 3t3	Mammalian cells	#VALUE!	Bondarenko et al. Nanotoxicology, 2016; 10(9): 1229–1242
TiO2	<40	12 h	EC50	>200	#VALUE!	Neuro 2A cells	Mammalian cells	#VALUE!	Jeng et al. ron Sci Health A Tox Hazard Subst Environ Eng. 2006;41(12):2699-711
TiO2	<40	12 h	EC50	>200	#VALUE!	Neuro 2A cells	Mammalian cells	#VALUE!	Jeng et al. ron Sci Health A Tox Hazard Subst Environ Eng. 2006;41(12):2699-711
TiO2	5	-	ec50	>100	#VALUE!	rat macrophages	Mammalian cells	#VALUE!	Bondarenko et al. Nanotoxicology, 2016; 10(9): 1229–1242
TiO2	12.6	24 h	EC50	>200	#VALUE!	RAW 2647 cells, ATP assay	Mammalian cells	#VALUE!	Zhang et al. ACS Nano 2012, 6, 5, 4349–4368
TiO2	12.6	24 h	EC50	>200	#VALUE!	RAW 2647 cells, MTS assay	Mammalian cells	#VALUE!	Zhang et al. ACS Nano 2012, 6, 5, 4349–4368
ZnO	19.7	24 h	IC50	12.1	0.000149383	Balb/c	Mammalian cells	-3.8257	Ivansk et al. Curr Top Med Chem., 2015;15(18):1914-29
ZnO	-	24 h	ec50	11.2	0.000138272	Balb/c 3T3	Mammalian cells	-3.85927	Titma et al. Cytotechnology. 2016;68(6):2363-2377
ZnO	13.6	48 h	ec50	6.9	8.51852e-05	murine Fibroblasts (membrane integrity)	Mammalian cells	-4.06964	Bondarenko et al. Nanotoxicology, 2016; 10(9): 1229–1242
ZnO	13.6	24 h	ec50	9.1	0.000112346	murine Fibroblasts BALB/c 3t3	Mammalian cells	-3.94944	Bondarenko et al. Nanotoxicology, 2016; 10(9): 1229–1242
ZnO	50-70	12 h	EC50	50	0.00246914	Neuro 2A cells	Mammalian cells	-2.60746	Jeng et al. ron Sci Health A Tox Hazard Subst Environ Eng. 2006;41(12):2699-711
ZnO	22.6	24 h	EC50	8.12831	0.000100349	RAW 2647 cells, ATP assay	Mammalian cells	-3.99849	Zhang et al. ACS Nano 2012, 6, 5, 4349–4368
ZnO	22.6	24 h	EC50	17.378	0.000214543	RAW 2647 cells, MTS assay	Mammalian cells	-3.66849	Zhang et al. ACS Nano 2012, 6, 5, 4349–4368
ZrO2	40.1	24 h	EC50	>200	#VALUE!	RAW 2647 cells, ATP assay	Mammalian cells	#VALUE!	Zhang et al. ACS Nano 2012, 6, 5, 4349–4368
ZrO2	40.1	24 h	EC50	>200	#VALUE!	RAW 2647 cells, MTS assay	Mammalian cells	#VALUE!	Zhang et al. ACS Nano 2012, 6, 5, 4349–4368

## Sheet: Plants
NP	Size	Exposure time	Endpoint	Value (mg/l	Value(mol/L)	Cell type	Cell group	Log(endpoint)	reference
Ag2O	-	6 days	EC50	109.98	0.000474052	Vignia radiata	Plants	-3.32417	Singh et al. Bull Environ Contam Toxicol (2015) 95:379–384
Ag2O	-	6 days	EC50	122	0.000525862	Vignia radiata	Plants	-3.27913	Singh et al. Bull Environ Contam Toxicol (2015) 95:379–384
Ag2O	-	6 days	EC50	144	0.00062069	Vignia radiata	Plants	-3.20713	Singh et al. Bull Environ Contam Toxicol (2015) 95:379–384
Al	18	2 h	IC50	2000	0.0740741	Brassica napus	Plant	-1.13033	Lin et al. Environm. Pollut. 2007 150 (2) 243-250
Al	18	2 h	IC50	2000	0.0740741	Lolium perenne	Plants	-1.13033	Lin et al. Environm. Pollut. 2007 150 (2) 243-250
Al	18	2 h	IC50	2000	0.0740741	Raphanus sativus	Plants	-1.13033	Lin et al. Environm. Pollut. 2007 150 (2) 243-250
Al2O3	60	2 h	IC50	2000	0.0196078	Brassica napus	Plant	-1.70757	Lin et al. Environm. Pollut. 2007 150 (2) 243-250
Al2O3	40-50	4 days	EC50	1000	0.00980392	Lactuca sativa L.	Plants	-2.0086	Kong et al. Nanomaterials 2021, 11, 1653
Al2O3	40-50	4 days	EC50	1000	0.00980392	Lactuca sativa L.	Plants	-2.0086	Kong et al. Nanomaterials 2021, 11, 1653
Al2O3	60	2 h	IC50	2000	0.0196078	Lolium perenne	Plants	-1.70757	Lin et al. Environm. Pollut. 2007 150 (2) 243-250
Al2O3	40-50	4 days	EC50	1000	0.00980392	Raphanus sativus	Plants	-2.0086	Kong et al. Nanomaterials 2021, 11, 1653
Al2O3	60	2 h	IC50	2000	0.0196078	Raphanus sativus	Plants	-1.70757	Lin et al. Environm. Pollut. 2007 150 (2) 243-250
CeO2	7.2	2 h	IC50	1000	0.00581395	Brassica napus	Plant	-2.23553	Ma et al. Chemosphere 2010; 78 (3) 273-279
CeO2	7.2	2 h	IC50	1000	0.00581395	Cucumis sativus	Plant	-2.23553	Ma et al. Chemosphere 2010; 78 (3) 273-279
CeO2	7.2	2 h	IC50	1000	0.00581395	Raphanus sativus	Plants	-2.23553	Ma et al. Chemosphere 2010; 78 (3) 273-279
Co3O4	10--30	3 days	EC50	5000	0.0207469	Cucumis sativus	Plant	-1.68305	Wu et al. J Pet Environ Biotechnol, 2012, 3:126
Co3O4	10--30	3 days	EC50	5000	0.0207469	Lactuca sativa	Plants	-1.68305	Wu et al. J Pet Environ Biotechnol, 2012, 3:126
Co3O4	10--30	3 days	EC50	5000	0.0207469	Raphanus sativus	Plants	-1.68305	Wu et al. J Pet Environ Biotechnol, 2012, 3:126
CuO	30-50	3 days	EC50	175.4	0.00220504	Cucumis sativus	Plant	-2.65658	Wu et al. J Pet Environ Biotechnol, 2012, 3:126
CuO	30-50	3 days	EC50	12.9	0.000162172	Lactuca sativa	Plants	-3.79002	Wu et al. J Pet Environ Biotechnol, 2012, 3:126
CuO	30-50	3 days	EC50	0.46	5.78289e-06	Lactuca sativa L.	Plants	-5.23786	Ko et al. Appl Microbiol Biotechnol (2014) 98:3295–3303
CuO	30-50	4 days	EC50	0.25	3.125e-06	Lactuca sativa L.	Plants	-5.50515	Kong et al. Nanomaterials 2021, 11, 1653
CuO	30-50	4 days	EC50	1.28	1.6e-05	Lactuca sativa L.	Plants	-4.79588	Kong et al. Nanomaterials 2021, 11, 1653
CuO	30-50	4 days	EC50	0.35	4.375e-06	Raphanus sativus	Plants	-5.35902	Kong et al. Nanomaterials 2021, 11, 1653
CuO	30-50	3 days	EC50	297	0.00373374	Raphanus sativus	Plants	-2.42786	Wu et al. J Pet Environ Biotechnol, 2012, 3:126
CuO	30-50	3 days	EC50	26.84	0.000337419	Raphanus sativus L	Plants	-3.47183	Ko et al. Appl Microbiol Biotechnol (2014) 98:3295–3303
Fe2O3	20-40	3 days	EC50	1682	0.0105125	Cucumis sativus	Plant	-1.97829	Wu et al. J Pet Environ Biotechnol, 2012, 3:126
Fe2O3	20-40	3 days	EC50	5000	0.03125	Lactuca sativa	Plants	-1.50515	Wu et al. J Pet Environ Biotechnol, 2012, 3:126
Fe2O3	20-40	3 days	EC50	1000	0.00625	Lactuca sativa L.	Plants	-2.20412	Ko et al. Appl Microbiol Biotechnol (2014) 98:3295–3303
Fe2O3	20-40	3 days	EC50	5000	0.03125	Raphanus sativus	Plants	-1.50515	Wu et al. J Pet Environ Biotechnol, 2012, 3:126
Fe2O3	20-40	3 days	EC50	1000	0.00625	Raphanus sativus L	Plants	-2.20412	Ko et al. Appl Microbiol Biotechnol (2014) 98:3295–3303
Gd2O3	23.4	2 h	IC50	20	5.52486e-05	Brassica napus	Plant	-4.25768	Ma et al. Chemosphere 2010; 78 (3) 273-279
La2O3	21.8	2 h	IC51	40	0.000122699	Brassica napus	Plant	-3.91116	Ma et al. Chemosphere 2010; 78 (3) 273-279
La2O3	22	5 days	IC50	149	0.000457055	Cucumis sativus	Plant	-3.34003	Ma et al. Nanotoxicology 2011; 5(4) 743-753
NiO	30	3 days	EC50	228	0.00304	Cucumis sativus	Plant	-2.51713	Wu et al. J Pet Environ Biotechnol, 2012, 3:126
NiO	30	3 days	EC50	27.9	0.000372	Lactuca sativa	Plants	-3.42946	Wu et al. J Pet Environ Biotechnol, 2012, 3:126
NiO	30	3 days	EC50	17.17	0.000228933	Lactuca sativa L.	Plants	-3.64029	Ko et al. Appl Microbiol Biotechnol (2014) 98:3295–3303
NiO	8--20	4 days	EC50	0.57	7.6e-06	Lactuca sativa L.	Plants	-5.11919	Kong et al. Nanomaterials 2021, 11, 1653
NiO	8--20	4 days	EC50	5.57	7.42667e-05	Lactuca sativa L.	Plants	-4.12921	Kong et al. Nanomaterials 2021, 11, 1653
NiO	8--20	4 days	EC50	2.85	3.8e-05	Raphanus sativus	Plants	-4.42022	Kong et al. Nanomaterials 2021, 11, 1653
NiO	30	3 days	EC50	400	0.00533333	Raphanus sativus	Plants	-2.273	Wu et al. J Pet Environ Biotechnol, 2012, 3:126
NiO	30	3 days	EC50	114.21	0.0015228	Raphanus sativus L	Plants	-2.81736	Ko et al. Appl Microbiol Biotechnol (2014) 98:3295–3303
TiO2	30-50	3 days	EC50	5000	0.0625	Cucumis sativus	Plant	-1.20412	Wu et al. J Pet Environ Biotechnol, 2012, 3:126
TiO2	30-50	3 days	EC50	5000	0.0625	Lactuca sativa	Plants	-1.20412	Wu et al. J Pet Environ Biotechnol, 2012, 3:126
TiO2	<25	3 days	EC50	1000	0.0125	Lactuca sativa L.	Plants	-1.90309	Ko et al. Appl Microbiol Biotechnol (2014) 98:3295–3303
TiO2	<25	4 days	EC50	1000	0.0125	Lactuca sativa L.	Plants	-1.90309	Kong et al. Nanomaterials 2021, 11, 1653
TiO2	<25	4 days	EC50	1000	0.0125	Lactuca sativa L.	Plants	-1.90309	Kong et al. Nanomaterials 2021, 11, 1653
TiO2	<25	4 days	EC50	1000	0.0125	Raphanus sativus	Plants	-1.90309	Kong et al. Nanomaterials 2021, 11, 1653
TiO2	30-50	3 days	EC50	5000	0.0625	Raphanus sativus	Plants	-1.20412	Wu et al. J Pet Environ Biotechnol, 2012, 3:126
TiO2	<25	3 days	EC50	1000	0.0125	Raphanus sativus L	Plants	-1.90309	Ko et al. Appl Microbiol Biotechnol (2014) 98:3295–3303
Yb2O3	11.7	2 h	IC50	70	0.000177665	Brassica napus	Plant	-3.7504	Ma et al. Chemosphere 2010; 78 (3) 273-279
Yb2O3	12	5 days	EC50	182	0.000461929	Cucumis sativus	Plants	-3.33542	Zhang et al., Environ. Sci. Technol. 2012, 46, 3, 1834–1841
Zn	35	2 h	IC50	20	0.000307692	Brassica napus	Plant	-3.51188	Lin et al. Environm. Pollut. 2007 150 (2) 243-250
Zn	35	2 h	IC50	20	0.000307692	Lolium perenne	Plants	-3.51188	Lin et al. Environm. Pollut. 2007 150 (2) 243-250
Zn	35	2 h	IC50	50	0.000769231	Raphanus sativus	Plants	-3.11394	Lin et al. Environm. Pollut. 2007 150 (2) 243-250
ZnO	20	2 h	IC50	20	0.000246914	Brassica napus	Plant	-3.60746	Lin et al. Environm. Pollut. 2007 150 (2) 243-250
ZnO	-	3 days	EC50	10.84	0.000133827	Lactuca sativa L.	Plants	-3.87346	Ko et al. Appl Microbiol Biotechnol (2014) 98:3295–3303
ZnO	40-100	4 days	EC50	0.5	6.17284e-06	Lactuca sativa L.	Plants	-5.20952	Kong et al. Nanomaterials 2021, 11, 1653
ZnO	40-100	4 days	EC50	1.31	1.61728e-05	Lactuca sativa L.	Plants	-4.79121	Kong et al. Nanomaterials 2021, 11, 1653
ZnO	20	2 h	IC50	20	0.000246914	Lolium perenne	Plants	-3.60746	Lin et al. Environm. Pollut. 2007 150 (2) 243-250
ZnO	40-100	4 days	EC50	1.23	1.51852e-05	Raphanus sativus	Plants	-4.81858	Kong et al. Nanomaterials 2021, 11, 1653
ZnO	20	2 h	IC50	50	0.000617284	Raphanus sativus	Plants	-3.20952	Lin et al. Environm. Pollut. 2007 150 (2) 243-250
ZnO	-	3 days	EC50	46.54	0.000574568	Raphanus sativus L	Plants	-3.24066	Ko et al. Appl Microbiol Biotechnol (2014) 98:3295–3303
