# Supplementary material for: Metal and metal oxide nanoparticle toxicity: moving towards a more holistic structure–activity approach
Source: Royal Society of Chemistry journal article supplement (doi:10.1039/d2en00897a), 2023-01-01
Supplement: d2en00897a3.xlsx [file d2en00897a3.xlsx]

## Sheet: A549 
A549 Cells- Traning data
NP	Molar weight (g/mol)	Size	Exposure time	Assay	Endpoint	Value (mg/l	Value(mol/L)	Cell type	Cell group	Log(endpoint)	reference
'Ag'	108	312	'24 h'	'MTT assay'	'IC50'	42.67	0.000395093	'a549'	'Human cells'	-3.4033	'Lanone et al. Particle and Fibre Toxicology 2009, 6:14'
'Ag'	108	312	'24 h'	'Neutral Red assay.'	'IC50'	380.9	0.00352685	'a549'	'Human cells'	-2.45261	'Lanone et al. Particle and Fibre Toxicology 2009, 6:25'
'Ag'	108	5	'24 h'	'MTT'	'EC50'	1	9.25926e-06	'A549'	'Human cells'	-5.03342	'Liu et al. Nanotoxicology, 2010; 4(3): 319–330'
'Ag'	108	20	'24 h'	'MTT'	'EC50'	9.96	9.22222e-05	'A549'	'Human cells'	-4.03516	'Liu et al. Nanotoxicology, 2010; 4(3): 319–330'
'Ag'	108	50	'24 h'	'MTT'	'EC50'	13.3	0.000123148	'A549'	'Human cells'	-3.90957	'Liu et al. Nanotoxicology, 2010; 4(3): 319–330'
'Al2O3'	102	31	'24 h'	'MTT assay'	'ec50'	1000	0.00980392	'A549'	'Human cells'	-2.0086	'Horie et al. Metallomics, 2012, 4, 350–360'
'Al2O3'	102	28.15	'24 h'	'Cytotoxicity (PI staining)'	'ec50 (in SFM medium)'	NaN	NaN	'A549 cells'	'Human cells'	NaN	'Areecheewakul, et al. NanoImpact 18 (2020) 100214'
'Al2O3'	102	28.15	'24 h'	'Cytotoxicity (PI staining)'	'ec50 (in SCM medium)'	NaN	NaN	'A549 cells'	'Human cells'	NaN	'Areecheewakul, et al. NanoImpact 18 (2020) 100214'
'CeO2'	172	14	'24 h'	'MTT assay'	'ec50'	1000	0.00581395	'A549'	'Human cells'	-2.23553	'Horie et al. Metallomics, 2012, 4, 350–360'
'CeO2'	172	NaN	'48 h'	'Cellular proliferation colorimetric assay'	'LD 50'	1000	0.00581395	'A549'	'Human cells'	-2.23553	'Lozano et al 2011 J. Phys.: Conf. Ser. 304 012046'
'CeO2'	172	15.38	'24 h'	'CCK-8 cytotoxicity assay'	'EC50'	1885.94	0.0109648	'A549 cells'	'Human cells'	-1.96	'Cao et al. Green Chem., 2020,22, 3512-3521'
'Co'	59	20	'24 h'	'MTT assay'	'IC50'	1142	0.0193559	'a549'	'Human cells'	-1.71319	'Lanone et al. Particle and Fibre Toxicology 2009, 6:14'
'Co'	59	20	'24 h'	'MTT assay'	'IC50'	3039	0.0515085	'a549'	'Human cells'	-1.28812	'Lanone et al. Particle and Fibre Toxicology 2009, 6:14'
'Co'	59	20	'24 h'	'Neutral Red assay.'	'IC50'	241.6	0.00409492	'a549'	'Human cells'	-2.38776	'Lanone et al. Particle and Fibre Toxicology 2009, 6:27'
'Co3O4'	241	9.2	'24 h'	'NRU assay'	'IC50'	130.9	0.000543154	'A549'	'Human cells'	-3.26508	'Ivansk et al. Curr Top Med Chem., 2015;15(18):1914-29'
'Co3O4'	241	NaN	'12 h'	'resazurin fluorescence assay'	'ec50'	105.4	0.000437344	'A549'	'Human cells'	-3.35918	'Titma et al. Cytotechnology. 2016;68(6):2363-2377'
'Co3O4'	241	NaN	'108'	'resazurin fluorescence assay'	'ec50'	107.3	0.000445228	'A549'	'Human cells'	-3.35142	'Titma et al. Cytotechnology. 2016;68(6):2363-2377'
'Co3O4'	241	NaN	'36 h'	'resazurin fluorescence assay'	'ec50'	108.1	0.000448548	'A549'	'Human cells'	-3.34819	'Titma et al. Cytotechnology. 2016;68(6):2363-2377'
'Co3O4'	241	NaN	'60 h'	'resazurin fluorescence assay'	'ec50'	109.8	0.000455602	'A549'	'Human cells'	-3.34141	'Titma et al. Cytotechnology. 2016;68(6):2363-2377'
'Co3O4'	241	22.36	'24 h'	'CCK-8 cytotoxicity assay'	'EC50'	264.251	0.00109648	'A549 cells'	'Human cells'	-2.96	'Cao et al. Green Chem., 2020,22, 3512-3521'
'CoO'	75	75	'24 h'	'MTS assay'	'EC50'	157.5	0.0021	'A549 CELLS'	'Human cells'	-2.67778	'Jeong et al. Front Pharmacol. 2018 22;9:15.'
'Cr2O3'	152	61.38	'24 h'	'CCK-8 cytotoxicity assay'	'EC50'	115.304	0.000758578	'A549 cells'	'Human cells'	-3.12	'Cao et al. Green Chem., 2020,22, 3512-3521'
'Cu'	64	22.9	'24 h'	'MTT assay'	'IC50'	13.49	0.000210781	'a549'	'Human cells'	-3.67617	'Lanone et al. Particle and Fibre Toxicology 2009, 6:14'
'Cu'	64	22.9	'24 h'	'MTT assay'	'IC50'	17.04	0.00026625	'a549'	'Human cells'	-3.57471	'Lanone et al. Particle and Fibre Toxicology 2009, 6:14'
'Cu'	64	90	'24 h'	'MTT assay'	'IC50'	48.13	0.000752031	'a549'	'Human cells'	-3.12376	'Lanone et al. Particle and Fibre Toxicology 2009, 6:14'
'Cu'	64	90	'24 h'	'Neutral Red assay.'	'IC50'	74.95	0.00117109	'a549'	'Human cells'	-2.93141	'Lanone et al. Particle and Fibre Toxicology 2009, 6:15'
'Cu'	64	90	'24 h'	'Neutral Red assay.'	'IC50'	31.27	0.000488594	'a549'	'Human cells'	-3.31105	'Lanone et al. Particle and Fibre Toxicology 2009, 6:16'
'Cu'	64	22.9	'24 h'	'Neutral Red assay.'	'IC50'	70.79	0.00110609	'a549'	'Human cells'	-2.95621	'Lanone et al. Particle and Fibre Toxicology 2009, 6:18'
'Cu'	64	22.9	'24 h'	'Neutral Red assay.'	'IC50'	1698	0.0265312	'a549'	'Human cells'	-1.57624	'Lanone et al. Particle and Fibre Toxicology 2009, 6:17'
'Cu2O'	143	NaN	'24 h'	'MTT assay'	'IC50'	45	0.000314685	'a549'	'Human cells'	-3.50212	'Lanone et al. Particle and Fibre Toxicology 2009, 6:14'
'Cu2O'	143	NaN	'24 h'	'MTT assay'	'IC50'	52.52	0.000367273	'a549'	'Human cells'	-3.43501	'Lanone et al. Particle and Fibre Toxicology 2009, 6:14'
'Cu2O'	143	NaN	'24 h'	'Neutral Red assay.'	'IC50'	39.96	0.000279441	'a549'	'Human cells'	-3.55371	'Lanone et al. Particle and Fibre Toxicology 2009, 6:19'
'CuO'	79.545	11.9	'24 h'	'NRU assay'	'IC50'	18.9	0.000237601	'A549'	'Human cells'	-3.62415	'Ivansk et al. Curr Top Med Chem., 2015;15(18):1914-29'
'CuO'	79.545	42	'18 h'	'Cytotoxicity'	'EC50'	20	0.00025143	'A549'	'Human cells'	-3.59958	'Karlsson et al. Chem. Res. Toxicol. 2008, Vol. 21, No. 9'
'CuO'	79.545	30	'24 h'	'MTT assay'	'IC50'	10.07	0.000126595	'a549'	'Human cells'	-3.89758	'Lanone et al. Particle and Fibre Toxicology 2009, 6:14'
'CuO'	79.545	30	'24 h'	'MTT assay'	'IC50'	10.82	0.000136024	'a549'	'Human cells'	-3.86639	'Lanone et al. Particle and Fibre Toxicology 2009, 6:14'
'CuO'	79.545	45.4	'24 h'	'MTT assay'	'IC50'	47.41	0.000596015	'a549'	'Human cells'	-3.22474	'Lanone et al. Particle and Fibre Toxicology 2009, 6:14'
'CuO'	79.545	45.4	'24 h'	'Neutral Red assay.'	'IC50'	832.7	0.0104683	'a549'	'Human cells'	-1.98012	'Lanone et al. Particle and Fibre Toxicology 2009, 6:21'
'CuO'	79.545	45.4	'24 h'	'Neutral Red assay.'	'IC50'	102.5	0.00128858	'a549'	'Human cells'	-2.88989	'Lanone et al. Particle and Fibre Toxicology 2009, 6:22'
'CuO'	79.545	30	'24 h'	'Neutral Red assay.'	'IC50'	11.44	0.000143818	'a549'	'Human cells'	-3.84219	'Lanone et al. Particle and Fibre Toxicology 2009, 6:23'
'CuO'	79.545	30	'24 h'	'Neutral Red assay.'	'IC50'	20.84	0.00026199	'a549'	'Human cells'	-3.58172	'Lanone et al. Particle and Fibre Toxicology 2009, 6:24'
'CuO'	79.545	NaN	'24 h'	'aBlue'	'IC50'	30	0.000377145	'A549'	'Human cells'	-3.42349	'Seiffert et al., 2012,Chem. Res. Toxicol., 25, 140–152'
'CuO'	79.545	NaN	'24 h'	'Impedance'	'IC50'	30	0.000377145	'A549'	'Human cells'	-3.42349	'Seiffert et al., 2012,Chem. Res. Toxicol., 25, 140–152'
'CuO'	79.545	NaN	'24 h'	'WST-1'	'IC50'	30	0.000377145	'A549'	'Human cells'	-3.42349	'Seiffert et al., 2012,Chem. Res. Toxicol., 25, 140–152'
'CuO'	79.545	NaN	'36 h'	'resazurin fluorescence assay'	'ec50'	32.1	0.000403545	'A549'	'Human cells'	-3.39411	'Titma et al. Cytotechnology. 2016;68(6):2363-2377'
'CuO'	79.545	NaN	'108'	'resazurin fluorescence assay'	'ec50'	36.2	0.000455088	'A549'	'Human cells'	-3.3419	'Titma et al. Cytotechnology. 2016;68(6):2363-2377'
'CuO'	79.545	NaN	'216'	'resazurin fluorescence assay'	'ec50'	37.2	0.00046766	'A549'	'Human cells'	-3.33007	'Titma et al. Cytotechnology. 2016;68(6):2363-2377'
'CuO'	79.545	NaN	'60 h'	'resazurin fluorescence assay'	'ec50'	37.4	0.000470174	'A549'	'Human cells'	-3.32774	'Titma et al. Cytotechnology. 2016;68(6):2363-2377'
'CuO'	79.545	NaN	'12 h'	'resazurin fluorescence assay'	'ec50'	38.2	0.000480231	'A549'	'Human cells'	-3.31855	'Titma et al. Cytotechnology. 2016;68(6):2363-2377'
'CuO'	79.545	NaN	'24 h'	'resazurin fluorescence assay'	'ec50'	43.8	0.000550632	'A549'	'Human cells'	-3.25914	'Titma et al. Cytotechnology. 2016;68(6):2363-2377'
'CuO'	80	50.24	'24 h'	'Cytotoxicity (MTS)'	'ec50 (in SFM medium)'	5	6.25e-05	'A549 cells'	'Human cells'	-4.20412	'Areecheewakul, et al. NanoImpact 18 (2020) 100214'
'CuO'	80	50.24	'24 h'	'Cytotoxicity (PI staining)'	'ec50 (in SCM medium)'	7.5	9.375e-05	'A549 cells'	'Human cells'	-4.02803	'Areecheewakul, et al. NanoImpact 18 (2020) 100214'
'CuO'	80	50.24	'24 h'	'Cytotoxicity (PI staining)'	'ec50 (in SFM medium)'	75	0.0009375	'A549 cells'	'Human cells'	-3.02803	'Areecheewakul, et al. NanoImpact 18 (2020) 100214'
'CuO'	80	28.5	'24 h'	'MTS assay'	'EC50'	160	0.002	'A549 CELLS'	'Human cells'	-2.69897	'Jeong et al. Front Pharmacol. 2018 22;9:15.'
'Fe2O3'	160	39	'24 h'	'MTT assay'	'ec50'	1000	0.00625	'A549'	'Human cells'	-2.20412	'Horie et al. Metallomics, 2012, 4, 350–360'
'Fe2O3'	160	NaN	'24 h'	'Cellular proliferation colorimetric assay'	'LD 50'	1000	0.00625	'A549'	'Human cells'	-2.20412	'Lozano et al 2011 J. Phys.: Conf. Ser. 304 012046'
'Fe2O3'	160	NaN	'48 h'	'Cellular proliferation colorimetric assay'	'LD 50'	1000	0.00625	'A549'	'Human cells'	-2.20412	'Lozano et al 2011 J. Phys.: Conf. Ser. 304 012046'
'Fe2O3'	160	20.93	'24 h'	'CCK-8 cytotoxicity assay'	'EC50'	651.808	0.0040738	'A549 cells'	'Human cells'	-2.39	'Cao et al. Green Chem., 2020,22, 3512-3521'
'Gd2O3'	362	72.76	'24 h'	'CCK-8 cytotoxicity assay'	'EC50'	952.157	0.00263027	'A549 cells'	'Human cells'	-2.58	'Cao et al. Green Chem., 2020,22, 3512-3521'
'In2O3'	278	77.15	'24 h'	'CCK-8 cytotoxicity assay'	'EC50'	326.622	0.0011749	'A549 cells'	'Human cells'	-2.93	'Cao et al. Green Chem., 2020,22, 3512-3521'
'La2O3'	326	75.81	'24 h'	'CCK-8 cytotoxicity assay'	'EC50'	450.005	0.00138038	'A549 cells'	'Human cells'	-2.86	'Cao et al. Green Chem., 2020,22, 3512-3521'
'MgO'	40	NaN	'24 h'	'NRU assay'	'IC50'	NaN	NaN	'A549'	'Human cells'	NaN	'Ivansk et al. Curr Top Med Chem., 2015;15(18):1914-29'
'MgO'	40	23.8	'24 h'	'Cytotoxicity (MTS)'	'ec50 (in SFM medium)'	NaN	NaN	'A549 cells'	'Human cells'	NaN	'Areecheewakul, et al. NanoImpact 18 (2020) 100214'
'MgO'	40	23.8	'24 h'	'Cytotoxicity (MTS)'	'ec50 (in SCM medium)'	NaN	NaN	'A549 cells'	'Human cells'	NaN	'Areecheewakul, et al. NanoImpact 18 (2020) 100214'
'MgO'	40	23.8	'24 h'	'Cytotoxicity (PI staining)'	'ec50 (in SCM medium)'	150	0.00375	'A549 cells'	'Human cells'	-2.42597	'Areecheewakul, et al. NanoImpact 18 (2020) 100214'
'Mn2O3'	158	36.87	'24 h'	'CCK-8 cytotoxicity assay'	'EC50'	22.3181	0.000141254	'A549 cells'	'Human cells'	-3.85	'Cao et al. Green Chem., 2020,22, 3512-3521'
'Mn3O4'	229	14.9	'24 h'	'NRU assay'	'IC50'	136.2	0.00059476	'A549'	'Human cells'	-3.22566	'Ivansk et al. Curr Top Med Chem., 2015;15(18):1914-29'
'Mn3o4'	229	NaN	'108'	'resazurin fluorescence assay'	'ec50'	31.8	0.000138865	'A549'	'Human cells'	-3.85741	'Titma et al. Cytotechnology. 2016;68(6):2363-2377'
'Mn3o4'	229	NaN	'60 h'	'resazurin fluorescence assay'	'ec50'	39.2	0.000171179	'A549'	'Human cells'	-3.76655	'Titma et al. Cytotechnology. 2016;68(6):2363-2377'
'Mn3o4'	229	NaN	'216'	'resazurin fluorescence assay'	'ec50'	47.1	0.000205677	'A549'	'Human cells'	-3.68681	'Titma et al. Cytotechnology. 2016;68(6):2363-2377'
'Mn3o4'	229	NaN	'36 h'	'resazurin fluorescence assay'	'ec50'	90.6	0.000395633	'A549'	'Human cells'	-3.40271	'Titma et al. Cytotechnology. 2016;68(6):2363-2377'
'Ni'	59	NaN	'24 h'	'Neutral Red assay.'	'IC50'	1032	0.0174915	'a549'	'Human cells'	-1.75717	'Lanone et al. Particle and Fibre Toxicology 2009, 6:28'
'Ni'	59	NaN	'24 h'	'Neutral Red assay.'	'IC50'	509.9	0.00864237	'a549'	'Human cells'	-2.06337	'Lanone et al. Particle and Fibre Toxicology 2009, 6:29'
'NiO'	75	48.9	'24 h'	'MTT assay'	'IC50'	994.9	0.0132653	'a549'	'Human cells'	-1.87728	'Lanone et al. Particle and Fibre Toxicology 2009, 6:14'
'NiO'	75	10.96	'24 h'	'CCK-8 cytotoxicity assay'	'EC50'	90.1698	0.00120226	'A549 cells'	'Human cells'	-2.92	'Cao et al. Green Chem., 2020,22, 3512-3521'
'Sb2O3'	292	20.8	'24 h'	'NRU assay'	'IC50'	79.9	0.00027363	'A549'	'Human cells'	-3.56284	'Ivansk et al. Curr Top Med Chem., 2015;15(18):1914-29'
'Sb2O3'	292	NaN	'216'	'resazurin fluorescence assay'	'ec50'	22	7.53425e-05	'A549'	'Human cells'	-4.12296	'Titma et al. Cytotechnology. 2016;68(6):2363-2377'
'Sb2O3'	292	NaN	'108'	'resazurin fluorescence assay'	'ec50'	38.5	0.000131849	'A549'	'Human cells'	-3.87992	'Titma et al. Cytotechnology. 2016;68(6):2363-2377'
'Sb2O3'	292	NaN	'60 h'	'resazurin fluorescence assay'	'ec50'	59.1	0.000202397	'A549'	'Human cells'	-3.6938	'Titma et al. Cytotechnology. 2016;68(6):2363-2377'
'Sb2O3'	292	NaN	'36 h'	'resazurin fluorescence assay'	'ec50'	84.6	0.000289726	'A549'	'Human cells'	-3.53801	'Titma et al. Cytotechnology. 2016;68(6):2363-2377'
'Sb2O3'	292	107.91	'24 h'	'CCK-8 cytotoxicity assay'	'EC50'	422.068	0.00144544	'A549 cells'	'Human cells'	-2.84	'Cao et al. Green Chem., 2020,22, 3512-3521'
'SnO2'	151	21	'24 h'	'MTT assay'	'ec50'	1000	0.00662252	'A549'	'Human cells'	-2.17898	'Horie et al. Metallomics, 2012, 4, 350–360'
'SnO2'	151	26.85	'24 h'	'CCK-8 cytotoxicity assay'	'EC50'	5482.48	0.0363078	'A549 cells'	'Human cells'	-1.44	'Cao et al. Green Chem., 2020,22, 3512-3521'
'TiO2'	80	NaN	'24 h'	'MTT assay'	'ec50'	1000	0.0125	'A549'	'Human cells'	-1.90309	'Horie et al. Metallomics, 2012, 4, 350–360'
'TiO2'	80	NaN	'24 h'	'MTT assay'	'ec50'	1000	0.0125	'A549'	'Human cells'	-1.90309	'Horie et al. Metallomics, 2012, 4, 350–360'
'TiO2'	80	NaN	'24 h'	'Cellular proliferation colorimetric assay'	'LD 50'	1000	0.0125	'A549'	'Human cells'	-1.90309	'Lozano et al 2011 J. Phys.: Conf. Ser. 304 012046'
'TiO2'	80	NaN	'48 h'	'Cellular proliferation colorimetric assay'	'LD 50'	1000	0.0125	'A549'	'Human cells'	-1.90309	'Lozano et al 2011 J. Phys.: Conf. Ser. 304 012046'
'TiO2'	80	NaN	'24 h'	'aBlue'	'IC50'	NaN	NaN	'A549'	'Human cells'	NaN	'Seiffert et al., 2012,Chem. Res. Toxicol., 25, 140–152'
'TiO2'	80	NaN	'24 h'	'Impedance'	'IC50'	NaN	NaN	'A549'	'Human cells'	NaN	'Seiffert et al., 2012,Chem. Res. Toxicol., 25, 140–152'
'TiO2'	80	NaN	'24 h'	'MTT'	'IC50'	NaN	NaN	'A549'	'Human cells'	NaN	'Seiffert et al., 2012,Chem. Res. Toxicol., 25, 140–152'
'TiO2'	80	NaN	'24 h'	'NRU assay'	'IC50'	NaN	NaN	'A549'	'Human cells'	NaN	'Seiffert et al., 2012,Chem. Res. Toxicol., 25, 140–152'
'TiO2'	80	NaN	'24 h'	'WST-1'	'IC50'	NaN	NaN	'A549'	'Human cells'	NaN	'Seiffert et al., 2012,Chem. Res. Toxicol., 25, 140–152'
'TiO2'	80	NaN	'36 h'	'resazurin fluorescence assay'	'ec50'	NaN	NaN	'A549'	'Human cells'	NaN	'Titma et al. Cytotechnology. 2016;68(6):2363-2377'
'TiO2'	80	NaN	'12 h'	'resazurin fluorescence assay'	'ec50'	NaN	NaN	'A549'	'Human cells'	NaN	'Titma et al. Cytotechnology. 2016;68(6):2363-2377'
'TiO2'	80	NaN	'24 h'	'resazurin fluorescence assay'	'ec50'	NaN	NaN	'A549'	'Human cells'	NaN	'Titma et al. Cytotechnology. 2016;68(6):2363-2377'
'TiO2'	80	NaN	'60 h'	'resazurin fluorescence assay'	'ec50'	NaN	NaN	'A549'	'Human cells'	NaN	'Titma et al. Cytotechnology. 2016;68(6):2363-2377'
'TiO2'	80	NaN	'108'	'resazurin fluorescence assay'	'ec50'	NaN	NaN	'A549'	'Human cells'	NaN	'Titma et al. Cytotechnology. 2016;68(6):2363-2377'
'TiO2'	80	NaN	'216'	'resazurin fluorescence assay'	'ec50'	NaN	NaN	'A549'	'Human cells'	NaN	'Titma et al. Cytotechnology. 2016;68(6):2363-2377'
'TiO2'	80	NaN	'36 h'	'resazurin fluorescence assay'	'ec50'	NaN	NaN	'A549'	'Human cells'	NaN	'Titma et al. Cytotechnology. 2016;68(6):2363-2377'
'TiO2'	80	NaN	'12 h'	'resazurin fluorescence assay'	'ec50'	NaN	NaN	'A549'	'Human cells'	NaN	'Titma et al. Cytotechnology. 2016;68(6):2363-2377'
'TiO2'	80	NaN	'24 h'	'resazurin fluorescence assay'	'ec50'	NaN	NaN	'A549'	'Human cells'	NaN	'Titma et al. Cytotechnology. 2016;68(6):2363-2377'
'TiO2'	80	NaN	'216'	'resazurin fluorescence assay'	'ec50'	NaN	NaN	'A549'	'Human cells'	NaN	'Titma et al. Cytotechnology. 2016;68(6):2363-2377'
'TiO2'	80	NaN	'24 h'	'Impedance'	'IC50'	NaN	NaN	'A549'	'Human cells'	NaN	'Seiffert et al., 2012,Chem. Res. Toxicol., 25, 140–152'
'TiO2'	80	NaN	'24 h'	'MTT'	'IC50'	NaN	NaN	'A549'	'Human cells'	NaN	'Seiffert et al., 2012,Chem. Res. Toxicol., 25, 140–152'
'TiO2'	80	NaN	'24 h'	'NRU assay'	'IC50'	NaN	NaN	'A549'	'Human cells'	NaN	'Seiffert et al., 2012,Chem. Res. Toxicol., 25, 140–152'
'TiO2'	80	NaN	'24 h'	'WST-1'	'IC50'	NaN	NaN	'A549'	'Human cells'	NaN	'Seiffert et al., 2012,Chem. Res. Toxicol., 25, 140–152'
'TiO2'	80	21.2	'24 h'	'CCK-8 cytotoxicity assay'	'EC50'	129.745	0.00162181	'A549 cells'	'Human cells'	-2.79	'Cao et al. Green Chem., 2020,22, 3512-3521'
'TiO2'	80	39.9	'24 h'	'MTS assay'	'EC50'	4000	0.004	'A549 CELLS'	'Human cells'	-2.39794	'Jeong et al. Front Pharmacol. 2018 22;9:15.'
'TiO2'	80	113.4	'24 h'	'Cytotoxicity (MTS)'	'ec50 (in SFM medium)'	NaN	NaN	'A549 cells'	'Human cells'	NaN	'Areecheewakul, et al. NanoImpact 18 (2020) 100214'
'TiO2'	80	113.4	'24 h'	'Cytotoxicity (MTS)'	'ec50 (in SCM medium)'	NaN	NaN	'A549 cells'	'Human cells'	NaN	'Areecheewakul, et al. NanoImpact 18 (2020) 100214'
'TiO2'	80	113.4	'24 h'	'Cytotoxicity (PI staining)'	'ec50 (in SFM medium)'	NaN	NaN	'A549 cells'	'Human cells'	NaN	'Areecheewakul, et al. NanoImpact 18 (2020) 100214'
'TiO2'	80	113.4	'24 h'	'Cytotoxicity (PI staining)'	'ec50 (in SCM medium)'	NaN	NaN	'A549 cells'	'Human cells'	NaN	'Areecheewakul, et al. NanoImpact 18 (2020) 100214'
'WO3'	232	40.08	'24 h'	'CCK-8 cytotoxicity assay'	'EC50'	1274.93	0.00549541	'A549 cells'	'Human cells'	-2.26	'Cao et al. Green Chem., 2020,22, 3512-3521'
'Y2O3'	226	33	'24 h'	'MTT assay'	'ec50'	1000	0.00442478	'A549'	'Human cells'	-2.35411	'Horie et al. Metallomics, 2012, 4, 350–360'
'Y2O3'	226	41.89	'24 h'	'CCK-8 cytotoxicity assay'	'EC50'	247.804	0.00109648	'A549 cells'	'Human cells'	-2.96	'Cao et al. Green Chem., 2020,22, 3512-3521'
'ZnO'	81	21	'24 h'	'MTT assay'	'ec50'	100	0.00123457	'A549'	'Human cells'	-2.90849	'Horie et al. Metallomics, 2012, 4, 350–360'
'ZnO'	81	21	'24 h'	'MTT assay'	'ec50'	100	0.00123457	'A549'	'Human cells'	-2.90849	'Horie et al. Metallomics, 2012, 4, 350–360'
'ZnO'	81	53.6	'24 h'	'MTT assay'	'IC50'	34.31	0.00042358	'a549'	'Human cells'	-3.37306	'Lanone et al. Particle and Fibre Toxicology 2009, 6:14'
'ZnO'	81	NaN	'24 h'	'Cellular proliferation colorimetric assay'	'LD 50'	250	0.00308642	'A549'	'Human cells'	-2.51055	'Lozano et al 2011 J. Phys.: Conf. Ser. 304 012046'
'ZnO'	81	NaN	'48 h'	'Cellular proliferation colorimetric assay'	'LD 50'	75	0.000925926	'A549'	'Human cells'	-3.03342	'Lozano et al 2011 J. Phys.: Conf. Ser. 304 012046'
'ZnO'	81	NaN	'24 h'	'aBlue'	'IC50'	60	0.000740741	'A549'	'Human cells'	-3.13033	'Seiffert et al., 2012,Chem. Res. Toxicol., 25, 140–152'
'ZnO'	81	NaN	'24 h'	'Impedance'	'IC50'	60	0.000740741	'A549'	'Human cells'	-3.13033	'Seiffert et al., 2012,Chem. Res. Toxicol., 25, 140–152'
'ZnO'	81	NaN	'24 h'	'MTT'	'IC50'	60	0.000740741	'A549'	'Human cells'	-3.13033	'Seiffert et al., 2012,Chem. Res. Toxicol., 25, 140–152'
'ZnO'	81	NaN	'24 h'	'NRU assay'	'IC50'	60	0.000740741	'A549'	'Human cells'	-3.13033	'Seiffert et al., 2012,Chem. Res. Toxicol., 25, 140–152'
'ZnO'	81	NaN	'24 h'	'WST-1'	'IC50'	60	0.000740741	'A549'	'Human cells'	-3.13033	'Seiffert et al., 2012,Chem. Res. Toxicol., 25, 140–152'
'ZnO'	81	NaN	'36 h'	'resazurin fluorescence assay'	'ec50'	42.8	0.000528395	'A549'	'Human cells'	-3.27704	'Titma et al. Cytotechnology. 2016;68(6):2363-2377'
'ZnO'	81	NaN	'60 h'	'resazurin fluorescence assay'	'ec50'	46	0.000567901	'A549'	'Human cells'	-3.24573	'Titma et al. Cytotechnology. 2016;68(6):2363-2377'
'ZnO'	81	NaN	'12 h'	'resazurin fluorescence assay'	'ec50'	117.6	0.00145185	'A549'	'Human cells'	-2.83808	'Titma et al. Cytotechnology. 2016;68(6):2363-2377'
'ZnO'	81	45.7	'24 h'	'Cytotoxicity (MTS)'	'ec50 (in SFM medium)'	50	0.000617284	'A549 cells'	'Human cells'	-3.20952	'Areecheewakul, et al. NanoImpact 18 (2020) 100214'
'ZnO'	81	45.7	'24 h'	'Cytotoxicity (PI staining)'	'ec50 (in SFM medium)'	7.5	9.25926e-05	'A549 cells'	'Human cells'	-4.03342	'Areecheewakul, et al. NanoImpact 18 (2020) 100214'
'ZnO'	81	39.05	'24 h'	'CCK-8 cytotoxicity assay'	'EC50'	131.367	0.00162181	'A549 cells'	'Human cells'	-2.79	'Cao et al. Green Chem., 2020,22, 3512-3521'
'ZnO'	81	16.5	'24 h'	'MTS assay'	'EC50'	81	0.001	'A549 CELLS'	'Human cells'	-3	'Jeong et al. Front Pharmacol. 2018 22;9:15.'
'ZrO2'	123	NaN	'24 h'	'MTT assay'	'ec50'	1000	0.00813008	'A549'	'Human cells'	-2.08991	'Horie et al. Metallomics, 2012, 4, 350–360'
'ZrO2'	123	19.87	'24 h'	'CCK-8 cytotoxicity assay'	'EC50'	1202	0.00977237	'A549 cells'	'Human cells'	-2.01	'Cao et al. Green Chem., 2020,22, 3512-3521'
A549 Cells- Traning data
NP	Molar weight (g/mol)	Size	Exposure time	Assay	Endpoint	Value (mg/l	Value(mol/L)	Cell type	Cell group	Log(endpoint)	reference
'Al2O3'	102	11.9	'24 h'	'CCK-8 cytotoxicity assay'	'EC50'	705.668	0.00691831	'A549 cells'	'Human cells'	-2.16	'Cao et al. Green Chem., 2020,22, 3512-3521'
'Bi2O3'	466	164.97	'24 h'	'CCK-8 cytotoxicity assay'	'EC50'	337.587	0.000724436	'A549 cells'	'Human cells'	-3.14	'Cao et al. Green Chem., 2020,22, 3512-3521'
'CeO2'	172	NaN	'24 h'	'Cellular proliferation colorimetric assay'	'LD 50'	1000	0.00581395	'A549'	'Human cells'	-2.23553	'Lozano et al 2011 J. Phys.: Conf. Ser. 304 012046'
'Co'	59	20	'24 h'	'Neutral Red assay.'	'IC50'	1243	0.0210678	'a549'	'Human cells'	-1.67638	'Lanone et al. Particle and Fibre Toxicology 2009, 6:26'
'Cu'	64	90	'24 h'	'MTT assay'	'IC50'	33.74	0.000527187	'a549'	'Human cells'	-3.27803	'Lanone et al. Particle and Fibre Toxicology 2009, 6:14'
'Cu2O'	143	NaN	'24 h'	'Neutral Red assay.'	'IC50'	164.7	0.00115175	'a549'	'Human cells'	-2.93864	'Lanone et al. Particle and Fibre Toxicology 2009, 6:20'
'CuO'	79.545	48	'24 h'	'MTT assay'	'ec50'	100	0.00125715	'A549'	'Human cells'	-2.90061	'Horie et al. Metallomics, 2012, 4, 350–360'
'CuO'	79.545	45.4	'24 h'	'MTT assay'	'IC50'	35.61	0.000447671	'a549'	'Human cells'	-3.34904	'Lanone et al. Particle and Fibre Toxicology 2009, 6:14'
'CuO'	79.545	NaN	'24 h'	'MTT'	'IC50'	30	0.000377145	'A549'	'Human cells'	-3.42349	'Seiffert et al., 2012,Chem. Res. Toxicol., 25, 140–152'
'CuO'	79.545	NaN	'24 h'	'NRU assay'	'IC50'	30	0.000377145	'A549'	'Human cells'	-3.42349	'Seiffert et al., 2012,Chem. Res. Toxicol., 25, 140–152'
'CuO'	80	50.24	'24 h'	'Cytotoxicity (MTS)'	'ec50 (in SCM medium)'	50	0.000625	'A549 cells'	'Human cells'	-3.20412	'Areecheewakul, et al. NanoImpact 18 (2020) 100214'
'Gd2O3'	362	NaN	'24 h'	'MTT assay'	'ec50'	NaN	NaN	'A549'	'Human cells'	NaN	'Horie et al. Metallomics, 2012, 4, 350–360'
'HfO2'	210	43.86	'24 h'	'CCK-8 cytotoxicity assay'	'EC50'	1236.57	0.00588844	'A549 cells'	'Human cells'	-2.23	'Cao et al. Green Chem., 2020,22, 3512-3521'
'La2O3'	326	NaN	'24 h'	'MTT assay'	'ec50'	NaN	NaN	'A549'	'Human cells'	NaN	'Horie et al. Metallomics, 2012, 4, 350–360'
'MgO'	40	20	'24 h'	'MTT assay'	'ec50'	1000	0.025	'A549'	'Human cells'	-1.60206	'Horie et al. Metallomics, 2012, 4, 350–360'
'MgO'	40	23.8	'24 h'	'Cytotoxicity (PI staining)'	'ec50 (in SFM medium)'	150	0.00375	'A549 cells'	'Human cells'	-2.42597	'Areecheewakul, et al. NanoImpact 18 (2020) 100214'
MoO3	144	100	24 h	MTT assay	ec50	1000	0.00694444	A549	Human cells	-2.15836	Horie et al. Metallomics, 2012, 4, 350–360
'SiO2'	60	12	'24 h'	'NRU assay'	'IC50'	NaN	NaN	'A549'	'Human cells'	NaN	'Ivansk et al. Curr Top Med Chem., 2015;15(18):1914-29'
'SiO2'	60	15.23	'24 h'	'CCK-8 cytotoxicity assay'	'EC50'	293.867	0.00489779	'A549 cells'	'Human cells'	-2.31	'Cao et al. Green Chem., 2020,22, 3512-3521'
'TiO2'	80	NaN	'24 h'	'MTT assay'	'ec50'	1000	0.0125	'A549'	'Human cells'	-1.90309	'Horie et al. Metallomics, 2012, 4, 350–360'
'TiO2'	80	14.2	'24 h'	'NRU assay'	'IC50'	NaN	NaN	'A549'	'Human cells'	NaN	'Ivansk et al. Curr Top Med Chem., 2015;15(18):1914-29'
'TiO2'	80	NaN	'60 h'	'resazurin fluorescence assay'	'ec50'	NaN	NaN	'A549'	'Human cells'	NaN	'Titma et al. Cytotechnology. 2016;68(6):2363-2377'
'TiO2'	80	NaN	'108'	'resazurin fluorescence assay'	'ec50'	NaN	NaN	'A549'	'Human cells'	NaN	'Titma et al. Cytotechnology. 2016;68(6):2363-2377'
'TiO2'	80	NaN	'24 h'	'aBlue'	'IC50'	NaN	NaN	'A549'	'Human cells'	NaN	'Seiffert et al., 2012,Chem. Res. Toxicol., 25, 140–152'
'WO3'	232	30	'24 h'	'MTT assay'	'ec50'	1000	0.00431034	'A549'	'Human cells'	-2.36549	'Horie et al. Metallomics, 2012, 4, 350–360'
'Yb2O3'	394	99.85	'24 h'	'CCK-8 cytotoxicity assay'	'EC50'	556.54	0.00141254	'A549 cells'	'Human cells'	-2.85	'Cao et al. Green Chem., 2020,22, 3512-3521'
'ZnO'	81	19.7	'24 h'	'NRU assay'	'IC50'	24.9	0.000307407	'A549'	'Human cells'	-3.51229	'Ivansk et al. Curr Top Med Chem., 2015;15(18):1914-29'
'ZnO'	81	53.6	'24 h'	'MTT assay'	'IC50'	66.17	0.000816914	'a549'	'Human cells'	-3.08782	'Lanone et al. Particle and Fibre Toxicology 2009, 6:14'
'ZnO'	81	NaN	'216'	'resazurin fluorescence assay'	'ec50'	41.1	0.000507407	'A549'	'Human cells'	-3.29464	'Titma et al. Cytotechnology. 2016;68(6):2363-2377'
'ZnO'	81	NaN	'108'	'resazurin fluorescence assay'	'ec50'	46.8	0.000577778	'A549'	'Human cells'	-3.23824	'Titma et al. Cytotechnology. 2016;68(6):2363-2377'
'ZnO'	81	45.7	'24 h'	'Cytotoxicity (MTS)'	'ec50 (in SCM medium)'	50	0.000617284	'A549 cells'	'Human cells'	-3.20952	'Areecheewakul, et al. NanoImpact 18 (2020) 100214'
'ZnO'	81	45.7	'24 h'	'Cytotoxicity (PI staining)'	'ec50 (in SCM medium)'	75	0.000925926	'A549 cells'	'Human cells'	-3.03342	'Areecheewakul, et al. NanoImpact 18 (2020) 100214'
'ZrO2'	123	32	'24 h'	'MTT assay'	'IC50'	911.2	0.00740813	'a549'	'Human cells'	-2.13029	'Lanone et al. Particle and Fibre Toxicology 2009, 6:14'
'ZrO2'	123	32	'24 h'	'MTT assay'	'IC50'	82.88	0.000673821	'a549'	'Human cells'	-3.17146	'Lanone et al. Particle and Fibre Toxicology 2009, 6:14'

## Sheet: E. coli
E. coli- Traning data
NP	Molar weight (g/mol)	Size	Exposure time	Assay	Endpoint	Value (mg/l	Value(mol/L)	Cell type	Cell group	Log(endpoint)	reference
'Ag'	108	'<100'	'30 min'	'luminescence inhbition'	'ec50'	571	0.00528704	'E. coli AB1157'	'Bacteria'	-2.27679	'Ivansk et al Anal Bioanal Chem (2010) 398:701–716'
'Ag'	108	'<100'	'2 h'	'luminescence inhbition'	'ec50'	3.11	2.87963e-05	'E. coli AS391'	'Bacteria'	-4.54066	'Ivansk et al Anal Bioanal Chem (2010) 398:701–716'
'Ag'	108	'<100'	'30 min'	'luminescence inhbition'	'ec50'	5.8	5.37037e-05	'E. coli AS391'	'Bacteria'	-4.27	'Ivansk et al Anal Bioanal Chem (2010) 398:701–716'
'Ag'	108	'<100'	'2 h'	'luminescence inhbition'	'ec50'	19.7	0.000182407	'E. coli AS393'	'Bacteria'	-3.73896	'Ivansk et al Anal Bioanal Chem (2010) 398:701–716'
'Ag'	108	'<100'	'30 min'	'luminescence inhbition'	'ec50'	329	0.0030463	'E. coli AS393'	'Bacteria'	-2.51623	'Ivansk et al Anal Bioanal Chem (2010) 398:701–716'
'Ag'	108	'<100'	'2 h'	'luminescence inhbition'	'ec50'	30.9	0.000286111	'E. coli JI130'	'Bacteria'	-3.54347	'Ivansk et al Anal Bioanal Chem (2010) 398:701–716'
'Ag'	108	'<100'	'30 min'	'luminescence inhbition'	'ec50'	331	0.00306481	'E. coli JI130'	'Bacteria'	-2.5136	'Ivansk et al Anal Bioanal Chem (2010) 398:701–716'
'Ag'	108	'<100'	'30 min'	'luminescence inhbition'	'ec50'	485	0.00449074	'E. coli JI131'	'Bacteria'	-2.34768	'Ivansk et al Anal Bioanal Chem (2010) 398:701–716'
'Ag'	108	'<100'	'30 min'	'luminescence inhbition'	'ec50'	17.9	0.000165741	'E. coli JI132'	'Bacteria'	-3.78057	'Ivansk et al Anal Bioanal Chem (2010) 398:701–716'
'Ag'	108	'20.4'	'4 h'	'growth inhibition assay'	'ec50'	3.1	2.87037e-05	'Escherichia Coli'	'Bacteria'	-4.54206	'Bondarenko et al. Nanotoxicology, 2016; 10(9): 1229–1242'
'Al2O3'	102	'30-40'	'2 h'	'Cytotoxicity assay'	'LD50'	326.1	0.00319706	'E.coli'	'Bacteria'	-2.49525	'Hu et al. Sci. Total Environ. 407 (2009) 3070–3072'
'Al2O3'	102	'14.7'	'24 h'	'growth inhibition assay'	'IC50'	500	0.00490196	'E.coli'	'Bacteria'	-2.30963	'Kaweeteerawat et al. Environ. Sci. Technol. 2015, 49, 1105−1112'
'Al2O3'	102	'15-90'	'2 h'	'Cell viability assay CFU'	'EC50'	330.066	0.00323594	'E.coli'	'Bacteria'	-2.49	'Puzyn et al. Nature Nanotech 6, 175–178 (2011)'
'Bi2O3'	466	'144'	'30 min'	'Cell viability assay CFU'	'LC50'	131.337	0.000281838	'E.coli'	'Bacteria'	-3.55	'Pathakoti et al. Journal of Photochemistry and Photobiology B: Biology 130 (2014) 234–240'
'CeO2'	172	'18.3'	'24 h'	'growth inhibition assay'	'IC50'	NaN	NaN	'E.coli'	'Bacteria'	NaN	'Kaweeteerawat et al. Environ. Sci. Technol. 2015, 49, 1105−1112'
'Co3O4'	241	'51-132'	'2 h'	'Cell Viability CFU assay'	'ec50'	240	0.000995851	'E Coli'	'Bacteria'	-3.00181	'Kar et al. Chemosphere 264 (2021) 128428'
'Co3O4'	241	'10'	'24 h'	'growth inhibition assay'	'IC50'	138	0.000572614	'E.coli'	'Bacteria'	-3.24214	'Kaweeteerawat et al. Environ. Sci. Technol. 2015, 49, 1105−1112'
'Co3O4'	241	'78.3'	'30 min'	'Cytotoxicity assays'	'LC50'	55.56	0.000230539	'Escherichia Coli'	'Bacteria'	-3.63725	'Dasari et al. J Environ Sci, 2013;25(5):882-8'
'CoO'	75	'71.8'	'24 h'	'growth inhibition assay'	'IC50'	43	0.000573333	'E.coli'	'Bacteria'	-3.24159	'Kaweeteerawat et al. Environ. Sci. Technol. 2015, 49, 1105−1112'
'CoO'	75	'55'	'30 min'	'Cell viability assay CFU'	'LC50'	55.5983	0.00074131	'E.coli'	'Bacteria'	-3.13	'Pathakoti et al. Journal of Photochemistry and Photobiology B: Biology 130 (2014) 234–240'
'Cr2O3'	152	'193'	'24 h'	'growth inhibition assay'	'IC50'	232	0.00152632	'E.coli'	'Bacteria'	-2.81636	'Kaweeteerawat et al. Environ. Sci. Technol. 2015, 49, 1105−1112'
'Cr2O3'	152	'47'	'30 min'	'Cell viability assay CFU'	'LC50'	1323.86	0.00870964	'E.coli'	'Bacteria'	-2.06	'Pathakoti et al. Journal of Photochemistry and Photobiology B: Biology 130 (2014) 234–240'
'Cr2O3'	152	'15-90'	'2 h'	'Cell viability assay CFU'	'EC50'	469.725	0.0030903	'E.coli'	'Bacteria'	-2.51	'Puzyn et al. Nature Nanotech 6, 175–178 (2011)'
'CuO'	79.545	'30'	'2 h'	'luminescence inhbition'	'ec50'	10.1	0.000126972	'E. coli AB1157'	'Bacteria'	-3.89629	'Ivansk et al Anal Bioanal Chem (2010) 398:701–716'
'CuO'	79.545	'30'	'30 min'	'luminescence inhbition'	'ec50'	50.5	0.000634861	'E. coli AB1157'	'Bacteria'	-3.19732	'Ivansk et al Anal Bioanal Chem (2010) 398:701–716'
'CuO'	79.545	'30'	'2 h'	'luminescence inhbition'	'ec50'	2.53	3.18059e-05	'E. coli AS391'	'Bacteria'	-4.49749	'Ivansk et al Anal Bioanal Chem (2010) 398:701–716'
'CuO'	79.545	'30'	'30 min'	'luminescence inhbition'	'ec50'	11.4	0.000143315	'E. coli AS391'	'Bacteria'	-3.84371	'Ivansk et al Anal Bioanal Chem (2010) 398:701–716'
'CuO'	79.545	'30'	'2 h'	'luminescence inhbition'	'ec50'	9.85	0.000123829	'E. coli AS393'	'Bacteria'	-3.90718	'Ivansk et al Anal Bioanal Chem (2010) 398:701–716'
'CuO'	79.545	'30'	'30 min'	'luminescence inhbition'	'ec50'	47.6	0.000598403	'E. coli AS393'	'Bacteria'	-3.22301	'Ivansk et al Anal Bioanal Chem (2010) 398:701–716'
'CuO'	79.545	'30'	'30 min'	'luminescence inhbition'	'ec50'	39.7	0.000499089	'E. coli JI130'	'Bacteria'	-3.30182	'Ivansk et al Anal Bioanal Chem (2010) 398:701–716'
'CuO'	79.545	'30'	'30 min'	'luminescence inhbition'	'ec50'	33	0.00041486	'E. coli JI131'	'Bacteria'	-3.3821	'Ivansk et al Anal Bioanal Chem (2010) 398:701–716'
'CuO'	79.545	'30'	'2 h'	'luminescence inhbition'	'ec50'	3.25	4.08574e-05	'E. coli JI132'	'Bacteria'	-4.38873	'Ivansk et al Anal Bioanal Chem (2010) 398:701–716'
'CuO'	79.545	'30'	'30 min'	'luminescence inhbition'	'ec50'	14.8	0.000186058	'E. coli JI132'	'Bacteria'	-3.73035	'Ivansk et al Anal Bioanal Chem (2010) 398:701–716'
'CuO'	79.545	'12.8'	'24 h'	'growth inhibition assay'	'IC50'	39	0.000490289	'E.coli'	'Bacteria'	-3.30955	'Kaweeteerawat et al. Environ. Sci. Technol. 2015, 49, 1105−1112'
'CuO'	79.545	'30-50'	'1.5 h'	'bioluminescence activity assay'	'EC50'	54.01	0.000678987	'E.coli'	'Bacteria'	-3.16814	'Ko et al. Appl Microbiol Biotechnol (2014) 98:3295–3303'
'CuO'	79.545	'28'	'30 min'	'Cell viability assay CFU'	'LC50'	4.57734	5.7544e-05	'E.coli'	'Bacteria'	-4.24	'Pathakoti et al. Journal of Photochemistry and Photobiology B: Biology 130 (2014) 234–240'
'CuO'	79.545	'15-90'	'2 h'	'Cell viability assay CFU'	'EC50'	50.1895	0.000630957	'E.coli'	'Bacteria'	-3.2	'Puzyn et al. Nature Nanotech 6, 175–178 (2011)'
'CuO'	79.545	'28'	'30 min'	'Cytotoxicity assays'	'LC50'	4.63	5.8206e-05	'Escherichia Coli'	'Bacteria'	-4.23503	'Dasari et al. J Environ Sci, 2013;25(5):882-8'
'Fe2O3'	160	'30-40'	'2 h'	'Cytotoxicity assay'	'LD50'	638.3	0.00398937	'E.coli'	'Bacteria'	-2.3991	'Hu et al. Sci. Total Environ. 407 (2009) 3070–3072'
'Fe2O3'	160	'12.3'	'24 h'	'growth inhibition assay'	'IC50'	NaN	NaN	'E.coli'	'Bacteria'	NaN	'Kaweeteerawat et al. Environ. Sci. Technol. 2015, 49, 1105−1112'
'Fe2O3'	160	'20-40'	'1.5 h'	'bioluminescence activity assay'	'EC50'	1000	0.00625	'E.coli'	'Bacteria'	-2.20412	'Ko et al. Appl Microbiol Biotechnol (2014) 98:3295–3303'
'Fe2O3'	160	'15-90'	'2 h'	'Cell viability assay CFU'	'EC50'	820.578	0.00512861	'E.coli'	'Bacteria'	-2.29	'Puzyn et al. Nature Nanotech 6, 175–178 (2011)'
'Fe3O4'	232	'12'	'24 h'	'growth inhibition assay'	'IC50'	NaN	NaN	'E.coli'	'Bacteria'	NaN	'Kaweeteerawat et al. Environ. Sci. Technol. 2015, 49, 1105−1112'
'Gd2O3'	362	'43.8'	'24 h'	'growth inhibition assay'	'IC50'	NaN	NaN	'E.coli'	'Bacteria'	NaN	'Kaweeteerawat et al. Environ. Sci. Technol. 2015, 49, 1105−1112'
'HfO2'	210	'28.4'	'24 h'	'growth inhibition assay'	'IC50'	NaN	NaN	'E.coli'	'Bacteria'	NaN	'Kaweeteerawat et al. Environ. Sci. Technol. 2015, 49, 1105−1112'
'In2O3'	278	'60'	'30 min'	'Cell viability assay CFU'	'LC50'	411.192	0.00147911	'E.coli'	'Bacteria'	-2.83	'Pathakoti et al. Journal of Photochemistry and Photobiology B: Biology 130 (2014) 234–240'
'In2O3'	278	'15-90'	'2 h'	'Cell viability assay CFU'	'EC50'	430.571	0.00154882	'E.coli'	'Bacteria'	-2.81	'Puzyn et al. Nature Nanotech 6, 175–178 (2011)'
'In2O3'	278	'59.6'	'24 h'	'growth inhibition assay'	'IC50'	NaN	NaN	'E.coli'	'Bacteria'	NaN	'Kaweeteerawat et al. Environ. Sci. Technol. 2015, 49, 1105−1112'
'La2O3'	326	'30-40'	'2 h'	'Cytotoxicity assay'	'LD50'	456.9	0.00140153	'E.coli'	'Bacteria'	-2.8534	'Hu et al. Sci. Total Environ. 407 (2009) 3070–3072'
'La2O3'	326	'65'	'30 min'	'Cell viability assay CFU'	'LC50'	3.57452	1.09648e-05	'E.coli'	'Bacteria'	-4.96	'Pathakoti et al. Journal of Photochemistry and Photobiology B: Biology 130 (2014) 234–240'
'La2O3'	326	'15-90'	'2 h'	'Cell viability assay CFU'	'EC50'	439.762	0.00134896	'E.coli'	'Bacteria'	-2.87	'Puzyn et al. Nature Nanotech 6, 175–178 (2011)'
'La2O3'	326	'24.6'	'24 h'	'growth inhibition assay'	'IC50'	NaN	NaN	'E.coli'	'Bacteria'	NaN	'Kaweeteerawat et al. Environ. Sci. Technol. 2015, 49, 1105−1112'
'Mn2O3'	158	'40-60'	'2 h'	'Cell Viability CFU assay'	'ec50'	130	0.000822785	'E Coli'	'Bacteria'	-3.08471	'Kar et al. Chemosphere 264 (2021) 128428'
'Mn2O3'	158	'51.5'	'24 h'	'growth inhibition assay'	'IC50'	70	0.000443038	'E.coli'	'Bacteria'	-3.35356	'Kaweeteerawat et al. Environ. Sci. Technol. 2015, 49, 1105−1112'
'Ni2O3'	165	'140.6'	'24 h'	'growth inhibition assay'	'IC50'	181	0.00109697	'E.coli'	'Bacteria'	-2.95981	'Kaweeteerawat et al. Environ. Sci. Technol. 2015, 49, 1105−1112'
'NiO'	75	'14'	'30 min'	'Cell viability assay CFU'	'LC50'	12.1636	0.000162181	'E.coli'	'Bacteria'	-3.79	'Pathakoti et al. Journal of Photochemistry and Photobiology B: Biology 130 (2014) 234–240'
'NiO'	75	'15-90'	'2 h'	'Cell viability assay CFU'	'EC50'	26.611	0.000354813	'E.coli'	'Bacteria'	-3.45	'Puzyn et al. Nature Nanotech 6, 175–178 (2011)'
'NiO'	75	'13.1'	'24 h'	'growth inhibition assay'	'IC50'	NaN	NaN	'E.coli'	'Bacteria'	NaN	'Kaweeteerawat et al. Environ. Sci. Technol. 2015, 49, 1105−1112'
'Sb2O3'	292	'84'	'30 min'	'Cell viability assay CFU'	'LC50'	221.505	0.000758578	'E.coli'	'Bacteria'	-3.12	'Pathakoti et al. Journal of Photochemistry and Photobiology B: Biology 130 (2014) 234–240'
'Sb2O3'	292	'11.8'	'24 h'	'growth inhibition assay'	'IC50'	NaN	NaN	'E.coli'	'Bacteria'	NaN	'Kaweeteerawat et al. Environ. Sci. Technol. 2015, 49, 1105−1112'
'SiO2'	60	'13.5'	'24 h'	'growth inhibition assay'	'IC50'	500	0.00833333	'E.coli'	'Bacteria'	-2.07918	'Kaweeteerawat et al. Environ. Sci. Technol. 2015, 49, 1105−1112'
'SiO2'	60	'20'	'30 min'	'Cell viability assay CFU'	'LC50'	173.042	0.00288403	'E.coli'	'Bacteria'	-2.54	'Pathakoti et al. Journal of Photochemistry and Photobiology B: Biology 130 (2014) 234–240'
'SiO2'	60	'212'	'4 h'	'growth inhibition assay'	'ec50'	NaN	NaN	'Escherichia Coli'	'Bacteria'	NaN	'Bondarenko et al. Nanotoxicology, 2016; 10(9): 1229–1242'
'SnO2'	151	'30-40'	'2 h'	'Cytotoxicity assay'	'LD50'	1045.6	0.0069245	'E.coli'	'Bacteria'	-2.15961	'Hu et al. Sci. Total Environ. 407 (2009) 3070–3072'
'SnO2'	151	'62.4'	'24 h'	'growth inhibition assay'	'IC50'	500	0.00331126	'E.coli'	'Bacteria'	-2.48001	'Kaweeteerawat et al. Environ. Sci. Technol. 2015, 49, 1105−1112'
'SnO2'	151	'15'	'30 min'	'Cell viability assay CFU'	'LC50'	445.633	0.00295121	'E.coli'	'Bacteria'	-2.53	'Pathakoti et al. Journal of Photochemistry and Photobiology B: Biology 130 (2014) 234–240'
'SnO2'	151	'15-90'	'2 h'	'Cell viability assay CFU'	'EC50'	1475.63	0.00977237	'E.coli'	'Bacteria'	-2.01	'Puzyn et al. Nature Nanotech 6, 175–178 (2011)'
'TiO2'	80	'50-70'	'2 h'	'luminescence inhbition'	'ec50'	20000	0.25	'E. coli AB1157'	'Bacteria'	-0.60206	'Ivansk et al Anal Bioanal Chem (2010) 398:701–716'
'TiO2'	80	'50-70'	'30 min'	'luminescence inhbition'	'ec50'	20000	0.25	'E. coli AB1157'	'Bacteria'	-0.60206	'Ivansk et al Anal Bioanal Chem (2010) 398:701–716'
'TiO2'	80	'50-70'	'2 h'	'luminescence inhbition'	'ec50'	20000	0.25	'E. coli AS391'	'Bacteria'	-0.60206	'Ivansk et al Anal Bioanal Chem (2010) 398:701–716'
'TiO2'	80	'50-70'	'30 min'	'luminescence inhbition'	'ec50'	20000	0.25	'E. coli AS391'	'Bacteria'	-0.60206	'Ivansk et al Anal Bioanal Chem (2010) 398:701–716'
'TiO2'	80	'50-70'	'2 h'	'luminescence inhbition'	'ec50'	20000	0.25	'E. coli AS393'	'Bacteria'	-0.60206	'Ivansk et al Anal Bioanal Chem (2010) 398:701–716'
'TiO2'	80	'50-70'	'30 min'	'luminescence inhbition'	'ec50'	20000	0.25	'E. coli AS393'	'Bacteria'	-0.60206	'Ivansk et al Anal Bioanal Chem (2010) 398:701–716'
'TiO2'	80	'50-70'	'2 h'	'luminescence inhbition'	'ec50'	20000	0.25	'E. coli JI130'	'Bacteria'	-0.60206	'Ivansk et al Anal Bioanal Chem (2010) 398:701–716'
'TiO2'	80	'50-70'	'30 min'	'luminescence inhbition'	'ec50'	20000	0.25	'E. coli JI130'	'Bacteria'	-0.60206	'Ivansk et al Anal Bioanal Chem (2010) 398:701–716'
'TiO2'	80	'50-70'	'2 h'	'luminescence inhbition'	'ec50'	20000	0.25	'E. coli JI131'	'Bacteria'	-0.60206	'Ivansk et al Anal Bioanal Chem (2010) 398:701–716'
'TiO2'	80	'50-70'	'30 min'	'luminescence inhbition'	'ec50'	20000	0.25	'E. coli JI131'	'Bacteria'	-0.60206	'Ivansk et al Anal Bioanal Chem (2010) 398:701–716'
'TiO2'	80	'50-70'	'2 h'	'luminescence inhbition'	'ec50'	20000	0.25	'E. coli JI132'	'Bacteria'	-0.60206	'Ivansk et al Anal Bioanal Chem (2010) 398:701–716'
'TiO2'	80	'50-70'	'30 min'	'luminescence inhbition'	'ec50'	20000	0.25	'E. coli JI132'	'Bacteria'	-0.60206	'Ivansk et al Anal Bioanal Chem (2010) 398:701–716'
'TiO2'	80	'30-40'	'2 h'	'Cytotoxicity assay'	'LD50'	1104	0.0138	'E.coli'	'Bacteria'	-1.86012	'Hu et al. Sci. Total Environ. 407 (2009) 3070–3072'
'TiO2'	80	'12.6'	'24 h'	'growth inhibition assay'	'IC50'	500	0.00625	'E.coli'	'Bacteria'	-2.20412	'Kaweeteerawat et al. Environ. Sci. Technol. 2015, 49, 1105−1112'
'TiO2'	80	'<25'	'1.5 h'	'bioluminescence activity assay'	'EC50'	1000	0.0125	'E.coli'	'Bacteria'	-1.90309	'Ko et al. Appl Microbiol Biotechnol (2014) 98:3295–3303'
'TiO2'	80	'42'	'30 min'	'Cell viability assay CFU'	'LC50'	579.549	0.00724436	'E.coli'	'Bacteria'	-2.14	'Pathakoti et al. Journal of Photochemistry and Photobiology B: Biology 130 (2014) 234–240'
'TiO2'	80	'15-90'	'2 h'	'Cell viability assay CFU'	'EC50'	1455.76	0.018197	'E.coli'	'Bacteria'	-1.74	'Puzyn et al. Nature Nanotech 6, 175–178 (2011)'
'TiO2'	80	'42.3'	'30 min'	'Cytotoxicity assays'	'LC50'	583	0.0072875	'Escherichia Coli'	'Bacteria'	-2.13742	'Dasari et al. J Environ Sci, 2013;25(5):882-8'
'TiO2'	80	'5'	'4 h'	'growth inhibition assay'	'ec50'	NaN	NaN	'Escherichia Coli'	'Bacteria'	NaN	'Bondarenko et al. Nanotoxicology, 2016; 10(9): 1229–1242'
'V2O3'	150	'15-90'	'2 h'	'Cell viability assay CFU'	'EC50'	108.665	0.000724436	'E.coli'	'Bacteria'	-3.14	'Puzyn et al. Nature Nanotech 6, 175–178 (2011)'
'WO3'	232	'30-70'	'2 h'	'Cell Viability CFU assay'	'ec50'	2000	0.00862069	'E Coli'	'Bacteria'	-2.06446	'Kar et al. Chemosphere 264 (2021) 128428'
'WO3'	232	'16.6'	'24 h'	'growth inhibition assay'	'IC50'	NaN	NaN	'E.coli'	'Bacteria'	NaN	'Kaweeteerawat et al. Environ. Sci. Technol. 2015, 49, 1105−1112'
'Y2O3'	226	'32.7'	'24 h'	'growth inhibition assay'	'IC50'	NaN	NaN	'E.coli'	'Bacteria'	NaN	'Kaweeteerawat et al. Environ. Sci. Technol. 2015, 49, 1105−1112'
'Y2O3'	226	'15-90'	'2 h'	'Cell viability assay CFU'	'EC50'	304.866	0.00134896	'E.coli'	'Bacteria'	-2.87	'Puzyn et al. Nature Nanotech 6, 175–178 (2011)'
'Yb2O3'	394	'61.7'	'24 h'	'growth inhibition assay'	'IC50'	NaN	NaN	'E.coli'	'Bacteria'	NaN	'Kaweeteerawat et al. Environ. Sci. Technol. 2015, 49, 1105−1112'
'ZnO'	81	'25-70'	'2 h'	'luminescence inhbition'	'ec50'	67.2	0.00082963	'E. coli AB1157'	'Bacteria'	-3.08112	'Ivansk et al Anal Bioanal Chem (2010) 398:701–716'
'ZnO'	81	'25-70'	'2 h'	'luminescence inhbition'	'ec50'	5.54	6.83951e-05	'E. coli AS391'	'Bacteria'	-4.16498	'Ivansk et al Anal Bioanal Chem (2010) 398:701–716'
'ZnO'	81	'25-70'	'2 h'	'luminescence inhbition'	'ec50'	86.8	0.0010716	'E. coli AS393'	'Bacteria'	-2.96997	'Ivansk et al Anal Bioanal Chem (2010) 398:701–716'
'ZnO'	81	'25-70'	'30 min'	'luminescence inhbition'	'ec50'	171	0.00211111	'E. coli AS393'	'Bacteria'	-2.67549	'Ivansk et al Anal Bioanal Chem (2010) 398:701–716'
'ZnO'	81	'25-70'	'2 h'	'luminescence inhbition'	'ec50'	89.1	0.0011	'E. coli JI130'	'Bacteria'	-2.95861	'Ivansk et al Anal Bioanal Chem (2010) 398:701–716'
'ZnO'	81	'25-70'	'30 min'	'luminescence inhbition'	'ec50'	196	0.00241975	'E. coli JI131'	'Bacteria'	-2.61623	'Ivansk et al Anal Bioanal Chem (2010) 398:701–716'
'ZnO'	81	'30-40'	'2 h'	'Cytotoxicity assay'	'LD50'	21.1	0.000260494	'E.coli'	'Bacteria'	-3.5842	'Hu et al. Sci. Total Environ. 407 (2009) 3070–3072'
'ZnO'	81	'22.6'	'24 h'	'growth inhibition assay'	'IC50'	33	0.000407407	'E.coli'	'Bacteria'	-3.38997	'Kaweeteerawat et al. Environ. Sci. Technol. 2015, 49, 1105−1112'
'ZnO'	81	'-'	'1.5 h'	'bioluminescence activity assay'	'EC50'	1.1	1.35802e-05	'E.coli'	'Bacteria'	-4.86709	'Ko et al. Appl Microbiol Biotechnol (2014) 98:3295–3303'
'ZnO'	81	'71'	'30 min'	'Cell viability assay CFU'	'LC50'	0.128376	1.58489e-06	'E.coli'	'Bacteria'	-5.8	'Pathakoti et al. Journal of Photochemistry and Photobiology B: Biology 130 (2014) 234–240'
'ZnO'	81	'15-90'	'2 h'	'Cell viability assay CFU'	'EC50'	28.7399	0.000354813	'E.coli'	'Bacteria'	-3.45	'Puzyn et al. Nature Nanotech 6, 175–178 (2011)'
'ZnO'	81	'13.6'	'4 h'	'growth inhibition assay'	'ec50'	67	0.00082716	'Escherichia Coli'	'Bacteria'	-3.08241	'Bondarenko et al. Nanotoxicology, 2016; 10(9): 1229–1242'
'ZnO'	81	'71'	'30 min'	'Cytotoxicity assays'	'LC50'	0.13	1.60494e-06	'Escherichia Coli'	'Bacteria'	-5.79454	'Dasari et al. J Environ Sci, 2013;25(5):882-8'
'ZrO2'	123	'40.1'	'24 h'	'growth inhibition assay'	'IC50'	500	0.00406504	'E.coli'	'Bacteria'	-2.39094	'Kaweeteerawat et al. Environ. Sci. Technol. 2015, 49, 1105−1112'
'ZrO2'	123	'27'	'30 min'	'Cell viability assay CFU'	'LC50'	323.523	0.00263027	'E.coli'	'Bacteria'	-2.58	'Pathakoti et al. Journal of Photochemistry and Photobiology B: Biology 130 (2014) 234–240'
'ZrO2'	123	'15-90'	'2 h'	'Cell viability assay CFU'	'EC50'	870.773	0.00707946	'E.coli'	'Bacteria'	-2.15	'Puzyn et al. Nature Nanotech 6, 175–178 (2011)'
E. coli- Validation data
NP	Molar weight (g/mol)	Size	Exposure time	Assay	Endpoint	Value (mg/l	Value(mol/L)	Cell type	Cell group	Log(endpoint)	reference
'Ag'	108	'<100'	'2 h'	'luminescence inhbition'	'ec50'	45.9	0.000425	'E. coli AB1157'	'Bacteria'	-3.37161	'Ivansk et al Anal Bioanal Chem (2010) 398:701–716'
'Ag'	108	'<100'	'2 h'	'luminescence inhbition'	'ec50'	18.8	0.000174074	'E. coli JI131'	'Bacteria'	-3.75927	'Ivansk et al Anal Bioanal Chem (2010) 398:701–716'
'Ag'	108	'<100'	'2 h'	'luminescence inhbition'	'ec50'	3.79	3.50926e-05	'E. coli JI132'	'Bacteria'	-4.45478	'Ivansk et al Anal Bioanal Chem (2010) 398:701–716'
'Ag2O'	233	'-'	'16 h'	'growth inhibition CFU assay'	'IC50'	9	3.86266e-05	'E.coli'	'Bacteria'	-4.41311	'Negi et al. J Gen Appl Microbiol. 2013;59(1):83-8'
'Al2O3'	102	'55'	'30 min'	'Cell viability assay CFU'	'LC50'	387.793	0.00380189	'E.coli'	'Bacteria'	-2.42	'Pathakoti et al. Journal of Photochemistry and Photobiology B: Biology 130 (2014) 234–240'
'Bi2O3'	466	'15-90'	'2 h'	'Cell viability assay CFU'	'EC50'	705.32	0.00151356	'E.coli'	'Bacteria'	-2.82	'Puzyn et al. Nature Nanotech 6, 175–178 (2011)'
'CeO2'	172	'25'	'2 h'	'Cell Viability CFU assay'	'ec50'	64.05	0.000372384	'E Coli'	'Bacteria'	-3.42901	'Kar et al. Chemosphere 264 (2021) 128428'
'Co2O3'	166	'<100'	'2 h'	'Cell Viability CFU assay'	'ec50'	77.145	0.000464729	'E Coli'	'Bacteria'	-3.3328	'Kar et al. Chemosphere 264 (2021) 128428'
'CoO'	75	'15-90'	'2 h'	'Cell viability assay CFU'	'EC50'	23.1772	0.00030903	'E.coli'	'Bacteria'	-3.51	'Puzyn et al. Nature Nanotech 6, 175–178 (2011)'
'CuO'	79.545	'30'	'2 h'	'luminescence inhbition'	'ec50'	6.73	8.46062e-05	'E. coli JI130'	'Bacteria'	-4.0726	'Ivansk et al Anal Bioanal Chem (2010) 398:701–716'
'CuO'	79.545	'30'	'2 h'	'luminescence inhbition'	'ec50'	7.45	9.36577e-05	'E. coli JI131'	'Bacteria'	-4.02846	'Ivansk et al Anal Bioanal Chem (2010) 398:701–716'
'CuO'	80	'30-40'	'2 h'	'Cytotoxicity assay'	'LD50'	64.5	0.00080625	'E.coli'	'Bacteria'	-3.09353	'Hu et al. Sci. Total Environ. 407 (2009) 3070–3072'
'Er2O3'	382.5	'40-50'	'2 h'	'Cell Viability CFU assay'	'ec50'	0.033	8.62745e-08	'E Coli'	'Bacteria'	-7.06412	'Kar et al. Chemosphere 264 (2021) 128428'
'Fe2O3'	160	'68'	'30 min'	'Cell viability assay CFU'	'LC50'	636.971	0.00398107	'E.coli'	'Bacteria'	-2.4	'Pathakoti et al. Journal of Photochemistry and Photobiology B: Biology 130 (2014) 234–240'
'Fe3O4'	232	'10-100'	'2 h'	'Cell Viability CFU assay'	'ec50'	2000	0.00862069	'E Coli'	'Bacteria'	-2.06446	'Kar et al. Chemosphere 264 (2021) 128428'
'Gd2O3'	362	'<100'	'2 h'	'Cell Viability CFU assay'	'ec50'	1212	0.00334807	'E Coli'	'Bacteria'	-2.47521	'Kar et al. Chemosphere 264 (2021) 128428'
'NiO'	75	'30'	'1.5 h'	'bioluminescence activity assay'	'EC50'	198.02	0.00264027	'E.coli'	'Bacteria'	-2.57835	'Ko et al. Appl Microbiol Biotechnol (2014) 98:3295–3303'
'Sb2O3'	292	'15-90'	'2 h'	'Cell viability assay CFU'	'EC50'	668.933	0.00229087	'E.coli'	'Bacteria'	-2.64	'Puzyn et al. Nature Nanotech 6, 175–178 (2011)'
'SiO2'	60	'15-90'	'2 h'	'Cell viability assay CFU'	'EC50'	378.574	0.00630957	'E.coli'	'Bacteria'	-2.2	'Puzyn et al. Nature Nanotech 6, 175–178 (2011)'
'V2O3'	150	'-'	'30 min'	'Cell viability assay CFU'	'LC50'	49.6697	0.000331131	'E.coli'	'Bacteria'	-3.48	'Pathakoti et al. Journal of Photochemistry and Photobiology B: Biology 130 (2014) 234–240'
'Y2O3'	226	'38'	'30 min'	'Cell viability assay CFU'	'LC50'	0.366529	1.62181e-06	'E.coli'	'Bacteria'	-5.79	'Pathakoti et al. Journal of Photochemistry and Photobiology B: Biology 130 (2014) 234–240'
'ZnO'	81	'25-70'	'30 min'	'luminescence inhbition'	'ec50'	183	0.00225926	'E. coli AB1157'	'Bacteria'	-2.64603	'Ivansk et al Anal Bioanal Chem (2010) 398:701–716'
'ZnO'	81	'25-70'	'30 min'	'luminescence inhbition'	'ec50'	13.4	0.000165432	'E. coli AS391'	'Bacteria'	-3.78138	'Ivansk et al Anal Bioanal Chem (2010) 398:701–716'
'ZnO'	81	'25-70'	'30 min'	'luminescence inhbition'	'ec50'	234	0.00288889	'E. coli JI130'	'Bacteria'	-2.53927	'Ivansk et al Anal Bioanal Chem (2010) 398:701–716'
'ZnO'	81	'25-70'	'2 h'	'luminescence inhbition'	'ec50'	82.4	0.00101728	'E. coli JI131'	'Bacteria'	-2.99256	'Ivansk et al Anal Bioanal Chem (2010) 398:701–716'
'ZnO'	81	'25-70'	'2 h'	'luminescence inhbition'	'ec50'	6.91	8.53086e-05	'E. coli JI132'	'Bacteria'	-4.06901	'Ivansk et al Anal Bioanal Chem (2010) 398:701–716'
'ZnO'	81	'25-70'	'30 min'	'luminescence inhbition'	'ec50'	22.6	0.000279012	'E. coli JI132'	'Bacteria'	-3.55438	'Ivansk et al Anal Bioanal Chem (2010) 398:701–716'

## Sheet: Danio rerio
Danio rerio - Fold 1
NP	Molar weight (g/mol)	Size	Exposure time	Assay	Endpoint	Value (mg/l	Value(mol/L)	Cell type	Cell group	Log(endpoint)	reference
'Ag'	108	'3'	'120 h'	'Acute toxicity (mortality)'	'LC50'	10.0775	9.331e-05	'Danio rerio (embryos)'	'Fish'	-4.03007	'Bar-Ilan et al. Small 2009; 5 (16) 1897-1910'
'Ag'	108	'100'	'120 h'	'Acute toxicity (mortality)'	'LC50'	14.8241	0.00013726	'Danio rerio (embryos)'	'Fish'	-3.86246	'Bar-Ilan et al. Small 2009; 5 (16) 1897-1910'
'Bi2O3'	466	'<100'	'48 h'	'Acute toxicity assay'	'LC50'	1600	0.00343348	'Danio rerio (adults)'	'Fish'	-2.46427	'Kovrižnychet al. Interdisciplinary Toxicology. 2013; Vol. 6(2): 67–73'
'Cr2O3'	152	'<undefined>'	'48 h'	'Acute toxicity assay'	'LC50'	1600	0.0105263	'Danio rerio (eggs)'	'Fish'	-1.97772	'Kovrižnychet al. Interdisciplinary Toxicology. 2013; Vol. 6(2): 67–73'
'Cu'	64	'26.7'	'48 h'	'static renewal assay'	'LC50'	0.94	1.46875e-05	'Danio rerio (adults)'	'Fish'	-4.83305	'Griffit et al. Environm. Toxicol. Chem. 2008; 27 (9) 1972–1978'
'Cu'	64	'<100'	'48 h'	'Acute toxicity assay'	'LC50'	24	0.000375	'Danio rerio (eggs)'	'Fish'	-3.42597	'Kovrižnychet al. Interdisciplinary Toxicology. 2013; Vol. 6(2): 67–73'
'CuO'	79.545	'<50'	'48 h'	'Acute toxicity assay'	'LC50'	12.5	0.000157144	'Danio rerio (adults)'	'Fish'	-3.8037	'Kovrižnychet al. Interdisciplinary Toxicology. 2013; Vol. 6(2): 67–73'
'Sn'	119	'<150'	'48 h'	'Acute toxicity assay'	'LC50'	800	0.00672269	'Danio rerio (adults)'	'Fish'	-2.17246	'Kovrižnychet al. Interdisciplinary Toxicology. 2013; Vol. 6(2): 67–73'
'SnO2'	151	'<100'	'48 h'	'Acute toxicity assay'	'LC50'	1600	0.010596	'Danio rerio (adults)'	'Fish'	-1.97486	'Kovrižnychet al. Interdisciplinary Toxicology. 2013; Vol. 6(2): 67–73'
'WO3'	232	'<100'	'48 h'	'Acute toxicity assay'	'LC50'	1600	0.00689655	'Danio rerio (eggs)'	'Fish'	-2.16137	'Kovrižnychet al. Interdisciplinary Toxicology. 2013; Vol. 6(2): 67–73'
'ZnO'	81	'20'	'96 h'	'embryo-larval bioassay'	'LC50'	1.78401	2.20249e-05	'Danio rerio (embryos)'	'Fish'	-4.65709	'Zhu et al., J. Environ. Sci. Health A Tox. Hazard Subst. Environ. Eng. 2008; 43 (3) 278-284'
'ZnO'	81	'20'	'84 h'	'embryo-larval bioassay'	'eC50'	2.05465	2.53661e-05	'Danio rerio (embryos)'	'Fish'	-4.59575	'Zhu et al., J. Environ. Sci. Health A Tox. Hazard Subst. Environ. Eng. 2008; 43 (3) 278-285'
	Danio rerio - Fold 2
NP	Molar weight (g/mol)	Size	Exposure time	Assay	Endpoint	Value (mg/l	Value(mol/L)	Cell type	Cell group	Log(endpoint)	reference
'Ag'	108	'26.6'	'48 h'	'static renewal assay'	'LC50'	7.07	6.5463e-05	'Danio rerio (adults)'	'Fish'	-4.184	'Griffit et al. Environm. Toxicol. Chem. 2008; 27 (9) 1972–1978'
'Ag'	108	'40'	'120 h'	'Fish embryo survival'	'LC50'	3.94	3.64815e-05	'Danio rerio embryos'	'Fish'	-4.43793	'Lacave et al. Nanotechnology 27 (2016) 325102'
'Al2O3'	102	'80'	'84 h'	'embryo-larval bioassay'	'eC50'	1000	0.00980392	'Danio rerio (embryos)'	'Fish'	-2.0086	'Zhu et al., J. Environ. Sci. Health A Tox. Hazard Subst. Environ. Eng. 2008; 43 (3) 278-287'
'CaO'	56	'<160'	'48 h'	'Acute toxicity assay'	'LC50'	260	0.00464286	'Danio rerio (adults)'	'Fish'	-2.33321	'Kovrižnychet al. Interdisciplinary Toxicology. 2013; Vol. 6(2): 67–73'
'Cu'	64	'<100'	'48 h'	'Acute toxicity assay'	'LC50'	4.2	6.5625e-05	'Danio rerio (adults)'	'Fish'	-4.18293	'Kovrižnychet al. Interdisciplinary Toxicology. 2013; Vol. 6(2): 67–73'
'CuO'	79.545	'<50'	'48 h'	'Acute toxicity assay'	'LC50'	960	0.0120686	'Danio rerio (eggs)'	'Fish'	-1.91834	'Kovrižnychet al. Interdisciplinary Toxicology. 2013; Vol. 6(2): 67–73'
'SiO2'	60	'30'	'120 h'	'Fish embryo survival'	'LC50'	NaN	NaN	'Danio rerio embryos'	'Fish'	NaN	'Lacave et al. Nanotechnology 27 (2016) 325102'
'SnO2'	151	'<100'	'48 h'	'Acute toxicity assay'	'LC50'	1600	0.010596	'Danio rerio (eggs)'	'Fish'	-1.97486	'Kovrižnychet al. Interdisciplinary Toxicology. 2013; Vol. 6(2): 67–73'
'TiO2'	80	'<100'	'48 h'	'Acute toxicity assay'	'LC50'	1600	0.02	'Danio rerio (adults)'	'Fish'	-1.69897	'Kovrižnychet al. Interdisciplinary Toxicology. 2013; Vol. 6(2): 67–73'
'W'	184	'<150'	'48 h'	'Acute toxicity assay'	'LC50'	1600	0.00869565	'Danio rerio (adults)'	'Fish'	-2.0607	'Kovrižnychet al. Interdisciplinary Toxicology. 2013; Vol. 6(2): 67–73'
'ZnO'	81	'8.35'	'5 days'	'embryonic zebrafish bioassayA'	'LC50'	9.1	0.000112346	'Danio rerio (embryos)'	'Fish'	-3.94944	'Wehmas et al. Toxicology Reports 2 (2015) 702–717'
'ZnO'	81	'8.35'	'4 days'	'larval zebrafish bioassay'	'LC50'	3.5	4.32099e-05	'Danio rerio (embryos)'	'Fish'	-4.36442	'Wehmas et al. Toxicology Reports 2 (2015) 702–717'
'ZnO'	81	'<180'	'120 h'	'Fish embryo survival'	'LC50'	5.538	6.83704e-05	'Danio rerio embryos'	'Fish'	-4.16513	'Lacave et al. Nanotechnology 27 (2016) 325102'
	Danio rerio - Fold 3
NP	Molar weight (g/mol)	Size	Exposure time	Assay	Endpoint	Value (mg/l	Value(mol/L)	Cell type	Cell group	Log(endpoint)	reference
'Ag'	108	'<undefined>'	'48 h'	'Acute toxicity assay'	'LC50'	2.9	2.68519e-05	'Danio rerio (adults)'	'Fish'	-4.57103	'Kovrižnychet al. Interdisciplinary Toxicology. 2013; Vol. 6(2): 67–73'
'Au'	197	'5'	'120 h'	'Fish embryo survival'	'LC50'	24.655	0.000125152	'Danio rerio embryos'	'Fish'	-3.90256	'Lacave et al. Nanotechnology 27 (2016) 325102'
'Au'	197	'15'	'120 h'	'Fish embryo survival'	'LC50'	24.61	0.000124924	'Danio rerio embryos'	'Fish'	-3.90335	'Lacave et al. Nanotechnology 27 (2016) 325102'
'CaO'	56	'<160'	'48 h'	'Acute toxicity assay'	'LC50'	290	0.00517857	'Danio rerio (eggs)'	'Fish'	-2.28579	'Kovrižnychet al. Interdisciplinary Toxicology. 2013; Vol. 6(2): 67–73'
'Cr2O3'	152	'<undefined>'	'48 h'	'Acute toxicity assay'	'LC50'	1600	0.0105263	'Danio rerio (adults)'	'Fish'	-1.97772	'Kovrižnychet al. Interdisciplinary Toxicology. 2013; Vol. 6(2): 67–73'
'Cu'	64	'26.7'	'48 h'	'static renewal assay'	'LC50'	0.71	1.10938e-05	'Danio rerio (juvenile)'	'Fish'	-4.95492	'Griffit et al. Environm. Toxicol. Chem. 2008; 27 (9) 1972–1978'
'Fe2O3'	160	'<50'	'48 h'	'Acute toxicity assay'	'LC50'	1600	0.01	'Danio rerio (adults)'	'Fish'	-2	'Kovrižnychet al. Interdisciplinary Toxicology. 2013; Vol. 6(2): 67–73'
'SiO2'	60	'<undefined>'	'48 h'	'Acute toxicity assay'	'LC50'	1600	0.0266667	'Danio rerio (adults)'	'Fish'	-1.57403	'Kovrižnychet al. Interdisciplinary Toxicology. 2013; Vol. 6(2): 67–73'
'SiO2'	60	'70'	'120 h'	'Fish embryo survival'	'LC50'	83.33	0.00138883	'Danio rerio embryos'	'Fish'	-2.85735	'Lacave et al. Nanotechnology 27 (2016) 325102'
'SiO2'	60	'15'	'120 h'	'Fish embryo survival'	'LC50'	NaN	NaN	'Danio rerio embryos'	'Fish'	NaN	'Lacave et al. Nanotechnology 27 (2016) 325102'
'Sn'	119	'<150'	'48 h'	'Acute toxicity assay'	'LC50'	800	0.00672269	'Danio rerio (eggs)'	'Fish'	-2.17246	'Kovrižnychet al. Interdisciplinary Toxicology. 2013; Vol. 6(2): 67–73'
'TiO2'	80	'<100'	'48 h'	'Acute toxicity assay'	'LC50'	1600	0.02	'Danio rerio (eggs)'	'Fish'	-1.69897	'Kovrižnychet al. Interdisciplinary Toxicology. 2013; Vol. 6(2): 67–73'
'ZnO'	81	'<130'	'120 h'	'Fish embryo survival'	'LC50'	4.289	5.29506e-05	'Danio rerio embryos'	'Fish'	-4.27613	'Lacave et al. Nanotechnology 27 (2016) 325102'
Danio rerio - Fold 4
NP	Molar weight (g/mol)	Size	Exposure time	Assay	Endpoint	Value (mg/l	Value(mol/L)	Cell type	Cell group	Log(endpoint)	reference
'Ag'	108	'<undefined>'	'48 h'	'Acute toxicity assay'	'LC50'	2.7	2.5e-05	'Danio rerio (eggs)'	'Fish'	-4.60206	'Kovrižnychet al. Interdisciplinary Toxicology. 2013; Vol. 6(2): 67–73'
'Ag'	108	'10'	'120 h'	'Acute toxicity (mortality)'	'LC50'	13.5713	0.00012566	'Danio rerio (embryos)'	'Fish'	-3.9008	'Bar-Ilan et al. Small 2009; 5 (16) 1897-1910'
'Ag'	108	'26.6'	'48 h'	'static renewal assay'	'LC50'	7.2	6.66667e-05	'Danio rerio (juvenile)'	'Fish'	-4.17609	'Griffit et al. Environm. Toxicol. Chem. 2008; 27 (9) 1972–1978'
'Ag'	108	'20'	'120 h'	'Fish embryo survival'	'LC50'	0.529	4.89815e-06	'Danio rerio embryos'	'Fish'	-5.30997	'Lacave et al. Nanotechnology 27 (2016) 325102'
'Al2O3'	102	'<50'	'48 h'	'Acute toxicity assay'	'LC50'	800	0.00784314	'Danio rerio (adults)'	'Fish'	-2.10551	'Kovrižnychet al. Interdisciplinary Toxicology. 2013; Vol. 6(2): 67–73'
'Al2O3'	102	'<50'	'48 h'	'Acute toxicity assay'	'LC50'	800	0.00784314	'Danio rerio (eggs)'	'Fish'	-2.10551	'Kovrižnychet al. Interdisciplinary Toxicology. 2013; Vol. 6(2): 67–73'
'Bi2O3'	466	'<100'	'48 h'	'Acute toxicity assay'	'LC50'	1600	0.00343348	'Danio rerio (eggs)'	'Fish'	-2.46427	'Kovrižnychet al. Interdisciplinary Toxicology. 2013; Vol. 6(2): 67–73'
'CuO'	79.545	'24.5'	'96 h'	'Lethal malformations'	'ec50'	1.6	2.01144e-05	'zebrafish (danio rerio)'	'Fish'	-4.69649	'Bondarenko et al. Nanotoxicology, 2016; 10(9): 1229–1242'
'MgO'	40	'<50'	'48 h'	'Acute toxicity assay'	'LC50'	3200	0.08	'Danio rerio (eggs)'	'Fish'	-1.09691	'Kovrižnychet al. Interdisciplinary Toxicology. 2013; Vol. 6(2): 67–73'
'NiO'	75	'<undefined>'	'48 h'	'Acute toxicity assay'	'LC50'	800	0.0106667	'Danio rerio (eggs)'	'Fish'	-1.97197	'Kovrižnychet al. Interdisciplinary Toxicology. 2013; Vol. 6(2): 67–73'
'TiO2'	80	'<20'	'84 h'	'embryo-larval bioassay'	'eC50'	500	0.00625	'Danio rerio (embryos)'	'Fish'	-2.20412	'Zhu et al., J. Environ. Sci. Health A Tox. Hazard Subst. Environ. Eng. 2008; 43 (3) 278-289'
'TiO2'	80	'5'	'96 h'	'Lethal malformations'	'ec50'	NaN	NaN	'zebrafish (danio rerio)'	'Fish'	NaN	'Bondarenko et al. Nanotoxicology, 2016; 10(9): 1229–1242'
Danio rerio - Fold 5
NP	Molar weight (g/mol)	Size	Exposure time	Assay	Endpoint	Value (mg/l	Value(mol/L)	Cell type	Cell group	Log(endpoint)	reference
'Ag'	108	'50'	'120 h'	'Acute toxicity (mortality)'	'LC50'	13.7117	0.00012696	'Danio rerio (embryos)'	'Fish'	-3.89633	'Bar-Ilan et al. Small 2009; 5 (16) 1897-1910'
'Ag'	108	'100'	'120 h'	'Fish embryo survival'	'LC50'	1.973	1.82685e-05	'Danio rerio embryos'	'Fish'	-4.7383	'Lacave et al. Nanotechnology 27 (2016) 325102'
'Ag'	108	'20.4'	'96 h'	'Lethal malformations'	'ec50'	3	2.77778e-05	'zebrafish (danio rerio)'	'Fish'	-4.5563	'Bondarenko et al. Nanotoxicology, 2016; 10(9): 1229–1242'
'Al2O3'	102	'80'	'96 h'	'embryo-larval bioassay'	'LC50'	1000	0.00980392	'Danio rerio (embryos)'	'Fish'	-2.0086	'Zhu et al., J. Environ. Sci. Health A Tox. Hazard Subst. Environ. Eng. 2008; 43 (3) 278-286'
'Au'	197	'40'	'120 h'	'Fish embryo survival'	'LC50'	34.717	0.000176228	'Danio rerio embryos'	'Fish'	-3.75392	'Lacave et al. Nanotechnology 27 (2016) 325102'
'Fe2O3'	160	'<50'	'48 h'	'Acute toxicity assay'	'LC50'	1600	0.01	'Danio rerio (eggs)'	'Fish'	-2	'Kovrižnychet al. Interdisciplinary Toxicology. 2013; Vol. 6(2): 67–73'
'MgO'	40	'<50'	'48 h'	'Acute toxicity assay'	'LC50'	140	0.0035	'Danio rerio (adults)'	'Fish'	-2.45593	'Kovrižnychet al. Interdisciplinary Toxicology. 2013; Vol. 6(2): 67–73'
'NiO'	75	'<undefined>'	'48 h'	'Acute toxicity assay'	'LC50'	200	0.00266667	'Danio rerio (adults)'	'Fish'	-2.57403	'Kovrižnychet al. Interdisciplinary Toxicology. 2013; Vol. 6(2): 67–73'
'SiO2'	60	'<undefined>'	'48 h'	'Acute toxicity assay'	'LC50'	1600	0.0266667	'Danio rerio (eggs)'	'Fish'	-1.57403	'Kovrižnychet al. Interdisciplinary Toxicology. 2013; Vol. 6(2): 67–73'
'TiO2'	80	'<20'	'96 h'	'embryo-larval bioassay'	'LC50'	500	0.00625	'Danio rerio (embryos)'	'Fish'	-2.20412	'Zhu et al., J. Environ. Sci. Health A Tox. Hazard Subst. Environ. Eng. 2008; 43 (3) 278-288'
'W'	184	'<150'	'48 h'	'Acute toxicity assay'	'LC50'	1600	0.00869565	'Danio rerio (eggs)'	'Fish'	-2.0607	'Kovrižnychet al. Interdisciplinary Toxicology. 2013; Vol. 6(2): 67–73'
'WO3'	232	'<100'	'48 h'	'Acute toxicity assay'	'LC50'	1600	0.00689655	'Danio rerio (adults)'	'Fish'	-2.16137	'Kovrižnychet al. Interdisciplinary Toxicology. 2013; Vol. 6(2): 67–73'

## Sheet: BEAS 2B
BEAS-2B - Fold 1
NP	Molar weight (g/mol)	Size	Exposure time	Assay	Endpoint	Value (mg/l	Value(mol/L)	Cell type	Cell group	Log(endpoint)	reference
'Co3O4'	241	10	'24 h'	'ATP assay'	'EC50'	23.4423	9.72709e-05	'BEAS-2B cells, ATP assay'	'Human cells'	-4.01202	'Zhang et al. ACS Nano 2012, 6, 5, 4349–4368'
'CoO'	75	50	'24 h'	'Cell viability'	'EC50'	12.5	0.000166667	'BEAS-2B'	'Human cells'	-3.77815	'Huang et al. Materials 2010, 3, 4842-4859;'
'Cr2O3'	152	193	'24 h'	'MTS assay'	'EC50'	338.844	0.00222924	'BEAS-2B cells, MTS assay'	'Human cells'	-2.65184	'Zhang et al. ACS Nano 2012, 6, 5, 4349–4368'
'SiO2'	60	13.5	'24 h'	'MTS assay'	'EC50'	2.75423e+07	459.038	'BEAS-2B cells, MTS assay'	'Human cells'	2.66185	'Zhang et al. ACS Nano 2012, 6, 5, 4349–4368'
'TiO2'	80	NaN	'24 h'	'Cell viability'	'EC50'	NaN	NaN	'BEAS-2B'	'Human cells'	NaN	'Huang et al. Materials 2010, 3, 4842-4859;'
'Y2O3'	226	32.7	'24 h'	'MTS assay'	'EC50'	2630267991895390	1.16384e+10	'BEAS-2B cells, MTS assay'	'Human cells'	10.0659	'Zhang et al. ACS Nano 2012, 6, 5, 4349–4368'
'ZnO'	81	20	'24 h'	'Cell viability'	'EC50'	12.5	0.000154321	'BEAS-2B'	'Human cells'	-3.81158	'Huang et al. Materials 2010, 3, 4842-4859;'
BEAS-2B - Fold 2
NP	Molar weight (g/mol)	Size	Exposure time	Assay	Endpoint	Value (mg/l	Value(mol/L)	Cell type	Cell group	Log(endpoint)	reference
'Al2O3'	102	14.7	'24 h'	'ATP assay'	'EC50'	NaN	NaN	'BEAS-2B cells, ATP assay'	'Human cells'	NaN	'Zhang et al. ACS Nano 2012, 6, 5, 4349–4368'
'CoO'	75	71.8	'24 h'	'ATP assay'	'EC50'	43.6516	0.000582021	'BEAS-2B cells, ATP assay'	'Human cells'	-3.23506	'Zhang et al. ACS Nano 2012, 6, 5, 4349–4368'
'Cr2O3'	152	193	'24 h'	'ATP assay'	'EC50'	35.4813	0.00023343	'BEAS-2B cells, ATP assay'	'Human cells'	-3.63184	'Zhang et al. ACS Nano 2012, 6, 5, 4349–4368'
'La2O3'	326	24.6	'24 h'	'ATP assay'	'EC50'	1.8197e+19	55819044742638	'BEAS-2B cells, ATP assay'	'Human cells'	13.7468	'Zhang et al. ACS Nano 2012, 6, 5, 4349–4368'
'Ni2O3'	165	140.6	'24 h'	'MTS assay'	'EC50'	331.131	0.00200686	'BEAS-2B cells, MTS assay'	'Human cells'	-2.69748	'Zhang et al. ACS Nano 2012, 6, 5, 4349–4368'
'ZnO'	81	22.6	'24 h'	'MTS assay'	'EC50'	5.24807	6.4791e-05	'BEAS-2B cells, MTS assay'	'Human cells'	-4.18849	'Zhang et al. ACS Nano 2012, 6, 5, 4349–4368'
'SnO2'	151	62.4	'24 h'	'MTS assay'	'EC50'	NaN	NaN	'BEAS-2B cells, MTS assay'	'Human cells'	NaN	'Zhang et al. ACS Nano 2012, 6, 5, 4349–4368'
'Fe2O3'	160	12.3	'24 h'	'ATP assay'	'EC50'	NaN	NaN	'BEAS-2B cells, ATP assay'	'Human cells'	NaN	'Zhang et al. ACS Nano 2012, 6, 5, 4349–4368'
BEAS-2B - Fold 3
NP	Molar weight (g/mol)	Size	Exposure time	Assay	Endpoint	Value (mg/l	Value(mol/L)	Cell type	Cell group	Log(endpoint)	reference
'La2O3'	326	24.6	'24 h'	'MTS assay'	'EC50'	NaN	NaN	'BEAS-2B cells, MTS assay'	'Human cells'	NaN	'Zhang et al. ACS Nano 2012, 6, 5, 4349–4368'
'Mn2O3'	158	51.5	'24 h'	'ATP assay'	'EC50'	13.1826	8.3434e-05	'BEAS-2B cells, ATP assay'	'Human cells'	-4.07866	'Zhang et al. ACS Nano 2012, 6, 5, 4349–4368'
'Mn2O3'	158	51.5	'24 h'	'MTS assay'	'EC50'	11.2202	7.10138e-05	'BEAS-2B cells, MTS assay'	'Human cells'	-4.14866	'Zhang et al. ACS Nano 2012, 6, 5, 4349–4368'
'NiO'	75	NaN	'24 h'	'Cell viability'	'EC50'	25	0.000333333	'BEAS-2B'	'Human cells'	-3.47712	'Huang et al. Materials 2010, 3, 4842-4859;'
'NiO'	75	13.1	'24 h'	'MTS assay'	'EC50'	416869	5.55826	'BEAS-2B cells, MTS assay'	'Human cells'	0.744939	'Zhang et al. ACS Nano 2012, 6, 5, 4349–4368'
'ZnO'	81	22.6	'24 h'	'ATP assay'	'EC50'	3.63078	4.48245e-05	'BEAS-2B cells, ATP assay'	'Human cells'	-4.34849	'Zhang et al. ACS Nano 2012, 6, 5, 4349–4368'
'SnO2'	151	62.4	'24 h'	'ATP assay'	'EC50'	NaN	NaN	'BEAS-2B cells, ATP assay'	'Human cells'	NaN	'Zhang et al. ACS Nano 2012, 6, 5, 4349–4368'
'Fe2O3'	160	12.3	'24 h'	'MTS assay'	'EC50'	NaN	NaN	'BEAS-2B cells, MTS assay'	'Human cells'	NaN	'Zhang et al. ACS Nano 2012, 6, 5, 4349–4368'
BEAS-2B - Fold 4
NP	Molar weight (g/mol)	Size	Exposure time	Assay	Endpoint	Value (mg/l	Value(mol/L)	Cell type	Cell group	Log(endpoint)	reference
'CoO'	75	71.8	'24 h'	'MTS assay'	'EC50'	51.2861	0.000683815	'BEAS-2B cells, MTS assay'	'Human cells'	-3.16506	'Zhang et al. ACS Nano 2012, 6, 5, 4349–4368'
'CuO'	79.545	12.8	'24 h'	'ATP assay'	'EC50'	23.9883	0.000301569	'BEAS-2B cells, ATP assay'	'Human cells'	-3.52061	'Zhang et al. ACS Nano 2012, 6, 5, 4349–4368'
'CuO'	79.545	12.8	'24 h'	'MTS assay'	'EC50'	23.9883	0.000301569	'BEAS-2B cells, MTS assay'	'Human cells'	-3.52061	'Zhang et al. ACS Nano 2012, 6, 5, 4349–4368'
'Ni2O3'	165	140.6	'24 h'	'ATP assay'	'EC50'	63.0957	0.000382398	'BEAS-2B cells, ATP assay'	'Human cells'	-3.41748	'Zhang et al. ACS Nano 2012, 6, 5, 4349–4368'
'Sb2O3'	292	11.8	'24 h'	'MTS assay'	'EC50'	NaN	NaN	'BEAS-2B cells, MTS assay'	'Human cells'	NaN	'Zhang et al. ACS Nano 2012, 6, 5, 4349–4368'
'Y2O3'	226	32.7	'24 h'	'ATP assay'	'EC50'	NaN	NaN	'BEAS-2B cells, ATP assay'	'Human cells'	NaN	'Zhang et al. ACS Nano 2012, 6, 5, 4349–4368'
'ZrO2'	123	40.1	'24 h'	'MTS assay'	'EC50'	NaN	NaN	'BEAS-2B cells, MTS assay'	'Human cells'	NaN	'Zhang et al. ACS Nano 2012, 6, 5, 4349–4368'
'NiO'	75	13.1	'24 h'	'ATP assay'	'EC50'	NaN	NaN	'BEAS-2B cells, MTS assay'	'Human cells'	NaN	'Zhang et al. ACS Nano 2012, 6, 5, 4349–4368'
BEAS-2B - Fold 5
NP	Molar weight (g/mol)	Size	Exposure time	Assay	Endpoint	Value (mg/l	Value(mol/L)	Cell type	Cell group	Log(endpoint)	reference
'Al2O3'	102	14.7	'24 h'	'MTS assay'	'EC50'	NaN	NaN	'BEAS-2B cells, MTS assay'	'Human cells'	NaN	'Zhang et al. ACS Nano 2012, 6, 5, 4349–4368'
'CuO'	79.545	NaN	'24 h'	'Cell viability'	'EC50'	5	6.28575e-05	'BEAS-2B'	'Human cells'	-4.20164	'Huang et al. Materials 2010, 3, 4842-4859;'
'Mn2O3'	158	NaN	'24 h'	'Cell viability'	'EC50'	50	0.000316456	'BEAS-2B'	'Human cells'	-3.49969	'Huang et al. Materials 2010, 3, 4842-4859;'
'Sb2O3'	292	11.8	'24 h'	'ATP assay'	'EC50'	1.31826e+18	4.51458e+12	'BEAS-2B cells, ATP assay'	'Human cells'	12.6546	'Zhang et al. ACS Nano 2012, 6, 5, 4349–4368'
'SiO2'	60	13.5	'24 h'	'ATP assay'	'EC50'	200	0.00333333	'BEAS-2B cells, ATP assay'	'Human cells'	-2.47712	'Zhang et al. ACS Nano 2012, 6, 5, 4349–4368'
'TiO2'	80	12.6	'24 h'	'ATP assay'	'EC50'	NaN	NaN	'BEAS-2B cells, ATP assay'	'Human cells'	NaN	'Zhang et al. ACS Nano 2012, 6, 5, 4349–4368'
'TiO2'	80	12.6	'24 h'	'MTS assay'	'EC50'	NaN	NaN	'BEAS-2B cells, MTS assay'	'Human cells'	NaN	'Zhang et al. ACS Nano 2012, 6, 5, 4349–4368'
'ZrO2'	123	40.1	'24 h'	'ATP assay'	'EC50'	NaN	NaN	'BEAS-2B cells, ATP assay'	'Human cells'	NaN	'Zhang et al. ACS Nano 2012, 6, 5, 4349–4368'

## Sheet: Caco2
Caco-2 - Fold 1
NP	Molar weight (g/mol)	Size	Exposure time	Assay	Endpoint	Value (mg/l	Value(mol/L)	Cell type	Cell group	Log(endpoint)	reference
'Mn3o4'	229	'-'	'216'	'resazurin fluorescence assay'	'ec50'	28.9	0.000126201	'Caco2'	'Human cells'	-3.89894	'Titma et al. Cytotechnology. 2016;68(6):2363-2377'
'Sb2O3'	292	'-'	'60 h'	'resazurin fluorescence assay'	'ec50'	38	0.000130137	'Caco2'	'Human cells'	-3.8856	'Titma et al. Cytotechnology. 2016;68(6):2363-2377'
'Sb2O3'	292	'-'	'48 h'	'TEER assay'	'ec50'	10	3.42466e-05	'Caco2'	'Human cells'	-4.46538	'Titma et al. Cytotechnology. 2016;68(6):2363-2377'
'SiO2'	60	'12'	'24 h'	'NRU assay'	'IC50'	NaN	NaN	'Caco2'	'Human cells'	NaN	'Ivansk et al. Curr Top Med Chem., 2015;15(18):1914-29'
'TiO2'	80	'-'	'108'	'resazurin fluorescence assay'	'ec50'	NaN	NaN	'Caco2'	'Human cells'	NaN	'Titma et al. Cytotechnology. 2016;68(6):2363-2377'
'TiO2'	80	'-'	'12 h'	'resazurin fluorescence assay'	'ec50'	NaN	NaN	'Caco2'	'Human cells'	NaN	'Titma et al. Cytotechnology. 2016;68(6):2363-2377'
'ZnO'	81	'-'	'36 h'	'resazurin fluorescence assay'	'ec50'	65.9	0.00081358	'Caco2'	'Human cells'	-3.0896	'Titma et al. Cytotechnology. 2016;68(6):2363-2377'
Caco-2 - Fold 2
NP	Molar weight (g/mol)	Size	Exposure time	Assay	Endpoint	Value (mg/l	Value(mol/L)	Cell type	Cell group	Log(endpoint)	reference
'Co3O4'	241	'9.2'	'24 h'	'NRU assay'	'IC50'	123	0.000510373	'Caco2'	'Human cells'	-3.29211	'Ivansk et al. Curr Top Med Chem., 2015;15(18):1914-29'
'CuO'	79.545	'-'	'108'	'resazurin fluorescence assay'	'ec50'	31.5	0.000396002	'Caco2'	'Human cells'	-3.4023	'Titma et al. Cytotechnology. 2016;68(6):2363-2377'
'Sb2O3'	292	'-'	'216'	'resazurin fluorescence assay'	'ec50'	48.2	0.000165068	'Caco2'	'Human cells'	-3.78234	'Titma et al. Cytotechnology. 2016;68(6):2363-2377'
'Sb2O3'	292	'-'	'72'	'TEER assay'	'ec50'	10	3.42466e-05	'Caco2'	'Human cells'	-4.46538	'Titma et al. Cytotechnology. 2016;68(6):2363-2377'
'TiO2'	80	'-'	'36 h'	'resazurin fluorescence assay'	'ec50'	NaN	NaN	'Caco2'	'Human cells'	NaN	'Titma et al. Cytotechnology. 2016;68(6):2363-2377'
'TiO2'	80	'-'	'216'	'resazurin fluorescence assay'	'ec50'	NaN	NaN	'Caco2'	'Human cells'	NaN	'Titma et al. Cytotechnology. 2016;68(6):2363-2377'
'TiO2'	80	'-'	'60 h'	'resazurin fluorescence assay'	'ec50'	NaN	NaN	'Caco2'	'Human cells'	NaN	'Titma et al. Cytotechnology. 2016;68(6):2363-2377'
'ZnO'	81	'19.7'	'24 h'	'NRU assay'	'IC50'	30.2	0.00037284	'Caco2'	'Human cells'	-3.42848	'Ivansk et al. Curr Top Med Chem., 2015;15(18):1914-29'
Caco-2 - Fold 3
NP	Molar weight (g/mol)	Size	Exposure time	Assay	Endpoint	Value (mg/l	Value(mol/L)	Cell type	Cell group	Log(endpoint)	reference
'MgO'	40	'-'	'24 h'	'NRU assay'	'IC50'	NaN	NaN	'Caco2'	'Human cells'	NaN	'Ivansk et al. Curr Top Med Chem., 2015;15(18):1914-29'
'Mn3o4'	229	'-'	'108'	'resazurin fluorescence assay'	'ec50'	20.7	9.0393e-05	'Caco2'	'Human cells'	-4.04387	'Titma et al. Cytotechnology. 2016;68(6):2363-2377'
'Sb2O3'	292	'-'	'108'	'resazurin fluorescence assay'	'ec50'	47.4	0.000162329	'Caco2'	'Human cells'	-3.7896	'Titma et al. Cytotechnology. 2016;68(6):2363-2377'
'Sb2O3'	292	'-'	'36 h'	'resazurin fluorescence assay'	'ec50'	66.8	0.000228767	'Caco2'	'Human cells'	-3.64061	'Titma et al. Cytotechnology. 2016;68(6):2363-2377'
'TiO2'	80	'-'	'12 h'	'resazurin fluorescence assay'	'ec50'	NaN	NaN	'Caco2'	'Human cells'	NaN	'Titma et al. Cytotechnology. 2016;68(6):2363-2377'
'TiO2'	80	'-'	'36 h'	'resazurin fluorescence assay'	'ec50'	NaN	NaN	'Caco2'	'Human cells'	NaN	'Titma et al. Cytotechnology. 2016;68(6):2363-2377'
'ZnO'	81	'-'	'60 h'	'resazurin fluorescence assay'	'ec50'	52.4	0.000646914	'Caco2'	'Human cells'	-3.18915	'Titma et al. Cytotechnology. 2016;68(6):2363-2377'
'ZnO'	81	'-'	'216'	'resazurin fluorescence assay'	'ec50'	61.2	0.000755556	'Caco2'	'Human cells'	-3.12173	'Titma et al. Cytotechnology. 2016;68(6):2363-2377'
Caco-2 - Fold 4
NP	Molar weight (g/mol)	Size	Exposure time	Assay	Endpoint	Value (mg/l	Value(mol/L)	Cell type	Cell group	Log(endpoint)	reference
'CuO'	79.545	'-'	'60 h'	'resazurin fluorescence assay'	'ec50'	30.3	0.000380916	'Caco2'	'Human cells'	-3.41917	'Titma et al. Cytotechnology. 2016;68(6):2363-2377'
'CuO'	79.545	'-'	'36 h'	'resazurin fluorescence assay'	'ec50'	38.6	0.00048526	'Caco2'	'Human cells'	-3.31403	'Titma et al. Cytotechnology. 2016;68(6):2363-2377'
'CuO'	79.545	'-'	'24 h'	'resazurin fluorescence assay'	'ec50'	117.2	0.00147338	'Caco2'	'Human cells'	-2.83169	'Titma et al. Cytotechnology. 2016;68(6):2363-2377'
'Mn3O4'	229	'14.9'	'24 h'	'NRU assay'	'IC50'	66.7	0.000291266	'Caco2'	'Human cells'	-3.53571	'Ivansk et al. Curr Top Med Chem., 2015;15(18):1914-29'
'Sb2O3'	292	'20.8'	'24 h'	'NRU assay'	'IC50'	57.2	0.00019589	'Caco2'	'Human cells'	-3.70799	'Ivansk et al. Curr Top Med Chem., 2015;15(18):1914-29'
'Sb2O3'	292	'-'	'24 h'	'TEER assay'	'ec50'	10	3.42466e-05	'Caco2'	'Human cells'	-4.46538	'Titma et al. Cytotechnology. 2016;68(6):2363-2377'
'TiO2'	80	'-'	'60 h'	'resazurin fluorescence assay'	'ec50'	NaN	NaN	'Caco2'	'Human cells'	NaN	'Titma et al. Cytotechnology. 2016;68(6):2363-2377'
'TiO2'	80	'-'	'216'	'resazurin fluorescence assay'	'ec50'	NaN	NaN	'Caco2'	'Human cells'	NaN	'Titma et al. Cytotechnology. 2016;68(6):2363-2377'
Caco-2 - Fold 5
NP	Molar weight (g/mol)	Size	Exposure time	Assay	Endpoint	Value (mg/l	Value(mol/L)	Cell type	Cell group	Log(endpoint)	reference
'CuO'	79.545	'11.9'	'24 h'	'NRU assay'	'IC50'	12.6	0.000158401	'Caco2'	'Human cells'	-3.80024	'Ivansk et al. Curr Top Med Chem., 2015;15(18):1914-29'
'CuO'	79.545	'-'	'216'	'resazurin fluorescence assay'	'ec50'	37	0.000465146	'Caco2'	'Human cells'	-3.33241	'Titma et al. Cytotechnology. 2016;68(6):2363-2377'
'Mn3o4'	229	'-'	'60 h'	'resazurin fluorescence assay'	'ec50'	33.2	0.000144978	'Caco2'	'Human cells'	-3.8387	'Titma et al. Cytotechnology. 2016;68(6):2363-2377'
'TiO2'	80	'14.2'	'24 h'	'NRU assay'	'IC50'	NaN	NaN	'Caco2'	'Human cells'	NaN	'Ivansk et al. Curr Top Med Chem., 2015;15(18):1914-29'
'TiO2'	80	'-'	'24 h'	'resazurin fluorescence assay'	'ec50'	NaN	NaN	'Caco2'	'Human cells'	NaN	'Titma et al. Cytotechnology. 2016;68(6):2363-2377'
'TiO2'	80	'-'	'24 h'	'resazurin fluorescence assay'	'ec50'	NaN	NaN	'Caco2'	'Human cells'	NaN	'Titma et al. Cytotechnology. 2016;68(6):2363-2377'
'TiO2'	80	'-'	'108'	'resazurin fluorescence assay'	'ec50'	NaN	NaN	'Caco2'	'Human cells'	NaN	'Titma et al. Cytotechnology. 2016;68(6):2363-2377'
'ZnO'	81	'-'	'108'	'resazurin fluorescence assay'	'ec50'	62.5	0.000771605	'Caco2'	'Human cells'	-3.11261	'Titma et al. Cytotechnology. 2016;68(6):2363-2377'

## Sheet: Daphnia Magna
Daphnia Magna - Fold 1
NP	Molar weight (g/mol)	Size	Exposure time	Assay	Endpoint	Value (mg/l	Value(mol/L)	Cell type	Cell group	Log(endpoint)	reference
'Ag'	108	20	'48 h'	'Mortality test assay'	'LC50'	0.008	7.40741e-08	'Daphnia magna'	'Crustacean'	-7.13033	'Hoheisel et al. 2012, Environ. Toxicol. Chem. 31: 2557–2563'
'Ag'	108	50	'48 h'	'Mortality test assay'	'LC50'	0.024	2.22222e-07	'Daphnia magna'	'Crustacean'	-6.65321	'Hoheisel et al. 2012, Environ. Toxicol. Chem. 31: 2557–2563'
'Ag'	108	50	'48 h'	'Mortality test assay'	'LC50'	0.03	2.77778e-07	'Daphnia magna'	'Crustacean'	-6.5563	'Hoheisel et al. 2012, Environ. Toxicol. Chem. 31: 2557–2563'
'CuO'	79.545	NaN	'48 h'	'Immobilization'	'EC50'	5.903	7.42096e-05	'Daphnia magna'	'Crustacean'	-4.12954	'Sovova et al., 2009, Proceedings,NANOCON Conference, Roznov , Czech Republic, pp 62‐71,'
'TiO2'	80	NaN	'48 h'	'Immobilization'	'EC50'	300	0.00375	'Daphnia magna'	'Crustacean'	-2.42597	'Sovova et al., 2009, Proceedings,NANOCON Conference, Roznov , Czech Republic, pp 62‐71,'
'TiO2'	80	21	'72 h'	'Acute toxicity (mortality)'	'EC50'	1.62	2.025e-05	'Daphnia magna (neonates)'	'Crustacean'	-4.69357	'Zhu et al. Chemosphere 2010; 78 (3) 209-216'
'ZnO'	81	70	'48 h'	'acute immobilisation assay (Daphtoxkit)'	'EC50'	9	0.000111111	'daphnia magna'	'Crustacean'	-3.95424	'Blinova et al. / Environmental Pollution 158 (2010) 41–4744'
'ZnO'	81	70	'48 h'	'acute immobilisation assay (Daphtoxkit)'	'EC50'	2.8	3.45679e-05	'daphnia magna'	'Crustacean'	-4.46133	'Blinova et al. / Environmental Pollution 158 (2010) 41–4744'
Daphnia Magna - Fold 2
NP	Molar weight (g/mol)	Size	Exposure time	Assay	Endpoint	Value (mg/l	Value(mol/L)	Cell type	Cell group	Log(endpoint)	reference
'Ag'	108	20.4	'48 h'	'Immobilization'	'ec50'	0.003	2.77778e-08	'Daphnia magna'	'Crustacean'	-7.5563	'Bondarenko et al. Nanotoxicology, 2016; 10(9): 1229–1242'
'CuO'	79.545	30	'48 h'	'acute immobilisation assay (Daphtoxkit)'	'EC50'	149	0.00187315	'daphnia magna'	'Crustacean'	-2.72743	'Blinova et al. / Environmental Pollution 158 (2010) 41–4744'
'CuO'	79.545	24.5	'48 h'	'Immobilization'	'ec50'	0.9	1.13144e-05	'Daphnia magna'	'Crustacean'	-4.94637	'Bondarenko et al. Nanotoxicology, 2016; 10(9): 1229–1242'
'CuO'	80	30	'48 h'	'Mortality test assay'	'LC50'	3.2	4e-05	'Daphnia magna (neonates)'	'Crustacean'	-4.39794	'Heinlaan et al. Chemosphere 2008; 71 (7) 1308-1316'
'TiO2'	80	21	'72 h'	'Acute toxicity (immobilization)'	'LC50'	2.02	2.525e-05	'Daphnia magna (neonates)'	'Crustacean'	-4.59774	'Zhu et al. Chemosphere 2010; 78 (3) 209-216'
'TiO2'	80	NaN	'48 h'	'Acute toxicity (mortality)'	'EC50'	500	0.00625	'Daphnia magna (neonates)'	'Crustacean'	-2.20412	'Zhu et al., J. Nanopart. Res. 2009; 11 (1) 67–75'
'ZnO'	81	70	'48 h'	'acute immobilisation assay (Daphtoxkit)'	'EC50'	1.7	2.09877e-05	'daphnia magna'	'Crustacean'	-4.67804	'Blinova et al. / Environmental Pollution 158 (2010) 41–4744'
'ZnO'	81	70	'48 h'	'acute immobilisation assay (Daphtoxkit)'	'EC50'	3.4	4.19753e-05	'daphnia magna'	'Crustacean'	-4.37701	'Blinova et al. / Environmental Pollution 158 (2010) 41–4744'
'ZnO'	81	NaN	'48 h'	'Immobilization'	'EC50'	2.6	3.20988e-05	'Daphnia magna'	'Crustacean'	-4.49351	'Sovova et al., 2009, Proceedings,NANOCON Conference, Roznov , Czech Republic, pp 62‐71,'
Daphnia Magna - Fold 3
NP	Molar weight (g/mol)	Size	Exposure time	Assay	Endpoint	Value (mg/l	Value(mol/L)	Cell type	Cell group	Log(endpoint)	reference
'Ag'	108	10	'48 h'	'Mortality test assay'	'LC50'	0.01	9.25926e-08	'Daphnia magna'	'Crustacean'	-7.03342	'Hoheisel et al. 2012, Environ. Toxicol. Chem. 31: 2557–2563'
'Ag'	108	20	'48 h'	'Mortality test assay'	'LC50'	0.014	1.2963e-07	'Daphnia magna'	'Crustacean'	-6.8873	'Hoheisel et al. 2012, Environ. Toxicol. Chem. 31: 2557–2563'
'Ag'	108	30	'48 h'	'Mortality test assay'	'LC50'	0.018	1.66667e-07	'Daphnia magna'	'Crustacean'	-6.77815	'Hoheisel et al. 2012, Environ. Toxicol. Chem. 31: 2557–2563'
'Al2O3'	102	80	'48 h'	'Acute toxicity (mortality)'	'EC50'	500	0.00490196	'Daphnia magna (neonates)'	'Crustacean'	-2.30963	'Zhu et al., J. Nanopart. Res. 2009; 11 (1) 67–75'
'CuO'	79.545	30	'48 h'	'acute immobilisation assay (Daphtoxkit)'	'EC50'	92.7	0.00116538	'daphnia magna'	'Crustacean'	-2.93353	'Blinova et al. / Environmental Pollution 158 (2010) 41–4744'
'TiO2'	80	NaN	'48 h'	'Acute toxicity (immobilization)'	'LC50'	500	0.00625	'Daphnia magna (neonates)'	'Crustacean'	-2.20412	'Zhu et al., J. Nanopart. Res. 2009; 11 (1) 67–75'
'ZnO'	81	20	'48 h'	'Acute toxicity (immobilization)'	'LC50'	1.50343	1.85608e-05	'Daphnia magna (neonates)'	'Crustacean'	-4.7314	'Zhu et al., J. Nanopart. Res. 2009; 11 (1) 67–75'
'ZnO'	81	20	'48 h'	'Acute toxicity (mortality)'	'EC50'	0.618883	7.64053e-06	'Daphnia magna (neonates)'	'Crustacean'	-5.11688	'Zhu et al., J. Nanopart. Res. 2009; 11 (1) 67–75'
Daphnia Magna - Fold 4
NP	Molar weight (g/mol)	Size	Exposure time	Assay	Endpoint	Value (mg/l	Value(mol/L)	Cell type	Cell group	Log(endpoint)	reference
'Ag'	108	30	'48 h'	'Mortality test assay'	'LC50'	0.018	1.66667e-07	'Daphnia magna'	'Crustacean'	-6.77815	'Hoheisel et al. 2012, Environ. Toxicol. Chem. 31: 2557–2563'
'Al2O3'	102	80	'48 h'	'Acute toxicity (immobilization)'	'LC50'	500	0.00490196	'Daphnia magna (neonates)'	'Crustacean'	-2.30963	'Zhu et al., J. Nanopart. Res. 2009; 11 (1) 67–75'
'CuO'	79.545	30	'48 h'	'acute immobilisation assay (Daphtoxkit)'	'EC50'	160	0.00201144	'daphnia magna'	'Crustacean'	-2.69649	'Blinova et al. / Environmental Pollution 158 (2010) 41–4744'
'CuO'	79.545	30	'48 h'	'acute immobilisation assay (Daphtoxkit)'	'EC50'	200	0.0025143	'daphnia magna'	'Crustacean'	-2.59958	'Blinova et al. / Environmental Pollution 158 (2010) 41–4744'
'SiO2'	60	212	'48 h'	'Immobilization'	'ec50'	NaN	NaN	'Daphnia magna'	'Crustacean'	NaN	'Bondarenko et al. Nanotoxicology, 2016; 10(9): 1229–1242'
'ZnO'	81	70	'48 h'	'acute immobilisation assay (Daphtoxkit)'	'EC50'	3.3	4.07407e-05	'daphnia magna'	'Crustacean'	-4.38997	'Blinova et al. / Environmental Pollution 158 (2010) 41–4744'
'ZnO'	81	13.6	'48 h'	'Immobilization'	'ec50'	1.87	2.30864e-05	'Daphnia magna'	'Crustacean'	-4.63664	'Bondarenko et al. Nanotoxicology, 2016; 10(9): 1229–1242'
'ZnO'	81	NaN	'48 h'	'Mortality test assay'	'LC50'	3.2	3.95062e-05	'Daphnia magna (neonates)'	'Crustacean'	-4.40334	'Heinlaan et al. Chemosphere 2008; 71 (7) 1308-1316'
Daphnia Magna - Fold 5
NP	Molar weight (g/mol)	Size	Exposure time	Assay	Endpoint	Value (mg/l	Value(mol/L)	Cell type	Cell group	Log(endpoint)	reference
'Ag'	108	10	'48 h'	'Mortality test assay'	'LC50'	0.004	3.7037e-08	'Daphnia magna'	'Crustacean'	-7.43136	'Hoheisel et al. 2012, Environ. Toxicol. Chem. 31: 2557–2563'
'CuO'	79.545	30	'48 h'	'acute immobilisation assay (Daphtoxkit)'	'EC50'	224	0.00281602	'daphnia magna'	'Crustacean'	-2.55036	'Blinova et al. / Environmental Pollution 158 (2010) 41–4744'
'La2O3'	326	59	'48 h'	'Acute immobilization'	'ec50'	500	0.00153374	'Daphnia magna'	'Crustacean'	-2.81425	'Balusamy et al. Environ. Sci.: Processes Impacts, 2015,17, 1265-1270'
'MgO'	40	NaN	'48 h'	'Immobilization'	'EC50'	25.46	0.0006365	'Daphnia magna'	'Crustacean'	-3.1962	'Sovova et al., 2009, Proceedings,NANOCON Conference, Roznov , Czech Republic, pp 62‐71,'
'TiO2'	80	5	'48 h'	'Immobilization'	'ec50'	NaN	NaN	'Daphnia magna'	'Crustacean'	NaN	'Bondarenko et al. Nanotoxicology, 2016; 10(9): 1229–1242'
'TiO2'	80	NaN	'48 h'	'Mortality test assay'	'LC50'	20000	0.25	'Daphnia magna (neonates)'	'Crustacean'	-0.60206	'Heinlaan et al. Chemosphere 2008; 71 (7) 1308-1316'
'TiO2'	80	21	'48 h'	'Acute toxicity (mortality)'	'EC50'	NaN	NaN	'Daphnia magna (neonates)'	'Crustacean'	NaN	'Zhu et al. Chemosphere 2010; 78 (3) 209-216'
'ZnO'	81	70	'48 h'	'acute immobilisation assay (Daphtoxkit)'	'EC50'	3.5	4.32099e-05	'daphnia magna'	'Crustacean'	-4.36442	'Blinova et al. / Environmental Pollution 158 (2010) 41–4744'

## Sheet: HaCaT
HaCaT- Fold 1
NP	Molar weight (g/mol)	Size	Exposure time	Assay	Endpoint	Value (mg/l	Value(mol/L)	Cell type	Cell group	Log(endpoint)	reference
'Bi2O3'	466	90	'24 h'	'CytoTox-Glo Cytotoxicity Assay'	'LC50'	1459	0.0031309	'Hacat cells'	'Human cells'	-2.50433	'Gajewicz et al. Nanotoxicology, 2015;9(3):313-25'
'Co3O4'	241	NaN	'24 h'	'Almarblue assay'	'EC50'	241	0.001	'HaCaT cells'	'Human cells'	-3	'Mauro et al. Int. J. Environ. Res. Public Health 2015, 12, 8263-8280'
'In2O3'	278	29.8	'24 h'	'CytoTox-Glo Cytotoxicity Assay'	'LC50'	332	0.00119424	'Hacat cells'	'Human cells'	-2.92291	'Gajewicz et al. Nanotoxicology, 2015;9(3):313-25'
'MgO'	40	20	'24 h'	'MTT assay'	'ec50'	1000	0.025	'Hacat'	'Human cells'	-1.60206	'Horie et al. Metallomics, 2012, 4, 350–360'
'NiO'	75	20	'24 h'	'CytoTox-Glo Cytotoxicity Assay'	'LC50'	242	0.00322667	'Hacat cells'	'Human cells'	-2.49125	'Gajewicz et al. Nanotoxicology, 2015;9(3):313-25'
'Sb2O3'	292	NaN	'24 h'	'CytoTox-Glo Cytotoxicity Assay'	'LC50'	1429	0.00489384	'Hacat cells'	'Human cells'	-2.31035	'Gajewicz et al. Nanotoxicology, 2015;9(3):313-25'
'ZnO'	81	21	'24 h'	'MTT assay'	'ec50'	100	0.00123457	'Hacat'	'Human cells'	-2.90849	'Horie et al. Metallomics, 2012, 4, 350–360'
'ZrO2'	123	46.7	'24 h'	'CytoTox-Glo Cytotoxicity Assay'	'LC50'	1188	0.00965854	'Hacat cells'	'Human cells'	-2.01509	'Gajewicz et al. Nanotoxicology, 2015;9(3):313-25'
HaCaT - Fold 2
NP	Molar weight (g/mol)	Size	Exposure time	Assay	Endpoint	Value (mg/l	Value(mol/L)	Cell type	Cell group	Log(endpoint)	reference
'Al2O3'	102	31	'24 h'	'MTT assay'	'ec50'	1000	0.00980392	'Hacat'	'Human cells'	-2.0086	'Horie et al. Metallomics, 2012, 4, 350–360'
'Al2O3'	102	44	'24 h'	'CytoTox-Glo Cytotoxicity Assay'	'LC50'	1439	0.0141078	'Hacat cells'	'Human cells'	-1.85054	'Gajewicz et al. Nanotoxicology, 2015;9(3):313-25'
'Co3O4'	241	NaN	'7 days'	'Almarblue assay'	'EC50'	8.917	3.7e-05	'HaCaT cells'	'Human cells'	-4.4318	'Mauro et al. Int. J. Environ. Res. Public Health 2015, 12, 8263-8280'
'Co3O4'	241	NaN	'48 h'	'MTT assay'	'EC50'	241	0.001	'HaCaT cells'	'Human cells'	-3	'Mauro et al. Int. J. Environ. Res. Public Health 2015, 12, 8263-8280'
'TiO2'	80	NaN	'24 h'	'MTT assay'	'ec50'	1000	0.0125	'Hacat'	'Human cells'	-1.90309	'Horie et al. Metallomics, 2012, 4, 350–360'
'TiO2'	80	NaN	'24 h'	'MTT assay'	'ec50'	1000	0.0125	'Hacat'	'Human cells'	-1.90309	'Horie et al. Metallomics, 2012, 4, 350–360'
'WO3'	232	30	'24 h'	'MTT assay'	'ec50'	1000	0.00431034	'Hacat'	'Human cells'	-2.36549	'Horie et al. Metallomics, 2012, 4, 350–360'
'ZnO'	81	71	'24 h'	'CytoTox-Glo Cytotoxicity Assay'	'LC50'	39	0.000481481	'Hacat cells'	'Human cells'	-3.31742	'Gajewicz et al. Nanotoxicology, 2015;9(3):313-25'
'ZrO2'	123	NaN	'24 h'	'MTT assay'	'ec50'	1000	0.00813008	'Hacat'	'Human cells'	-2.08991	'Horie et al. Metallomics, 2012, 4, 350–360'
HaCaT - Fold 3
NP	Molar weight (g/mol)	Size	Exposure time	Assay	Endpoint	Value (mg/l	Value(mol/L)	Cell type	Cell group	Log(endpoint)	reference
'CoO'	75	NaN	'24 h'	'CytoTox-Glo Cytotoxicity Assay'	'LC50'	110	0.00146667	'Hacat cells'	'Human cells'	-2.83367	'Gajewicz et al. Nanotoxicology, 2015;9(3):313-25'
'Cr2O3'	152	60	'24 h'	'CytoTox-Glo Cytotoxicity Assay'	'LC50'	455	0.00299342	'Hacat cells'	'Human cells'	-2.52383	'Gajewicz et al. Nanotoxicology, 2015;9(3):313-25'
'CuO'	79.545	48	'24 h'	'MTT assay'	'ec50'	100	0.00125715	'Hacat'	'Human cells'	-2.90061	'Horie et al. Metallomics, 2012, 4, 350–360'
'La2O3'	326	45.6	'24 h'	'CytoTox-Glo Cytotoxicity Assay'	'LC50'	443	0.0013589	'Hacat cells'	'Human cells'	-2.86681	'Gajewicz et al. Nanotoxicology, 2015;9(3):313-25'
'Mn2O3'	158	29.8	'24 h'	'CytoTox-Glo Cytotoxicity Assay'	'LC50'	362	0.00229114	'Hacat cells'	'Human cells'	-2.63995	'Gajewicz et al. Nanotoxicology, 2015;9(3):313-25'
'SnO2'	151	21	'24 h'	'MTT assay'	'ec50'	1000	0.00662252	'Hacat'	'Human cells'	-2.17898	'Horie et al. Metallomics, 2012, 4, 350–360'
'TiO2'	80	42.3	'24 h'	'CytoTox-Glo Cytotoxicity Assay'	'LC50'	1389	0.0173625	'Hacat cells'	'Human cells'	-1.76039	'Gajewicz et al. Nanotoxicology, 2015;9(3):313-25'
'Y2O3'	226	38	'24 h'	'CytoTox-Glo Cytotoxicity Assay'	'LC50'	1390	0.00615044	'Hacat cells'	'Human cells'	-2.21109	'Gajewicz et al. Nanotoxicology, 2015;9(3):313-25'
HaCaT - Fold 4
NP	Molar weight (g/mol)	Size	Exposure time	Assay	Endpoint	Value (mg/l	Value(mol/L)	Cell type	Cell group	Log(endpoint)	reference
'CeO2'	172	14	'24 h'	'MTT assay'	'ec50'	1000	0.00581395	'Hacat'	'Human cells'	-2.23553	'Horie et al. Metallomics, 2012, 4, 350–360'
'Fe2O3'	160	39	'24 h'	'MTT assay'	'ec50'	1000	0.00625	'Hacat'	'Human cells'	-2.20412	'Horie et al. Metallomics, 2012, 4, 350–360'
'Gd2O3'	362	NaN	'24 h'	'MTT assay'	'ec50'	NaN	NaN	'Hacat'	'Human cells'	NaN	'Horie et al. Metallomics, 2012, 4, 350–360'
'SiO2'	60	15	'24 h'	'CytoTox-Glo Cytotoxicity Assay'	'LC50'	453	0.00755	'Hacat cells'	'Human cells'	-2.12205	'Gajewicz et al. Nanotoxicology, 2015;9(3):313-25'
'SnO2'	151	46.1	'24 h'	'CytoTox-Glo Cytotoxicity Assay'	'LC50'	322	0.00213245	'Hacat cells'	'Human cells'	-2.67112	'Gajewicz et al. Nanotoxicology, 2015;9(3):313-25'
'TiO2'	80	NaN	'24 h'	'MTT assay'	'ec50'	1000	0.0125	'Hacat'	'Human cells'	-1.90309	'Horie et al. Metallomics, 2012, 4, 350–360'
'Y2O3'	226	33	'24 h'	'MTT assay'	'ec50'	1000	0.00442478	'Hacat'	'Human cells'	-2.35411	'Horie et al. Metallomics, 2012, 4, 350–360'
'ZnO'	81	21	'24 h'	'MTT assay'	'ec50'	100	0.00123457	'Hacat'	'Human cells'	-2.90849	'Horie et al. Metallomics, 2012, 4, 350–360'
HaCaT - Fold 5
NP	Molar weight (g/mol)	Size	Exposure time	Assay	Endpoint	Value (mg/l	Value(mol/L)	Cell type	Cell group	Log(endpoint)	reference
'Ag'	108	50	'24 h'	'Cytotoxicity assay'	'LD50'	48.2	0.00185185	'Hacat cells'	'Human cells'	-2.73239	'Comfort et al. Colloids Surf B Biointerfaces,2014;123:136-42'
'Co3O4'	241	NaN	'48 h'	'Almarblue assay'	'EC50'	241	0.001	'HaCaT cells'	'Human cells'	-3	'Mauro et al. Int. J. Environ. Res. Public Health 2015, 12, 8263-8280'
'Co3O4'	241	NaN	'7 days'	'MTT assay'	'EC50'	31.33	0.00013	'HaCaT cells'	'Human cells'	-3.88606	'Mauro et al. Int. J. Environ. Res. Public Health 2015, 12, 8263-8280'
'Co3O4'	241	NaN	'24 h'	'MTT assay'	'EC50'	241	0.001	'HaCaT cells'	'Human cells'	-3	'Mauro et al. Int. J. Environ. Res. Public Health 2015, 12, 8263-8280'
'Fe2O3'	160	32	'24 h'	'CytoTox-Glo Cytotoxicity Assay'	'LC50'	1483	0.00926875	'Hacat cells'	'Human cells'	-2.03298	'Gajewicz et al. Nanotoxicology, 2015;9(3):313-25'
'La2O3'	326	NaN	'24 h'	'MTT assay'	'ec50'	NaN	NaN	'Hacat'	'Human cells'	NaN	'Horie et al. Metallomics, 2012, 4, 350–360'
'V2O3'	150	NaN	'24 h'	'CytoTox-Glo Cytotoxicity Assay'	'LC50'	855	0.0057	'Hacat cells'	'Human cells'	-2.24413	'Gajewicz et al. Nanotoxicology, 2015;9(3):313-25'
'WO3'	232	NaN	'24 h'	'CytoTox-Glo Cytotoxicity Assay'	'LC50'	634	0.00273276	'Hacat cells'	'Human cells'	-2.5634	'Gajewicz et al. Nanotoxicology, 2015;9(3):313-25'
