# Supplementary material for: Metal and metal oxide nanoparticle toxicity: moving towards a more holistic structure–activity approach
Source: Royal Society of Chemistry journal article supplement (doi:10.1039/d2en00897a), 2023-01-01
Supplement: d2en00897a4.xlsx [file d2en00897a4.xlsx]

## Sheet: Human
Human Cells- Traning data
NP	Molar weight (g/mol)	Size	Exposure time	Assay	Endpoint	Value (mg/l	Value(mol/L)	Cell type	Cell group	Log(endpoint)	reference
'Ag'	108	5	'24 h'	'MTT'	'EC50'	1	9.25926e-06	'A549'	'Human cells'	-5.03342	'Liu et al. Nanotoxicology, 2010; 4(3): 319–330'
'Ag'	108	5	'24 h'	'MTT'	'EC50'	0.59	5.46296e-06	'HepG2'	'Human cells'	-5.26257	'Liu et al. Nanotoxicology, 2010; 4(3): 319–330'
'Ag'	108	5	'24 h'	'MTT'	'EC50'	0.5	4.62963e-06	'MCF‐7'	'Human cells'	-5.33445	'Liu et al. Nanotoxicology, 2010; 4(3): 319–330'
'Ag'	108	5	'24 h'	'MTT'	'EC50'	9.9	9.16667e-05	'SGC‐7901'	'Human cells'	-4.03779	'Liu et al. Nanotoxicology, 2010; 4(3): 319–330'
'Ag'	108	20	'24 h'	'MTT'	'EC50'	9.96	9.22222e-05	'A549'	'Human cells'	-4.03516	'Liu et al. Nanotoxicology, 2010; 4(3): 319–330'
'Ag'	108	20	'24 h'	'MTT'	'EC50'	25.5	0.000236111	'HepG2'	'Human cells'	-3.62688	'Liu et al. Nanotoxicology, 2010; 4(3): 319–330'
'Ag'	108	20	'24 h'	'MTT'	'EC50'	14.3	0.000132407	'MCF‐7'	'Human cells'	-3.87809	'Liu et al. Nanotoxicology, 2010; 4(3): 319–330'
'Ag'	108	20	'24 h'	'MTT'	'EC50'	50.9	0.000471296	'SGC‐7901'	'Human cells'	-3.32671	'Liu et al. Nanotoxicology, 2010; 4(3): 319–330'
'Ag'	108	20.4	'24 h'	'MTT assay'	'ec50'	4.6	4.25926e-05	'human mesenchymal stem cells (MTT)'	'Human cells'	-4.37067	'Bondarenko et al. Nanotoxicology, 2016; 10(9): 1229–1242'
'Ag'	108	50	'24 h'	'MTT'	'EC50'	13.3	0.000123148	'A549'	'Human cells'	-3.90957	'Liu et al. Nanotoxicology, 2010; 4(3): 319–330'
'Ag'	108	50	'24 h'	'Cytotoxicity assay'	'LD50'	48.2	0.00185185	'Hacat cells'	'Human cells'	-2.73239	'Comfort et al. Colloids Surf B Biointerfaces,2014;123:136-42'
'Ag'	108	50	'24 h'	'MTT'	'EC50'	33.6	0.000311111	'HepG2'	'Human cells'	-3.50708	'Liu et al. Nanotoxicology, 2010; 4(3): 319–330'
'Ag'	108	50	'24 h'	'MTT'	'EC50'	47.6	0.000440741	'MCF‐7'	'Human cells'	-3.35582	'Liu et al. Nanotoxicology, 2010; 4(3): 319–330'
'Ag'	108	312	'24 h'	'Neutral Red assay.'	'IC50'	380.9	0.00352685	'a549'	'Human cells'	-2.45261	'Lanone et al. Particle and Fibre Toxicology 2009, 6:25'
'Ag'	108	312	'24 h'	'MTT assay'	'IC50'	55.6	0.000514815	'THP-1'	'Human cells'	-3.28835	'Lanone et al. Particle and Fibre Toxicology 2009, 6:14'
'Ag'	108	312	'24 h'	'MTT assay'	'IC50'	1408	0.013037	'THP-1'	'Human cells'	-1.88482	'Lanone et al. Particle and Fibre Toxicology 2009, 6:14'
'Ag'	108	312	'24 h'	'Neutral Red assay.'	'IC50'	18.36	0.00017	'THP-1'	'Human cells'	-3.76955	'Lanone et al. Particle and Fibre Toxicology 2009, 6:29'
'Ag'	108	312	'24 h'	'Neutral Red assay.'	'IC50'	27.6	0.000255556	'THP-1'	'Human cells'	-3.59251	'Lanone et al. Particle and Fibre Toxicology 2009, 6:29'
'Ag'	108	NaN	'24 h'	'Cell viability (MTT assay)'	'EC50'	88.6	0.00082037	'PC3'	'Human cells'	-3.08599	'Kim et al. Bull. Korean Chem. Soc. 2012, Vol. 33, No. 10'
'Al2O3'	102	11.9	'24 h'	'CCK-8 cytotoxicity assay'	'EC50'	705.668	0.00691831	'A549 cells'	'Human cells'	-2.16	'Cao et al. Green Chem., 2020,22, 3512-3521'
'Al2O3'	102	14.7	'24 h'	'ATP assay'	'EC50'	NaN	NaN	'BEAS-2B cells, ATP assay'	'Human cells'	NaN	'Zhang et al. ACS Nano 2012, 6, 5, 4349–4368'
'Al2O3'	102	31	'24 h'	'MTT assay'	'ec50'	1000	0.00980392	'A549'	'Human cells'	-2.0086	'Horie et al. Metallomics, 2012, 4, 350–360'
'Al2O3'	102	31	'24 h'	'MTT assay'	'ec50'	1000	0.00980392	'Hacat'	'Human cells'	-2.0086	'Horie et al. Metallomics, 2012, 4, 350–360'
'Al2O3'	102	44	'24 h'	'CytoTox-Glo Cytotoxicity Assay'	'LC50'	1439	0.0141078	'Hacat cells'	'Human cells'	-1.85054	'Gajewicz et al. Nanotoxicology, 2015;9(3):313-25'
'Al2O3'	102	NaN	'24 h'	'MTT assay'	'IC50'	866	0.0084902	'THP-1'	'Human cells'	-2.07108	'Lanone et al. Particle and Fibre Toxicology 2009, 6:14'
'Al2O3'	102	28.15	'24 h'	'Cytotoxicity (PI staining)'	'ec50 (in SCM medium)'	NaN	NaN	'A549 cells'	'Human cells'	NaN	'Areecheewakul, et al. NanoImpact 18 (2020) 100214'
'Au'	197	NaN	'24 h'	'Cell viability (MTT assay)'	'EC50'	66.4	0.000337056	'HeLa cells'	'Human cells'	-3.4723	'Kim et al. Bull. Korean Chem. Soc. 2012, Vol. 33, No. 10'
'Au'	197	NaN	'24 h'	'Cell viability (MTT assay)'	'EC50'	82.9	0.000420812	'PC3'	'Human cells'	-3.37591	'Kim et al. Bull. Korean Chem. Soc. 2012, Vol. 33, No. 10'
'Bi2O3'	466	90	'24 h'	'CytoTox-Glo Cytotoxicity Assay'	'LC50'	1459	0.0031309	'Hacat cells'	'Human cells'	-2.50433	'Gajewicz et al. Nanotoxicology, 2015;9(3):313-25'
'Bi2O3'	466	149	'24 h'	'MTT'	'LC50'	25	5.36481e-05	'HepG2'	'Human cells'	-4.27045	'Abudayyak et al. / Chemosphere 169 (2017) 117e123118'
'Bi2O3'	466	149	'24 h'	'MTT'	'LC50'	25	5.36481e-05	'A549'	'Human cells'	-4.27045	'Abudayyak et al. / Chemosphere 169 (2017) 117e123118'
'Bi2O3'	466	149	'24 h'	'NRU assay'	'LC50'	100	0.000214592	'HepG2'	'Human cells'	-3.66839	'Abudayyak et al. / Chemosphere 169 (2017) 117e123118'
'Bi2O3'	466	149	'24 h'	'NRU assay'	'LC50'	100	0.000214592	'NRK-52E'	'Human cells'	-3.66839	'Abudayyak et al. / Chemosphere 169 (2017) 117e123118'
'Bi2O3'	466	149	'24 h'	'NRU assay'	'LC50'	75	0.000160944	'Caco-2'	'Human cells'	-3.79332	'Abudayyak et al. / Chemosphere 169 (2017) 117e123118'
'Bi2O3'	466	149	'24 h'	'NRU assay'	'LC50'	75	0.000160944	'A549'	'Human cells'	-3.79332	'Abudayyak et al. / Chemosphere 169 (2017) 117e123118'
'Bi2O3'	466	164.97	'24 h'	'CCK-8 cytotoxicity assay'	'EC50'	337.587	0.000724436	'A549 cells'	'Human cells'	-3.14	'Cao et al. Green Chem., 2020,22, 3512-3521'
'CeO2'	172	14	'24 h'	'MTT assay'	'ec50'	1000	0.00581395	'A549'	'Human cells'	-2.23553	'Horie et al. Metallomics, 2012, 4, 350–360'
'CeO2'	172	14	'24 h'	'MTT assay'	'ec50'	1000	0.00581395	'Hacat'	'Human cells'	-2.23553	'Horie et al. Metallomics, 2012, 4, 350–360'
'CeO2'	172	15.38	'24 h'	'CCK-8 cytotoxicity assay'	'EC50'	1885.94	0.0109648	'A549 cells'	'Human cells'	-1.96	'Cao et al. Green Chem., 2020,22, 3512-3521'
'CeO2'	172	33.4	'24 h'	'MTT assay'	'IC50'	1058	0.00615116	'THP-1'	'Human cells'	-2.21104	'Lanone et al. Particle and Fibre Toxicology 2009, 6:14'
'CeO2'	172	33.4	'24 h'	'Neutral Red assay.'	'IC50'	476.6	0.00277093	'THP-1'	'Human cells'	-2.55737	'Lanone et al. Particle and Fibre Toxicology 2009, 6:29'
'CeO2'	172	NaN	'24 h'	'Cellular proliferation colorimetric assay'	'LD 50'	1000	0.00581395	'A549'	'Human cells'	-2.23553	'Lozano et al 2011 J. Phys.: Conf. Ser. 304 012046'
'CeO2'	172	NaN	'48 h'	'Cellular proliferation colorimetric assay'	'LD 50'	1000	0.00581395	'A549'	'Human cells'	-2.23553	'Lozano et al 2011 J. Phys.: Conf. Ser. 304 012046'
'CeO2'	172	NaN	'48 h'	'Cellular proliferation colorimetric assay'	'LD 50'	1000	0.00581395	'HeLa cells'	'Human cells'	-2.23553	'Lozano et al 2011 J. Phys.: Conf. Ser. 304 012046'
'CeO2'	172	NaN	'24 h'	'Cellular proliferation colorimetric assay'	'LD 50'	1000	0.00581395	'NCl H460'	'Human cells'	-2.23553	'Lozano et al 2011 J. Phys.: Conf. Ser. 304 012046'
'CeO2'	172	NaN	'48 h'	'Cellular proliferation colorimetric assay'	'LD 50'	1000	0.00581395	'NCl H460'	'Human cells'	-2.23553	'Lozano et al 2011 J. Phys.: Conf. Ser. 304 012046'
'CeO2'	172	NaN	'48 h'	'Cellular proliferation colorimetric assay'	'LD 50'	1000	0.00581395	'SK- MES 1'	'Human cells'	-2.23553	'Lozano et al 2011 J. Phys.: Conf. Ser. 304 012046'
'Co'	59	20	'24 h'	'MTT assay'	'IC50'	1142	0.0193559	'a549'	'Human cells'	-1.71319	'Lanone et al. Particle and Fibre Toxicology 2009, 6:14'
'Co'	59	20	'24 h'	'MTT assay'	'IC50'	3039	0.0515085	'a549'	'Human cells'	-1.28812	'Lanone et al. Particle and Fibre Toxicology 2009, 6:14'
'Co'	59	20	'24 h'	'Neutral Red assay.'	'IC50'	1243	0.0210678	'a549'	'Human cells'	-1.67638	'Lanone et al. Particle and Fibre Toxicology 2009, 6:26'
'Co'	59	20	'24 h'	'Neutral Red assay.'	'IC50'	241.6	0.00409492	'a549'	'Human cells'	-2.38776	'Lanone et al. Particle and Fibre Toxicology 2009, 6:27'
'Co'	59	20	'24 h'	'MTT assay'	'IC50'	1.42	2.40678e-05	'THP-1'	'Human cells'	-4.61856	'Lanone et al. Particle and Fibre Toxicology 2009, 6:14'
'Co'	59	20	'24 h'	'MTT assay'	'IC50'	69.6	0.00117966	'THP-1'	'Human cells'	-2.92824	'Lanone et al. Particle and Fibre Toxicology 2009, 6:14'
'Co'	59	20	'24 h'	'Neutral Red assay.'	'IC50'	164.7	0.00279153	'THP-1'	'Human cells'	-2.55416	'Lanone et al. Particle and Fibre Toxicology 2009, 6:29'
'Co'	59	NaN	'24 h'	'Cell viability (MTT assay)'	'EC50'	71.8	0.00121695	'HeLa cells'	'Human cells'	-2.91473	'Kim et al. Bull. Korean Chem. Soc. 2012, Vol. 33, No. 10'
'Co3O4'	241	9.2	'24 h'	'NRU assay'	'IC50'	130.9	0.000543154	'A549'	'Human cells'	-3.26508	'Ivansk et al. Curr Top Med Chem., 2015;15(18):1914-29'
'Co3O4'	241	9.2	'24 h'	'NRU assay'	'IC50'	123	0.000510373	'Caco2'	'Human cells'	-3.29211	'Ivansk et al. Curr Top Med Chem., 2015;15(18):1914-29'
'Co3O4'	241	10	'24 h'	'ATP assay'	'EC50'	23.4423	9.72709e-05	'BEAS-2B cells, ATP assay'	'Human cells'	-4.01202	'Zhang et al. ACS Nano 2012, 6, 5, 4349–4368'
'Co3O4'	241	NaN	'12 h'	'resazurin fluorescence assay'	'ec50'	105.4	0.000437344	'A549'	'Human cells'	-3.35918	'Titma et al. Cytotechnology. 2016;68(6):2363-2377'
'Co3O4'	241	NaN	'36 h'	'resazurin fluorescence assay'	'ec50'	108.1	0.000448548	'A549'	'Human cells'	-3.34819	'Titma et al. Cytotechnology. 2016;68(6):2363-2377'
'Co3O4'	241	NaN	'60 h'	'resazurin fluorescence assay'	'ec50'	109.8	0.000455602	'A549'	'Human cells'	-3.34141	'Titma et al. Cytotechnology. 2016;68(6):2363-2377'
'Co3O4'	241	NaN	'7 days'	'Almarblue assay'	'EC50'	8.917	3.7e-05	'HaCaT cells'	'Human cells'	-4.4318	'Mauro et al. Int. J. Environ. Res. Public Health 2015, 12, 8263-8280'
'Co3O4'	241	NaN	'24 h'	'MTT assay'	'EC50'	241	0.001	'HaCaT cells'	'Human cells'	-3	'Mauro et al. Int. J. Environ. Res. Public Health 2015, 12, 8263-8280'
'CoO'	75	50	'24 h'	'Cell viability'	'EC50'	12.5	0.000166667	'BEAS-2B'	'Human cells'	-3.77815	'Huang et al. Materials 2010, 3, 4842-4859;'
'CoO'	75	71.8	'24 h'	'ATP assay'	'EC50'	43.6516	0.000582021	'BEAS-2B cells, ATP assay'	'Human cells'	-3.23506	'Zhang et al. ACS Nano 2012, 6, 5, 4349–4368'
'CoO'	75	71.8	'24 h'	'MTS assay'	'EC50'	51.2861	0.000683815	'BEAS-2B cells, MTS assay'	'Human cells'	-3.16506	'Zhang et al. ACS Nano 2012, 6, 5, 4349–4368'
'CoO'	75	75	'24 h'	'MTS assay'	'EC50'	157.5	0.0021	'A549 CELLS'	'Human cells'	-2.67778	'Jeong et al. Front Pharmacol. 2018 22;9:15.'
'CoO'	75	75	'24 h'	'MTS assay'	'EC50'	60	0.0008	'THP-1 CELLS'	'Human cells'	-3.09691	'Jeong et al. Front Pharmacol. 2018 22;9:15.'
'CoO'	75	NaN	'24 h'	'CytoTox-Glo Cytotoxicity Assay'	'LC50'	110	0.00146667	'Hacat cells'	'Human cells'	-2.83367	'Gajewicz et al. Nanotoxicology, 2015;9(3):313-25'
'Cr2O3'	152	60	'24 h'	'CytoTox-Glo Cytotoxicity Assay'	'LC50'	455	0.00299342	'Hacat cells'	'Human cells'	-2.52383	'Gajewicz et al. Nanotoxicology, 2015;9(3):313-25'
'Cr2O3'	152	61.38	'24 h'	'CCK-8 cytotoxicity assay'	'EC50'	115.304	0.000758578	'A549 cells'	'Human cells'	-3.12	'Cao et al. Green Chem., 2020,22, 3512-3521'
'Cr2O3'	152	193	'24 h'	'ATP assay'	'EC50'	35.4813	0.00023343	'BEAS-2B cells, ATP assay'	'Human cells'	-3.63184	'Zhang et al. ACS Nano 2012, 6, 5, 4349–4368'
'Cr2O3'	152	193	'24 h'	'MTS assay'	'EC50'	338.844	0.00222924	'BEAS-2B cells, MTS assay'	'Human cells'	-2.65184	'Zhang et al. ACS Nano 2012, 6, 5, 4349–4368'
'Cu'	64	22.9	'24 h'	'MTT assay'	'IC50'	17.04	0.00026625	'a549'	'Human cells'	-3.57471	'Lanone et al. Particle and Fibre Toxicology 2009, 6:14'
'Cu'	64	22.9	'24 h'	'Neutral Red assay.'	'IC50'	1698	0.0265312	'a549'	'Human cells'	-1.57624	'Lanone et al. Particle and Fibre Toxicology 2009, 6:17'
'Cu'	64	22.9	'24 h'	'Neutral Red assay.'	'IC50'	70.79	0.00110609	'a549'	'Human cells'	-2.95621	'Lanone et al. Particle and Fibre Toxicology 2009, 6:18'
'Cu'	64	22.9	'24 h'	'MTT assay'	'IC50'	1.65	2.57812e-05	'THP-1'	'Human cells'	-4.5887	'Lanone et al. Particle and Fibre Toxicology 2009, 6:14'
'Cu'	64	22.9	'24 h'	'MTT assay'	'IC50'	6.46	0.000100937	'THP-1'	'Human cells'	-3.99595	'Lanone et al. Particle and Fibre Toxicology 2009, 6:14'
'Cu'	64	22.9	'24 h'	'Neutral Red assay.'	'IC50'	13.15	0.000205469	'THP-1'	'Human cells'	-3.68725	'Lanone et al. Particle and Fibre Toxicology 2009, 6:29'
'Cu'	64	90	'24 h'	'MTT assay'	'IC50'	33.74	0.000527187	'a549'	'Human cells'	-3.27803	'Lanone et al. Particle and Fibre Toxicology 2009, 6:14'
'Cu'	64	90	'24 h'	'Neutral Red assay.'	'IC50'	74.95	0.00117109	'a549'	'Human cells'	-2.93141	'Lanone et al. Particle and Fibre Toxicology 2009, 6:15'
'Cu'	64	90	'24 h'	'Neutral Red assay.'	'IC50'	31.27	0.000488594	'a549'	'Human cells'	-3.31105	'Lanone et al. Particle and Fibre Toxicology 2009, 6:16'
'Cu'	64	90	'24 h'	'Neutral Red assay.'	'IC50'	5.7	8.90625e-05	'THP-1'	'Human cells'	-4.05031	'Lanone et al. Particle and Fibre Toxicology 2009, 6:29'
'Cu'	64	90	'24 h'	'Neutral Red assay.'	'IC50'	0.39	6.09375e-06	'THP-1'	'Human cells'	-5.21512	'Lanone et al. Particle and Fibre Toxicology 2009, 6:29'
'Cu'	64	NaN	'24 h'	'Cell viability (MTT assay)'	'EC50'	85.5	0.00133594	'HeLa cells'	'Human cells'	-2.87421	'Kim et al. Bull. Korean Chem. Soc. 2012, Vol. 33, No. 10'
'Cu'	64	NaN	'24 h'	'Cell viability (MTT assay)'	'EC50'	91.7	0.00143281	'PC3'	'Human cells'	-2.84381	'Kim et al. Bull. Korean Chem. Soc. 2012, Vol. 33, No. 10'
'Cu2O'	143	NaN	'24 h'	'MTT assay'	'IC50'	45	0.000314685	'a549'	'Human cells'	-3.50212	'Lanone et al. Particle and Fibre Toxicology 2009, 6:14'
'Cu2O'	143	NaN	'24 h'	'MTT assay'	'IC50'	52.52	0.000367273	'a549'	'Human cells'	-3.43501	'Lanone et al. Particle and Fibre Toxicology 2009, 6:14'
'Cu2O'	143	NaN	'24 h'	'Neutral Red assay.'	'IC50'	39.96	0.000279441	'a549'	'Human cells'	-3.55371	'Lanone et al. Particle and Fibre Toxicology 2009, 6:19'
'Cu2O'	143	NaN	'24 h'	'Neutral Red assay.'	'IC50'	164.7	0.00115175	'a549'	'Human cells'	-2.93864	'Lanone et al. Particle and Fibre Toxicology 2009, 6:20'
'Cu2O'	143	NaN	'24 h'	'MTT assay'	'IC50'	3.42	2.39161e-05	'THP-1'	'Human cells'	-4.62131	'Lanone et al. Particle and Fibre Toxicology 2009, 6:14'
'Cu2O'	143	NaN	'24 h'	'MTT assay'	'IC50'	11.53	8.06294e-05	'THP-1'	'Human cells'	-4.09351	'Lanone et al. Particle and Fibre Toxicology 2009, 6:14'
'Cu2O'	143	NaN	'24 h'	'Neutral Red assay.'	'IC50'	8.15	5.6993e-05	'THP-1'	'Human cells'	-4.24418	'Lanone et al. Particle and Fibre Toxicology 2009, 6:29'
'CuO'	79.545	11.9	'24 h'	'NRU assay'	'IC50'	18.9	0.000237601	'A549'	'Human cells'	-3.62415	'Ivansk et al. Curr Top Med Chem., 2015;15(18):1914-29'
'CuO'	79.545	11.9	'24 h'	'NRU assay'	'IC50'	12.6	0.000158401	'Caco2'	'Human cells'	-3.80024	'Ivansk et al. Curr Top Med Chem., 2015;15(18):1914-29'
'CuO'	79.545	12.8	'24 h'	'ATP assay'	'EC50'	23.9883	0.000301569	'BEAS-2B cells, ATP assay'	'Human cells'	-3.52061	'Zhang et al. ACS Nano 2012, 6, 5, 4349–4368'
'CuO'	80	28.5	'24 h'	'MTS assay'	'EC50'	160	0.002	'A549 CELLS'	'Human cells'	-2.69897	'Jeong et al. Front Pharmacol. 2018 22;9:15.'
'CuO'	80	28.5	'24 h'	'MTS assay'	'EC50'	14.4	0.00018	'THP-1 CELLS'	'Human cells'	-3.74473	'Jeong et al. Front Pharmacol. 2018 22;9:15.'
'CuO'	79.545	30	'24 h'	'MTT assay'	'IC50'	10.07	0.000126595	'a549'	'Human cells'	-3.89758	'Lanone et al. Particle and Fibre Toxicology 2009, 6:14'
'CuO'	79.545	30	'24 h'	'Neutral Red assay.'	'IC50'	11.44	0.000143818	'a549'	'Human cells'	-3.84219	'Lanone et al. Particle and Fibre Toxicology 2009, 6:23'
'CuO'	79.545	30	'24 h'	'Neutral Red assay.'	'IC50'	20.84	0.00026199	'a549'	'Human cells'	-3.58172	'Lanone et al. Particle and Fibre Toxicology 2009, 6:24'
'CuO'	79.545	30	'24 h'	'MTT assay'	'IC50'	3	3.77145e-05	'THP-1'	'Human cells'	-4.42349	'Lanone et al. Particle and Fibre Toxicology 2009, 6:14'
'CuO'	79.545	30	'24 h'	'MTT assay'	'IC50'	7.3	9.1772e-05	'THP-1'	'Human cells'	-4.03729	'Lanone et al. Particle and Fibre Toxicology 2009, 6:14'
'CuO'	79.545	30	'24 h'	'Neutral Red assay.'	'IC50'	4.98	6.26061e-05	'THP-1'	'Human cells'	-4.20338	'Lanone et al. Particle and Fibre Toxicology 2009, 6:29'
'CuO'	79.545	42	'18 h'	'Cytotoxicity'	'EC50'	20	0.00025143	'A549'	'Human cells'	-3.59958	'Karlsson et al. Chem. Res. Toxicol. 2008, Vol. 21, No. 9'
'CuO'	79.545	45.4	'24 h'	'MTT assay'	'IC50'	35.61	0.000447671	'a549'	'Human cells'	-3.34904	'Lanone et al. Particle and Fibre Toxicology 2009, 6:14'
'CuO'	79.545	45.4	'24 h'	'MTT assay'	'IC50'	47.41	0.000596015	'a549'	'Human cells'	-3.22474	'Lanone et al. Particle and Fibre Toxicology 2009, 6:14'
'CuO'	79.545	45.4	'24 h'	'Neutral Red assay.'	'IC50'	832.7	0.0104683	'a549'	'Human cells'	-1.98012	'Lanone et al. Particle and Fibre Toxicology 2009, 6:21'
'CuO'	79.545	45.4	'24 h'	'Neutral Red assay.'	'IC50'	102.5	0.00128858	'a549'	'Human cells'	-2.88989	'Lanone et al. Particle and Fibre Toxicology 2009, 6:22'
'CuO'	79.545	45.4	'24 h'	'MTT assay'	'IC50'	3.89	4.89031e-05	'THP-1'	'Human cells'	-4.31066	'Lanone et al. Particle and Fibre Toxicology 2009, 6:14'
'CuO'	79.545	45.4	'24 h'	'MTT assay'	'IC50'	31.07	0.000390597	'THP-1'	'Human cells'	-3.40827	'Lanone et al. Particle and Fibre Toxicology 2009, 6:14'
'CuO'	79.545	45.4	'24 h'	'Neutral Red assay.'	'IC50'	12.38	0.000155635	'THP-1'	'Human cells'	-3.80789	'Lanone et al. Particle and Fibre Toxicology 2009, 6:29'
'CuO'	79.545	48	'24 h'	'MTT assay'	'ec50'	100	0.00125715	'A549'	'Human cells'	-2.90061	'Horie et al. Metallomics, 2012, 4, 350–360'
'CuO'	79.545	48	'24 h'	'MTT assay'	'ec50'	100	0.00125715	'Hacat'	'Human cells'	-2.90061	'Horie et al. Metallomics, 2012, 4, 350–360'
'CuO'	80	50.24	'24 h'	'Cytotoxicity (MTS)'	'ec50 (in SFM medium)'	5	6.25e-05	'A549 cells'	'Human cells'	-4.20412	'Areecheewakul, et al. NanoImpact 18 (2020) 100214'
'CuO'	80	50.24	'24 h'	'Cytotoxicity (MTS)'	'ec50 (in SCM medium)'	50	0.000625	'A549 cells'	'Human cells'	-3.20412	'Areecheewakul, et al. NanoImpact 18 (2020) 100214'
'CuO'	80	50.24	'24 h'	'Cytotoxicity (PI staining)'	'ec50 (in SCM medium)'	7.5	9.375e-05	'A549 cells'	'Human cells'	-4.02803	'Areecheewakul, et al. NanoImpact 18 (2020) 100214'
'CuO'	80	50.24	'24 h'	'Cytotoxicity (PI staining)'	'ec50 (in SFM medium)'	75	0.0009375	'A549 cells'	'Human cells'	-3.02803	'Areecheewakul, et al. NanoImpact 18 (2020) 100214'
'CuO'	79.545	NaN	'36 h'	'resazurin fluorescence assay'	'ec50'	32.1	0.000403545	'A549'	'Human cells'	-3.39411	'Titma et al. Cytotechnology. 2016;68(6):2363-2377'
'CuO'	79.545	NaN	'108'	'resazurin fluorescence assay'	'ec50'	36.2	0.000455088	'A549'	'Human cells'	-3.3419	'Titma et al. Cytotechnology. 2016;68(6):2363-2377'
'CuO'	79.545	NaN	'216'	'resazurin fluorescence assay'	'ec50'	37.2	0.00046766	'A549'	'Human cells'	-3.33007	'Titma et al. Cytotechnology. 2016;68(6):2363-2377'
'CuO'	79.545	NaN	'60 h'	'resazurin fluorescence assay'	'ec50'	37.4	0.000470174	'A549'	'Human cells'	-3.32774	'Titma et al. Cytotechnology. 2016;68(6):2363-2377'
'CuO'	79.545	NaN	'12 h'	'resazurin fluorescence assay'	'ec50'	38.2	0.000480231	'A549'	'Human cells'	-3.31855	'Titma et al. Cytotechnology. 2016;68(6):2363-2377'
'CuO'	79.545	NaN	'60 h'	'resazurin fluorescence assay'	'ec50'	30.3	0.000380916	'Caco2'	'Human cells'	-3.41917	'Titma et al. Cytotechnology. 2016;68(6):2363-2377'
'CuO'	79.545	NaN	'108'	'resazurin fluorescence assay'	'ec50'	31.5	0.000396002	'Caco2'	'Human cells'	-3.4023	'Titma et al. Cytotechnology. 2016;68(6):2363-2377'
'CuO'	79.545	NaN	'216'	'resazurin fluorescence assay'	'ec50'	37	0.000465146	'Caco2'	'Human cells'	-3.33241	'Titma et al. Cytotechnology. 2016;68(6):2363-2377'
'CuO'	79.545	NaN	'24 h'	'resazurin fluorescence assay'	'ec50'	117.2	0.00147338	'Caco2'	'Human cells'	-2.83169	'Titma et al. Cytotechnology. 2016;68(6):2363-2377'
'CuO'	79.545	NaN	'24 h'	'aBlue'	'IC50'	30	0.000377145	'A549'	'Human cells'	-3.42349	'Seiffert et al., 2012,Chem. Res. Toxicol., 25, 140–152'
'CuO'	79.545	NaN	'24 h'	'Impedance'	'IC50'	30	0.000377145	'A549'	'Human cells'	-3.42349	'Seiffert et al., 2012,Chem. Res. Toxicol., 25, 140–152'
'CuO'	79.545	NaN	'24 h'	'MTT'	'IC50'	30	0.000377145	'A549'	'Human cells'	-3.42349	'Seiffert et al., 2012,Chem. Res. Toxicol., 25, 140–152'
'CuO'	79.545	NaN	'24 h'	'NRU assay'	'IC50'	30	0.000377145	'A549'	'Human cells'	-3.42349	'Seiffert et al., 2012,Chem. Res. Toxicol., 25, 140–152'
'CuO'	79.545	NaN	'24 h'	'WST-1'	'IC50'	30	0.000377145	'A549'	'Human cells'	-3.42349	'Seiffert et al., 2012,Chem. Res. Toxicol., 25, 140–152'
'CuO'	79.545	NaN	'24 h'	'Cell viability'	'EC50'	5	6.28575e-05	'BEAS-2B'	'Human cells'	-4.20164	'Huang et al. Materials 2010, 3, 4842-4859;'
'Fe2O3'	160	20.93	'24 h'	'CCK-8 cytotoxicity assay'	'EC50'	651.808	0.0040738	'A549 cells'	'Human cells'	-2.39	'Cao et al. Green Chem., 2020,22, 3512-3521'
'Fe2O3'	160	32	'24 h'	'CytoTox-Glo Cytotoxicity Assay'	'LC50'	1483	0.00926875	'Hacat cells'	'Human cells'	-2.03298	'Gajewicz et al. Nanotoxicology, 2015;9(3):313-25'
'Fe2O3'	160	39	'24 h'	'MTT assay'	'ec50'	1000	0.00625	'A549'	'Human cells'	-2.20412	'Horie et al. Metallomics, 2012, 4, 350–360'
'Fe2O3'	160	39	'24 h'	'MTT assay'	'ec50'	1000	0.00625	'Hacat'	'Human cells'	-2.20412	'Horie et al. Metallomics, 2012, 4, 350–360'
'Fe2O3'	160	100	'24 h'	'WST-1 assay'	'IC50'	698	0.0043625	'HEK293'	'Human cells'	-2.36026	'Dua et al., 2011,Bull. Korean Chem. Soc. Vol. 32, No. 6 2051'
'Fe2O3'	160	NaN	'24 h'	'Cellular proliferation colorimetric assay'	'LD 50'	1000	0.00625	'A549'	'Human cells'	-2.20412	'Lozano et al 2011 J. Phys.: Conf. Ser. 304 012046'
'Fe2O3'	160	NaN	'48 h'	'Cellular proliferation colorimetric assay'	'LD 50'	1000	0.00625	'A549'	'Human cells'	-2.20412	'Lozano et al 2011 J. Phys.: Conf. Ser. 304 012046'
'Fe2O3'	160	NaN	'24 h'	'Cellular proliferation colorimetric assay'	'LD 50'	1000	0.00625	'HeLa cells'	'Human cells'	-2.20412	'Lozano et al 2011 J. Phys.: Conf. Ser. 304 012046'
'Fe2O3'	160	NaN	'48 h'	'Cellular proliferation colorimetric assay'	'LD 50'	1000	0.00625	'HeLa cells'	'Human cells'	-2.20412	'Lozano et al 2011 J. Phys.: Conf. Ser. 304 012046'
'Fe2O3'	160	NaN	'24 h'	'Cellular proliferation colorimetric assay'	'LD 50'	1000	0.00625	'NCl H460'	'Human cells'	-2.20412	'Lozano et al 2011 J. Phys.: Conf. Ser. 304 012046'
'Fe2O3'	160	NaN	'24 h'	'Cellular proliferation colorimetric assay'	'LD 50'	1000	0.00625	'SK- MES 1'	'Human cells'	-2.20412	'Lozano et al 2011 J. Phys.: Conf. Ser. 304 012046'
'Fe2O3'	160	NaN	'48 h'	'Cellular proliferation colorimetric assay'	'LD 50'	1000	0.00625	'SK- MES 1'	'Human cells'	-2.20412	'Lozano et al 2011 J. Phys.: Conf. Ser. 304 012046'
'Fe2O3'	160	12.3	'24 h'	'ATP assay'	'EC50'	NaN	NaN	'BEAS-2B cells, ATP assay'	'Human cells'	NaN	'Zhang et al. ACS Nano 2012, 6, 5, 4349–4368'
'Fe3o4'	232	9	'24 H'	'CCK-8'	'EC50'	NaN	NaN	'SK HEP 1'	'Human cells'	NaN	'Xie et al. International journal of Nanomedicine, 11, 2016, 3557—3570'
'Fe3o4'	232	6	'24 H'	'CCK-8'	'EC50'	NaN	NaN	'Hep 3B'	'Human cells'	NaN	'Xie et al. International journal of Nanomedicine, 11, 2016, 3557—3570'
'Fe3o4'	232	9	'24 H'	'CCK-8'	'EC50'	NaN	NaN	'Hep 3B'	'Human cells'	NaN	'Xie et al. International journal of Nanomedicine, 11, 2016, 3557—3570'
'Fe3o4'	232	14	'24 H'	'CCK-8'	'EC50'	NaN	NaN	'Hep 3B'	'Human cells'	NaN	'Xie et al. International journal of Nanomedicine, 11, 2016, 3557—3570'
'Gd2O3'	362	72.76	'24 h'	'CCK-8 cytotoxicity assay'	'EC50'	952.157	0.00263027	'A549 cells'	'Human cells'	-2.58	'Cao et al. Green Chem., 2020,22, 3512-3521'
'Gd2O3'	362	NaN	'24 h'	'MTT assay'	'ec50'	NaN	NaN	'A549'	'Human cells'	NaN	'Horie et al. Metallomics, 2012, 4, 350–360'
'In2O3'	278	29.8	'24 h'	'CytoTox-Glo Cytotoxicity Assay'	'LC50'	332	0.00119424	'Hacat cells'	'Human cells'	-2.92291	'Gajewicz et al. Nanotoxicology, 2015;9(3):313-25'
'In2O3'	278	77.15	'24 h'	'CCK-8 cytotoxicity assay'	'EC50'	326.622	0.0011749	'A549 cells'	'Human cells'	-2.93	'Cao et al. Green Chem., 2020,22, 3512-3521'
'La2O3'	326	75.81	'24 h'	'CCK-8 cytotoxicity assay'	'EC50'	450.005	0.00138038	'A549 cells'	'Human cells'	-2.86	'Cao et al. Green Chem., 2020,22, 3512-3521'
'La2O3'	326	45.6	'24 h'	'CytoTox-Glo Cytotoxicity Assay'	'LC50'	443	0.0013589	'Hacat cells'	'Human cells'	-2.86681	'Gajewicz et al. Nanotoxicology, 2015;9(3):313-25'
'La2O3'	326	NaN	'24 h'	'MTT assay'	'ec50'	NaN	NaN	'A549'	'Human cells'	NaN	'Horie et al. Metallomics, 2012, 4, 350–360'
'La2O3'	326	NaN	'24 h'	'MTT assay'	'ec50'	NaN	NaN	'Hacat'	'Human cells'	NaN	'Horie et al. Metallomics, 2012, 4, 350–360'
'La2O3'	326	103.6	'48h'	'Cytotoxicity assay'	'LD50'	50.58	0.000155153	'a549'	'Human cells'	-3.80924	'Lim et al.,Toxicol. Res.,(2015) Vol. 31, No. 2, pp. 181-189
'MgO'	40	20	'24 h'	'MTT assay'	'ec50'	1000	0.025	'Hacat'	'Human cells'	-1.60206	'Horie et al. Metallomics, 2012, 4, 350–360'
'MgO'	40	23.8	'24 h'	'Cytotoxicity (MTS)'	'ec50 (in SFM medium)'	NaN	NaN	'A549 cells'	'Human cells'	NaN	'Areecheewakul, et al. NanoImpact 18 (2020) 100214'
'MgO'	40	23.8	'24 h'	'Cytotoxicity (MTS)'	'ec50 (in SCM medium)'	NaN	NaN	'A549 cells'	'Human cells'	NaN	'Areecheewakul, et al. NanoImpact 18 (2020) 100214'
'MgO'	40	23.8	'24 h'	'Cytotoxicity (PI staining)'	'ec50 (in SCM medium)'	150	0.00375	'A549 cells'	'Human cells'	-2.42597	'Areecheewakul, et al. NanoImpact 18 (2020) 100214'
'MgO'	40	NaN	'24 h'	'NRU assay'	'IC50'	NaN	NaN	'Caco2'	'Human cells'	NaN	'Ivansk et al. Curr Top Med Chem., 2015;15(18):1914-29'
'Mn2O3'	158	36.87	'24 h'	'CCK-8 cytotoxicity assay'	'EC50'	22.3181	0.000141254	'A549 cells'	'Human cells'	-3.85	'Cao et al. Green Chem., 2020,22, 3512-3521'
'Mn2O3'	158	51.5	'24 h'	'ATP assay'	'EC50'	13.1826	8.3434e-05	'BEAS-2B cells, ATP assay'	'Human cells'	-4.07866	'Zhang et al. ACS Nano 2012, 6, 5, 4349–4368'
'Mn2O3'	158	51.5	'24 h'	'MTS assay'	'EC50'	11.2202	7.10138e-05	'BEAS-2B cells, MTS assay'	'Human cells'	-4.14866	'Zhang et al. ACS Nano 2012, 6, 5, 4349–4368'
'Mn2O3'	158	NaN	'24 h'	'Cell viability'	'EC50'	50	0.000316456	'BEAS-2B'	'Human cells'	-3.49969	'Huang et al. Materials 2010, 3, 4842-4859;'
'Mn3O4'	229	14.9	'24 h'	'NRU assay'	'IC50'	136.2	0.00059476	'A549'	'Human cells'	-3.22566	'Ivansk et al. Curr Top Med Chem., 2015;15(18):1914-29'
'Mn3o4'	229	NaN	'108'	'resazurin fluorescence assay'	'ec50'	31.8	0.000138865	'A549'	'Human cells'	-3.85741	'Titma et al. Cytotechnology. 2016;68(6):2363-2377'
'Mn3o4'	229	NaN	'60 h'	'resazurin fluorescence assay'	'ec50'	39.2	0.000171179	'A549'	'Human cells'	-3.76655	'Titma et al. Cytotechnology. 2016;68(6):2363-2377'
'Mn3o4'	229	NaN	'216'	'resazurin fluorescence assay'	'ec50'	47.1	0.000205677	'A549'	'Human cells'	-3.68681	'Titma et al. Cytotechnology. 2016;68(6):2363-2377'
'Mn3o4'	229	NaN	'108'	'resazurin fluorescence assay'	'ec50'	20.7	9.0393e-05	'Caco2'	'Human cells'	-4.04387	'Titma et al. Cytotechnology. 2016;68(6):2363-2377'
'Mn3o4'	229	NaN	'216'	'resazurin fluorescence assay'	'ec50'	28.9	0.000126201	'Caco2'	'Human cells'	-3.89894	'Titma et al. Cytotechnology. 2016;68(6):2363-2377'
'Mn3o4'	229	NaN	'60 h'	'resazurin fluorescence assay'	'ec50'	33.2	0.000144978	'Caco2'	'Human cells'	-3.8387	'Titma et al. Cytotechnology. 2016;68(6):2363-2377'
MoO3	144	100	24 h	MTT assay	ec50	1000	0.00694444	A549	Human cells	-2.15836	Horie et al. Metallomics, 2012, 4, 350–360
MoO3	144	100	24 h	MTT assay	ec50	1000	0.00694444	Hacat	Human cells	-2.15836	Horie et al. Metallomics, 2012, 4, 350–360
'Ni'	59	NaN	'24 h'	'Neutral Red assay.'	'IC50'	1032	0.0174915	'a549'	'Human cells'	-1.75717	'Lanone et al. Particle and Fibre Toxicology 2009, 6:28'
'Ni'	59	NaN	'24 h'	'Neutral Red assay.'	'IC50'	509.9	0.00864237	'a549'	'Human cells'	-2.06337	'Lanone et al. Particle and Fibre Toxicology 2009, 6:29'
'Ni'	59	NaN	'24 h'	'MTT assay'	'IC50'	79.46	0.00134678	'THP-1'	'Human cells'	-2.8707	'Lanone et al. Particle and Fibre Toxicology 2009, 6:14'
'Ni'	59	NaN	'24 h'	'Neutral Red assay.'	'IC50'	141	0.00238983	'THP-1'	'Human cells'	-2.62163	'Lanone et al. Particle and Fibre Toxicology 2009, 6:29'
'Ni2O3'	165	140.6	'24 h'	'MTS assay'	'EC50'	331.131	0.00200686	'BEAS-2B cells, MTS assay'	'Human cells'	-2.69748	'Zhang et al. ACS Nano 2012, 6, 5, 4349–4368'
'NiO'	75	10.96	'24 h'	'CCK-8 cytotoxicity assay'	'EC50'	90.1698	0.00120226	'A549 cells'	'Human cells'	-2.92	'Cao et al. Green Chem., 2020,22, 3512-3521'
'NiO'	75	13.1	'24 h'	'MTS assay'	'EC50'	416869	5.55826	'BEAS-2B cells, MTS assay'	'Human cells'	0.744939	'Zhang et al. ACS Nano 2012, 6, 5, 4349–4368'
'NiO'	75	20	'24 h'	'CytoTox-Glo Cytotoxicity Assay'	'LC50'	242	0.00322667	'Hacat cells'	'Human cells'	-2.49125	'Gajewicz et al. Nanotoxicology, 2015;9(3):313-25'
'NiO'	75	48.9	'24 h'	'MTT assay'	'IC50'	994.9	0.0132653	'a549'	'Human cells'	-1.87728	'Lanone et al. Particle and Fibre Toxicology 2009, 6:14'
'NiO'	75	48.9	'24 h'	'MTT assay'	'IC50'	23.31	0.0003108	'THP-1'	'Human cells'	-3.50752	'Lanone et al. Particle and Fibre Toxicology 2009, 6:14'
'NiO'	75	48.9	'24 h'	'MTT assay'	'IC50'	1613	0.0215067	'THP-1'	'Human cells'	-1.66743	'Lanone et al. Particle and Fibre Toxicology 2009, 6:14'
'NiO'	75	48.9	'24 h'	'Neutral Red assay.'	'IC50'	2.36	3.14667e-05	'THP-1'	'Human cells'	-4.50215	'Lanone et al. Particle and Fibre Toxicology 2009, 6:29'
'NiO'	75	NaN	'24 h'	'Cell viability'	'EC50'	25	0.000333333	'BEAS-2B'	'Human cells'	-3.47712	'Huang et al. Materials 2010, 3, 4842-4859;'
'NiO'	75	13.1	'24 h'	'ATP assay'	'EC50'	NaN	NaN	'BEAS-2B cells, MTS assay'	'Human cells'	NaN	'Zhang et al. ACS Nano 2012, 6, 5, 4349–4368'
'Sb2O3'	292	20.8	'24 h'	'NRU assay'	'IC50'	79.9	0.00027363	'A549'	'Human cells'	-3.56284	'Ivansk et al. Curr Top Med Chem., 2015;15(18):1914-29'
'Sb2O3'	292	20.8	'24 h'	'NRU assay'	'IC50'	57.2	0.00019589	'Caco2'	'Human cells'	-3.70799	'Ivansk et al. Curr Top Med Chem., 2015;15(18):1914-29'
'Sb2O3'	292	107.91	'24 h'	'CCK-8 cytotoxicity assay'	'EC50'	422.068	0.00144544	'A549 cells'	'Human cells'	-2.84	'Cao et al. Green Chem., 2020,22, 3512-3521'
'Sb2O3'	292	NaN	'216'	'resazurin fluorescence assay'	'ec50'	22	7.53425e-05	'A549'	'Human cells'	-4.12296	'Titma et al. Cytotechnology. 2016;68(6):2363-2377'
'Sb2O3'	292	NaN	'108'	'resazurin fluorescence assay'	'ec50'	38.5	0.000131849	'A549'	'Human cells'	-3.87992	'Titma et al. Cytotechnology. 2016;68(6):2363-2377'
'Sb2O3'	292	NaN	'60 h'	'resazurin fluorescence assay'	'ec50'	59.1	0.000202397	'A549'	'Human cells'	-3.6938	'Titma et al. Cytotechnology. 2016;68(6):2363-2377'
'Sb2O3'	292	NaN	'36 h'	'resazurin fluorescence assay'	'ec50'	84.6	0.000289726	'A549'	'Human cells'	-3.53801	'Titma et al. Cytotechnology. 2016;68(6):2363-2377'
'Sb2O3'	292	NaN	'108'	'resazurin fluorescence assay'	'ec50'	47.4	0.000162329	'Caco2'	'Human cells'	-3.7896	'Titma et al. Cytotechnology. 2016;68(6):2363-2377'
'Sb2O3'	292	NaN	'216'	'resazurin fluorescence assay'	'ec50'	48.2	0.000165068	'Caco2'	'Human cells'	-3.78234	'Titma et al. Cytotechnology. 2016;68(6):2363-2377'
'Sb2O3'	292	NaN	'36 h'	'resazurin fluorescence assay'	'ec50'	66.8	0.000228767	'Caco2'	'Human cells'	-3.64061	'Titma et al. Cytotechnology. 2016;68(6):2363-2377'
'Sb2O3'	292	NaN	'48 h'	'TEER assay'	'ec50'	10	3.42466e-05	'Caco2'	'Human cells'	-4.46538	'Titma et al. Cytotechnology. 2016;68(6):2363-2377'
'Sb2O3'	292	NaN	'72'	'TEER assay'	'ec50'	10	3.42466e-05	'Caco2'	'Human cells'	-4.46538	'Titma et al. Cytotechnology. 2016;68(6):2363-2377'
'Sb2O3'	292	NaN	'24 h'	'CytoTox-Glo Cytotoxicity Assay'	'LC50'	1429	0.00489384	'Hacat cells'	'Human cells'	-2.31035	'Gajewicz et al. Nanotoxicology, 2015;9(3):313-25'
'SiO2'	60	12	'24 h'	'NRU assay'	'IC50'	NaN	NaN	'A549'	'Human cells'	NaN	'Ivansk et al. Curr Top Med Chem., 2015;15(18):1914-29'
'SiO2'	60	12	'24 h'	'NRU assay'	'IC50'	NaN	NaN	'Caco2'	'Human cells'	NaN	'Ivansk et al. Curr Top Med Chem., 2015;15(18):1914-29'
'SiO2'	60	13.5	'24 h'	'ATP assay'	'EC50'	200	0.00333333	'BEAS-2B cells, ATP assay'	'Human cells'	-2.47712	'Zhang et al. ACS Nano 2012, 6, 5, 4349–4368'
'SiO2'	60	15	'24 h'	'CytoTox-Glo Cytotoxicity Assay'	'LC50'	453	0.00755	'Hacat cells'	'Human cells'	-2.12205	'Gajewicz et al. Nanotoxicology, 2015;9(3):313-25'
'SiO2'	60	212	'24 h'	'Membrane integrity'	'ec50'	NaN	NaN	'human mesenchymal stem cells'	'Human cells'	NaN	'Bondarenko et al. Nanotoxicology, 2016; 10(9): 1229–1242'
'SiO2'	60	212	'24 h'	'MTT assay'	'ec50'	NaN	NaN	'human mesenchymal stem cells (MTT)'	'Human cells'	NaN	'Bondarenko et al. Nanotoxicology, 2016; 10(9): 1229–1242'
'SnO2'	151	21	'24 h'	'MTT assay'	'ec50'	1000	0.00662252	'A549'	'Human cells'	-2.17898	'Horie et al. Metallomics, 2012, 4, 350–360'
'SnO2'	151	21	'24 h'	'MTT assay'	'ec50'	1000	0.00662252	'Hacat'	'Human cells'	-2.17898	'Horie et al. Metallomics, 2012, 4, 350–360'
'SnO2'	151	26.85	'24 h'	'CCK-8 cytotoxicity assay'	'EC50'	5482.48	0.0363078	'A549 cells'	'Human cells'	-1.44	'Cao et al. Green Chem., 2020,22, 3512-3521'
'SnO2'	151	33	'24 h'	'MTT assay'	'IC50'	174	0.00115232	'THP-1'	'Human cells'	-2.93843	'Lanone et al. Particle and Fibre Toxicology 2009, 6:14'
'SnO2'	151	33	'24 h'	'MTT assay'	'IC50'	3.33	2.2053e-05	'THP-1'	'Human cells'	-4.65653	'Lanone et al. Particle and Fibre Toxicology 2009, 6:14'
'SnO2'	151	33	'24 h'	'Neutral Red assay.'	'IC50'	562.1	0.00372252	'THP-1'	'Human cells'	-2.42916	'Lanone et al. Particle and Fibre Toxicology 2009, 6:29'
'SnO2'	151	46.1	'24 h'	'CytoTox-Glo Cytotoxicity Assay'	'LC50'	322	0.00213245	'Hacat cells'	'Human cells'	-2.67112	'Gajewicz et al. Nanotoxicology, 2015;9(3):313-25'
'SnO2'	151	62.4	'24 h'	'MTS assay'	'EC50'	NaN	NaN	'BEAS-2B cells, MTS assay'	'Human cells'	NaN	'Zhang et al. ACS Nano 2012, 6, 5, 4349–4368'
'TiO2'	80	5	'24 h'	'Membrane integrity'	'ec50'	NaN	NaN	'human mesenchymal stem cells'	'Human cells'	NaN	'Bondarenko et al. Nanotoxicology, 2016; 10(9): 1229–1242'
'TiO2'	80	5	'24 h'	'MTT assay'	'ec50'	NaN	NaN	'human mesenchymal stem cells (MTT)'	'Human cells'	NaN	'Bondarenko et al. Nanotoxicology, 2016; 10(9): 1229–1242'
'TiO2'	80	12.2	'24 h'	'MTT assay'	'IC50'	432	0.0054	'THP-1'	'Human cells'	-2.26761	'Lanone et al. Particle and Fibre Toxicology 2009, 6:14'
'TiO2'	80	12.2	'24 h'	'MTT assay'	'IC50'	845.2	0.010565	'THP-1'	'Human cells'	-1.97613	'Lanone et al. Particle and Fibre Toxicology 2009, 6:14'
'TiO2'	80	12.2	'24 h'	'Neutral Red assay.'	'IC50'	95.97	0.00119962	'THP-1'	'Human cells'	-2.92095	'Lanone et al. Particle and Fibre Toxicology 2009, 6:29'
'TiO2'	80	12.2	'24 h'	'Neutral Red assay.'	'IC50'	1062	0.013275	'THP-1'	'Human cells'	-1.87697	'Lanone et al. Particle and Fibre Toxicology 2009, 6:29'
'TiO2'	80	12.2	'24 h'	'Neutral Red assay.'	'IC50'	220.5	0.00275625	'THP-1'	'Human cells'	-2.55968	'Lanone et al. Particle and Fibre Toxicology 2009, 6:29'
'TiO2'	80	12.6	'24 h'	'ATP assay'	'EC50'	NaN	NaN	'BEAS-2B cells, ATP assay'	'Human cells'	NaN	'Zhang et al. ACS Nano 2012, 6, 5, 4349–4368'
'TiO2'	80	12.6	'24 h'	'MTS assay'	'EC50'	NaN	NaN	'BEAS-2B cells, MTS assay'	'Human cells'	NaN	'Zhang et al. ACS Nano 2012, 6, 5, 4349–4368'
'TiO2'	80	14.2	'24 h'	'NRU assay'	'IC50'	NaN	NaN	'Caco2'	'Human cells'	NaN	'Ivansk et al. Curr Top Med Chem., 2015;15(18):1914-29'
'TiO2'	80	39.9	'24 h'	'MTS assay'	'EC50'	4000	0.004	'A549 CELLS'	'Human cells'	-2.39794	'Jeong et al. Front Pharmacol. 2018 22;9:15.'
'TiO2'	80	39.9	'24 h'	'MTS assay'	'EC50'	4000	0.004	'THP-1 CELLS'	'Human cells'	-2.39794	'Jeong et al. Front Pharmacol. 2018 22;9:15.'
'TiO2'	80	42.3	'24 h'	'CytoTox-Glo Cytotoxicity Assay'	'LC50'	1389	0.0173625	'Hacat cells'	'Human cells'	-1.76039	'Gajewicz et al. Nanotoxicology, 2015;9(3):313-25'
'TiO2'	80	113.4	'24 h'	'Cytotoxicity (MTS)'	'ec50 (in SCM medium)'	NaN	NaN	'A549 cells'	'Human cells'	NaN	'Areecheewakul, et al. NanoImpact 18 (2020) 100214'
'TiO2'	80	113.4	'24 h'	'Cytotoxicity (PI staining)'	'ec50 (in SFM medium)'	NaN	NaN	'A549 cells'	'Human cells'	NaN	'Areecheewakul, et al. NanoImpact 18 (2020) 100214'
'TiO2'	80	113.4	'24 h'	'Cytotoxicity (PI staining)'	'ec50 (in SCM medium)'	NaN	NaN	'A549 cells'	'Human cells'	NaN	'Areecheewakul, et al. NanoImpact 18 (2020) 100214'
'TiO2'	80	NaN	'24 h'	'Cellular proliferation colorimetric assay'	'LD 50'	1000	0.0125	'A549'	'Human cells'	-1.90309	'Lozano et al 2011 J. Phys.: Conf. Ser. 304 012046'
'TiO2'	80	NaN	'36 h'	'resazurin fluorescence assay'	'ec50'	NaN	NaN	'A549'	'Human cells'	NaN	'Titma et al. Cytotechnology. 2016;68(6):2363-2377'
'TiO2'	80	NaN	'24 h'	'resazurin fluorescence assay'	'ec50'	NaN	NaN	'A549'	'Human cells'	NaN	'Titma et al. Cytotechnology. 2016;68(6):2363-2377'
'TiO2'	80	NaN	'60 h'	'resazurin fluorescence assay'	'ec50'	NaN	NaN	'A549'	'Human cells'	NaN	'Titma et al. Cytotechnology. 2016;68(6):2363-2377'
'TiO2'	80	NaN	'108'	'resazurin fluorescence assay'	'ec50'	NaN	NaN	'A549'	'Human cells'	NaN	'Titma et al. Cytotechnology. 2016;68(6):2363-2377'
'TiO2'	80	NaN	'216'	'resazurin fluorescence assay'	'ec50'	NaN	NaN	'A549'	'Human cells'	NaN	'Titma et al. Cytotechnology. 2016;68(6):2363-2377'
'TiO2'	80	NaN	'12 h'	'resazurin fluorescence assay'	'ec50'	NaN	NaN	'A549'	'Human cells'	NaN	'Titma et al. Cytotechnology. 2016;68(6):2363-2377'
'TiO2'	80	NaN	'108'	'resazurin fluorescence assay'	'ec50'	NaN	NaN	'A549'	'Human cells'	NaN	'Titma et al. Cytotechnology. 2016;68(6):2363-2377'
'TiO2'	80	NaN	'216'	'resazurin fluorescence assay'	'ec50'	NaN	NaN	'A549'	'Human cells'	NaN	'Titma et al. Cytotechnology. 2016;68(6):2363-2377'
'TiO2'	80	NaN	'12 h'	'resazurin fluorescence assay'	'ec50'	NaN	NaN	'Caco2'	'Human cells'	NaN	'Titma et al. Cytotechnology. 2016;68(6):2363-2377'
'TiO2'	80	NaN	'60 h'	'resazurin fluorescence assay'	'ec50'	NaN	NaN	'Caco2'	'Human cells'	NaN	'Titma et al. Cytotechnology. 2016;68(6):2363-2377'
'TiO2'	80	NaN	'108'	'resazurin fluorescence assay'	'ec50'	NaN	NaN	'Caco2'	'Human cells'	NaN	'Titma et al. Cytotechnology. 2016;68(6):2363-2377'
'TiO2'	80	NaN	'36 h'	'resazurin fluorescence assay'	'ec50'	NaN	NaN	'Caco2'	'Human cells'	NaN	'Titma et al. Cytotechnology. 2016;68(6):2363-2377'
'TiO2'	80	NaN	'12 h'	'resazurin fluorescence assay'	'ec50'	NaN	NaN	'Caco2'	'Human cells'	NaN	'Titma et al. Cytotechnology. 2016;68(6):2363-2377'
'TiO2'	80	NaN	'24 h'	'resazurin fluorescence assay'	'ec50'	NaN	NaN	'Caco2'	'Human cells'	NaN	'Titma et al. Cytotechnology. 2016;68(6):2363-2377'
'TiO2'	80	NaN	'60 h'	'resazurin fluorescence assay'	'ec50'	NaN	NaN	'Caco2'	'Human cells'	NaN	'Titma et al. Cytotechnology. 2016;68(6):2363-2377'
'TiO2'	80	NaN	'108'	'resazurin fluorescence assay'	'ec50'	NaN	NaN	'Caco2'	'Human cells'	NaN	'Titma et al. Cytotechnology. 2016;68(6):2363-2377'
'TiO2'	80	NaN	'216'	'resazurin fluorescence assay'	'ec50'	NaN	NaN	'Caco2'	'Human cells'	NaN	'Titma et al. Cytotechnology. 2016;68(6):2363-2377'
'TiO2'	80	NaN	'24 h'	'Cellular proliferation colorimetric assay'	'LD 50'	1000	0.0125	'HeLa cells'	'Human cells'	-1.90309	'Lozano et al 2011 J. Phys.: Conf. Ser. 304 012046'
'TiO2'	80	NaN	'48 h'	'Cellular proliferation colorimetric assay'	'LD 50'	1000	0.0125	'HeLa cells'	'Human cells'	-1.90309	'Lozano et al 2011 J. Phys.: Conf. Ser. 304 012046'
'TiO2'	80	NaN	'24 h'	'Cellular proliferation colorimetric assay'	'LD 50'	1000	0.0125	'NCl H460'	'Human cells'	-1.90309	'Lozano et al 2011 J. Phys.: Conf. Ser. 304 012046'
'TiO2'	80	NaN	'48 h'	'Cellular proliferation colorimetric assay'	'LD 50'	1000	0.0125	'NCl H460'	'Human cells'	-1.90309	'Lozano et al 2011 J. Phys.: Conf. Ser. 304 012046'
'TiO2'	80	NaN	'48 h'	'Cellular proliferation colorimetric assay'	'LD 50'	1000	0.0125	'SK- MES 1'	'Human cells'	-1.90309	'Lozano et al 2011 J. Phys.: Conf. Ser. 304 012046'
'TiO2'	80	NaN	'24 h'	'Impedance'	'IC50'	NaN	NaN	'A549'	'Human cells'	NaN	'Seiffert et al., 2012,Chem. Res. Toxicol., 25, 140–152'
'TiO2'	80	NaN	'24 h'	'WST-1'	'IC50'	NaN	NaN	'A549'	'Human cells'	NaN	'Seiffert et al., 2012,Chem. Res. Toxicol., 25, 140–152'
'TiO2'	80	NaN	'24 h'	'aBlue'	'IC50'	NaN	NaN	'A549'	'Human cells'	NaN	'Seiffert et al., 2012,Chem. Res. Toxicol., 25, 140–152'
'TiO2'	80	NaN	'24 h'	'MTT'	'IC50'	NaN	NaN	'A549'	'Human cells'	NaN	'Seiffert et al., 2012,Chem. Res. Toxicol., 25, 140–152'
'TiO2'	80	NaN	'24 h'	'NRU assay'	'IC50'	NaN	NaN	'A549'	'Human cells'	NaN	'Seiffert et al., 2012,Chem. Res. Toxicol., 25, 140–152'
'TiO2'	80	NaN	'24 h'	'WST-1'	'IC50'	NaN	NaN	'A549'	'Human cells'	NaN	'Seiffert et al., 2012,Chem. Res. Toxicol., 25, 140–152'
'TiO2'	80	NaN	'24 h'	'Cell viability'	'EC50'	NaN	NaN	'BEAS-2B'	'Human cells'	NaN	'Huang et al. Materials 2010, 3, 4842-4859;'
'TiO2'	80	NaN	'24 h'	'MTT assay'	'ec50'	1000	0.0125	'A549'	'Human cells'	-1.90309	'Horie et al. Metallomics, 2012, 4, 350–360'
'TiO2'	80	NaN	'24 h'	'MTT assay'	'ec50'	1000	0.0125	'Hacat'	'Human cells'	-1.90309	'Horie et al. Metallomics, 2012, 4, 350–360'
'TiO2'	80	NaN	'24 h'	'MTT assay'	'ec50'	1000	0.0125	'A549'	'Human cells'	-1.90309	'Horie et al. Metallomics, 2012, 4, 350–360'
'TiO2'	80	NaN	'24 h'	'MTT assay'	'ec50'	1000	0.0125	'A549'	'Human cells'	-1.90309	'Horie et al. Metallomics, 2012, 4, 350–360'
'TiO2'	80	NaN	'24 h'	'MTT assay'	'ec50'	1000	0.0125	'Hacat'	'Human cells'	-1.90309	'Horie et al. Metallomics, 2012, 4, 350–360'
'V2O3'	150	NaN	'24 h'	'CytoTox-Glo Cytotoxicity Assay'	'LC50'	855	0.0057	'Hacat cells'	'Human cells'	-2.24413	'Gajewicz et al. Nanotoxicology, 2015;9(3):313-25'
'V2O3'	150	NaN	'48 h'	'MTT Assay'	'eC50'	20	0.000133333	'a549'	'Human cells'	-3.87506	'Wörle-Knirsch et al., Environ. Sci. Technol. 2007, 41, 1, 331–336'
'WO3'	232	30	'24 h'	'MTT assay'	'ec50'	1000	0.00431034	'Hacat'	'Human cells'	-2.36549	'Horie et al. Metallomics, 2012, 4, 350–360'
'WO3'	232	40.08	'24 h'	'CCK-8 cytotoxicity assay'	'EC50'	1274.93	0.00549541	'A549 cells'	'Human cells'	-2.26	'Cao et al. Green Chem., 2020,22, 3512-3521'
'WO3'	232	NaN	'24 h'	'CytoTox-Glo Cytotoxicity Assay'	'LC50'	634	0.00273276	'Hacat cells'	'Human cells'	-2.5634	'Gajewicz et al. Nanotoxicology, 2015;9(3):313-25'
'Y2O3'	226	33	'24 h'	'MTT assay'	'ec50'	1000	0.00442478	'A549'	'Human cells'	-2.35411	'Horie et al. Metallomics, 2012, 4, 350–360'
'Y2O3'	226	33	'24 h'	'MTT assay'	'ec50'	1000	0.00442478	'Hacat'	'Human cells'	-2.35411	'Horie et al. Metallomics, 2012, 4, 350–360'
'Yb2O3'	394	99.85	'24 h'	'CCK-8 cytotoxicity assay'	'EC50'	556.54	0.00141254	'A549 cells'	'Human cells'	-2.85	'Cao et al. Green Chem., 2020,22, 3512-3521'
'ZnO'	81	13.6	'24 h'	'Membrane integrity'	'ec50'	1.9	2.34568e-05	'human mesenchymal stem cells'	'Human cells'	-4.62973	'Bondarenko et al. Nanotoxicology, 2016; 10(9): 1229–1242'
'ZnO'	81	13.6	'24 h'	'MTT assay'	'ec50'	16.3	0.000201235	'human mesenchymal stem cells (MTT)'	'Human cells'	-3.6963	'Bondarenko et al. Nanotoxicology, 2016; 10(9): 1229–1242'
'ZnO'	81	16.5	'24 h'	'MTS assay'	'EC50'	81	0.001	'A549 CELLS'	'Human cells'	-3	'Jeong et al. Front Pharmacol. 2018 22;9:15.'
'ZnO'	81	16.5	'24 h'	'MTS assay'	'EC50'	97.2	0.0012	'THP-1 CELLS'	'Human cells'	-2.92082	'Jeong et al. Front Pharmacol. 2018 22;9:15.'
'ZnO'	81	19.7	'24 h'	'NRU assay'	'IC50'	24.9	0.000307407	'A549'	'Human cells'	-3.51229	'Ivansk et al. Curr Top Med Chem., 2015;15(18):1914-29'
'ZnO'	81	19.7	'24 h'	'NRU assay'	'IC50'	30.2	0.00037284	'Caco2'	'Human cells'	-3.42848	'Ivansk et al. Curr Top Med Chem., 2015;15(18):1914-29'
'ZnO'	81	21	'24 h'	'MTT assay'	'ec50'	100	0.00123457	'A549'	'Human cells'	-2.90849	'Horie et al. Metallomics, 2012, 4, 350–360'
'ZnO'	81	21	'24 h'	'MTT assay'	'ec50'	100	0.00123457	'A549'	'Human cells'	-2.90849	'Horie et al. Metallomics, 2012, 4, 350–360'
'ZnO'	81	21	'24 h'	'MTT assay'	'ec50'	100	0.00123457	'Hacat'	'Human cells'	-2.90849	'Horie et al. Metallomics, 2012, 4, 350–360'
'ZnO'	81	21	'24 h'	'MTT assay'	'ec50'	100	0.00123457	'Hacat'	'Human cells'	-2.90849	'Horie et al. Metallomics, 2012, 4, 350–360'
'ZnO'	81	22.6	'24 h'	'ATP assay'	'EC50'	3.63078	4.48245e-05	'BEAS-2B cells, ATP assay'	'Human cells'	-4.34849	'Zhang et al. ACS Nano 2012, 6, 5, 4349–4368'
'ZnO'	81	22.6	'24 h'	'MTS assay'	'EC50'	5.24807	6.4791e-05	'BEAS-2B cells, MTS assay'	'Human cells'	-4.18849	'Zhang et al. ACS Nano 2012, 6, 5, 4349–4368'
'ZnO'	81	39.05	'24 h'	'CCK-8 cytotoxicity assay'	'EC50'	131.367	0.00162181	'A549 cells'	'Human cells'	-2.79	'Cao et al. Green Chem., 2020,22, 3512-3521'
'ZnO'	81	45.7	'24 h'	'Cytotoxicity (MTS)'	'ec50 (in SFM medium)'	50	0.000617284	'A549 cells'	'Human cells'	-3.20952	'Areecheewakul, et al. NanoImpact 18 (2020) 100214'
'ZnO'	81	45.7	'24 h'	'Cytotoxicity (PI staining)'	'ec50 (in SFM medium)'	7.5	9.25926e-05	'A549 cells'	'Human cells'	-4.03342	'Areecheewakul, et al. NanoImpact 18 (2020) 100214'
'ZnO'	81	45.7	'24 h'	'Cytotoxicity (PI staining)'	'ec50 (in SCM medium)'	75	0.000925926	'A549 cells'	'Human cells'	-3.03342	'Areecheewakul, et al. NanoImpact 18 (2020) 100214'
'ZnO'	81	53.6	'24 h'	'MTT assay'	'IC50'	34.31	0.00042358	'a549'	'Human cells'	-3.37306	'Lanone et al. Particle and Fibre Toxicology 2009, 6:14'
'ZnO'	81	53.6	'24 h'	'MTT assay'	'IC50'	66.17	0.000816914	'a549'	'Human cells'	-3.08782	'Lanone et al. Particle and Fibre Toxicology 2009, 6:14'
'ZnO'	81	53.6	'24 h'	'MTT assay'	'IC50'	1.66	2.04938e-05	'THP-1'	'Human cells'	-4.68838	'Lanone et al. Particle and Fibre Toxicology 2009, 6:14'
'ZnO'	81	53.6	'24 h'	'MTT assay'	'IC50'	4.05	5e-05	'THP-1'	'Human cells'	-4.30103	'Lanone et al. Particle and Fibre Toxicology 2009, 6:14'
'ZnO'	81	53.6	'24 h'	'Neutral Red assay.'	'IC50'	2.08	2.5679e-05	'THP-1'	'Human cells'	-4.59042	'Lanone et al. Particle and Fibre Toxicology 2009, 6:29'
'ZnO'	81	53.6	'24 h'	'Neutral Red assay.'	'IC50'	81.22	0.00100272	'THP-1'	'Human cells'	-2.99882	'Lanone et al. Particle and Fibre Toxicology 2009, 6:29'
'ZnO'	81	71	'24 h'	'CytoTox-Glo Cytotoxicity Assay'	'LC50'	39	0.000481481	'Hacat cells'	'Human cells'	-3.31742	'Gajewicz et al. Nanotoxicology, 2015;9(3):313-25'
'ZnO'	81	100	'24 h'	'WST-1 assay'	'IC50'	21.47	0.000265062	'HEK293'	'Human cells'	-3.57665	'Dua et al., 2011,Bull. Korean Chem. Soc. Vol. 32, No. 6 2051'
'ZnO'	81	NaN	'24 h'	'Cellular proliferation colorimetric assay'	'LD 50'	250	0.00308642	'A549'	'Human cells'	-2.51055	'Lozano et al 2011 J. Phys.: Conf. Ser. 304 012046'
'ZnO'	81	NaN	'48 h'	'Cellular proliferation colorimetric assay'	'LD 50'	75	0.000925926	'A549'	'Human cells'	-3.03342	'Lozano et al 2011 J. Phys.: Conf. Ser. 304 012046'
'ZnO'	81	NaN	'216'	'resazurin fluorescence assay'	'ec50'	41.1	0.000507407	'A549'	'Human cells'	-3.29464	'Titma et al. Cytotechnology. 2016;68(6):2363-2377'
'ZnO'	81	NaN	'60 h'	'resazurin fluorescence assay'	'ec50'	46	0.000567901	'A549'	'Human cells'	-3.24573	'Titma et al. Cytotechnology. 2016;68(6):2363-2377'
'ZnO'	81	NaN	'108'	'resazurin fluorescence assay'	'ec50'	46.8	0.000577778	'A549'	'Human cells'	-3.23824	'Titma et al. Cytotechnology. 2016;68(6):2363-2377'
'ZnO'	81	NaN	'60 h'	'resazurin fluorescence assay'	'ec50'	52.4	0.000646914	'Caco2'	'Human cells'	-3.18915	'Titma et al. Cytotechnology. 2016;68(6):2363-2377'
'ZnO'	81	NaN	'216'	'resazurin fluorescence assay'	'ec50'	61.2	0.000755556	'Caco2'	'Human cells'	-3.12173	'Titma et al. Cytotechnology. 2016;68(6):2363-2377'
'ZnO'	81	NaN	'108'	'resazurin fluorescence assay'	'ec50'	62.5	0.000771605	'Caco2'	'Human cells'	-3.11261	'Titma et al. Cytotechnology. 2016;68(6):2363-2377'
'ZnO'	81	NaN	'24 h'	'Cellular proliferation colorimetric assay'	'LD 50'	125	0.00154321	'HeLa cells'	'Human cells'	-2.81158	'Lozano et al 2011 J. Phys.: Conf. Ser. 304 012046'
'ZnO'	81	NaN	'48 h'	'Cellular proliferation colorimetric assay'	'LD 50'	125	0.00154321	'HeLa cells'	'Human cells'	-2.81158	'Lozano et al 2011 J. Phys.: Conf. Ser. 304 012046'
'ZnO'	81	NaN	'24 h'	'Cellular proliferation colorimetric assay'	'LD 50'	250	0.00308642	'NCl H460'	'Human cells'	-2.51055	'Lozano et al 2011 J. Phys.: Conf. Ser. 304 012046'
'ZnO'	81	NaN	'48 h'	'Cellular proliferation colorimetric assay'	'LD 50'	150	0.00185185	'NCl H460'	'Human cells'	-2.73239	'Lozano et al 2011 J. Phys.: Conf. Ser. 304 012046'
'ZnO'	81	NaN	'24 h'	'aBlue'	'IC50'	60	0.000740741	'A549'	'Human cells'	-3.13033	'Seiffert et al., 2012,Chem. Res. Toxicol., 25, 140–152'
'ZnO'	81	NaN	'24 h'	'Impedance'	'IC50'	60	0.000740741	'A549'	'Human cells'	-3.13033	'Seiffert et al., 2012,Chem. Res. Toxicol., 25, 140–152'
'ZnO'	81	NaN	'24 h'	'MTT'	'IC50'	60	0.000740741	'A549'	'Human cells'	-3.13033	'Seiffert et al., 2012,Chem. Res. Toxicol., 25, 140–152'
'ZnO'	81	NaN	'24 h'	'NRU assay'	'IC50'	60	0.000740741	'A549'	'Human cells'	-3.13033	'Seiffert et al., 2012,Chem. Res. Toxicol., 25, 140–152'
'ZnO'	81	NaN	'24 h'	'WST-1'	'IC50'	60	0.000740741	'A549'	'Human cells'	-3.13033	'Seiffert et al., 2012,Chem. Res. Toxicol., 25, 140–152'
'ZrO2'	123	19.87	'24 h'	'CCK-8 cytotoxicity assay'	'EC50'	1202	0.00977237	'A549 cells'	'Human cells'	-2.01	'Cao et al. Green Chem., 2020,22, 3512-3521'
'ZrO2'	123	32	'24 h'	'MTT assay'	'IC50'	911.2	0.00740813	'a549'	'Human cells'	-2.13029	'Lanone et al. Particle and Fibre Toxicology 2009, 6:14'
'ZrO2'	123	32	'24 h'	'MTT assay'	'IC50'	82.88	0.000673821	'a549'	'Human cells'	-3.17146	'Lanone et al. Particle and Fibre Toxicology 2009, 6:14'
'ZrO2'	123	32	'24 h'	'MTT assay'	'IC50'	570.6	0.00463902	'THP-1'	'Human cells'	-2.33357	'Lanone et al. Particle and Fibre Toxicology 2009, 6:14'
'ZrO2'	123	40.1	'24 h'	'ATP assay'	'EC50'	NaN	NaN	'BEAS-2B cells, ATP assay'	'Human cells'	NaN	'Zhang et al. ACS Nano 2012, 6, 5, 4349–4368'
'ZrO2'	123	40.1	'24 h'	'MTS assay'	'EC50'	NaN	NaN	'BEAS-2B cells, MTS assay'	'Human cells'	NaN	'Zhang et al. ACS Nano 2012, 6, 5, 4349–4368'
'ZrO2'	123	46.7	'24 h'	'CytoTox-Glo Cytotoxicity Assay'	'LC50'	1188	0.00965854	'Hacat cells'	'Human cells'	-2.01509	'Gajewicz et al. Nanotoxicology, 2015;9(3):313-25'
'ZrO2'	123	NaN	'24 h'	'MTT assay'	'ec50'	1000	0.00813008	'A549'	'Human cells'	-2.08991	'Horie et al. Metallomics, 2012, 4, 350–360'
'ZrO2'	123	NaN	'24 h'	'MTT assay'	'ec50'	1000	0.00813008	'Hacat'	'Human cells'	-2.08991	'Horie et al. Metallomics, 2012, 4, 350–360'
Human Cells- Validation data
NP	Molar weight (g/mol)	Size	Exposure time	Assay	Endpoint	Value (mg/l	Value(mol/L)	Cell type	Cell group	Log(endpoint)	reference
'Ag'	108	20.4	'24 h'	'Membrane integrity'	'ec50'	6.4	5.92593e-05	'human mesenchymal stem cells'	'Human cells'	-4.22724	'Bondarenko et al. Nanotoxicology, 2016; 10(9): 1229–1242'
'Ag'	108	50	'24 h'	'MTT'	'EC50'	112	0.00103704	'SGC‐7901'	'Human cells'	-2.98421	'Liu et al. Nanotoxicology, 2010; 4(3): 319–330'
'Ag'	108	312	'24 h'	'MTT assay'	'IC50'	42.67	0.000395093	'a549'	'Human cells'	-3.4033	'Lanone et al. Particle and Fibre Toxicology 2009, 6:14'
'Ag'	108	312	'24 h'	'MTT assay'	'IC50'	19.33	0.000178981	'THP-1'	'Human cells'	-3.74719	'Lanone et al. Particle and Fibre Toxicology 2009, 6:14'
'Ag'	108	NaN	'24 h'	'Cell viability (MTT assay)'	'EC50'	78.9	0.000730556	'HeLa cells'	'Human cells'	-3.13635	'Kim et al. Bull. Korean Chem. Soc. 2012, Vol. 33, No. 10'
'Al2O3'	102	14.7	'24 h'	'MTS assay'	'EC50'	NaN	NaN	'BEAS-2B cells, MTS assay'	'Human cells'	NaN	'Zhang et al. ACS Nano 2012, 6, 5, 4349–4368'
'Al2O3'	102	NaN	'24 h'	'MTT assay'	'IC50'	82.19	0.000805784	'THP-1'	'Human cells'	-3.09378	'Lanone et al. Particle and Fibre Toxicology 2009, 6:14'
'Al2O3'	102	NaN	'24 h'	'Neutral Red assay.'	'IC50'	672.5	0.00659314	'THP-1'	'Human cells'	-2.18091	'Lanone et al. Particle and Fibre Toxicology 2009, 6:29'
'Al2O3'	102	28.15	'24 h'	'Cytotoxicity (PI staining)'	'ec50 (in SFM medium)'	NaN	NaN	'A549 cells'	'Human cells'	NaN	'Areecheewakul, et al. NanoImpact 18 (2020) 100214'
'Bi2O3'	466	149	'24 h'	'MTT'	'LC50'	100	0.000214592	'NRK-52E'	'Human cells'	-3.66839	'Abudayyak et al. / Chemosphere 169 (2017) 117e123118'
'Bi2O3'	466	149	'24 h'	'MTT'	'LC50'	100	0.000214592	'Caco-2'	'Human cells'	-3.66839	'Abudayyak et al. / Chemosphere 169 (2017) 117e123118'
'CeO2'	172	NaN	'24 h'	'Cellular proliferation colorimetric assay'	'LD 50'	1000	0.00581395	'HeLa cells'	'Human cells'	-2.23553	'Lozano et al 2011 J. Phys.: Conf. Ser. 304 012046'
'CeO2'	172	NaN	'24 h'	'Cellular proliferation colorimetric assay'	'LD 50'	1000	0.00581395	'SK- MES 1'	'Human cells'	-2.23553	'Lozano et al 2011 J. Phys.: Conf. Ser. 304 012046'
'Co'	59	NaN	'24 h'	'Cell viability (MTT assay)'	'EC50'	77.5	0.00131356	'PC3'	'Human cells'	-2.88155	'Kim et al. Bull. Korean Chem. Soc. 2012, Vol. 33, No. 10'
'Co3O4'	241	22.36	'24 h'	'CCK-8 cytotoxicity assay'	'EC50'	264.251	0.00109648	'A549 cells'	'Human cells'	-2.96	'Cao et al. Green Chem., 2020,22, 3512-3521'
'Co3O4'	241	NaN	'108'	'resazurin fluorescence assay'	'ec50'	107.3	0.000445228	'A549'	'Human cells'	-3.35142	'Titma et al. Cytotechnology. 2016;68(6):2363-2377'
'Co3O4'	241	NaN	'24 h'	'Almarblue assay'	'EC50'	241	0.001	'HaCaT cells'	'Human cells'	-3	'Mauro et al. Int. J. Environ. Res. Public Health 2015, 12, 8263-8280'
'Co3O4'	241	NaN	'48 h'	'Almarblue assay'	'EC50'	241	0.001	'HaCaT cells'	'Human cells'	-3	'Mauro et al. Int. J. Environ. Res. Public Health 2015, 12, 8263-8280'
'Co3O4'	241	NaN	'7 days'	'MTT assay'	'EC50'	31.33	0.00013	'HaCaT cells'	'Human cells'	-3.88606	'Mauro et al. Int. J. Environ. Res. Public Health 2015, 12, 8263-8280'
'Co3O4'	241	NaN	'48 h'	'MTT assay'	'EC50'	241	0.001	'HaCaT cells'	'Human cells'	-3	'Mauro et al. Int. J. Environ. Res. Public Health 2015, 12, 8263-8280'
'Cu'	64	22.9	'24 h'	'MTT assay'	'IC50'	13.49	0.000210781	'a549'	'Human cells'	-3.67617	'Lanone et al. Particle and Fibre Toxicology 2009, 6:14'
'Cu'	64	22.9	'24 h'	'Neutral Red assay.'	'IC50'	114.7	0.00179219	'THP-1'	'Human cells'	-2.74662	'Lanone et al. Particle and Fibre Toxicology 2009, 6:29'
'Cu'	64	90	'24 h'	'MTT assay'	'IC50'	48.13	0.000752031	'a549'	'Human cells'	-3.12376	'Lanone et al. Particle and Fibre Toxicology 2009, 6:14'
'Cu'	64	90	'24 h'	'MTT assay'	'IC50'	5.29	8.26563e-05	'THP-1'	'Human cells'	-4.08272	'Lanone et al. Particle and Fibre Toxicology 2009, 6:14'
'Cu'	64	90	'24 h'	'MTT assay'	'IC50'	6.59	0.000102969	'THP-1'	'Human cells'	-3.98729	'Lanone et al. Particle and Fibre Toxicology 2009, 6:14'
'Cu2O'	143	NaN	'24 h'	'Neutral Red assay.'	'IC50'	2.93	2.04895e-05	'THP-1'	'Human cells'	-4.68847	'Lanone et al. Particle and Fibre Toxicology 2009, 6:29'
'CuO'	79.545	12.8	'24 h'	'MTS assay'	'EC50'	23.9883	0.000301569	'BEAS-2B cells, MTS assay'	'Human cells'	-3.52061	'Zhang et al. ACS Nano 2012, 6, 5, 4349–4368'
'CuO'	79.545	24.5	'24 h'	'Membrane integrity'	'ec50'	2.2	2.76573e-05	'human mesenchymal stem cells'	'Human cells'	-4.55819	'Bondarenko et al. Nanotoxicology, 2016; 10(9): 1229–1242'
'CuO'	79.545	30	'24 h'	'MTT assay'	'IC50'	10.82	0.000136024	'a549'	'Human cells'	-3.86639	'Lanone et al. Particle and Fibre Toxicology 2009, 6:14'
'CuO'	79.545	30	'24 h'	'Neutral Red assay.'	'IC50'	17.88	0.000224778	'THP-1'	'Human cells'	-3.64825	'Lanone et al. Particle and Fibre Toxicology 2009, 6:29'
'CuO'	79.545	NaN	'24 h'	'resazurin fluorescence assay'	'ec50'	43.8	0.000550632	'A549'	'Human cells'	-3.25914	'Titma et al. Cytotechnology. 2016;68(6):2363-2377'
'CuO'	79.545	NaN	'36 h'	'resazurin fluorescence assay'	'ec50'	38.6	0.00048526	'Caco2'	'Human cells'	-3.31403	'Titma et al. Cytotechnology. 2016;68(6):2363-2377'
'Fe2O3'	160	100	'48 h'	'WST-1 assay'	'IC50'	464	0.0029	'HEK293'	'Human cells'	-2.5376	'Dua et al., 2011,Bull. Korean Chem. Soc. Vol. 32, No. 6 2051'
'Fe2O3'	160	NaN	'48 h'	'Cellular proliferation colorimetric assay'	'LD 50'	1000	0.00625	'NCl H460'	'Human cells'	-2.20412	'Lozano et al 2011 J. Phys.: Conf. Ser. 304 012046'
'Fe2O3'	160	12.3	'24 h'	'MTS assay'	'EC50'	NaN	NaN	'BEAS-2B cells, MTS assay'	'Human cells'	NaN	'Zhang et al. ACS Nano 2012, 6, 5, 4349–4368'
'Fe3o4'	232	NaN	'48 h'	'MTT assay'	'IC50'	1000	0.00431034	'K562 cells'	'Human cells'	-2.36549	'Malekshah et al. ,2020, Drug Delivery, 27:1, 1201-1217'
'Fe3o4'	232	6	'24 H'	'CCK-8'	'EC50'	NaN	NaN	'SK HEP 1'	'Human cells'	NaN	'Xie et al. International journal of Nanomedicine, 11, 2016, 3557—3570'
'Fe3o4'	232	14	'24 H'	'CCK-8'	'EC50'	NaN	NaN	'SK HEP 1'	'Human cells'	NaN	'Xie et al. International journal of Nanomedicine, 11, 2016, 3557—3570'
'Gd2O3'	362	NaN	'24 h'	'MTT assay'	'ec50'	NaN	NaN	'Hacat'	'Human cells'	NaN	'Horie et al. Metallomics, 2012, 4, 350–360'
'HfO2'	210	43.86	'24 h'	'CCK-8 cytotoxicity assay'	'EC50'	1236.57	0.00588844	'A549 cells'	'Human cells'	-2.23	'Cao et al. Green Chem., 2020,22, 3512-3521'
'MgO'	40	20	'24 h'	'MTT assay'	'ec50'	1000	0.025	'A549'	'Human cells'	-1.60206	'Horie et al. Metallomics, 2012, 4, 350–360'
'MgO'	40	23.8	'24 h'	'Cytotoxicity (PI staining)'	'ec50 (in SFM medium)'	150	0.00375	'A549 cells'	'Human cells'	-2.42597	'Areecheewakul, et al. NanoImpact 18 (2020) 100214'
'MgO'	40	NaN	'24 h'	'NRU assay'	'IC50'	NaN	NaN	'A549'	'Human cells'	NaN	'Ivansk et al. Curr Top Med Chem., 2015;15(18):1914-29'
'Mn2O3'	158	29.8	'24 h'	'CytoTox-Glo Cytotoxicity Assay'	'LC50'	362	0.00229114	'Hacat cells'	'Human cells'	-2.63995	'Gajewicz et al. Nanotoxicology, 2015;9(3):313-25'
'Mn3O4'	229	14.9	'24 h'	'NRU assay'	'IC50'	66.7	0.000291266	'Caco2'	'Human cells'	-3.53571	'Ivansk et al. Curr Top Med Chem., 2015;15(18):1914-29'
'Mn3o4'	229	NaN	'36 h'	'resazurin fluorescence assay'	'ec50'	90.6	0.000395633	'A549'	'Human cells'	-3.40271	'Titma et al. Cytotechnology. 2016;68(6):2363-2377'
'Ni2O3'	165	140.6	'24 h'	'ATP assay'	'EC50'	63.0957	0.000382398	'BEAS-2B cells, ATP assay'	'Human cells'	-3.41748	'Zhang et al. ACS Nano 2012, 6, 5, 4349–4368'
'Sb2O3'	292	NaN	'60 h'	'resazurin fluorescence assay'	'ec50'	38	0.000130137	'Caco2'	'Human cells'	-3.8856	'Titma et al. Cytotechnology. 2016;68(6):2363-2377'
'Sb2O3'	292	NaN	'24 h'	'TEER assay'	'ec50'	10	3.42466e-05	'Caco2'	'Human cells'	-4.46538	'Titma et al. Cytotechnology. 2016;68(6):2363-2377'
'SiO2'	60	13.5	'24 h'	'MTS assay'	'EC50'	2.75423e+07	459.038	'BEAS-2B cells, MTS assay'	'Human cells'	2.66185	'Zhang et al. ACS Nano 2012, 6, 5, 4349–4368'
'SiO2'	60	15.23	'24 h'	'CCK-8 cytotoxicity assay'	'EC50'	293.867	0.00489779	'A549 cells'	'Human cells'	-2.31	'Cao et al. Green Chem., 2020,22, 3512-3521'
'SnO2'	151	62.4	'24 h'	'ATP assay'	'EC50'	NaN	NaN	'BEAS-2B cells, ATP assay'	'Human cells'	NaN	'Zhang et al. ACS Nano 2012, 6, 5, 4349–4368'
'TiO2'	80	12.2	'24 h'	'MTT assay'	'IC50'	369.2	0.004615	'THP-1'	'Human cells'	-2.33583	'Lanone et al. Particle and Fibre Toxicology 2009, 6:14'
'TiO2'	80	14.2	'24 h'	'NRU assay'	'IC50'	NaN	NaN	'A549'	'Human cells'	NaN	'Ivansk et al. Curr Top Med Chem., 2015;15(18):1914-29'
'TiO2'	80	21.2	'24 h'	'CCK-8 cytotoxicity assay'	'EC50'	129.745	0.00162181	'A549 cells'	'Human cells'	-2.79	'Cao et al. Green Chem., 2020,22, 3512-3521'
'TiO2'	80	113.4	'24 h'	'Cytotoxicity (MTS)'	'ec50 (in SFM medium)'	NaN	NaN	'A549 cells'	'Human cells'	NaN	'Areecheewakul, et al. NanoImpact 18 (2020) 100214'
'TiO2'	80	NaN	'48 h'	'Cellular proliferation colorimetric assay'	'LD 50'	1000	0.0125	'A549'	'Human cells'	-1.90309	'Lozano et al 2011 J. Phys.: Conf. Ser. 304 012046'
'TiO2'	80	NaN	'12 h'	'resazurin fluorescence assay'	'ec50'	NaN	NaN	'A549'	'Human cells'	NaN	'Titma et al. Cytotechnology. 2016;68(6):2363-2377'
'TiO2'	80	NaN	'36 h'	'resazurin fluorescence assay'	'ec50'	NaN	NaN	'A549'	'Human cells'	NaN	'Titma et al. Cytotechnology. 2016;68(6):2363-2377'
'TiO2'	80	NaN	'24 h'	'resazurin fluorescence assay'	'ec50'	NaN	NaN	'A549'	'Human cells'	NaN	'Titma et al. Cytotechnology. 2016;68(6):2363-2377'
'TiO2'	80	NaN	'60 h'	'resazurin fluorescence assay'	'ec50'	NaN	NaN	'A549'	'Human cells'	NaN	'Titma et al. Cytotechnology. 2016;68(6):2363-2377'
'TiO2'	80	NaN	'36 h'	'resazurin fluorescence assay'	'ec50'	NaN	NaN	'Caco2'	'Human cells'	NaN	'Titma et al. Cytotechnology. 2016;68(6):2363-2377'
'TiO2'	80	NaN	'24 h'	'resazurin fluorescence assay'	'ec50'	NaN	NaN	'Caco2'	'Human cells'	NaN	'Titma et al. Cytotechnology. 2016;68(6):2363-2377'
'TiO2'	80	NaN	'216'	'resazurin fluorescence assay'	'ec50'	NaN	NaN	'Caco2'	'Human cells'	NaN	'Titma et al. Cytotechnology. 2016;68(6):2363-2377'
'TiO2'	80	NaN	'24 h'	'Cellular proliferation colorimetric assay'	'LD 50'	1000	0.0125	'SK- MES 1'	'Human cells'	-1.90309	'Lozano et al 2011 J. Phys.: Conf. Ser. 304 012046'
'TiO2'	80	NaN	'24 h'	'aBlue'	'IC50'	NaN	NaN	'A549'	'Human cells'	NaN	'Seiffert et al., 2012,Chem. Res. Toxicol., 25, 140–152'
'TiO2'	80	NaN	'24 h'	'MTT'	'IC50'	NaN	NaN	'A549'	'Human cells'	NaN	'Seiffert et al., 2012,Chem. Res. Toxicol., 25, 140–152'
'TiO2'	80	NaN	'24 h'	'NRU assay'	'IC50'	NaN	NaN	'A549'	'Human cells'	NaN	'Seiffert et al., 2012,Chem. Res. Toxicol., 25, 140–152'
'TiO2'	80	NaN	'24 h'	'Impedance'	'IC50'	NaN	NaN	'A549'	'Human cells'	NaN	'Seiffert et al., 2012,Chem. Res. Toxicol., 25, 140–152'
'TiO2'	80	NaN	'24 h'	'MTT assay'	'ec50'	1000	0.0125	'Hacat'	'Human cells'	-1.90309	'Horie et al. Metallomics, 2012, 4, 350–360'
'WO3'	232	30	'24 h'	'MTT assay'	'ec50'	1000	0.00431034	'A549'	'Human cells'	-2.36549	'Horie et al. Metallomics, 2012, 4, 350–360'
'Y2O3'	226	38	'24 h'	'CytoTox-Glo Cytotoxicity Assay'	'LC50'	1390	0.00615044	'Hacat cells'	'Human cells'	-2.21109	'Gajewicz et al. Nanotoxicology, 2015;9(3):313-25'
'Y2O3'	226	41.89	'24 h'	'CCK-8 cytotoxicity assay'	'EC50'	247.804	0.00109648	'A549 cells'	'Human cells'	-2.96	'Cao et al. Green Chem., 2020,22, 3512-3521'
'ZnO'	81	20	'24 h'	'Cell viability'	'EC50'	12.5	0.000154321	'BEAS-2B'	'Human cells'	-3.81158	'Huang et al. Materials 2010, 3, 4842-4859;'
'ZnO'	81	45.7	'24 h'	'Cytotoxicity (MTS)'	'ec50 (in SCM medium)'	50	0.000617284	'A549 cells'	'Human cells'	-3.20952	'Areecheewakul, et al. NanoImpact 18 (2020) 100214'
'ZnO'	81	100	'48 h'	'WST-1 assay'	'IC50'	20	0.000246914	'HEK293'	'Human cells'	-3.60746	'Dua et al., 2011,Bull. Korean Chem. Soc. Vol. 32, No. 6 2051'
'ZnO'	81	NaN	'36 h'	'resazurin fluorescence assay'	'ec50'	42.8	0.000528395	'A549'	'Human cells'	-3.27704	'Titma et al. Cytotechnology. 2016;68(6):2363-2377'
'ZnO'	81	NaN	'12 h'	'resazurin fluorescence assay'	'ec50'	117.6	0.00145185	'A549'	'Human cells'	-2.83808	'Titma et al. Cytotechnology. 2016;68(6):2363-2377'
'ZnO'	81	NaN	'36 h'	'resazurin fluorescence assay'	'ec50'	65.9	0.00081358	'Caco2'	'Human cells'	-3.0896	'Titma et al. Cytotechnology. 2016;68(6):2363-2377'
'ZnO'	81	NaN	'24 h'	'Cellular proliferation colorimetric assay'	'LD 50'	200	0.00246914	'SK- MES 1'	'Human cells'	-2.60746	'Lozano et al 2011 J. Phys.: Conf. Ser. 304 012046'
'ZnO'	81	NaN	'48 h'	'Cellular proliferation colorimetric assay'	'LD 50'	100	0.00123457	'SK- MES 1'	'Human cells'	-2.90849	'Lozano et al 2011 J. Phys.: Conf. Ser. 304 012046'

## Sheet: Bacteria
Bacteria - Traning data
NP	Molar weight (g/mol)	Size	Exposure time	Assay	Endpoint	Value (mg/l	Value(mol/L)	Cell type	Cell group	Log(endpoint)	reference
'Ag'	108	20.4	'4 h'	'growth inhibition assay'	'ec50'	4.5	4.16667e-05	'Bacillus subtilis'	'Bacteria'	-4.38021	'Bondarenko et al. Nanotoxicology, 2016; 10(9): 1229–1242'
'Ag'	108	NaN	'2 h'	'luminescence inhbition'	'ec50'	45.9	0.000425	'E. coli AB1157'	'Bacteria'	-3.37161	'Ivansk et al Anal Bioanal Chem (2010) 398:701–716'
'Ag'	108	NaN	'30 min'	'luminescence inhbition'	'ec50'	571	0.00528704	'E. coli AB1157'	'Bacteria'	-2.27679	'Ivansk et al Anal Bioanal Chem (2010) 398:701–716'
'Ag'	108	NaN	'2 h'	'luminescence inhbition'	'ec50'	3.11	2.87963e-05	'E. coli AS391'	'Bacteria'	-4.54066	'Ivansk et al Anal Bioanal Chem (2010) 398:701–716'
'Ag'	108	NaN	'30 min'	'luminescence inhbition'	'ec50'	5.8	5.37037e-05	'E. coli AS391'	'Bacteria'	-4.27	'Ivansk et al Anal Bioanal Chem (2010) 398:701–716'
'Ag'	108	NaN	'30 min'	'luminescence inhbition'	'ec50'	329	0.0030463	'E. coli AS393'	'Bacteria'	-2.51623	'Ivansk et al Anal Bioanal Chem (2010) 398:701–716'
'Ag'	108	NaN	'2 h'	'luminescence inhbition'	'ec50'	30.9	0.000286111	'E. coli JI130'	'Bacteria'	-3.54347	'Ivansk et al Anal Bioanal Chem (2010) 398:701–716'
'Ag'	108	NaN	'30 min'	'luminescence inhbition'	'ec50'	331	0.00306481	'E. coli JI130'	'Bacteria'	-2.5136	'Ivansk et al Anal Bioanal Chem (2010) 398:701–716'
'Ag'	108	NaN	'2 h'	'luminescence inhbition'	'ec50'	18.8	0.000174074	'E. coli JI131'	'Bacteria'	-3.75927	'Ivansk et al Anal Bioanal Chem (2010) 398:701–716'
'Ag'	108	NaN	'30 min'	'luminescence inhbition'	'ec50'	485	0.00449074	'E. coli JI131'	'Bacteria'	-2.34768	'Ivansk et al Anal Bioanal Chem (2010) 398:701–716'
'Ag'	108	NaN	'2 h'	'luminescence inhbition'	'ec50'	3.79	3.50926e-05	'E. coli JI132'	'Bacteria'	-4.45478	'Ivansk et al Anal Bioanal Chem (2010) 398:701–716'
'Ag'	108	20.4	'4 h'	'growth inhibition assay'	'ec50'	3.1	2.87037e-05	'Escherichia Coli'	'Bacteria'	-4.54206	'Bondarenko et al. Nanotoxicology, 2016; 10(9): 1229–1242'
'Ag'	108	20.4	'4 h'	'growth inhibition assay'	'ec50'	3.2	2.96296e-05	'Pseudomonas aeruginosa'	'Bacteria'	-4.52827	'Bondarenko et al. Nanotoxicology, 2016; 10(9): 1229–1242'
'Ag'	108	20.4	'4 h'	'growth inhibition assay'	'ec50'	5.2	4.81481e-05	'Staphylococcus aureus'	'Bacteria'	-4.31742	'Bondarenko et al. Nanotoxicology, 2016; 10(9): 1229–1242'
'Ag'	108	20.4	'30 min'	'bioluminescence inhibition assay'	'ec50'	2.9	2.68519e-05	'Vibrio fischeri'	'Bacteria'	-4.57103	'Bondarenko et al. Nanotoxicology, 2016; 10(9): 1229–1242'
'Ag2O'	233	NaN	'16 h'	'growth inhibition CFU assay'	'IC50'	18	7.72532e-05	'B. aerius'	'Bacteria'	-4.11208	'Negi et al. J Gen Appl Microbiol. 2013;59(1):83-8'
'Ag2O'	233	NaN	'16 h'	'growth inhibition CFU assay'	'IC50'	9	3.86266e-05	'E.coli'	'Bacteria'	-4.41311	'Negi et al. J Gen Appl Microbiol. 2013;59(1):83-8'
'Ag2O'	233	NaN	'16 h'	'growth inhibition CFU assay'	'IC50'	9	3.86266e-05	'P. aeruginosa'	'Bacteria'	-4.41311	'Negi et al. J Gen Appl Microbiol. 2013;59(1):83-8'
'Al2O3'	102	NaN	'2 h'	'Cytotoxicity assay'	'LD50'	326.1	0.00319706	'E.coli'	'Bacteria'	-2.49525	'Hu et al. Sci. Total Environ. 407 (2009) 3070–3072'
'CeO2'	172	25	'2 h'	'Cell Viability CFU assay'	'ec50'	64.05	0.000372384	'E Coli'	'Bacteria'	-3.42901	'Kar et al. Chemosphere 264 (2021) 128428'
'CeO2'	172	18.3	'24 h'	'growth inhibition assay'	'IC50'	NaN	NaN	'E.coli'	'Bacteria'	NaN	'Kaweeteerawat et al. Environ. Sci. Technol. 2015, 49, 1105−1112'
'Co2O3'	166	NaN	'2 h'	'Cell Viability CFU assay'	'ec50'	77.145	0.000464729	'E Coli'	'Bacteria'	-3.3328	'Kar et al. Chemosphere 264 (2021) 128428'
'Co3O4'	241	NaN	'2 h'	'Cell Viability CFU assay'	'ec50'	240	0.000995851	'E Coli'	'Bacteria'	-3.00181	'Kar et al. Chemosphere 264 (2021) 128428'
'Co3O4'	241	10	'24 h'	'growth inhibition assay'	'IC50'	138	0.000572614	'E.coli'	'Bacteria'	-3.24214	'Kaweeteerawat et al. Environ. Sci. Technol. 2015, 49, 1105−1112'
'Co3O4'	241	78.3	'30 min'	'Cytotoxicity assays'	'LC50'	55.56	0.000230539	'Escherichia Coli'	'Bacteria'	-3.63725	'Dasari et al. J Environ Sci, 2013;25(5):882-8'
'CoO'	75	71.8	'24 h'	'growth inhibition assay'	'IC50'	43	0.000573333	'E.coli'	'Bacteria'	-3.24159	'Kaweeteerawat et al. Environ. Sci. Technol. 2015, 49, 1105−1112'
'CoO'	75	55	'30 min'	'Cell viability assay CFU'	'LC50'	55.5983	0.00074131	'E.coli'	'Bacteria'	-3.13	'Pathakoti et al. Journal of Photochemistry and Photobiology B: Biology 130 (2014) 234–240'
'CoO'	75	NaN	'2 h'	'Cell viability assay CFU'	'EC50'	23.1772	0.00030903	'E.coli'	'Bacteria'	-3.51	'Puzyn et al. Nature Nanotech 6, 175–178 (2011)'
'Cr2O3'	152	193	'24 h'	'growth inhibition assay'	'IC50'	232	0.00152632	'E.coli'	'Bacteria'	-2.81636	'Kaweeteerawat et al. Environ. Sci. Technol. 2015, 49, 1105−1112'
'Cr2O3'	152	47	'30 min'	'Cell viability assay CFU'	'LC50'	1323.86	0.00870964	'E.coli'	'Bacteria'	-2.06	'Pathakoti et al. Journal of Photochemistry and Photobiology B: Biology 130 (2014) 234–240'
'Cr2O3'	152	NaN	'2 h'	'Cell viability assay CFU'	'EC50'	469.725	0.0030903	'E.coli'	'Bacteria'	-2.51	'Puzyn et al. Nature Nanotech 6, 175–178 (2011)'
'Cu'	64	25	'96 h'	'growth inhibition assay'	'EC50'	0.3	4.6875e-06	'Soil bacterial community'	'Bacteria'	-5.32906	'Y. Zhai et al. Ecotoxicology and Environmental Safety 145 (2017) 349–361'
'Cu'	64	50	'96 h'	'growth inhibition assay'	'EC50'	0.38	5.9375e-06	'Soil bacterial community'	'Bacteria'	-5.2264	'Y. Zhai et al. Ecotoxicology and Environmental Safety 145 (2017) 349–362'
'Cu'	64	78	'96 h'	'growth inhibition assay'	'EC50'	0.57	8.90625e-06	'Soil bacterial community'	'Bacteria'	-5.05031	'Y. Zhai et al. Ecotoxicology and Environmental Safety 145 (2017) 349–363'
'Cu'	64	100	'96 h'	'growth inhibition assay'	'EC50'	0.54	8.4375e-06	'Soil bacterial community'	'Bacteria'	-5.07379	'Y. Zhai et al. Ecotoxicology and Environmental Safety 145 (2017) 349–364'
'Cu'	64	40	'15 min'	'bioluminescence inhibition assay'	'EC50'	4.1	6.40625e-05	'Vibrio Fischeri'	'Bacteria'	-4.1934	'Zhang et al. Environ Monit Assess (2020) 192: 484'
'CuO'	79.545	30	'30 min'	'luminescence inhbition'	'ec50'	50.5	0.000634861	'E. coli AB1157'	'Bacteria'	-3.19732	'Ivansk et al Anal Bioanal Chem (2010) 398:701–716'
'CuO'	79.545	30	'2 h'	'luminescence inhbition'	'ec50'	9.85	0.000123829	'E. coli AS393'	'Bacteria'	-3.90718	'Ivansk et al Anal Bioanal Chem (2010) 398:701–716'
'CuO'	79.545	30	'30 min'	'luminescence inhbition'	'ec50'	47.6	0.000598403	'E. coli AS393'	'Bacteria'	-3.22301	'Ivansk et al Anal Bioanal Chem (2010) 398:701–716'
'CuO'	79.545	30	'2 h'	'luminescence inhbition'	'ec50'	6.73	8.46062e-05	'E. coli JI130'	'Bacteria'	-4.0726	'Ivansk et al Anal Bioanal Chem (2010) 398:701–716'
'CuO'	79.545	30	'30 min'	'luminescence inhbition'	'ec50'	39.7	0.000499089	'E. coli JI130'	'Bacteria'	-3.30182	'Ivansk et al Anal Bioanal Chem (2010) 398:701–716'
'CuO'	79.545	30	'2 h'	'luminescence inhbition'	'ec50'	7.45	9.36577e-05	'E. coli JI131'	'Bacteria'	-4.02846	'Ivansk et al Anal Bioanal Chem (2010) 398:701–716'
'CuO'	79.545	30	'2 h'	'luminescence inhbition'	'ec50'	3.25	4.08574e-05	'E. coli JI132'	'Bacteria'	-4.38873	'Ivansk et al Anal Bioanal Chem (2010) 398:701–716'
'CuO'	79.545	30	'30 min'	'luminescence inhbition'	'ec50'	14.8	0.000186058	'E. coli JI132'	'Bacteria'	-3.73035	'Ivansk et al Anal Bioanal Chem (2010) 398:701–716'
'CuO'	80	NaN	'2 h'	'Cytotoxicity assay'	'LD50'	64.5	0.00080625	'E.coli'	'Bacteria'	-3.09353	'Hu et al. Sci. Total Environ. 407 (2009) 3070–3072'
'CuO'	79.545	12.8	'24 h'	'growth inhibition assay'	'IC50'	39	0.000490289	'E.coli'	'Bacteria'	-3.30955	'Kaweeteerawat et al. Environ. Sci. Technol. 2015, 49, 1105−1112'
'CuO'	79.545	NaN	'1.5 h'	'bioluminescence activity assay'	'EC50'	54.01	0.000678987	'E.coli'	'Bacteria'	-3.16814	'Ko et al. Appl Microbiol Biotechnol (2014) 98:3295–3303'
'CuO'	79.545	28	'30 min'	'Cell viability assay CFU'	'LC50'	4.57734	5.7544e-05	'E.coli'	'Bacteria'	-4.24	'Pathakoti et al. Journal of Photochemistry and Photobiology B: Biology 130 (2014) 234–240'
'CuO'	79.545	NaN	'2 h'	'Cell viability assay CFU'	'EC50'	50.1895	0.000630957	'E.coli'	'Bacteria'	-3.2	'Puzyn et al. Nature Nanotech 6, 175–178 (2011)'
'CuO'	79.545	28	'30 min'	'Cytotoxicity assays'	'LC50'	4.63	5.8206e-05	'Escherichia Coli'	'Bacteria'	-4.23503	'Dasari et al. J Environ Sci, 2013;25(5):882-8'
'CuO'	80	13.1	'30 min'	'luminescence inhbition'	'EC50'	1.78	2.225e-05	'Vibrio Fischeri'	'Bacteria'	-4.65267	'Aruoja et al Environ. Sci.: Nano, 2015,2, 630-644'
'CuO'	79.545	24.5	'30 min'	'bioluminescence inhibition assay'	'ec50'	3.4	4.27431e-05	'Vibrio fischeri'	'Bacteria'	-4.36913	'Bondarenko et al. Nanotoxicology, 2016; 10(9): 1229–1242'
'CuO'	80	30	'30 min'	'bioluminescence inhibition assay'	'EC50'	79	0.0009875	'Vibrio fischeri'	'Bacteria'	-3.00546	'Heinlaan et al. Chemosphere 2008; 71 (7) 1308-1316'
'CuO'	79.545	NaN	'30 min'	'bioluminescence inhibition assay'	'EC50'	12.2	0.000153372	'Vibrio fischeri'	'Bacteria'	-3.81425	'Sovova et al., 2009, Proceedings,NANOCON Conference, Roznov , Czech Republic, pp 62‐71,'
'CuO'	79.545	30	'30 min'	'bioluminescence inhibition assay'	'ec50'	68.1	0.000856119	'Vibrio fischieri'	'Bacteria'	-3.06747	'Mortimer et al. Toxicology in Vitro 22 (2008) 1412–1417'
'Er2O3'	382.5	NaN	'2 h'	'Cell Viability CFU assay'	'ec50'	0.033	8.62745e-08	'E Coli'	'Bacteria'	-7.06412	'Kar et al. Chemosphere 264 (2021) 128428'
'Fe2O3'	160	NaN	'2 h'	'Cytotoxicity assay'	'LD50'	638.3	0.00398937	'E.coli'	'Bacteria'	-2.3991	'Hu et al. Sci. Total Environ. 407 (2009) 3070–3072'
'Fe2O3'	160	12.3	'24 h'	'growth inhibition assay'	'IC50'	NaN	NaN	'E.coli'	'Bacteria'	NaN	'Kaweeteerawat et al. Environ. Sci. Technol. 2015, 49, 1105−1112'
'Fe2O3'	160	NaN	'1.5 h'	'bioluminescence activity assay'	'EC50'	1000	0.00625	'E.coli'	'Bacteria'	-2.20412	'Ko et al. Appl Microbiol Biotechnol (2014) 98:3295–3303'
'Fe2O3'	160	68	'30 min'	'Cell viability assay CFU'	'LC50'	636.971	0.00398107	'E.coli'	'Bacteria'	-2.4	'Pathakoti et al. Journal of Photochemistry and Photobiology B: Biology 130 (2014) 234–240'
'Fe2O3'	160	NaN	'2 h'	'Cell viability assay CFU'	'EC50'	820.578	0.00512861	'E.coli'	'Bacteria'	-2.29	'Puzyn et al. Nature Nanotech 6, 175–178 (2011)'
'Fe3O4'	232	NaN	'2 h'	'Cell Viability CFU assay'	'ec50'	2000	0.00862069	'E Coli'	'Bacteria'	-2.06446	'Kar et al. Chemosphere 264 (2021) 128428'
'Ga2O3'	187	654	'15 min'	'Microtox bioassay'	'ec50'	NaN	NaN	'Vibrio fischeri'	'Bacteria'	NaN	'Nguyen et al. Journal of Environmental Science and Health, 2020 Part A, 55:2, 168-178'
'Gd2O3'	362	NaN	'2 h'	'Cell Viability CFU assay'	'ec50'	1212	0.00334807	'E Coli'	'Bacteria'	-2.47521	'Kar et al. Chemosphere 264 (2021) 128428'
'Gd2O3'	362	43.8	'24 h'	'growth inhibition assay'	'IC50'	NaN	NaN	'E.coli'	'Bacteria'	NaN	'Kaweeteerawat et al. Environ. Sci. Technol. 2015, 49, 1105−1112'
'HfO2'	210	28.4	'24 h'	'growth inhibition assay'	'IC50'	NaN	NaN	'E.coli'	'Bacteria'	NaN	'Kaweeteerawat et al. Environ. Sci. Technol. 2015, 49, 1105−1112'
'In2O3'	278	60	'30 min'	'Cell viability assay CFU'	'LC50'	411.192	0.00147911	'E.coli'	'Bacteria'	-2.83	'Pathakoti et al. Journal of Photochemistry and Photobiology B: Biology 130 (2014) 234–240'
'In2O3'	278	NaN	'2 h'	'Cell viability assay CFU'	'EC50'	430.571	0.00154882	'E.coli'	'Bacteria'	-2.81	'Puzyn et al. Nature Nanotech 6, 175–178 (2011)'
'In2O3'	278	626	'15 min'	'Microtox bioassay'	'ec50'	NaN	NaN	'Vibrio fischeri'	'Bacteria'	NaN	'Nguyen et al. Journal of Environmental Science and Health, 2020 Part A, 55:2, 168-178'
'In2O3'	278	59.6	'24 h'	'growth inhibition assay'	'IC50'	NaN	NaN	'E.coli'	'Bacteria'	NaN	'Kaweeteerawat et al. Environ. Sci. Technol. 2015, 49, 1105−1112'
'La2O3'	326	NaN	'2 h'	'Cytotoxicity assay'	'LD50'	456.9	0.00140153	'E.coli'	'Bacteria'	-2.8534	'Hu et al. Sci. Total Environ. 407 (2009) 3070–3072'
'MgO'	40	13.6	'30 min'	'luminescence inhbition'	'EC50'	NaN	NaN	'Vibrio Fischeri'	'Bacteria'	NaN	'Aruoja et al Environ. Sci.: Nano, 2015,2, 630-644'
'MgO'	40	NaN	'30 min'	'bioluminescence inhibition assay'	'EC50'	61.87	0.00154675	'Vibrio fischeri'	'Bacteria'	-2.81058	'Sovova et al., 2009, Proceedings,NANOCON Conference, Roznov , Czech Republic, pp 62‐71,'
'Mn2O3'	158	NaN	'2 h'	'Cell Viability CFU assay'	'ec50'	130	0.000822785	'E Coli'	'Bacteria'	-3.08471	'Kar et al. Chemosphere 264 (2021) 128428'
'Mn2O3'	158	51.5	'24 h'	'growth inhibition assay'	'IC50'	70	0.000443038	'E.coli'	'Bacteria'	-3.35356	'Kaweeteerawat et al. Environ. Sci. Technol. 2015, 49, 1105−1112'
'NiO'	75	30	'1.5 h'	'bioluminescence activity assay'	'EC50'	198.02	0.00264027	'E.coli'	'Bacteria'	-2.57835	'Ko et al. Appl Microbiol Biotechnol (2014) 98:3295–3303'
'NiO'	75	NaN	'2 h'	'Cell viability assay CFU'	'EC50'	26.611	0.000354813	'E.coli'	'Bacteria'	-3.45	'Puzyn et al. Nature Nanotech 6, 175–178 (2011)'
'NiO'	75	13.1	'24 h'	'growth inhibition assay'	'IC50'	NaN	NaN	'E.coli'	'Bacteria'	NaN	'Kaweeteerawat et al. Environ. Sci. Technol. 2015, 49, 1105−1112'
'Pd'	106	150	'96 h'	'growth inhibition assay'	'EC50'	9.36	8.83019e-05	'Soil bacterial community'	'Bacteria'	-4.05403	'Y. Zhai et al. Ecotoxicology and Environmental Safety 145 (2017) 349–366'
'Sb2O3'	292	NaN	'2 h'	'Cell viability assay CFU'	'EC50'	668.933	0.00229087	'E.coli'	'Bacteria'	-2.64	'Puzyn et al. Nature Nanotech 6, 175–178 (2011)'
'Sb2O3'	292	20.5	'30 min'	'luminescence inhbition'	'EC50'	73.74	0.000252534	'Vibrio Fischeri'	'Bacteria'	-3.59768	'Aruoja et al Environ. Sci.: Nano, 2015,2, 630-644'
'Sb2O3'	292	11.8	'24 h'	'growth inhibition assay'	'IC50'	NaN	NaN	'E.coli'	'Bacteria'	NaN	'Kaweeteerawat et al. Environ. Sci. Technol. 2015, 49, 1105−1112'
'SiO2'	60	212	'4 h'	'growth inhibition assay'	'ec50'	NaN	NaN	'Bacillus subtilis'	'Bacteria'	NaN	'Bondarenko et al. Nanotoxicology, 2016; 10(9): 1229–1242'
'SiO2'	60	13.5	'24 h'	'growth inhibition assay'	'IC50'	500	0.00833333	'E.coli'	'Bacteria'	-2.07918	'Kaweeteerawat et al. Environ. Sci. Technol. 2015, 49, 1105−1112'
'SiO2'	60	20	'30 min'	'Cell viability assay CFU'	'LC50'	173.042	0.00288403	'E.coli'	'Bacteria'	-2.54	'Pathakoti et al. Journal of Photochemistry and Photobiology B: Biology 130 (2014) 234–240'
'SiO2'	60	212	'4 h'	'growth inhibition assay'	'ec50'	NaN	NaN	'Escherichia Coli'	'Bacteria'	NaN	'Bondarenko et al. Nanotoxicology, 2016; 10(9): 1229–1242'
'SiO2'	60	212	'4 h'	'growth inhibition assay'	'ec50'	NaN	NaN	'Pseudomonas putida'	'Bacteria'	NaN	'Bondarenko et al. Nanotoxicology, 2016; 10(9): 1229–1242'
'SiO2'	60	7.8	'30 min'	'luminescence inhbition'	'EC50'	NaN	NaN	'Vibrio Fischeri'	'Bacteria'	NaN	'Aruoja et al Environ. Sci.: Nano, 2015,2, 630-644'
'SiO2'	60	212	'30 min'	'bioluminescence inhibition assay'	'ec50'	NaN	NaN	'Vibrio fischeri'	'Bacteria'	NaN	'Bondarenko et al. Nanotoxicology, 2016; 10(9): 1229–1242'
'SnO2'	151	NaN	'2 h'	'Cytotoxicity assay'	'LD50'	1045.6	0.0069245	'E.coli'	'Bacteria'	-2.15961	'Hu et al. Sci. Total Environ. 407 (2009) 3070–3072'
'SnO2'	151	62.4	'24 h'	'growth inhibition assay'	'IC50'	500	0.00331126	'E.coli'	'Bacteria'	-2.48001	'Kaweeteerawat et al. Environ. Sci. Technol. 2015, 49, 1105−1112'
'SnO2'	151	15	'30 min'	'Cell viability assay CFU'	'LC50'	445.633	0.00295121	'E.coli'	'Bacteria'	-2.53	'Pathakoti et al. Journal of Photochemistry and Photobiology B: Biology 130 (2014) 234–240'
'TiO2'	80	5	'4 h'	'growth inhibition assay'	'ec50'	NaN	NaN	'Bacillus subtilis'	'Bacteria'	NaN	'Bondarenko et al. Nanotoxicology, 2016; 10(9): 1229–1242'
'TiO2'	80	NaN	'2 h'	'luminescence inhbition'	'ec50'	20000	0.25	'E. coli AB1157'	'Bacteria'	-0.60206	'Ivansk et al Anal Bioanal Chem (2010) 398:701–716'
'TiO2'	80	NaN	'30 min'	'luminescence inhbition'	'ec50'	20000	0.25	'E. coli AB1157'	'Bacteria'	-0.60206	'Ivansk et al Anal Bioanal Chem (2010) 398:701–716'
'TiO2'	80	NaN	'2 h'	'luminescence inhbition'	'ec50'	20000	0.25	'E. coli AS391'	'Bacteria'	-0.60206	'Ivansk et al Anal Bioanal Chem (2010) 398:701–716'
'TiO2'	80	NaN	'30 min'	'luminescence inhbition'	'ec50'	20000	0.25	'E. coli AS391'	'Bacteria'	-0.60206	'Ivansk et al Anal Bioanal Chem (2010) 398:701–716'
'TiO2'	80	NaN	'30 min'	'luminescence inhbition'	'ec50'	20000	0.25	'E. coli AS393'	'Bacteria'	-0.60206	'Ivansk et al Anal Bioanal Chem (2010) 398:701–716'
'TiO2'	80	NaN	'2 h'	'luminescence inhbition'	'ec50'	20000	0.25	'E. coli JI130'	'Bacteria'	-0.60206	'Ivansk et al Anal Bioanal Chem (2010) 398:701–716'
'TiO2'	80	NaN	'30 min'	'luminescence inhbition'	'ec50'	20000	0.25	'E. coli JI130'	'Bacteria'	-0.60206	'Ivansk et al Anal Bioanal Chem (2010) 398:701–716'
'TiO2'	80	NaN	'2 h'	'luminescence inhbition'	'ec50'	20000	0.25	'E. coli JI131'	'Bacteria'	-0.60206	'Ivansk et al Anal Bioanal Chem (2010) 398:701–716'
'TiO2'	80	NaN	'30 min'	'luminescence inhbition'	'ec50'	20000	0.25	'E. coli JI131'	'Bacteria'	-0.60206	'Ivansk et al Anal Bioanal Chem (2010) 398:701–716'
'TiO2'	80	NaN	'2 h'	'luminescence inhbition'	'ec50'	20000	0.25	'E. coli JI132'	'Bacteria'	-0.60206	'Ivansk et al Anal Bioanal Chem (2010) 398:701–716'
'TiO2'	80	NaN	'30 min'	'luminescence inhbition'	'ec50'	20000	0.25	'E. coli JI132'	'Bacteria'	-0.60206	'Ivansk et al Anal Bioanal Chem (2010) 398:701–716'
'TiO2'	80	NaN	'2 h'	'Cytotoxicity assay'	'LD50'	1104	0.0138	'E.coli'	'Bacteria'	-1.86012	'Hu et al. Sci. Total Environ. 407 (2009) 3070–3072'
'TiO2'	80	12.6	'24 h'	'growth inhibition assay'	'IC50'	500	0.00625	'E.coli'	'Bacteria'	-2.20412	'Kaweeteerawat et al. Environ. Sci. Technol. 2015, 49, 1105−1112'
'TiO2'	80	NaN	'1.5 h'	'bioluminescence activity assay'	'EC50'	1000	0.0125	'E.coli'	'Bacteria'	-1.90309	'Ko et al. Appl Microbiol Biotechnol (2014) 98:3295–3303'
'TiO2'	80	42	'30 min'	'Cell viability assay CFU'	'LC50'	579.549	0.00724436	'E.coli'	'Bacteria'	-2.14	'Pathakoti et al. Journal of Photochemistry and Photobiology B: Biology 130 (2014) 234–240'
'TiO2'	80	NaN	'2 h'	'Cell viability assay CFU'	'EC50'	1455.76	0.018197	'E.coli'	'Bacteria'	-1.74	'Puzyn et al. Nature Nanotech 6, 175–178 (2011)'
'TiO2'	80	5	'4 h'	'growth inhibition assay'	'ec50'	NaN	NaN	'Escherichia Coli'	'Bacteria'	NaN	'Bondarenko et al. Nanotoxicology, 2016; 10(9): 1229–1242'
'TiO2'	80	5	'4 h'	'growth inhibition assay'	'ec50'	NaN	NaN	'Pseudomonas aeruginosa'	'Bacteria'	NaN	'Bondarenko et al. Nanotoxicology, 2016; 10(9): 1229–1242'
'TiO2'	80	5	'4 h'	'growth inhibition assay'	'ec50'	NaN	NaN	'Pseudomonas putida'	'Bacteria'	NaN	'Bondarenko et al. Nanotoxicology, 2016; 10(9): 1229–1242'
'TiO2'	80	5	'4 h'	'growth inhibition assay'	'ec50'	NaN	NaN	'Staphylococcus aureus'	'Bacteria'	NaN	'Bondarenko et al. Nanotoxicology, 2016; 10(9): 1229–1242'
'TiO2'	80	NaN	'30 min'	'bioluminescence inhibition assay'	'EC50'	20000	0.25	'Vibrio fischeri'	'Bacteria'	-0.60206	'Heinlaan et al. Chemosphere 2008; 71 (7) 1308-1316'
'TiO2'	80	5	'30 min'	'bioluminescence inhibition assay'	'ec50'	NaN	NaN	'Vibrio fischeri'	'Bacteria'	NaN	'Bondarenko et al. Nanotoxicology, 2016; 10(9): 1229–1242'
'V2O3'	150	NaN	'2 h'	'Cell viability assay CFU'	'EC50'	108.665	0.000724436	'E.coli'	'Bacteria'	-3.14	'Puzyn et al. Nature Nanotech 6, 175–178 (2011)'
'WO3'	232	NaN	'2 h'	'Cell Viability CFU assay'	'ec50'	2000	0.00862069	'E Coli'	'Bacteria'	-2.06446	'Kar et al. Chemosphere 264 (2021) 128428'
'WO3'	232	16.6	'24 h'	'growth inhibition assay'	'IC50'	NaN	NaN	'E.coli'	'Bacteria'	NaN	'Kaweeteerawat et al. Environ. Sci. Technol. 2015, 49, 1105−1112'
'WO3'	232	10.6	'30 min'	'luminescence inhbition'	'EC50'	87.07	0.000375302	'Vibrio Fischeri'	'Bacteria'	-3.42562	'Aruoja et al Environ. Sci.: Nano, 2015,2, 630-644'
'Y2O3'	226	32.7	'24 h'	'growth inhibition assay'	'IC50'	NaN	NaN	'E.coli'	'Bacteria'	NaN	'Kaweeteerawat et al. Environ. Sci. Technol. 2015, 49, 1105−1112'
'Y2O3'	226	38	'30 min'	'Cell viability assay CFU'	'LC50'	0.366529	1.62181e-06	'E.coli'	'Bacteria'	-5.79	'Pathakoti et al. Journal of Photochemistry and Photobiology B: Biology 130 (2014) 234–240'
'Y2O3'	226	NaN	'2 h'	'Cell viability assay CFU'	'EC50'	304.866	0.00134896	'E.coli'	'Bacteria'	-2.87	'Puzyn et al. Nature Nanotech 6, 175–178 (2011)'
'Yb2O3'	394	61.7	'24 h'	'growth inhibition assay'	'IC50'	NaN	NaN	'E.coli'	'Bacteria'	NaN	'Kaweeteerawat et al. Environ. Sci. Technol. 2015, 49, 1105−1112'
'Zn'	65	40	'15 min'	'bioluminescence inhibition assay'	'EC50'	20.5	0.000315385	'Vibrio Fischeri'	'Bacteria'	-3.50116	'Zhang et al. Environ Monit Assess (2020) 192: 484'
'ZnO'	81	13.6	'4 h'	'growth inhibition assay'	'ec50'	14	0.00017284	'Bacillus subtilis'	'Bacteria'	-3.76236	'Bondarenko et al. Nanotoxicology, 2016; 10(9): 1229–1242'
'ZnO'	81	NaN	'30 min'	'luminescence inhbition'	'ec50'	183	0.00225926	'E. coli AB1157'	'Bacteria'	-2.64603	'Ivansk et al Anal Bioanal Chem (2010) 398:701–716'
'ZnO'	81	NaN	'2 h'	'luminescence inhbition'	'ec50'	5.54	6.83951e-05	'E. coli AS391'	'Bacteria'	-4.16498	'Ivansk et al Anal Bioanal Chem (2010) 398:701–716'
'ZnO'	81	NaN	'2 h'	'luminescence inhbition'	'ec50'	86.8	0.0010716	'E. coli AS393'	'Bacteria'	-2.96997	'Ivansk et al Anal Bioanal Chem (2010) 398:701–716'
'ZnO'	81	NaN	'30 min'	'luminescence inhbition'	'ec50'	171	0.00211111	'E. coli AS393'	'Bacteria'	-2.67549	'Ivansk et al Anal Bioanal Chem (2010) 398:701–716'
'ZnO'	81	NaN	'2 h'	'luminescence inhbition'	'ec50'	89.1	0.0011	'E. coli JI130'	'Bacteria'	-2.95861	'Ivansk et al Anal Bioanal Chem (2010) 398:701–716'
'ZnO'	81	NaN	'30 min'	'luminescence inhbition'	'ec50'	234	0.00288889	'E. coli JI130'	'Bacteria'	-2.53927	'Ivansk et al Anal Bioanal Chem (2010) 398:701–716'
'ZnO'	81	NaN	'2 h'	'luminescence inhbition'	'ec50'	82.4	0.00101728	'E. coli JI131'	'Bacteria'	-2.99256	'Ivansk et al Anal Bioanal Chem (2010) 398:701–716'
'ZnO'	81	NaN	'30 min'	'luminescence inhbition'	'ec50'	196	0.00241975	'E. coli JI131'	'Bacteria'	-2.61623	'Ivansk et al Anal Bioanal Chem (2010) 398:701–716'
'ZnO'	81	NaN	'30 min'	'luminescence inhbition'	'ec50'	22.6	0.000279012	'E. coli JI132'	'Bacteria'	-3.55438	'Ivansk et al Anal Bioanal Chem (2010) 398:701–716'
'ZnO'	81	NaN	'2 h'	'Cytotoxicity assay'	'LD50'	21.1	0.000260494	'E.coli'	'Bacteria'	-3.5842	'Hu et al. Sci. Total Environ. 407 (2009) 3070–3072'
'ZnO'	81	22.6	'24 h'	'growth inhibition assay'	'IC50'	33	0.000407407	'E.coli'	'Bacteria'	-3.38997	'Kaweeteerawat et al. Environ. Sci. Technol. 2015, 49, 1105−1112'
'ZnO'	81	NaN	'1.5 h'	'bioluminescence activity assay'	'EC50'	1.1	1.35802e-05	'E.coli'	'Bacteria'	-4.86709	'Ko et al. Appl Microbiol Biotechnol (2014) 98:3295–3303'
'ZnO'	81	71	'30 min'	'Cell viability assay CFU'	'LC50'	0.128376	1.58489e-06	'E.coli'	'Bacteria'	-5.8	'Pathakoti et al. Journal of Photochemistry and Photobiology B: Biology 130 (2014) 234–240'
'ZnO'	81	13.6	'4 h'	'growth inhibition assay'	'ec50'	67	0.00082716	'Escherichia Coli'	'Bacteria'	-3.08241	'Bondarenko et al. Nanotoxicology, 2016; 10(9): 1229–1242'
'ZnO'	81	71	'30 min'	'Cytotoxicity assays'	'LC50'	0.13	1.60494e-06	'Escherichia Coli'	'Bacteria'	-5.79454	'Dasari et al. J Environ Sci, 2013;25(5):882-8'
'ZnO'	81	13.6	'4 h'	'growth inhibition assay'	'ec50'	69	0.000851852	'Pseudomonas putida'	'Bacteria'	-3.06964	'Bondarenko et al. Nanotoxicology, 2016; 10(9): 1229–1242'
'ZnO'	81	43	'96 h'	'growth inhibition assay'	'EC50'	1.51	1.8642e-05	'Soil bacterial community'	'Bacteria'	-4.72951	'Y. Zhai et al. Ecotoxicology and Environmental Safety 145 (2017) 349–359'
'ZnO'	81	150	'96 h'	'growth inhibition assay'	'EC50'	1.65	2.03704e-05	'Soil bacterial community'	'Bacteria'	-4.691	'Y. Zhai et al. Ecotoxicology and Environmental Safety 145 (2017) 349–360'
'ZnO'	81	20.4	'30 min'	'luminescence inhbition'	'EC50'	11.52	0.000142222	'Vibrio Fischeri'	'Bacteria'	-3.84703	'Aruoja et al Environ. Sci.: Nano, 2015,2, 630-644'
'ZnO'	81	13.6	'30 min'	'bioluminescence inhibition assay'	'ec50'	8.3	0.000102469	'Vibrio fischeri'	'Bacteria'	-3.98941	'Bondarenko et al. Nanotoxicology, 2016; 10(9): 1229–1242'
'ZnO'	81	NaN	'30 min'	'bioluminescence inhibition assay'	'EC50'	1.9	2.34568e-05	'Vibrio fischeri'	'Bacteria'	-4.62973	'Heinlaan et al. Chemosphere 2008; 71 (7) 1308-1316'
'ZnO'	81	NaN	'30 min'	'bioluminescence inhibition assay'	'EC50'	7.276	8.98272e-05	'Vibrio fischeri'	'Bacteria'	-4.04659	'Sovova et al., 2009, Proceedings,NANOCON Conference, Roznov , Czech Republic, pp 62‐71,'
'ZnO'	81	40	'15 min'	'bioluminescence inhibition assay'	'EC50'	11.6	0.00014321	'Vibrio Fischeri'	'Bacteria'	-3.84403	'Zhang et al. Environ Monit Assess (2020) 192: 484'
'ZnO'	81	NaN	'30 min'	'bioluminescence inhibition assay'	'ec50'	4.8	5.92593e-05	'Vibrio fischieri'	'Bacteria'	-4.22724	'Mortimer et al. Toxicology in Vitro 22 (2008) 1412–1417'
'ZrO2'	123	40.1	'24 h'	'growth inhibition assay'	'IC50'	500	0.00406504	'E.coli'	'Bacteria'	-2.39094	'Kaweeteerawat et al. Environ. Sci. Technol. 2015, 49, 1105−1112'
'ZrO2'	123	27	'30 min'	'Cell viability assay CFU'	'LC50'	323.523	0.00263027	'E.coli'	'Bacteria'	-2.58	'Pathakoti et al. Journal of Photochemistry and Photobiology B: Biology 130 (2014) 234–240'
'ZrO2'	123	NaN	'2 h'	'Cell viability assay CFU'	'EC50'	870.773	0.00707946	'E.coli'	'Bacteria'	-2.15	'Puzyn et al. Nature Nanotech 6, 175–178 (2011)'
Bacteria - Validation data
NP	Molar weight (g/mol)	Size	Exposure time	Assay	Endpoint	Value (mg/l	Value(mol/L)	Cell type	Cell group	Log(endpoint)	reference
'Ag'	108	NaN	'2 h'	'luminescence inhbition'	'ec50'	19.7	0.000182407	'E. coli AS393'	'Bacteria'	-3.73896	'Ivansk et al Anal Bioanal Chem (2010) 398:701–716'
'Ag'	108	NaN	'30 min'	'luminescence inhbition'	'ec50'	17.9	0.000165741	'E. coli JI132'	'Bacteria'	-3.78057	'Ivansk et al Anal Bioanal Chem (2010) 398:701–716'
'Ag'	108	20.4	'4 h'	'growth inhibition assay'	'ec50'	3.8	3.51852e-05	'Pseudomonas putida'	'Bacteria'	-4.45364	'Bondarenko et al. Nanotoxicology, 2016; 10(9): 1229–1242'
'Ag2O'	233	NaN	'16 h'	'growth inhibition CFU assay'	'IC50'	18	7.72532e-05	'B. circulans'	'Bacteria'	-4.11208	'Negi et al. J Gen Appl Microbiol. 2013;59(1):83-8'
'Al2O3'	102	14.7	'24 h'	'growth inhibition assay'	'IC50'	500	0.00490196	'E.coli'	'Bacteria'	-2.30963	'Kaweeteerawat et al. Environ. Sci. Technol. 2015, 49, 1105−1112'
'Al2O3'	102	55	'30 min'	'Cell viability assay CFU'	'LC50'	387.793	0.00380189	'E.coli'	'Bacteria'	-2.42	'Pathakoti et al. Journal of Photochemistry and Photobiology B: Biology 130 (2014) 234–240'
'Al2O3'	102	NaN	'2 h'	'Cell viability assay CFU'	'EC50'	330.066	0.00323594	'E.coli'	'Bacteria'	-2.49	'Puzyn et al. Nature Nanotech 6, 175–178 (2011)'
'Bi2O3'	466	144	'30 min'	'Cell viability assay CFU'	'LC50'	131.337	0.000281838	'E.coli'	'Bacteria'	-3.55	'Pathakoti et al. Journal of Photochemistry and Photobiology B: Biology 130 (2014) 234–240'
'Bi2O3'	466	NaN	'2 h'	'Cell viability assay CFU'	'EC50'	705.32	0.00151356	'E.coli'	'Bacteria'	-2.82	'Puzyn et al. Nature Nanotech 6, 175–178 (2011)'
'CuO'	79.545	30	'2 h'	'luminescence inhbition'	'ec50'	10.1	0.000126972	'E. coli AB1157'	'Bacteria'	-3.89629	'Ivansk et al Anal Bioanal Chem (2010) 398:701–716'
'CuO'	79.545	30	'2 h'	'luminescence inhbition'	'ec50'	2.53	3.18059e-05	'E. coli AS391'	'Bacteria'	-4.49749	'Ivansk et al Anal Bioanal Chem (2010) 398:701–716'
'CuO'	79.545	30	'30 min'	'luminescence inhbition'	'ec50'	11.4	0.000143315	'E. coli AS391'	'Bacteria'	-3.84371	'Ivansk et al Anal Bioanal Chem (2010) 398:701–716'
'CuO'	79.545	30	'30 min'	'luminescence inhbition'	'ec50'	33	0.00041486	'E. coli JI131'	'Bacteria'	-3.3821	'Ivansk et al Anal Bioanal Chem (2010) 398:701–716'
'CuO'	79.545	40	'15 min'	'bioluminescence inhibition assay'	'EC50'	118.7	0.00149224	'Vibrio Fischeri'	'Bacteria'	-2.82616	'Zhang et al. Environ Monit Assess (2020) 192: 484'
'Fe3O4'	232	12	'24 h'	'growth inhibition assay'	'IC50'	NaN	NaN	'E.coli'	'Bacteria'	NaN	'Kaweeteerawat et al. Environ. Sci. Technol. 2015, 49, 1105−1112'
'Ga2O3'	187	654	'5 days'	'Microtox bioassay'	'ec50'	NaN	NaN	'Methanogenic archaea'	'Bacteria'	NaN	'Nguyen et al. Journal of Environmental Science and Health, 2020 Part A, 55:2, 168-178'
'In2O3'	278	626	'5 days'	'Microtox bioassay'	'ec50'	NaN	NaN	'Methanogenic archaea'	'Bacteria'	NaN	'Nguyen et al. Journal of Environmental Science and Health, 2020 Part A, 55:2, 168-178'
'La2O3'	326	65	'30 min'	'Cell viability assay CFU'	'LC50'	3.57452	1.09648e-05	'E.coli'	'Bacteria'	-4.96	'Pathakoti et al. Journal of Photochemistry and Photobiology B: Biology 130 (2014) 234–240'
'La2O3'	326	NaN	'2 h'	'Cell viability assay CFU'	'EC50'	439.762	0.00134896	'E.coli'	'Bacteria'	-2.87	'Puzyn et al. Nature Nanotech 6, 175–178 (2011)'
'La2O3'	326	24.6	'24 h'	'growth inhibition assay'	'IC50'	NaN	NaN	'E.coli'	'Bacteria'	NaN	'Kaweeteerawat et al. Environ. Sci. Technol. 2015, 49, 1105−1112'
'Ni2O3'	165	140.6	'24 h'	'growth inhibition assay'	'IC50'	181	0.00109697	'E.coli'	'Bacteria'	-2.95981	'Kaweeteerawat et al. Environ. Sci. Technol. 2015, 49, 1105−1112'
'NiO'	75	14	'30 min'	'Cell viability assay CFU'	'LC50'	12.1636	0.000162181	'E.coli'	'Bacteria'	-3.79	'Pathakoti et al. Journal of Photochemistry and Photobiology B: Biology 130 (2014) 234–240'
'Pd'	106	100	'96 h'	'growth inhibition assay'	'EC50'	7.54	7.11321e-05	'Soil bacterial community'	'Bacteria'	-4.14793	'Y. Zhai et al. Ecotoxicology and Environmental Safety 145 (2017) 349–365'
'Pd'	106	15.1	'30 min'	'luminescence inhbition'	'EC50'	55.42	0.00052283	'Vibrio Fischeri'	'Bacteria'	-3.28164	'Aruoja et al Environ. Sci.: Nano, 2015,2, 630-644'
'Sb2O3'	292	84	'30 min'	'Cell viability assay CFU'	'LC50'	221.505	0.000758578	'E.coli'	'Bacteria'	-3.12	'Pathakoti et al. Journal of Photochemistry and Photobiology B: Biology 130 (2014) 234–240'
'SiO2'	60	NaN	'2 h'	'Cell viability assay CFU'	'EC50'	378.574	0.00630957	'E.coli'	'Bacteria'	-2.2	'Puzyn et al. Nature Nanotech 6, 175–178 (2011)'
'SiO2'	60	212	'4 h'	'growth inhibition assay'	'ec50'	NaN	NaN	'Pseudomonas aeruginosa'	'Bacteria'	NaN	'Bondarenko et al. Nanotoxicology, 2016; 10(9): 1229–1242'
'SiO2'	60	212	'4 h'	'growth inhibition assay'	'ec50'	NaN	NaN	'Staphylococcus aureus'	'Bacteria'	NaN	'Bondarenko et al. Nanotoxicology, 2016; 10(9): 1229–1242'
'SnO2'	151	NaN	'2 h'	'Cell viability assay CFU'	'EC50'	1475.63	0.00977237	'E.coli'	'Bacteria'	-2.01	'Puzyn et al. Nature Nanotech 6, 175–178 (2011)'
'TiO2'	80	NaN	'2 h'	'luminescence inhbition'	'ec50'	20000	0.25	'E. coli AS393'	'Bacteria'	-0.60206	'Ivansk et al Anal Bioanal Chem (2010) 398:701–716'
'TiO2'	80	42.3	'30 min'	'Cytotoxicity assays'	'LC50'	583	0.0072875	'Escherichia Coli'	'Bacteria'	-2.13742	'Dasari et al. J Environ Sci, 2013;25(5):882-8'
'V2O3'	150	NaN	'30 min'	'Cell viability assay CFU'	'LC50'	49.6697	0.000331131	'E.coli'	'Bacteria'	-3.48	'Pathakoti et al. Journal of Photochemistry and Photobiology B: Biology 130 (2014) 234–240'
'ZnO'	81	NaN	'2 h'	'luminescence inhbition'	'ec50'	67.2	0.00082963	'E. coli AB1157'	'Bacteria'	-3.08112	'Ivansk et al Anal Bioanal Chem (2010) 398:701–716'
'ZnO'	81	NaN	'30 min'	'luminescence inhbition'	'ec50'	13.4	0.000165432	'E. coli AS391'	'Bacteria'	-3.78138	'Ivansk et al Anal Bioanal Chem (2010) 398:701–716'
'ZnO'	81	NaN	'2 h'	'luminescence inhbition'	'ec50'	6.91	8.53086e-05	'E. coli JI132'	'Bacteria'	-4.06901	'Ivansk et al Anal Bioanal Chem (2010) 398:701–716'
'ZnO'	81	NaN	'2 h'	'Cell viability assay CFU'	'EC50'	28.7399	0.000354813	'E.coli'	'Bacteria'	-3.45	'Puzyn et al. Nature Nanotech 6, 175–178 (2011)'
'ZnO'	81	18	'96 h'	'growth inhibition assay'	'EC50'	1.34	1.65432e-05	'Soil bacterial community'	'Bacteria'	-4.78138	'Y. Zhai et al. Ecotoxicology and Environmental Safety 145 (2017) 349–358'
'ZnO'	81	13.6	'4 h'	'growth inhibition assay'	'ec50'	16	0.000197531	'Staphylococcus aureus'	'Bacteria'	-3.70437	'Bondarenko et al. Nanotoxicology, 2016; 10(9): 1229–1242'

## Sheet: Fish
Fish - Fold 1
NP	Molar weight (g/mol)	Size	Exposure time	Assay	Endpoint	Value (mg/l	Value(mol/L)	Cell type	Cell group	Log(endpoint)	reference
'Ag'	108	NaN	'48 h'	'Acute toxicity assay'	'LC50'	2.7	2.5e-05	'Danio rerio (eggs)'	'Fish'	-4.60206	'Kovrižnychet al. Interdisciplinary Toxicology. 2013; Vol. 6(2): 67–73'
'Ag'	108	10	'120 h'	'Acute toxicity (mortality)'	'LC50'	13.5713	0.00012566	'Danio rerio (embryos)'	'Fish'	-3.9008	'Bar-Ilan et al. Small 2009; 5 (16) 1897-1910'
'Ag'	108	20	'120 h'	'Fish embryo survival'	'LC50'	0.529	4.89815e-06	'Danio rerio embryos'	'Fish'	-5.30997	'Lacave et al. Nanotechnology 27 (2016) 325102'
'Ag'	108	40	'120 h'	'Fish embryo survival'	'LC50'	3.94	3.64815e-05	'Danio rerio embryos'	'Fish'	-4.43793	'Lacave et al. Nanotechnology 27 (2016) 325102'
'Ag'	108	100	'120 h'	'Fish embryo survival'	'LC50'	1.973	1.82685e-05	'Danio rerio embryos'	'Fish'	-4.7383	'Lacave et al. Nanotechnology 27 (2016) 325102'
'Al2O3'	102	80	'96 h'	'embryo-larval bioassay'	'LC50'	1000	0.00980392	'Danio rerio (embryos)'	'Fish'	-2.0086	'Zhu et al., J. Environ. Sci. Health A Tox. Hazard Subst. Environ. Eng. 2008; 43 (3) 278-286'
'Al2O3'	102	80	'84 h'	'embryo-larval bioassay'	'eC50'	1000	0.00980392	'Danio rerio (embryos)'	'Fish'	-2.0086	'Zhu et al., J. Environ. Sci. Health A Tox. Hazard Subst. Environ. Eng. 2008; 43 (3) 278-287'
'Au'	197	5	'120 h'	'Fish embryo survival'	'LC50'	24.655	0.000125152	'Danio rerio embryos'	'Fish'	-3.90256	'Lacave et al. Nanotechnology 27 (2016) 325102'
'Bi2O3'	466	NaN	'48 h'	'Acute toxicity assay'	'LC50'	1600	0.00343348	'Danio rerio (eggs)'	'Fish'	-2.46427	'Kovrižnychet al. Interdisciplinary Toxicology. 2013; Vol. 6(2): 67–73'
'Cu'	64	26.7	'48 h'	'static renewal assay'	'LC50'	0.94	1.46875e-05	'Danio rerio (adults)'	'Fish'	-4.83305	'Griffit et al. Environm. Toxicol. Chem. 2008; 27 (9) 1972–1978'
'CuO'	79.545	NaN	'48 h'	'Acute toxicity assay'	'LC50'	12.5	0.000157144	'Danio rerio (adults)'	'Fish'	-3.8037	'Kovrižnychet al. Interdisciplinary Toxicology. 2013; Vol. 6(2): 67–73'
'SiO2'	60	70	'120 h'	'Fish embryo survival'	'LC50'	83.33	0.00138883	'Danio rerio embryos'	'Fish'	-2.85735	'Lacave et al. Nanotechnology 27 (2016) 325102'
'SiO2'	60	70	'24 h'	'MTT assay'	'LC50'	NaN	NaN	'gill cells'	'Fish'	NaN	'Katsumiti et al. Nanotoxicology. 2016;10(2):185-98'
'ZnO'	81	NaN	'120 h'	'Fish embryo survival'	'LC50'	5.538	6.83704e-05	'Danio rerio embryos'	'Fish'	-4.16513	'Lacave et al. Nanotechnology 27 (2016) 325102'
	Fish - Fold 2
NP	Molar weight (g/mol)	Size	Exposure time	Assay	Endpoint	Value (mg/l	Value(mol/L)	Cell type	Cell group	Log(endpoint)	reference
'Bi2O3'	466	NaN	'48 h'	'Acute toxicity assay'	'LC50'	1600	0.00343348	'Danio rerio (adults)'	'Fish'	-2.46427	'Kovrižnychet al. Interdisciplinary Toxicology. 2013; Vol. 6(2): 67–73'
'CaO'	56	NaN	'48 h'	'Acute toxicity assay'	'LC50'	290	0.00517857	'Danio rerio (eggs)'	'Fish'	-2.28579	'Kovrižnychet al. Interdisciplinary Toxicology. 2013; Vol. 6(2): 67–73'
'Cr2O3'	152	NaN	'48 h'	'Acute toxicity assay'	'LC50'	1600	0.0105263	'Danio rerio (adults)'	'Fish'	-1.97772	'Kovrižnychet al. Interdisciplinary Toxicology. 2013; Vol. 6(2): 67–73'
'Cr2O3'	152	NaN	'48 h'	'Acute toxicity assay'	'LC50'	1600	0.0105263	'Danio rerio (eggs)'	'Fish'	-1.97772	'Kovrižnychet al. Interdisciplinary Toxicology. 2013; Vol. 6(2): 67–73'
'Cu'	64	NaN	'48 h'	'Acute toxicity assay'	'LC50'	24	0.000375	'Danio rerio (eggs)'	'Fish'	-3.42597	'Kovrižnychet al. Interdisciplinary Toxicology. 2013; Vol. 6(2): 67–73'
'Cu'	64	26.7	'48 h'	'static renewal assay'	'LC50'	0.71	1.10938e-05	'Danio rerio (juvenile)'	'Fish'	-4.95492	'Griffit et al. Environm. Toxicol. Chem. 2008; 27 (9) 1972–1978'
'NiO'	75	NaN	'48 h'	'Acute toxicity assay'	'LC50'	200	0.00266667	'Danio rerio (adults)'	'Fish'	-2.57403	'Kovrižnychet al. Interdisciplinary Toxicology. 2013; Vol. 6(2): 67–73'
'SiO2'	60	NaN	'48 h'	'Acute toxicity assay'	'LC50'	1600	0.0266667	'Danio rerio (adults)'	'Fish'	-1.57403	'Kovrižnychet al. Interdisciplinary Toxicology. 2013; Vol. 6(2): 67–73'
'SiO2'	60	15	'120 h'	'Fish embryo survival'	'LC50'	NaN	NaN	'Danio rerio embryos'	'Fish'	NaN	'Lacave et al. Nanotechnology 27 (2016) 325102'
'SiO2'	60	27	'24 h'	'MTT assay'	'LC50'	NaN	NaN	'gill cells'	'Fish'	NaN	'Katsumiti et al. Nanotoxicology. 2016;10(2):185-99'
'Sn'	119	NaN	'48 h'	'Acute toxicity assay'	'LC50'	800	0.00672269	'Danio rerio (eggs)'	'Fish'	-2.17246	'Kovrižnychet al. Interdisciplinary Toxicology. 2013; Vol. 6(2): 67–73'
'TiO2'	80	NaN	'84 h'	'embryo-larval bioassay'	'eC50'	500	0.00625	'Danio rerio (embryos)'	'Fish'	-2.20412	'Zhu et al., J. Environ. Sci. Health A Tox. Hazard Subst. Environ. Eng. 2008; 43 (3) 278-289'
'WO3'	232	NaN	'48 h'	'Acute toxicity assay'	'LC50'	1600	0.00689655	'Danio rerio (eggs)'	'Fish'	-2.16137	'Kovrižnychet al. Interdisciplinary Toxicology. 2013; Vol. 6(2): 67–73'
'ZnO'	81	NaN	'120 h'	'Fish embryo survival'	'LC50'	4.289	5.29506e-05	'Danio rerio embryos'	'Fish'	-4.27613	'Lacave et al. Nanotechnology 27 (2016) 325102'
'ZnO'	81	NaN	'24 h'	'MTT assay'	'LC50'	4.04	4.77778e-05	'gill cells'	'Fish'	-4.32077	'Katsumiti et al. Nanotoxicology. 2016;10(2):185-102'
	Fish - Fold 3
NP	Molar weight (g/mol)	Size	Exposure time	Assay	Endpoint	Value (mg/l	Value(mol/L)	Cell type	Cell group	Log(endpoint)	reference
'Ag'	108	26.6	'48 h'	'static renewal assay'	'LC50'	7.07	6.5463e-05	'Danio rerio (adults)'	'Fish'	-4.184	'Griffit et al. Environm. Toxicol. Chem. 2008; 27 (9) 1972–1978'
'Ag'	108	3	'120 h'	'Acute toxicity (mortality)'	'LC50'	10.0775	9.331e-05	'Danio rerio (embryos)'	'Fish'	-4.03007	'Bar-Ilan et al. Small 2009; 5 (16) 1897-1910'
'Au'	197	40	'120 h'	'Fish embryo survival'	'LC50'	34.717	0.000176228	'Danio rerio embryos'	'Fish'	-3.75392	'Lacave et al. Nanotechnology 27 (2016) 325102'
'CaO'	56	NaN	'48 h'	'Acute toxicity assay'	'LC50'	260	0.00464286	'Danio rerio (adults)'	'Fish'	-2.33321	'Kovrižnychet al. Interdisciplinary Toxicology. 2013; Vol. 6(2): 67–73'
'Cu'	64	NaN	'48 h'	'Acute toxicity assay'	'LC50'	4.2	6.5625e-05	'Danio rerio (adults)'	'Fish'	-4.18293	'Kovrižnychet al. Interdisciplinary Toxicology. 2013; Vol. 6(2): 67–73'
'Fe2O3'	160	NaN	'48 h'	'Acute toxicity assay'	'LC50'	1600	0.01	'Danio rerio (eggs)'	'Fish'	-2	'Kovrižnychet al. Interdisciplinary Toxicology. 2013; Vol. 6(2): 67–73'
'MgO'	40	NaN	'48 h'	'Acute toxicity assay'	'LC50'	140	0.0035	'Danio rerio (adults)'	'Fish'	-2.45593	'Kovrižnychet al. Interdisciplinary Toxicology. 2013; Vol. 6(2): 67–73'
'Sn'	119	NaN	'48 h'	'Acute toxicity assay'	'LC50'	800	0.00672269	'Danio rerio (adults)'	'Fish'	-2.17246	'Kovrižnychet al. Interdisciplinary Toxicology. 2013; Vol. 6(2): 67–73'
'SnO2'	151	NaN	'48 h'	'Acute toxicity assay'	'LC50'	1600	0.010596	'Danio rerio (eggs)'	'Fish'	-1.97486	'Kovrižnychet al. Interdisciplinary Toxicology. 2013; Vol. 6(2): 67–73'
'WO3'	232	NaN	'48 h'	'Acute toxicity assay'	'LC50'	1600	0.00689655	'Danio rerio (adults)'	'Fish'	-2.16137	'Kovrižnychet al. Interdisciplinary Toxicology. 2013; Vol. 6(2): 67–73'
'ZnO'	81	8.35	'5 days'	'embryonic zebrafish bioassayA'	'LC50'	9.1	0.000112346	'Danio rerio (embryos)'	'Fish'	-3.94944	'Wehmas et al. Toxicology Reports 2 (2015) 702–717'
'ZnO'	81	8.35	'4 days'	'larval zebrafish bioassay'	'LC50'	3.5	4.32099e-05	'Danio rerio (embryos)'	'Fish'	-4.36442	'Wehmas et al. Toxicology Reports 2 (2015) 702–717'
'ZnO'	81	20	'96 h'	'embryo-larval bioassay'	'LC50'	1.78401	2.20249e-05	'Danio rerio (embryos)'	'Fish'	-4.65709	'Zhu et al., J. Environ. Sci. Health A Tox. Hazard Subst. Environ. Eng. 2008; 43 (3) 278-284'
'ZnO'	81	20	'84 h'	'embryo-larval bioassay'	'eC50'	2.05465	2.53661e-05	'Danio rerio (embryos)'	'Fish'	-4.59575	'Zhu et al., J. Environ. Sci. Health A Tox. Hazard Subst. Environ. Eng. 2008; 43 (3) 278-285'
'ZnO'	81	NaN	'24 h'	'MTT assay'	'LC50'	38.296	0.000487457	'gill cells'	'Fish'	-3.31206	'Katsumiti et al. Nanotoxicology. 2016;10(2):185-101'
Fish - Fold 4
NP	Molar weight (g/mol)	Size	Exposure time	Assay	Endpoint	Value (mg/l	Value(mol/L)	Cell type	Cell group	Log(endpoint)	reference
'Ag'	108	NaN	'48 h'	'Acute toxicity assay'	'LC50'	2.9	2.68519e-05	'Danio rerio (adults)'	'Fish'	-4.57103	'Kovrižnychet al. Interdisciplinary Toxicology. 2013; Vol. 6(2): 67–73'
'Ag'	108	100	'120 h'	'Acute toxicity (mortality)'	'LC50'	14.8241	0.00013726	'Danio rerio (embryos)'	'Fish'	-3.86246	'Bar-Ilan et al. Small 2009; 5 (16) 1897-1910'
'Ag'	108	26.6	'48 h'	'static renewal assay'	'LC50'	7.2	6.66667e-05	'Danio rerio (juvenile)'	'Fish'	-4.17609	'Griffit et al. Environm. Toxicol. Chem. 2008; 27 (9) 1972–1978'
'Ag'	108	20.4	'96 h'	'Lethal malformations'	'ec50'	3	2.77778e-05	'zebrafish (danio rerio)'	'Fish'	-4.5563	'Bondarenko et al. Nanotoxicology, 2016; 10(9): 1229–1242'
'CuO'	79.545	25	'24 h'	'metabolic activity (alamarBlue® assay'	'ec50'	5.95	7.48004e-05	'RTgutGC'	'Fish'	-4.1261	'Geppert et al. Environ. Sci.: Nano, 2021,8, 2249-2260'
'CuO'	79.545	24.5	'96 h'	'Lethal malformations'	'ec50'	1.6	2.01144e-05	'zebrafish (danio rerio)'	'Fish'	-4.69649	'Bondarenko et al. Nanotoxicology, 2016; 10(9): 1229–1242'
'MgO'	40	NaN	'48 h'	'Acute toxicity assay'	'LC50'	3200	0.08	'Danio rerio (eggs)'	'Fish'	-1.09691	'Kovrižnychet al. Interdisciplinary Toxicology. 2013; Vol. 6(2): 67–73'
'SiO2'	60	15	'24 h'	'MTT assay'	'LC50'	NaN	NaN	'gill cells'	'Fish'	NaN	'Katsumiti et al. Nanotoxicology. 2016;10(2):185-96'
'SiO2'	60	30	'24 h'	'MTT assay'	'LC50'	NaN	NaN	'gill cells'	'Fish'	NaN	'Katsumiti et al. Nanotoxicology. 2016;10(2):185-97'
'SnO2'	151	NaN	'48 h'	'Acute toxicity assay'	'LC50'	1600	0.010596	'Danio rerio (adults)'	'Fish'	-1.97486	'Kovrižnychet al. Interdisciplinary Toxicology. 2013; Vol. 6(2): 67–73'
'TiO2'	80	NaN	'96 h'	'embryo-larval bioassay'	'LC50'	500	0.00625	'Danio rerio (embryos)'	'Fish'	-2.20412	'Zhu et al., J. Environ. Sci. Health A Tox. Hazard Subst. Environ. Eng. 2008; 43 (3) 278-288'
'TiO2'	80	NaN	'24 h'	'metabolic activity (alamarBlue® assay'	'ec50'	NaN	NaN	'RTgutGC'	'Fish'	NaN	'Geppert et al. Environ. Sci.: Nano, 2021,8, 2249-2260'
'W'	184	NaN	'48 h'	'Acute toxicity assay'	'LC50'	1600	0.00869565	'Danio rerio (adults)'	'Fish'	-2.0607	'Kovrižnychet al. Interdisciplinary Toxicology. 2013; Vol. 6(2): 67–73'
'W'	184	NaN	'48 h'	'Acute toxicity assay'	'LC50'	1600	0.00869565	'Danio rerio (eggs)'	'Fish'	-2.0607	'Kovrižnychet al. Interdisciplinary Toxicology. 2013; Vol. 6(2): 67–73'
'ZnO'	81	14	'24 h'	'metabolic activity (alamarBlue® assay'	'ec50'	100	0.00123457	'RTgutGC'	'Fish'	-2.90849	'Geppert et al. Environ. Sci.: Nano, 2021,8, 2249-2260'
Fish - Fold 5
NP	Molar weight (g/mol)	Size	Exposure time	Assay	Endpoint	Value (mg/l	Value(mol/L)	Cell type	Cell group	Log(endpoint)	reference
'Ag'	108	50	'120 h'	'Acute toxicity (mortality)'	'LC50'	13.7117	0.00012696	'Danio rerio (embryos)'	'Fish'	-3.89633	'Bar-Ilan et al. Small 2009; 5 (16) 1897-1910'
'Ag'	108	20	'24 h'	'metabolic activity (alamarBlue® assay'	'ec50'	15	0.000138889	'RTgutGC'	'Fish'	-3.85733	'Geppert et al. Environ. Sci.: Nano, 2021,8, 2249-2260'
'Al2O3'	102	NaN	'48 h'	'Acute toxicity assay'	'LC50'	800	0.00784314	'Danio rerio (adults)'	'Fish'	-2.10551	'Kovrižnychet al. Interdisciplinary Toxicology. 2013; Vol. 6(2): 67–73'
'Al2O3'	102	NaN	'48 h'	'Acute toxicity assay'	'LC50'	800	0.00784314	'Danio rerio (eggs)'	'Fish'	-2.10551	'Kovrižnychet al. Interdisciplinary Toxicology. 2013; Vol. 6(2): 67–73'
'Au'	197	15	'120 h'	'Fish embryo survival'	'LC50'	24.61	0.000124924	'Danio rerio embryos'	'Fish'	-3.90335	'Lacave et al. Nanotechnology 27 (2016) 325102'
'CuO'	79.545	NaN	'48 h'	'Acute toxicity assay'	'LC50'	960	0.0120686	'Danio rerio (eggs)'	'Fish'	-1.91834	'Kovrižnychet al. Interdisciplinary Toxicology. 2013; Vol. 6(2): 67–73'
'Fe2O3'	160	NaN	'48 h'	'Acute toxicity assay'	'LC50'	1600	0.01	'Danio rerio (adults)'	'Fish'	-2	'Kovrižnychet al. Interdisciplinary Toxicology. 2013; Vol. 6(2): 67–73'
'NiO'	75	NaN	'48 h'	'Acute toxicity assay'	'LC50'	800	0.0106667	'Danio rerio (eggs)'	'Fish'	-1.97197	'Kovrižnychet al. Interdisciplinary Toxicology. 2013; Vol. 6(2): 67–73'
'SiO2'	60	NaN	'48 h'	'Acute toxicity assay'	'LC50'	1600	0.0266667	'Danio rerio (eggs)'	'Fish'	-1.57403	'Kovrižnychet al. Interdisciplinary Toxicology. 2013; Vol. 6(2): 67–73'
'SiO2'	60	30	'120 h'	'Fish embryo survival'	'LC50'	NaN	NaN	'Danio rerio embryos'	'Fish'	NaN	'Lacave et al. Nanotechnology 27 (2016) 325102'
'TiO2'	80	NaN	'48 h'	'Acute toxicity assay'	'LC50'	1600	0.02	'Danio rerio (adults)'	'Fish'	-1.69897	'Kovrižnychet al. Interdisciplinary Toxicology. 2013; Vol. 6(2): 67–73'
'TiO2'	80	NaN	'48 h'	'Acute toxicity assay'	'LC50'	1600	0.02	'Danio rerio (eggs)'	'Fish'	-1.69897	'Kovrižnychet al. Interdisciplinary Toxicology. 2013; Vol. 6(2): 67–73'
'TiO2'	80	5	'96 h'	'Lethal malformations'	'ec50'	NaN	NaN	'zebrafish (danio rerio)'	'Fish'	NaN	'Bondarenko et al. Nanotoxicology, 2016; 10(9): 1229–1242'
'ZnO'	81	NaN	'24 h'	'MTT assay'	'LC50'	12.7	0.000165568	'gill cells'	'Fish'	-3.78102	'Katsumiti et al. Nanotoxicology. 2016;10(2):185-100'

## Sheet: Eukaryotes
Eukaryotes - Fold 1
NP	Molar weight (g/mol)	Size	Exposure time	Assay	Endpoint	Value (mg/l	Value(mol/L)	Cell type	Cell group	Log(endpoint)	reference
'TiO2'	80	5.1	'48 h'	'Static acute toxicity'	'LC50'	7215.2	0.09019	'P. multimicronucleatum'	'Eukaryotes & Microalgae'	-1.04484	'Li et al. 2012, Chem. Res. Toxicol, 25, 1675−1681'
'ZnO'	81	9.8	'48 h'	'Static acute toxicity'	'LC50'	573.8	0.00708395	'P. multimicronucleatum'	'Eukaryotes & Microalgae'	-2.14972	'Li et al. 2012, Chem. Res. Toxicol, 25, 1675−1681'
'ZnO'	81	NaN	'8 h'	'Cell Viability CFU assay'	'EC50'	121	0.00149383	'Saccharomyces cerevisiae S288C'	'Eukaryotes & Microalgae'	-2.8257	'Kasemets et al. Toxicol. In Vitro 2009; 23 (6) 1116-1122'
'ZnO'	81	NaN	'24 h'	'Cell Viability CFU assay'	'EC50'	131	0.00161728	'Saccharomyces cerevisiae S288C'	'Eukaryotes & Microalgae'	-2.79121	'Kasemets et al. Toxicol. In Vitro 2009; 23 (6) 1116-1122'
'TiO2'	80	5	'24 h'	'Viability assay'	'ec50'	NaN	NaN	'Tetrahymena thermophila'	'Eukaryotes & Microalgae'	NaN	'Bondarenko et al. Nanotoxicology, 2016; 10(9): 1229–1242'
'ZnO'	81	20.4	'24 h'	'Viability assay'	'EC50'	1.84	2.2716e-05	'Tetrahymena thermophila'	'Eukaryotes & Microalgae'	-4.64367	'Aruoja et al Environ. Sci.: Nano, 2015,2, 630-644'
'ZnO'	81	70	'24 h'	'growth inhibition test (Protoxkit)'	'EC50'	26.5	0.00032716	'Tetrahymena thermophila'	'Eukaryotes & Microalgae'	-3.48524	'Blinova et al. / Environmental Pollution 158 (2010) 41–4744'
'Ag'	108	30	'6 h'	'Cytotoxicity assay'	'EC50'	3.86	3.57407e-05	'Saccharomyces cerevisae'	'Eukaryotes & Microalgae'	-4.44684	'Zhang et al., J Nanopart Res (2016) 18 (2), 372'
'CuO'	80	20	'6 h'	'Cytotoxicity assay'	'EC50'	11.38	0.00014225	'Saccharomyces cerevisae'	'Eukaryotes & Microalgae'	-3.84695	'Zhang et al., J Nanopart Res (2016) 18 (2), 372'
'TiO2'	80	NaN	'20 h'	'Growth inhibition (PromoKine Cell Viability Kit)\'	'IC50'	NaN	NaN	'Tetrahymena Thermophila'	'Eukaryotes & Microalgae'	NaN	'Ud Daula et al., Journal of Environmental Science and Health, Part A (2013) 48, 1343–1348'
'CeO2'	172	50	'10 h'	'Activity inhibition'	'IC50'	1000	0.00581395	'Saccharomyces cerevisae'	'Eukaryotes & Microalgae'	-2.23553	'García-Saucedo et al. / Journal of Hazardous Materials 192 (2011) 1572–1579'
'SiO2'	60	NaN	'10 h'	'FungaLight kit, membrane damage assay'	'EC50'	1000	0.0166667	'Saccharomyces cerevisae'	'Eukaryotes & Microalgae'	-1.77815	'García-Saucedo et al. / Journal of Hazardous Materials 192 (2011) 1572–1579'
'Fe2O3'	160	NaN	'10 h'	'FungaLight kit, membrane damage assay'	'EC50'	1000	0.00625	'Saccharomyces cerevisae'	'Eukaryotes & Microalgae'	-2.20412	'Otero-González et al. / Chemosphere 93 (2013) 1201–1206'
	Eukaryotes - Fold 2
NP	Molar weight (g/mol)	Size	Exposure time	Assay	Endpoint	Value (mg/l	Value(mol/L)	Cell type	Cell group	Log(endpoint)	reference
'CuO'	79.545	13.3	'48 h'	'Static acute toxicity'	'LC50'	0.98	1.23201e-05	'P. multimicronucleatum'	'Eukaryotes & Microalgae'	-4.90939	'Li et al. 2012, Chem. Res. Toxicol, 25, 1675−1681'
'Fe3o4'	232	NaN	'12 h'	'PI strain assay'	'EC50'	1353	0.0058319	'Saccharomyces cerevisae'	'Eukaryotes & Microalgae'	-2.23419	'Peng et al., Chemico-Biological Interactions,287,2018, 20-26,'
'Fe3o4'	232	NaN	'12h'	'ATP assay'	'EC50'	800	0.00344828	'Saccharomyces cerevisae'	'Eukaryotes & Microalgae'	-2.4624	'Peng et al., Chemico-Biological Interactions,287,2018, 20-26,'
'CuO'	80	30	'24 h'	'Cell Viability CFU assay'	'EC50'	13.4	0.0001675	'Saccharomyces cerevisiae S288C'	'Eukaryotes & Microalgae'	-3.77599	'Kasemets et al. Toxicol. In Vitro 2009; 23 (6) 1116-1122'
'Co'	59	30	'96 h'	'growth inhibition assay'	'EC50'	21.5	0.000364407	'Skeletonema costatum'	'Eukaryotes & Microalgae'	-3.43841	'X. Chen et al. Environmental Pollution 236 (2018) 454e461'
'MgO'	40	13.6	'24 h'	'Viability assay'	'EC50'	NaN	NaN	'Tetrahymena thermophila'	'Eukaryotes & Microalgae'	NaN	'Aruoja et al Environ. Sci.: Nano, 2015,2, 630-644'
'Ag'	108	30	'48 h'	'Cytotoxicity assay'	'EC50'	0.45	4.16667e-06	'Saccharomyces cerevisae'	'Eukaryotes & Microalgae'	-5.38021	'Zhang et al., J Nanopart Res (2016) 18 (2), 372'
'ZnO'	81	20	'48 h'	'Cytotoxicity assay'	'EC50'	3.13	3.8642e-05	'Saccharomyces cerevisae'	'Eukaryotes & Microalgae'	-4.41294	'Zhang et al., J Nanopart Res (2016) 18 (2), 372'
'TiO2'	80	NaN	'6 h'	'Cytotoxicity assay (WST-8)'	'EC50'	NaN	NaN	'Tetrahymena Thermophila'	'Eukaryotes & Microalgae'	NaN	'Ud Daula et al., Journal of Environmental Science and Health, Part A (2013) 48, 1343–1348'
'HfO2'	210	100	'10 h'	'Activity inhibition'	'IC50'	1000	0.0047619	'Saccharomyces cerevisae'	'Eukaryotes & Microalgae'	-2.32222	'García-Saucedo et al. / Journal of Hazardous Materials 192 (2011) 1572–1579'
'SiO2'	60	NaN	'10 h'	'Activity inhibition'	'IC50'	1000	0.0166667	'Saccharomyces cerevisae'	'Eukaryotes & Microalgae'	-1.77815	'García-Saucedo et al. / Journal of Hazardous Materials 192 (2011) 1572–1579'
'TiO2'	80	21	'10 h'	'Activity inhibition'	'IC50'	1000	0.0125	'Saccharomyces cerevisae'	'Eukaryotes & Microalgae'	-1.90309	'Otero-González et al. / Chemosphere 93 (2013) 1201–1206'
'ZrO2'	123	NaN	'10 h'	'Activity inhibition'	'IC50'	1000	0.00813008	'Saccharomyces cerevisae'	'Eukaryotes & Microalgae'	-2.08991	'Otero-González et al. / Chemosphere 93 (2013) 1201–1206'
'Mn2O3'	158	NaN	'10 h'	'FungaLight kit, membrane damage assay'	'EC50'	1000	0.00632911	'Saccharomyces cerevisae'	'Eukaryotes & Microalgae'	-2.19866	'Otero-González et al. / Chemosphere 93 (2013) 1201–1206'
	Eukaryotes - Fold 3
NP	Molar weight (g/mol)	Size	Exposure time	Assay	Endpoint	Value (mg/l	Value(mol/L)	Cell type	Cell group	Log(endpoint)	reference
'Co3O4'	241	NaN	'72 h'	'Growth inhibition assay'	'EC50'	38.16	0.00015834	'C. minutissima'	'Eukaryotes & Microalgae'	-3.80041	'Sharan et al. Aquatic Toxicology 224 (2020) 105498'
'Co'	59	30	'96 h'	'growth inhibition assay'	'EC50'	38.6	0.000654237	'Chaetoceros curvisetus'	'Eukaryotes & Microalgae'	-3.18426	'X. Chen et al. Environmental Pollution 236 (2018) 454e461'
'Fe2O3'	160	4.7	'48 h'	'Static acute toxicity'	'LC50'	0.81	5.0625e-06	'P. multimicronucleatum'	'Eukaryotes & Microalgae'	-5.29563	'Li et al. 2012, Chem. Res. Toxicol, 25, 1675−1681'
'TiO2'	80	NaN	'8 h'	'Cell Viability CFU assay'	'EC50'	20000	0.25	'Saccharomyces cerevisiae S288C'	'Eukaryotes & Microalgae'	-0.60206	'Kasemets et al. Toxicol. In Vitro 2009; 23 (6) 1116-1122'
'CuO'	80	13.1	'24 h'	'Viability assay'	'EC50'	2	2.5e-05	'Tetrahymena thermophila'	'Eukaryotes & Microalgae'	-4.60206	'Aruoja et al Environ. Sci.: Nano, 2015,2, 630-644'
'SiO2'	60	212	'24 h'	'Viability assay'	'ec50'	NaN	NaN	'Tetrahymena thermophila'	'Eukaryotes & Microalgae'	NaN	'Bondarenko et al. Nanotoxicology, 2016; 10(9): 1229–1242'
'ZnO'	81	70	'24 h'	'growth inhibition test (Protoxkit)'	'EC50'	9.4	0.000116049	'Tetrahymena thermophila'	'Eukaryotes & Microalgae'	-3.93536	'Blinova et al. / Environmental Pollution 158 (2010) 41–4744'
'ZnO'	81	70	'24 h'	'growth inhibition test (Protoxkit)'	'EC50'	16.4	0.000202469	'Tetrahymena thermophila'	'Eukaryotes & Microalgae'	-3.69364	'Blinova et al. / Environmental Pollution 158 (2010) 41–4744'
'HfO2'	210	100	'10 h'	'Activity inhibition'	'IC50'	1000	0.0047619	'Saccharomyces cerevisae'	'Eukaryotes & Microalgae'	-2.32222	'García-Saucedo et al. / Journal of Hazardous Materials 192 (2011) 1572–1579'
'Al2O3'	102	50	'10 h'	'Activity inhibition'	'IC50'	1000	0.00980392	'Saccharomyces cerevisae'	'Eukaryotes & Microalgae'	-2.0086	'García-Saucedo et al. / Journal of Hazardous Materials 192 (2011) 1572–1579'
'Al2O3'	102	50	'10 h'	'Activity inhibition'	'IC50'	1000	0.00980392	'Saccharomyces cerevisae'	'Eukaryotes & Microalgae'	-2.0086	'García-Saucedo et al. / Journal of Hazardous Materials 192 (2011) 1572–1579'
'TiO2'	80	21	'10 h'	'Activity inhibition'	'IC50'	1000	0.0125	'Saccharomyces cerevisae'	'Eukaryotes & Microalgae'	-1.90309	'Otero-González et al. / Chemosphere 93 (2013) 1201–1206'
'Fe2O3'	160	NaN	'10 h'	'Activity inhibition'	'IC50'	1000	0.00625	'Saccharomyces cerevisae'	'Eukaryotes & Microalgae'	-2.20412	'Otero-González et al. / Chemosphere 93 (2013) 1201–1206'
'ZrO2'	123	NaN	'10 h'	'FungaLight kit, membrane damage assay'	'EC50'	1000	0.00813008	'Saccharomyces cerevisae'	'Eukaryotes & Microalgae'	-2.08991	'Otero-González et al. / Chemosphere 93 (2013) 1201–1206'
Eukaryotes - Fold 4
NP	Molar weight (g/mol)	Size	Exposure time	Assay	Endpoint	Value (mg/l	Value(mol/L)	Cell type	Cell group	Log(endpoint)	reference
'CeO2'	172	5.5	'48 h'	'Static acute toxicity'	'LC50'	1832.5	0.0106541	'P. multimicronucleatum'	'Eukaryotes & Microalgae'	-1.97248	'Li et al. 2012, Chem. Res. Toxicol, 25, 1675−1681'
'Fe3o4'	232	NaN	'12h'	'growth inhibition assay'	'IC50'	800	0.00344828	'Saccharomyces cerevisae'	'Eukaryotes & Microalgae'	-2.4624	'Peng et al., Chemico-Biological Interactions,287,2018, 20-26,'
'Ag'	108	20.4	'24 h'	'Viability assay'	'ec50'	3.9	3.61111e-05	'Tetrahymena thermophila'	'Eukaryotes & Microalgae'	-4.44236	'Bondarenko et al. Nanotoxicology, 2016; 10(9): 1229–1242'
'TiO2'	80	12.2	'24 h'	'Viability assay'	'EC50'	52.62	0.00065775	'Tetrahymena thermophila'	'Eukaryotes & Microalgae'	-3.18194	'Aruoja et al Environ. Sci.: Nano, 2015,2, 630-644'
'ZnO'	81	70	'24 h'	'growth inhibition test (Protoxkit)'	'EC50'	12.4	0.000153086	'Tetrahymena thermophila'	'Eukaryotes & Microalgae'	-3.81506	'Blinova et al. / Environmental Pollution 158 (2010) 41–4744'
'ZnO'	81	13.6	'24 h'	'Viability assay'	'ec50'	3.9	4.81481e-05	'Tetrahymena thermophila'	'Eukaryotes & Microalgae'	-4.31742	'Bondarenko et al. Nanotoxicology, 2016; 10(9): 1229–1242'
'CuO'	80	20	'48 h'	'Cytotoxicity assay'	'EC50'	1.07	1.3375e-05	'Saccharomyces cerevisae'	'Eukaryotes & Microalgae'	-4.87371	'Zhang et al., J Nanopart Res (2016) 18 (2), 372'
'ZnO'	81	20	'6 h'	'Cytotoxicity assay'	'EC50'	8.83	0.000109012	'Saccharomyces cerevisae'	'Eukaryotes & Microalgae'	-3.96252	'Zhang et al., J Nanopart Res (2016) 18 (2), 372'
'TiO2'	80	NaN	'40 h'	'Growth inhibition (PromoKine Cell Viability Kit)\'	'IC50'	NaN	NaN	'Tetrahymena Thermophila'	'Eukaryotes & Microalgae'	NaN	'Ud Daula et al., Journal of Environmental Science and Health, Part A (2013) 48, 1343–1348'
'CeO2'	172	50	'10 h'	'Activity inhibition'	'IC50'	1000	0.00581395	'Saccharomyces cerevisae'	'Eukaryotes & Microalgae'	-2.23553	'García-Saucedo et al. / Journal of Hazardous Materials 192 (2011) 1572–1579'
'CeO2'	172	50	'10 h'	'FungaLight kit, membrane damage assay'	'EC50'	1000	0.00581395	'Saccharomyces cerevisae'	'Eukaryotes & Microalgae'	-2.23553	'García-Saucedo et al. / Journal of Hazardous Materials 192 (2011) 1572–1579'
'HfO2'	210	100	'10 h'	'FungaLight kit, membrane damage assay'	'EC50'	1000	0.0047619	'Saccharomyces cerevisae'	'Eukaryotes & Microalgae'	-2.32222	'García-Saucedo et al. / Journal of Hazardous Materials 192 (2011) 1572–1579'
'Mn2O3'	158	NaN	'10 h'	'Activity inhibition'	'IC50'	170	0.00107595	'Saccharomyces cerevisae'	'Eukaryotes & Microalgae'	-2.96821	'Otero-González et al. / Chemosphere 93 (2013) 1201–1206'
'ZrO2'	123	NaN	'10 h'	'Activity inhibition'	'IC50'	1000	0.00813008	'Saccharomyces cerevisae'	'Eukaryotes & Microalgae'	-2.08991	'Otero-González et al. / Chemosphere 93 (2013) 1201–1206'
Eukaryotes - Fold 5
NP	Molar weight (g/mol)	Size	Exposure time	Assay	Endpoint	Value (mg/l	Value(mol/L)	Cell type	Cell group	Log(endpoint)	reference
'Al2O3'	102	83.5	'48 h'	'Static acute toxicity'	'LC50'	9269.2	0.0908745	'P. multimicronucleatum'	'Eukaryotes & Microalgae'	-1.04156	'Li et al. 2012, Chem. Res. Toxicol, 25, 1675−1681'
'SiO2'	60	8.2	'48 h'	'Static acute toxicity'	'LC50'	442.6	0.00737667	'P. multimicronucleatum'	'Eukaryotes & Microalgae'	-2.13214	'Li et al. 2012, Chem. Res. Toxicol, 25, 1675−1681'
'CuO'	80	30	'8 h'	'Cell Viability CFU assay'	'EC50'	20.7	0.00025875	'Saccharomyces cerevisiae S288C'	'Eukaryotes & Microalgae'	-3.58712	'Kasemets et al. Toxicol. In Vitro 2009; 23 (6) 1116-1122'
'TiO2'	80	NaN	'24 h'	'Cell Viability CFU assay'	'EC50'	20000	0.25	'Saccharomyces cerevisiae S288C'	'Eukaryotes & Microalgae'	-0.60206	'Kasemets et al. Toxicol. In Vitro 2009; 23 (6) 1116-1122'
'Fe3O4'	232	9.7	'24 h'	'Viability assay'	'EC50'	26.03	0.000112198	'Tetrahymena thermophila'	'Eukaryotes & Microalgae'	-3.95001	'Aruoja et al Environ. Sci.: Nano, 2015,2, 630-644'
'SiO2'	60	7.8	'24 h'	'Viability assay'	'EC50'	NaN	NaN	'Tetrahymena thermophila'	'Eukaryotes & Microalgae'	NaN	'Aruoja et al Environ. Sci.: Nano, 2015,2, 630-644'
'TiO2'	80	NaN	'20 h'	'Cytotoxicity assay (WST-8)'	'EC50'	NaN	NaN	'Tetrahymena Thermophila'	'Eukaryotes & Microalgae'	NaN	'Ud Daula et al., Journal of Environmental Science and Health, Part A (2013) 48, 1343–1348'
'TiO2'	80	NaN	'40 h'	'Cytotoxicity assay (WST-8)'	'EC50'	NaN	NaN	'Tetrahymena Thermophila'	'Eukaryotes & Microalgae'	NaN	'Ud Daula et al., Journal of Environmental Science and Health, Part A (2013) 48, 1343–1348'
'SiO2'	60	NaN	'10 h'	'Activity inhibition'	'IC50'	1000	0.0166667	'Saccharomyces cerevisae'	'Eukaryotes & Microalgae'	-1.77815	'García-Saucedo et al. / Journal of Hazardous Materials 192 (2011) 1572–1579'
'Al2O3'	102	50	'10 h'	'FungaLight kit, membrane damage assay'	'EC50'	1000	0.00980392	'Saccharomyces cerevisae'	'Eukaryotes & Microalgae'	-2.0086	'García-Saucedo et al. / Journal of Hazardous Materials 192 (2011) 1572–1579'
'Fe2O3'	160	NaN	'10 h'	'Activity inhibition'	'IC50'	1000	0.00625	'Saccharomyces cerevisae'	'Eukaryotes & Microalgae'	-2.20412	'Otero-González et al. / Chemosphere 93 (2013) 1201–1206'
'Mn2O3'	158	NaN	'10 h'	'Activity inhibition'	'IC50'	280	0.00177215	'Saccharomyces cerevisae'	'Eukaryotes & Microalgae'	-2.7515	'Otero-González et al. / Chemosphere 93 (2013) 1201–1206'
'TiO2'	80	21	'10 h'	'FungaLight kit, membrane damage assay'	'EC50'	1000	0.0125	'Saccharomyces cerevisae'	'Eukaryotes & Microalgae'	-1.90309	'Otero-González et al. / Chemosphere 93 (2013) 1201–1206'

## Sheet: Crustacean
Crustacean- Fold 1
NP	Molar weight (g/mol)	Size	Exposure time	Assay	Endpoint	Value (mg/l	Value(mol/L)	Cell type	Cell group	Log(endpoint)	reference
'Ag'	108	26.6	'48 h'	'static renewal assay'	'LC50'	0.067	6.2037e-07	'Ceriodaphnia dubia (neonates)'	'Crustacean'	-6.20735	'Griffit et al. Environm. Toxicol. Chem. 2008; 27 (9) 1972–1978'
'Al'	27	41.7	'48 h'	'static renewal assay'	'LC50'	3.99	0.000147778	'Ceriodaphnia dubia (neonates)'	'Crustacean'	-3.83039	'Griffit et al. Environm. Toxicol. Chem. 2008; 27 (9) 1972–1978'
'Al2O3'	102	80	'48 h'	'Acute toxicity (immobilization)'	'LC50'	500	0.00490196	'Daphnia magna (neonates)'	'Crustacean'	-2.30963	'Zhu et al., J. Nanopart. Res. 2009; 11 (1) 67–75'
'CuO'	79.545	30	'48 h'	'acute immobilisation assay (Daphtoxkit)'	'EC50'	160	0.00201144	'daphnia magna'	'Crustacean'	-2.69649	'Blinova et al. / Environmental Pollution 158 (2010) 41–4744'
'CuO'	79.545	30	'48 h'	'acute immobilisation assay (Daphtoxkit)'	'EC50'	224	0.00281602	'daphnia magna'	'Crustacean'	-2.55036	'Blinova et al. / Environmental Pollution 158 (2010) 41–4744'
'CuO'	79.545	30	'24 h'	'acute mortality test(Thamnotoxkit)'	'LC50'	92.7	0.00116538	'Thamnocephalus platyurus'	'Crustacean'	-2.93353	'Blinova et al. / Environmental Pollution 158 (2010) 41–4744'
'CuO'	79.545	30	'24 h'	'acute mortality test(Thamnotoxkit)'	'LC50'	129	0.00162172	'Thamnocephalus platyurus'	'Crustacean'	-2.79002	'Blinova et al. / Environmental Pollution 158 (2010) 41–4744'
'TiO2'	80	5	'48 h'	'Immobilization'	'ec50'	NaN	NaN	'Daphnia magna'	'Crustacean'	NaN	'Bondarenko et al. Nanotoxicology, 2016; 10(9): 1229–1242'
'TiO2'	80	NaN	'48 h'	'Acute toxicity (mortality)'	'EC50'	500	0.00625	'Daphnia magna (neonates)'	'Crustacean'	-2.20412	'Zhu et al., J. Nanopart. Res. 2009; 11 (1) 67–75'
'ZnO'	81	70	'48 h'	'acute immobilisation assay (Daphtoxkit)'	'EC50'	3.3	4.07407e-05	'daphnia magna'	'Crustacean'	-4.38997	'Blinova et al. / Environmental Pollution 158 (2010) 41–4744'
'ZnO'	81	70	'48 h'	'acute immobilisation assay (Daphtoxkit)'	'EC50'	2.8	3.45679e-05	'daphnia magna'	'Crustacean'	-4.46133	'Blinova et al. / Environmental Pollution 158 (2010) 41–4744'
'ZnO'	81	70	'24 h'	'acute mortality test(Thamnotoxkit)'	'LC50'	5.3	6.54321e-05	'Thamnocephalus platyurus'	'Crustacean'	-4.18421	'Blinova et al. / Environmental Pollution 158 (2010) 41–4744'
	Crustacean - Fold 2
NP	Molar weight (g/mol)	Size	Exposure time	Assay	Endpoint	Value (mg/l	Value(mol/L)	Cell type	Cell group	Log(endpoint)	reference
'Ag'	108	20.4	'48 h'	'Immobilization'	'ec50'	0.003	2.77778e-08	'Daphnia magna'	'Crustacean'	-7.5563	'Bondarenko et al. Nanotoxicology, 2016; 10(9): 1229–1242'
'Ag'	108	10	'48 h'	'Mortality test assay'	'LC50'	0.004	3.7037e-08	'Daphnia magna'	'Crustacean'	-7.43136	'Hoheisel et al. 2012, Environ. Toxicol. Chem. 31: 2557–2563'
'Ag'	108	30	'48 h'	'Mortality test assay'	'LC50'	0.018	1.66667e-07	'Daphnia magna'	'Crustacean'	-6.77815	'Hoheisel et al. 2012, Environ. Toxicol. Chem. 31: 2557–2563'
'CuO'	79.545	24.5	'48 h'	'Immobilization'	'ec50'	0.9	1.13144e-05	'Daphnia magna'	'Crustacean'	-4.94637	'Bondarenko et al. Nanotoxicology, 2016; 10(9): 1229–1242'
'CuO'	79.545	30	'24 h'	'acute mortality test(Thamnotoxkit)'	'LC50'	217	0.00272802	'Thamnocephalus platyurus'	'Crustacean'	-2.56415	'Blinova et al. / Environmental Pollution 158 (2010) 41–4744'
'La2O3'	326	59	'48 h'	'Acute immobilization'	'ec50'	500	0.00153374	'Daphnia magna'	'Crustacean'	-2.81425	'Balusamy et al. Environ. Sci.: Processes Impacts, 2015,17, 1265-1270'
'Ni'	59	6.1	'48 h'	'static renewal assay'	'LC50'	0.674	1.14237e-05	'Ceriodaphnia dubia (neonates)'	'Crustacean'	-4.94219	'Griffit et al. Environm. Toxicol. Chem. 2008; 27 (9) 1972–1978'
'SiO2'	60	212	'48 h'	'Immobilization'	'ec50'	NaN	NaN	'Daphnia magna'	'Crustacean'	NaN	'Bondarenko et al. Nanotoxicology, 2016; 10(9): 1229–1242'
'TiO2'	80	NaN	'48 h'	'Acute toxicity (immobilization)'	'LC50'	500	0.00625	'Daphnia magna (neonates)'	'Crustacean'	-2.20412	'Zhu et al., J. Nanopart. Res. 2009; 11 (1) 67–75'
'TiO2'	80	21	'48 h'	'Acute toxicity (mortality)'	'EC50'	NaN	NaN	'Daphnia magna (neonates)'	'Crustacean'	NaN	'Zhu et al. Chemosphere 2010; 78 (3) 209-216'
'TiO2'	80	NaN	'24 h'	'Mortality test assay'	'LC50'	20000	0.25	'Thamnocephalus platyurus'	'Crustacean'	-0.60206	'Heinlaan et al. Chemosphere 2008; 71 (7) 1308-1316'
'ZnO'	81	70	'48 h'	'acute immobilisation assay (Daphtoxkit)'	'EC50'	3.4	4.19753e-05	'daphnia magna'	'Crustacean'	-4.37701	'Blinova et al. / Environmental Pollution 158 (2010) 41–4744'
'ZnO'	81	20	'48 h'	'Acute toxicity (immobilization)'	'LC50'	1.50343	1.85608e-05	'Daphnia magna (neonates)'	'Crustacean'	-4.7314	'Zhu et al., J. Nanopart. Res. 2009; 11 (1) 67–75'
	Crustacean - Fold 3
NP	Molar weight (g/mol)	Size	Exposure time	Assay	Endpoint	Value (mg/l	Value(mol/L)	Cell type	Cell group	Log(endpoint)	reference
'Ag'	108	20	'48 h'	'Mortality test assay'	'LC50'	0.014	1.2963e-07	'Daphnia magna'	'Crustacean'	-6.8873	'Hoheisel et al. 2012, Environ. Toxicol. Chem. 31: 2557–2563'
'Ag'	108	30	'48 h'	'Mortality test assay'	'LC50'	0.018	1.66667e-07	'Daphnia magna'	'Crustacean'	-6.77815	'Hoheisel et al. 2012, Environ. Toxicol. Chem. 31: 2557–2563'
'Ag'	108	50	'48 h'	'Mortality test assay'	'LC50'	0.024	2.22222e-07	'Daphnia magna'	'Crustacean'	-6.65321	'Hoheisel et al. 2012, Environ. Toxicol. Chem. 31: 2557–2563'
'Co'	59	10.5	'48 h'	'static renewal assay'	'LC50'	1.67	2.83051e-05	'Ceriodaphnia dubia (neonates)'	'Crustacean'	-4.54814	'Griffit et al. Environm. Toxicol. Chem. 2008; 27 (9) 1972–1978'
'Cu'	64	26.7	'48 h'	'static renewal assay'	'LC50'	0.06	9.375e-07	'Daphnia pulex (adults)'	'Crustacean'	-6.02803	'Griffit et al. Environm. Toxicol. Chem. 2008; 27 (9) 1972–1978'
'CuO'	79.545	30	'24 h'	'acute mortality test(Thamnotoxkit)'	'LC50'	112	0.00140801	'Thamnocephalus platyurus'	'Crustacean'	-2.85139	'Blinova et al. / Environmental Pollution 158 (2010) 41–4744'
'CuO'	79.545	30	'24 h'	'acute mortality test(Thamnotoxkit)'	'LC50'	90.3	0.00113521	'Thamnocephalus platyurus'	'Crustacean'	-2.94493	'Blinova et al. / Environmental Pollution 158 (2010) 41–4744'
'MgO'	40	NaN	'48 h'	'Immobilization'	'EC50'	25.46	0.0006365	'Daphnia magna'	'Crustacean'	-3.1962	'Sovova et al., 2009, Proceedings,NANOCON Conference, Roznov , Czech Republic, pp 62‐71,'
'TiO2'	80	NaN	'48 h'	'Mortality test assay'	'LC50'	20000	0.25	'Daphnia magna (neonates)'	'Crustacean'	-0.60206	'Heinlaan et al. Chemosphere 2008; 71 (7) 1308-1316'
'ZnO'	81	70	'48 h'	'acute immobilisation assay (Daphtoxkit)'	'EC50'	1.7	2.09877e-05	'daphnia magna'	'Crustacean'	-4.67804	'Blinova et al. / Environmental Pollution 158 (2010) 41–4744'
'ZnO'	81	20	'48 h'	'Acute toxicity (mortality)'	'EC50'	0.618883	7.64053e-06	'Daphnia magna (neonates)'	'Crustacean'	-5.11688	'Zhu et al., J. Nanopart. Res. 2009; 11 (1) 67–75'
'ZnO'	81	70	'24 h'	'acute mortality test(Thamnotoxkit)'	'LC50'	1.1	1.35802e-05	'Thamnocephalus platyurus'	'Crustacean'	-4.86709	'Blinova et al. / Environmental Pollution 158 (2010) 41–4744'
'ZnO'	81	70	'24 h'	'acute mortality test(Thamnotoxkit)'	'LC50'	1.4	1.7284e-05	'Thamnocephalus platyurus'	'Crustacean'	-4.76236	'Blinova et al. / Environmental Pollution 158 (2010) 41–4744'
Crustacean - Fold 4
NP	Molar weight (g/mol)	Size	Exposure time	Assay	Endpoint	Value (mg/l	Value(mol/L)	Cell type	Cell group	Log(endpoint)	reference
'Ag'	108	10	'48 h'	'Mortality test assay'	'LC50'	0.01	9.25926e-08	'Daphnia magna'	'Crustacean'	-7.03342	'Hoheisel et al. 2012, Environ. Toxicol. Chem. 31: 2557–2563'
'Ag'	108	20	'48 h'	'Mortality test assay'	'LC50'	0.008	7.40741e-08	'Daphnia magna'	'Crustacean'	-7.13033	'Hoheisel et al. 2012, Environ. Toxicol. Chem. 31: 2557–2563'
'Ag'	108	50	'48 h'	'Mortality test assay'	'LC50'	0.03	2.77778e-07	'Daphnia magna'	'Crustacean'	-6.5563	'Hoheisel et al. 2012, Environ. Toxicol. Chem. 31: 2557–2563'
'Al2O3'	102	80	'48 h'	'Acute toxicity (mortality)'	'EC50'	500	0.00490196	'Daphnia magna (neonates)'	'Crustacean'	-2.30963	'Zhu et al., J. Nanopart. Res. 2009; 11 (1) 67–75'
'CuO'	79.545	30	'48 h'	'acute immobilisation assay (Daphtoxkit)'	'EC50'	200	0.0025143	'daphnia magna'	'Crustacean'	-2.59958	'Blinova et al. / Environmental Pollution 158 (2010) 41–4744'
'CuO'	79.545	NaN	'48 h'	'Immobilization'	'EC50'	5.903	7.42096e-05	'Daphnia magna'	'Crustacean'	-4.12954	'Sovova et al., 2009, Proceedings,NANOCON Conference, Roznov , Czech Republic, pp 62‐71,'
'CuO'	80	30	'48 h'	'Mortality test assay'	'LC50'	3.2	4e-05	'Daphnia magna (neonates)'	'Crustacean'	-4.39794	'Heinlaan et al. Chemosphere 2008; 71 (7) 1308-1316'
'CuO'	79.545	30	'24 h'	'acute mortality test(Thamnotoxkit)'	'LC50'	152	0.00191087	'Thamnocephalus platyurus'	'Crustacean'	-2.71877	'Blinova et al. / Environmental Pollution 158 (2010) 41–4744'
'CuO'	80	30	'24 h'	'Mortality test assay'	'LC50'	2.1	2.625e-05	'Thamnocephalus platyurus'	'Crustacean'	-4.58087	'Heinlaan et al. Chemosphere 2008; 71 (7) 1308-1316'
'TiO2'	80	21	'72 h'	'Acute toxicity (mortality)'	'EC50'	1.62	2.025e-05	'Daphnia magna (neonates)'	'Crustacean'	-4.69357	'Zhu et al. Chemosphere 2010; 78 (3) 209-216'
'ZnO'	81	70	'48 h'	'acute immobilisation assay (Daphtoxkit)'	'EC50'	3.5	4.32099e-05	'daphnia magna'	'Crustacean'	-4.36442	'Blinova et al. / Environmental Pollution 158 (2010) 41–4744'
'ZnO'	81	70	'24 h'	'acute mortality test(Thamnotoxkit)'	'LC50'	6	7.40741e-05	'Thamnocephalus platyurus'	'Crustacean'	-4.13033	'Blinova et al. / Environmental Pollution 158 (2010) 41–4744'
'ZnO'	81	70	'24 h'	'acute mortality test(Thamnotoxkit)'	'LC50'	1.5	1.85185e-05	'Thamnocephalus platyurus'	'Crustacean'	-4.73239	'Blinova et al. / Environmental Pollution 158 (2010) 41–4744'
Crustacean - Fold 5
NP	Molar weight (g/mol)	Size	Exposure time	Assay	Endpoint	Value (mg/l	Value(mol/L)	Cell type	Cell group	Log(endpoint)	reference
'Ag'	108	26.6	'48 h'	'static renewal assay'	'LC50'	0.04	3.7037e-07	'Daphnia pulex (adults)'	'Crustacean'	-6.43136	'Griffit et al. Environm. Toxicol. Chem. 2008; 27 (9) 1972–1978'
'Cu'	64	26.7	'48 h'	'static renewal assay'	'LC50'	0.419	6.54687e-06	'Ceriodaphnia dubia (neonates)'	'Crustacean'	-5.18397	'Griffit et al. Environm. Toxicol. Chem. 2008; 27 (9) 1972–1978'
'CuO'	79.545	30	'48 h'	'acute immobilisation assay (Daphtoxkit)'	'EC50'	92.7	0.00116538	'daphnia magna'	'Crustacean'	-2.93353	'Blinova et al. / Environmental Pollution 158 (2010) 41–4744'
'CuO'	79.545	30	'48 h'	'acute immobilisation assay (Daphtoxkit)'	'EC50'	149	0.00187315	'daphnia magna'	'Crustacean'	-2.72743	'Blinova et al. / Environmental Pollution 158 (2010) 41–4744'
'Ni'	59	6.1	'48 h'	'static renewal assay'	'LC50'	3.89	6.59322e-05	'Daphnia pulex (adults)'	'Crustacean'	-4.1809	'Griffit et al. Environm. Toxicol. Chem. 2008; 27 (9) 1972–1978'
'TiO2'	80	NaN	'48 h'	'Immobilization'	'EC50'	300	0.00375	'Daphnia magna'	'Crustacean'	-2.42597	'Sovova et al., 2009, Proceedings,NANOCON Conference, Roznov , Czech Republic, pp 62‐71,'
'TiO2'	80	21	'72 h'	'Acute toxicity (immobilization)'	'LC50'	2.02	2.525e-05	'Daphnia magna (neonates)'	'Crustacean'	-4.59774	'Zhu et al. Chemosphere 2010; 78 (3) 209-216'
'ZnO'	81	70	'48 h'	'acute immobilisation assay (Daphtoxkit)'	'EC50'	9	0.000111111	'daphnia magna'	'Crustacean'	-3.95424	'Blinova et al. / Environmental Pollution 158 (2010) 41–4744'
'ZnO'	81	13.6	'48 h'	'Immobilization'	'ec50'	1.87	2.30864e-05	'Daphnia magna'	'Crustacean'	-4.63664	'Bondarenko et al. Nanotoxicology, 2016; 10(9): 1229–1242'
'ZnO'	81	NaN	'48 h'	'Immobilization'	'EC50'	2.6	3.20988e-05	'Daphnia magna'	'Crustacean'	-4.49351	'Sovova et al., 2009, Proceedings,NANOCON Conference, Roznov , Czech Republic, pp 62‐71,'
'ZnO'	81	NaN	'48 h'	'Mortality test assay'	'LC50'	3.2	3.95062e-05	'Daphnia magna (neonates)'	'Crustacean'	-4.40334	'Heinlaan et al. Chemosphere 2008; 71 (7) 1308-1316'
'ZnO'	81	70	'24 h'	'acute mortality test(Thamnotoxkit)'	'LC50'	3.6	4.44444e-05	'Thamnocephalus platyurus'	'Crustacean'	-4.35218	'Blinova et al. / Environmental Pollution 158 (2010) 41–4744'
'ZnO'	81	NaN	'24 h'	'Mortality test assay'	'LC50'	0.18	2.22222e-06	'Thamnocephalus platyurus'	'Crustacean'	-5.65321	'Heinlaan et al. Chemosphere 2008; 71 (7) 1308-1316'

## Sheet: Plants
Plants- Fold 1
NP	Molar weight (g/mol)	Size	Exposure time	Assay	Endpoint	Value (mg/l	Value(mol/L)	Cell type	Cell group	Log(endpoint)	reference
'Al'	27	'18'	'2 h'	'growth inhibition assay'	'IC50'	2000	0.0740741	'Raphanus sativus'	'Plants'	-1.13033	'Lin et al. Environm. Pollut. 2007 150 (2) 243-250'
'CuO'	79.545	'30-50'	'3 days'	'Phytotoxicity (root length)'	'EC50'	12.9	0.000162172	'Lactuca sativa'	'Plants'	-3.79002	'Wu et al. J Pet Environ Biotechnol, 2012, 3:126'
'CuO'	79.545	'30-50'	'3 days'	'Seed germination'	'EC50'	0.46	5.78289e-06	'Lactuca sativa L.'	'Plants'	-5.23786	'Ko et al. Appl Microbiol Biotechnol (2014) 98:3295–3303'
'CuO'	79.545	'30-50'	'3 days'	'Phytotoxicity (root length)'	'EC50'	297	0.00373374	'Raphanus sativus'	'Plants'	-2.42786	'Wu et al. J Pet Environ Biotechnol, 2012, 3:126'
'Gd2O3'	362	'23.4'	'2 h'	'growth inhibition assay'	'IC50'	20	5.52486e-05	'Brassica napus'	'Plant'	-4.25768	'Ma et al. Chemosphere 2010; 78 (3) 273-279'
'La2O3'	326	'22'	'5 days'	'growth inhibition assay'	'IC50'	149	0.000457055	'Cucumis sativus'	'Plant'	-3.34003	'Ma et al. Nanotoxicology 2011; 5(4) 743-753'
'NiO'	75	'30'	'3 days'	'Phytotoxicity (root length)'	'EC50'	228	0.00304	'Cucumis sativus'	'Plant'	-2.51713	'Wu et al. J Pet Environ Biotechnol, 2012, 3:126'
'TiO2'	80	'30-50'	'3 days'	'Phytotoxicity (root length)'	'EC50'	5000	0.0625	'Lactuca sativa'	'Plants'	-1.20412	'Wu et al. J Pet Environ Biotechnol, 2012, 3:126'
'TiO2'	80	'30-50'	'3 days'	'Phytotoxicity (root length)'	'EC50'	5000	0.0625	'Raphanus sativus'	'Plants'	-1.20412	'Wu et al. J Pet Environ Biotechnol, 2012, 3:126'
'TiO2'	80	'<25'	'3 days'	'Seed germination'	'EC50'	1000	0.0125	'Raphanus sativus L'	'Plants'	-1.90309	'Ko et al. Appl Microbiol Biotechnol (2014) 98:3295–3303'
'ZnO'	81	'20'	'2 h'	'growth inhibition assay'	'IC50'	20	0.000246914	'Brassica napus'	'Plant'	-3.60746	'Lin et al. Environm. Pollut. 2007 150 (2) 243-250'
'Yb2O3'	394	'12'	'5 days'	'Root elongation'	'EC50'	182	0.000461929	'Cucumis sativus'	'Plants'	-3.33542	'Zhang et al., Environ. Sci. Technol. 2012, 46, 3, 1834–1841'
	Plants - Fold 2
NP	Molar weight (g/mol)	Size	Exposure time	Assay	Endpoint	Value (mg/l	Value(mol/L)	Cell type	Cell group	Log(endpoint)	reference
'Ag2O'	232	'-'	'6 days'	'Growth inhibition assay'	'EC50'	144	0.00062069	'Vignia radiata'	'Plants'	-3.20713	'Singh et al. Bull Environ Contam Toxicol (2015) 95:379–384'
'Al2O3'	102	'60'	'2 h'	'growth inhibition assay'	'IC50'	2000	0.0196078	'Raphanus sativus'	'Plants'	-1.70757	'Lin et al. Environm. Pollut. 2007 150 (2) 243-250'
'CeO2'	172	'7.2'	'2 h'	'growth inhibition assay'	'IC50'	1000	0.00581395	'Brassica napus'	'Plant'	-2.23553	'Ma et al. Chemosphere 2010; 78 (3) 273-279'
'CuO'	80	'30-50'	'4 days'	'growth inhibition assay'	'EC50'	1.28	1.6e-05	'Lactuca sativa L.'	'Plants'	-4.79588	'Kong et al. Nanomaterials 2021, 11, 1653'
'Fe2O3'	160	'20-40'	'3 days'	'Phytotoxicity (root length)'	'EC50'	5000	0.03125	'Raphanus sativus'	'Plants'	-1.50515	'Wu et al. J Pet Environ Biotechnol, 2012, 3:126'
'TiO2'	80	'30-50'	'3 days'	'Phytotoxicity (root length)'	'EC50'	5000	0.0625	'Cucumis sativus'	'Plant'	-1.20412	'Wu et al. J Pet Environ Biotechnol, 2012, 3:126'
'TiO2'	80	'<25'	'3 days'	'Seed germination'	'EC50'	1000	0.0125	'Lactuca sativa L.'	'Plants'	-1.90309	'Ko et al. Appl Microbiol Biotechnol (2014) 98:3295–3303'
'TiO2'	80	'<25'	'4 days'	'growth inhibition assay'	'EC50'	1000	0.0125	'Lactuca sativa L.'	'Plants'	-1.90309	'Kong et al. Nanomaterials 2021, 11, 1653'
'TiO2'	80	'<25'	'4 days'	'growth inhibition assay'	'EC50'	1000	0.0125	'Raphanus sativus'	'Plants'	-1.90309	'Kong et al. Nanomaterials 2021, 11, 1653'
'Zn'	65	'35'	'2 h'	'growth inhibition assay'	'IC50'	20	0.000307692	'Lolium perenne'	'Plants'	-3.51188	'Lin et al. Environm. Pollut. 2007 150 (2) 243-250'
'ZnO'	81	'40-100'	'4 days'	'growth inhibition assay'	'EC50'	0.5	6.17284e-06	'Lactuca sativa L.'	'Plants'	-5.20952	'Kong et al. Nanomaterials 2021, 11, 1653'
'ZnO'	81	'20'	'2 h'	'growth inhibition assay'	'IC50'	20	0.000246914	'Lolium perenne'	'Plants'	-3.60746	'Lin et al. Environm. Pollut. 2007 150 (2) 243-250'
'ZnO'	81	'40-100'	'4 days'	'growth inhibition assay'	'EC50'	1.23	1.51852e-05	'Raphanus sativus'	'Plants'	-4.81858	'Kong et al. Nanomaterials 2021, 11, 1653'
	Plants - Fold 3
NP	Molar weight (g/mol)	Size	Exposure time	Assay	Endpoint	Value (mg/l	Value(mol/L)	Cell type	Cell group	Log(endpoint)	reference
'Al'	27	'18'	'2 h'	'growth inhibition assay'	'IC50'	2000	0.0740741	'Brassica napus'	'Plant'	-1.13033	'Lin et al. Environm. Pollut. 2007 150 (2) 243-250'
'Al2O3'	102	'60'	'2 h'	'growth inhibition assay'	'IC50'	2000	0.0196078	'Brassica napus'	'Plant'	-1.70757	'Lin et al. Environm. Pollut. 2007 150 (2) 243-250'
'Al2O3'	102	'40-50'	'4 days'	'growth inhibition assay'	'EC50'	1000	0.00980392	'Lactuca sativa L.'	'Plants'	-2.0086	'Kong et al. Nanomaterials 2021, 11, 1653'
'CuO'	79.545	'30-50'	'3 days'	'Phytotoxicity (root length)'	'EC50'	175.4	0.00220504	'Cucumis sativus'	'Plant'	-2.65658	'Wu et al. J Pet Environ Biotechnol, 2012, 3:126'
'Fe2O3'	160	'20-40'	'3 days'	'Phytotoxicity (root length)'	'EC50'	5000	0.03125	'Lactuca sativa'	'Plants'	-1.50515	'Wu et al. J Pet Environ Biotechnol, 2012, 3:126'
'Fe2O3'	160	'20-40'	'3 days'	'Seed germination'	'EC50'	1000	0.00625	'Raphanus sativus L'	'Plants'	-2.20412	'Ko et al. Appl Microbiol Biotechnol (2014) 98:3295–3303'
'La2O3'	326	'21.8'	'2 h'	'growth inhibition assay'	'IC51'	40	0.000122699	'Brassica napus'	'Plant'	-3.91116	'Ma et al. Chemosphere 2010; 78 (3) 273-279'
'NiO'	75	'8--20'	'4 days'	'growth inhibition assay'	'EC50'	5.57	7.42667e-05	'Lactuca sativa L.'	'Plants'	-4.12921	'Kong et al. Nanomaterials 2021, 11, 1653'
'NiO'	75	'30'	'3 days'	'Seed germination'	'EC50'	114.21	0.0015228	'Raphanus sativus L'	'Plants'	-2.81736	'Ko et al. Appl Microbiol Biotechnol (2014) 98:3295–3303'
'Zn'	65	'35'	'2 h'	'growth inhibition assay'	'IC50'	50	0.000769231	'Raphanus sativus'	'Plants'	-3.11394	'Lin et al. Environm. Pollut. 2007 150 (2) 243-250'
'ZnO'	81	'-'	'3 days'	'Seed germination'	'EC50'	10.84	0.000133827	'Lactuca sativa L.'	'Plants'	-3.87346	'Ko et al. Appl Microbiol Biotechnol (2014) 98:3295–3303'
'ZnO'	81	'40-100'	'4 days'	'growth inhibition assay'	'EC50'	1.31	1.61728e-05	'Lactuca sativa L.'	'Plants'	-4.79121	'Kong et al. Nanomaterials 2021, 11, 1653'
'ZnO'	81	'-'	'3 days'	'Seed germination'	'EC50'	46.54	0.000574568	'Raphanus sativus L'	'Plants'	-3.24066	'Ko et al. Appl Microbiol Biotechnol (2014) 98:3295–3303'
Plants - Fold 4
NP	Molar weight (g/mol)	Size	Exposure time	Assay	Endpoint	Value (mg/l	Value(mol/L)	Cell type	Cell group	Log(endpoint)	reference
'Al'	27	'18'	'2 h'	'growth inhibition assay'	'IC50'	2000	0.0740741	'Lolium perenne'	'Plants'	-1.13033	'Lin et al. Environm. Pollut. 2007 150 (2) 243-250'
'Al2O3'	102	'60'	'2 h'	'growth inhibition assay'	'IC50'	2000	0.0196078	'Lolium perenne'	'Plants'	-1.70757	'Lin et al. Environm. Pollut. 2007 150 (2) 243-250'
'CeO2'	172	'7.2'	'2 h'	'growth inhibition assay'	'IC50'	1000	0.00581395	'Cucumis sativus'	'Plant'	-2.23553	'Ma et al. Chemosphere 2010; 78 (3) 273-279'
'CeO2'	172	'7.2'	'2 h'	'growth inhibition assay'	'IC50'	1000	0.00581395	'Raphanus sativus'	'Plants'	-2.23553	'Ma et al. Chemosphere 2010; 78 (3) 273-279'
'Co3O4'	241	'10--30'	'3 days'	'Phytotoxicity (root length)'	'EC50'	5000	0.0207469	'Cucumis sativus'	'Plant'	-1.68305	'Wu et al. J Pet Environ Biotechnol, 2012, 3:126'
'Co3O4'	241	'10--30'	'3 days'	'Phytotoxicity (root length)'	'EC50'	5000	0.0207469	'Raphanus sativus'	'Plants'	-1.68305	'Wu et al. J Pet Environ Biotechnol, 2012, 3:126'
'CuO'	80	'30-50'	'4 days'	'growth inhibition assay'	'EC50'	0.25	3.125e-06	'Lactuca sativa L.'	'Plants'	-5.50515	'Kong et al. Nanomaterials 2021, 11, 1653'
'CuO'	79.545	'30-50'	'3 days'	'Seed germination'	'EC50'	26.84	0.000337419	'Raphanus sativus L'	'Plants'	-3.47183	'Ko et al. Appl Microbiol Biotechnol (2014) 98:3295–3303'
'Fe2O3'	160	'20-40'	'3 days'	'Seed germination'	'EC50'	1000	0.00625	'Lactuca sativa L.'	'Plants'	-2.20412	'Ko et al. Appl Microbiol Biotechnol (2014) 98:3295–3303'
'NiO'	75	'30'	'3 days'	'Phytotoxicity (root length)'	'EC50'	27.9	0.000372	'Lactuca sativa'	'Plants'	-3.42946	'Wu et al. J Pet Environ Biotechnol, 2012, 3:126'
'Yb2O3'	394	'11.7'	'2 h'	'growth inhibition assay'	'IC50'	70	0.000177665	'Brassica napus'	'Plant'	-3.7504	'Ma et al. Chemosphere 2010; 78 (3) 273-279'
'Zn'	65	'35'	'2 h'	'growth inhibition assay'	'IC50'	20	0.000307692	'Brassica napus'	'Plant'	-3.51188	'Lin et al. Environm. Pollut. 2007 150 (2) 243-250'
'ZnO'	81	'20'	'2 h'	'growth inhibition assay'	'IC50'	50	0.000617284	'Raphanus sativus'	'Plants'	-3.20952	'Lin et al. Environm. Pollut. 2007 150 (2) 243-250'
Plants - Fold 5
NP	Molar weight (g/mol)	Size	Exposure time	Assay	Endpoint	Value (mg/l	Value(mol/L)	Cell type	Cell group	Log(endpoint)	reference
'Ag2O'	232	'-'	'6 days'	'Growth inhibition assay'	'EC50'	109.98	0.000474052	'Vignia radiata'	'Plants'	-3.32417	'Singh et al. Bull Environ Contam Toxicol (2015) 95:379–384'
'Ag2O'	232	'-'	'6 days'	'Growth inhibition assay'	'EC50'	122	0.000525862	'Vignia radiata'	'Plants'	-3.27913	'Singh et al. Bull Environ Contam Toxicol (2015) 95:379–384'
'Al2O3'	102	'40-50'	'4 days'	'growth inhibition assay'	'EC50'	1000	0.00980392	'Lactuca sativa L.'	'Plants'	-2.0086	'Kong et al. Nanomaterials 2021, 11, 1653'
'Al2O3'	102	'40-50'	'4 days'	'growth inhibition assay'	'EC50'	1000	0.00980392	'Raphanus sativus'	'Plants'	-2.0086	'Kong et al. Nanomaterials 2021, 11, 1653'
'Co3O4'	241	'10--30'	'3 days'	'Phytotoxicity (root length)'	'EC50'	5000	0.0207469	'Lactuca sativa'	'Plants'	-1.68305	'Wu et al. J Pet Environ Biotechnol, 2012, 3:126'
'CuO'	80	'30-50'	'4 days'	'growth inhibition assay'	'EC50'	0.35	4.375e-06	'Raphanus sativus'	'Plants'	-5.35902	'Kong et al. Nanomaterials 2021, 11, 1653'
'Fe2O3'	160	'20-40'	'3 days'	'Phytotoxicity (root length)'	'EC50'	1682	0.0105125	'Cucumis sativus'	'Plant'	-1.97829	'Wu et al. J Pet Environ Biotechnol, 2012, 3:126'
'NiO'	75	'30'	'3 days'	'Seed germination'	'EC50'	17.17	0.000228933	'Lactuca sativa L.'	'Plants'	-3.64029	'Ko et al. Appl Microbiol Biotechnol (2014) 98:3295–3303'
'NiO'	75	'8--20'	'4 days'	'growth inhibition assay'	'EC50'	0.57	7.6e-06	'Lactuca sativa L.'	'Plants'	-5.11919	'Kong et al. Nanomaterials 2021, 11, 1653'
'NiO'	75	'8--20'	'4 days'	'growth inhibition assay'	'EC50'	2.85	3.8e-05	'Raphanus sativus'	'Plants'	-4.42022	'Kong et al. Nanomaterials 2021, 11, 1653'
'NiO'	75	'30'	'3 days'	'Phytotoxicity (root length)'	'EC50'	400	0.00533333	'Raphanus sativus'	'Plants'	-2.273	'Wu et al. J Pet Environ Biotechnol, 2012, 3:126'
'TiO2'	80	'<25'	'4 days'	'growth inhibition assay'	'EC50'	1000	0.0125	'Lactuca sativa L.'	'Plants'	-1.90309	'Kong et al. Nanomaterials 2021, 11, 1653'

## Sheet: Mammalian
Mammalian cells- Fold 1
NP	Molar weight (g/mol)	Size	Exposure time	Assay	Endpoint	Value (mg/l	Value(mol/L)	Cell type	Cell group	Log(endpoint)	reference
'Co3O4'	241	9.2	'24 h'	'NRU assay'	'IC50'	135.5	0.000562241	'Balb/c'	'Mammalian cells'	-3.25008	'Ivansk et al. Curr Top Med Chem., 2015;15(18):1914-29'
'Cr2O3'	152	193	'24 h'	'ATP assay'	'EC50'	11.749	7.72959e-05	'RAW 2647 cells, ATP assay'	'Mammalian cells'	-4.11184	'Zhang et al. ACS Nano 2012, 6, 5, 4349–4368'
'Cr2O3'	152	193	'24 h'	'MTS assay'	'EC50'	467.735	0.0030772	'RAW 2647 cells, MTS assay'	'Mammalian cells'	-2.51184	'Zhang et al. ACS Nano 2012, 6, 5, 4349–4368'
'CuO'	79.545	12.8	'24 h'	'MTS assay'	'EC50'	13.1826	0.000165725	'RAW 2647 cells, MTS assay'	'Mammalian cells'	-3.78061	'Zhang et al. ACS Nano 2012, 6, 5, 4349–4368'
'MgO'	40	NaN	'24 h'	'NRU assay'	'IC50'	NaN	NaN	'Balb/c'	'Mammalian cells'	NaN	'Ivansk et al. Curr Top Med Chem., 2015;15(18):1914-29'
'SnO2'	151	62.4	'24 h'	'ATP assay'	'EC50'	100000	0.662252	'RAW 2647 cells, ATP assay'	'Mammalian cells'	-0.178977	'Zhang et al. ACS Nano 2012, 6, 5, 4349–4368'
'TiO2'	80	NaN	'24 h'	'resazurin fluorescence assay'	'ec50'	NaN	NaN	'Balb/c 3T3'	'Mammalian cells'	NaN	'Titma et al. Cytotechnology. 2016;68(6):2363-2377'
'TiO2'	80	NaN	'24 h'	'resazurin fluorescence assay'	'ec50'	NaN	NaN	'Balb/c 3T3'	'Mammalian cells'	NaN	'Titma et al. Cytotechnology. 2016;68(6):2363-2377'
'TiO2'	80	5	'24 h'	'WST-1'	'ec50'	NaN	NaN	'murine Fibroblasts BALB/c 3t3'	'Mammalian cells'	NaN	'Bondarenko et al. Nanotoxicology, 2016; 10(9): 1229–1242'
'ZnO'	81	19.7	'24 h'	'NRU assay'	'IC50'	12.1	0.000149383	'Balb/c'	'Mammalian cells'	-3.8257	'Ivansk et al. Curr Top Med Chem., 2015;15(18):1914-29'
'ZrO2'	123	40.1	'24 h'	'ATP assay'	'EC50'	NaN	NaN	'RAW 2647 cells, ATP assay'	'Mammalian cells'	NaN	'Zhang et al. ACS Nano 2012, 6, 5, 4349–4368'
	Mammalian cells - Fold 2
NP	Molar weight (g/mol)	Size	Exposure time	Assay	Endpoint	Value (mg/l	Value(mol/L)	Cell type	Cell group	Log(endpoint)	reference
'Al2o3'	102	NaN	'12 h'	'MTT assay'	'EC50'	NaN	NaN	'Neuro 2A cells'	'Mammalian cells'	NaN	'Jeng et al. ron Sci Health A Tox Hazard Subst Environ Eng. 2006;41(12):2699-711'
'Co3O4'	241	10	'24 h'	'MTS assay'	'EC50'	389.045	0.0016143	'RAW 2647 cells, MTS assay'	'Mammalian cells'	-2.79202	'Zhang et al. ACS Nano 2012, 6, 5, 4349–4368'
'CoO'	75	71.8	'24 h'	'ATP assay'	'EC50'	47.863	0.000638173	'RAW 2647 cells, ATP assay'	'Mammalian cells'	-3.19506	'Zhang et al. ACS Nano 2012, 6, 5, 4349–4368'
'CoO'	75	71.8	'24 h'	'MTS assay'	'EC50'	63.0957	0.000841276	'RAW 2647 cells, MTS assay'	'Mammalian cells'	-3.07506	'Zhang et al. ACS Nano 2012, 6, 5, 4349–4368'
'CuO'	79.545	11.9	'24 h'	'NRU assay'	'IC50'	17.7	0.000222516	'Balb/c'	'Mammalian cells'	-3.65264	'Ivansk et al. Curr Top Med Chem., 2015;15(18):1914-29'
'CuO'	79.545	12.8	'24 h'	'ATP assay'	'EC50'	14.4544	0.000181713	'RAW 2647 cells, ATP assay'	'Mammalian cells'	-3.74061	'Zhang et al. ACS Nano 2012, 6, 5, 4349–4368'
'NiO'	75	13.1	'24 h'	'MTS assay'	'EC50'	151.356	0.00201808	'RAW 2647 cells, MTS assay'	'Mammalian cells'	-2.69506	'Zhang et al. ACS Nano 2012, 6, 5, 4349–4368'
'Sb2O3'	292	20.8	'24 h'	'NRU assay'	'IC50'	39.1	0.000133904	'Balb/c'	'Mammalian cells'	-3.87321	'Ivansk et al. Curr Top Med Chem., 2015;15(18):1914-29'
'SiO2'	60	212	'24 h'	'WST-1'	'ec50'	NaN	NaN	'murine Fibroblasts BALB/c 3t3'	'Mammalian cells'	NaN	'Bondarenko et al. Nanotoxicology, 2016; 10(9): 1229–1242'
'TiO2'	80	12.6	'24 h'	'MTS assay'	'EC50'	NaN	NaN	'RAW 2647 cells, MTS assay'	'Mammalian cells'	NaN	'Zhang et al. ACS Nano 2012, 6, 5, 4349–4368'
'ZnO'	81	22.6	'24 h'	'MTS assay'	'EC50'	17.378	0.000214543	'RAW 2647 cells, MTS assay'	'Mammalian cells'	-3.66849	'Zhang et al. ACS Nano 2012, 6, 5, 4349–4368'
'NiO'	75	13.1	'24 h'	'ATP assay'	'EC50'	NaN	NaN	'RAW 2647 cells, MTS assay'	'Mammalian cells'	NaN	'Zhang et al. ACS Nano 2012, 6, 5, 4349–4368'
	Mammalian cells - Fold 3
NP	Molar weight (g/mol)	Size	Exposure time	Assay	Endpoint	Value (mg/l	Value(mol/L)	Cell type	Cell group	Log(endpoint)	reference
'Ag'	108	20.4	'-'	'WST-1'	'ec50'	9.8	9.07407e-05	'rat macrophages'	'Mammalian cells'	-4.0422	'Bondarenko et al. Nanotoxicology, 2016; 10(9): 1229–1242'
'CuO'	79.545	24.5	'24 h'	'WST-1'	'ec50'	0.7	8.80005e-06	'murine Fibroblasts BALB/c 3t3'	'Mammalian cells'	-5.05551	'Bondarenko et al. Nanotoxicology, 2016; 10(9): 1229–1242'
'Mn3O4'	229	14.9	'24 h'	'NRU assay'	'IC50'	195	0.000851528	'Balb/c'	'Mammalian cells'	-3.0698	'Ivansk et al. Curr Top Med Chem., 2015;15(18):1914-29'
'Mn3o4'	229	NaN	'24 h'	'resazurin fluorescence assay'	'ec50'	49.9	0.000217904	'Balb/c 3T3'	'Mammalian cells'	-3.66173	'Titma et al. Cytotechnology. 2016;68(6):2363-2377'
'SiO2'	60	12	'24 h'	'NRU assay'	'IC50'	NaN	NaN	'Balb/c'	'Mammalian cells'	NaN	'Ivansk et al. Curr Top Med Chem., 2015;15(18):1914-29'
'SiO2'	60	212	'48 h'	'Membrane integrity'	'ec50'	NaN	NaN	'murine Fibroblasts (membrane integrity)'	'Mammalian cells'	NaN	'Bondarenko et al. Nanotoxicology, 2016; 10(9): 1229–1242'
'SiO2'	60	212	'-'	'WST-1'	'ec50'	NaN	NaN	'rat macrophages'	'Mammalian cells'	NaN	'Bondarenko et al. Nanotoxicology, 2016; 10(9): 1229–1242'
'TiO2'	80	5	'48 h'	'Membrane integrity'	'ec50'	NaN	NaN	'murine Fibroblasts (membrane integrity)'	'Mammalian cells'	NaN	'Bondarenko et al. Nanotoxicology, 2016; 10(9): 1229–1242'
'TiO2'	80	NaN	'12 h'	'MTT assay'	'EC50'	NaN	NaN	'Neuro 2A cells'	'Mammalian cells'	NaN	'Jeng et al. ron Sci Health A Tox Hazard Subst Environ Eng. 2006;41(12):2699-711'
'ZnO'	81	NaN	'24 h'	'resazurin fluorescence assay'	'ec50'	11.2	0.000138272	'Balb/c 3T3'	'Mammalian cells'	-3.85927	'Titma et al. Cytotechnology. 2016;68(6):2363-2377'
'ZnO'	81	13.6	'24 h'	'WST-1'	'ec50'	9.1	0.000112346	'murine Fibroblasts BALB/c 3t3'	'Mammalian cells'	-3.94944	'Bondarenko et al. Nanotoxicology, 2016; 10(9): 1229–1242'
'ZnO'	81	22.6	'24 h'	'ATP assay'	'EC50'	8.12831	0.000100349	'RAW 2647 cells, ATP assay'	'Mammalian cells'	-3.99849	'Zhang et al. ACS Nano 2012, 6, 5, 4349–4368'
Mammalian cells - Fold 4
NP	Molar weight (g/mol)	Size	Exposure time	Assay	Endpoint	Value (mg/l	Value(mol/L)	Cell type	Cell group	Log(endpoint)	reference
'Al2O3'	102	14.7	'24 h'	'ATP assay'	'EC50'	NaN	NaN	'RAW 2647 cells, ATP assay'	'Mammalian cells'	NaN	'Zhang et al. ACS Nano 2012, 6, 5, 4349–4368'
'Al2O3'	102	14.7	'24 h'	'MTS assay'	'EC50'	NaN	NaN	'RAW 2647 cells, MTS assay'	'Mammalian cells'	NaN	'Zhang et al. ACS Nano 2012, 6, 5, 4349–4368'
'Cr2o3'	152	NaN	'12 h'	'MTT assay'	'EC50'	50	0.00131579	'Neuro 2A cells'	'Mammalian cells'	-2.88081	'Jeng et al. ron Sci Health A Tox Hazard Subst Environ Eng. 2006;41(12):2699-711'
'CuO'	79.545	24.5	'48 h'	'Membrane integrity'	'ec50'	1	1.25715e-05	'murine Fibroblasts (membrane integrity)'	'Mammalian cells'	-4.90061	'Bondarenko et al. Nanotoxicology, 2016; 10(9): 1229–1242'
'Mn2O3'	158	51.5	'24 h'	'ATP assay'	'EC50'	12.5893	7.96788e-05	'RAW 2647 cells, ATP assay'	'Mammalian cells'	-4.09866	'Zhang et al. ACS Nano 2012, 6, 5, 4349–4368'
'Mn2O3'	158	51.5	'24 h'	'MTS assay'	'EC50'	10.2329	6.47654e-05	'RAW 2647 cells, MTS assay'	'Mammalian cells'	-4.18866	'Zhang et al. ACS Nano 2012, 6, 5, 4349–4368'
'Ni2O3'	165	140.6	'24 h'	'MTS assay'	'EC50'	316.228	0.00191653	'RAW 2647 cells, MTS assay'	'Mammalian cells'	-2.71748	'Zhang et al. ACS Nano 2012, 6, 5, 4349–4368'
'TiO2'	80	NaN	'12 h'	'MTT assay'	'EC50'	NaN	NaN	'Neuro 2A cells'	'Mammalian cells'	NaN	'Jeng et al. ron Sci Health A Tox Hazard Subst Environ Eng. 2006;41(12):2699-711'
'TiO2'	80	12.6	'24 h'	'ATP assay'	'EC50'	NaN	NaN	'RAW 2647 cells, ATP assay'	'Mammalian cells'	NaN	'Zhang et al. ACS Nano 2012, 6, 5, 4349–4368'
'ZnO'	81	13.6	'48 h'	'Membrane integrity'	'ec50'	6.9	8.51852e-05	'murine Fibroblasts (membrane integrity)'	'Mammalian cells'	-4.06964	'Bondarenko et al. Nanotoxicology, 2016; 10(9): 1229–1242'
'ZrO2'	123	40.1	'24 h'	'MTS assay'	'EC50'	NaN	NaN	'RAW 2647 cells, MTS assay'	'Mammalian cells'	NaN	'Zhang et al. ACS Nano 2012, 6, 5, 4349–4368'
'Fe2O3'	160	12.3	'24 h'	'MTS assay'	'EC50'	NaN	NaN	'RAW 2647 cells, MTS assay'	'Mammalian cells'	NaN	'Zhang et al. ACS Nano 2012, 6, 5, 4349–4368'
Mammalian cells - Fold 5
NP	Molar weight (g/mol)	Size	Exposure time	Assay	Endpoint	Value (mg/l	Value(mol/L)	Cell type	Cell group	Log(endpoint)	reference
'Co3O4'	241	10	'24 h'	'ATP assay'	'EC50'	22.3872	9.2893e-05	'RAW 2647 cells, ATP assay'	'Mammalian cells'	-4.03202	'Zhang et al. ACS Nano 2012, 6, 5, 4349–4368'
'CuO'	79.545	NaN	'24 h'	'resazurin fluorescence assay'	'ec50'	11	0.000138287	'Balb/c 3T3'	'Mammalian cells'	-3.85922	'Titma et al. Cytotechnology. 2016;68(6):2363-2377'
'Ni2O3'	165	140.6	'24 h'	'ATP assay'	'EC50'	87.0964	0.000527857	'RAW 2647 cells, ATP assay'	'Mammalian cells'	-3.27748	'Zhang et al. ACS Nano 2012, 6, 5, 4349–4368'
'Sb2O3'	292	NaN	'24 h'	'resazurin fluorescence assay'	'ec50'	15.3	5.23973e-05	'Balb/c 3T3'	'Mammalian cells'	-4.28069	'Titma et al. Cytotechnology. 2016;68(6):2363-2377'
'SiO2'	60	13.5	'24 h'	'ATP assay'	'EC50'	200	0.00333333	'RAW 2647 cells, ATP assay'	'Mammalian cells'	-2.47712	'Zhang et al. ACS Nano 2012, 6, 5, 4349–4368'
'SiO2'	60	13.5	'24 h'	'MTS assay'	'EC50'	200	0.00333333	'RAW 2647 cells, MTS assay'	'Mammalian cells'	-2.47712	'Zhang et al. ACS Nano 2012, 6, 5, 4349–4368'
'SnO2'	151	62.4	'24 h'	'MTS assay'	'EC50'	NaN	NaN	'RAW 2647 cells, MTS assay'	'Mammalian cells'	NaN	'Zhang et al. ACS Nano 2012, 6, 5, 4349–4368'
'TiO2'	80	14.2	'24 h'	'NRU assay'	'IC50'	NaN	NaN	'Balb/c'	'Mammalian cells'	NaN	'Ivansk et al. Curr Top Med Chem., 2015;15(18):1914-29'
'TiO2'	80	5	'-'	'WST-1'	'ec50'	NaN	NaN	'rat macrophages'	'Mammalian cells'	NaN	'Bondarenko et al. Nanotoxicology, 2016; 10(9): 1229–1242'
'ZnO'	81	NaN	'12 h'	'MTT assay'	'EC50'	50	0.00246914	'Neuro 2A cells'	'Mammalian cells'	-2.60746	'Jeng et al. ron Sci Health A Tox Hazard Subst Environ Eng. 2006;41(12):2699-711'
'Fe2O3'	160	12.3	'24 h'	'ATP assay'	'EC50'	NaN	NaN	'RAW 2647 cells, ATP assay'	'Mammalian cells'	NaN	'Zhang et al. ACS Nano 2012, 6, 5, 4349–4368'
