# Supplementary material for: Metal and metal oxide nanoparticle toxicity: moving towards a more holistic structure–activity approach
Source: Royal Society of Chemistry journal article supplement (doi:10.1039/d2en00897a), 2023-01-01
Supplement: d2en00897a5.xlsx [file d2en00897a5.xlsx]

## Sheet: Total dataset
Total dataset- Traning data
NP	Molar weight (g/mol)	Size	Exposure time	Assay	Endpoint	Value (mg/l	Value(mol/L)	Cell type	Cell group	Log(endpoint)	reference
'Ag'	108	5	'24 h'	'MTT'	'EC50'	1	9.25926e-06	'A549'	'Human cells'	-5.03342	'Liu et al. Nanotoxicology, 2010; 4(3): 319–330'
'Ag'	108	20	'24 h'	'MTT'	'EC50'	9.96	9.22222e-05	'A549'	'Human cells'	-4.03516	'Liu et al. Nanotoxicology, 2010; 4(3): 319–330'
'Ag'	108	50	'24 h'	'MTT'	'EC50'	13.3	0.000123148	'A549'	'Human cells'	-3.90957	'Liu et al. Nanotoxicology, 2010; 4(3): 319–330'
'Ag'	108	312	'24 h'	'MTT assay'	'IC50'	42.67	0.000395093	'a549'	'Human cells'	-3.4033	'Lanone et al. Particle and Fibre Toxicology 2009, 6:14'
'Ag'	108	312	'24 h'	'Neutral Red assay.'	'IC50'	380.9	0.00352685	'a549'	'Human cells'	-2.45261	'Lanone et al. Particle and Fibre Toxicology 2009, 6:25'
'Ag'	108	20.4	'4 h'	'growth inhibition assay'	'ec50'	4.5	4.16667e-05	'Bacillus subtilis'	'Bacteria'	-4.38021	'Bondarenko et al. Nanotoxicology, 2016; 10(9): 1229–1242'
'Ag'	108	26.6	'48 h'	'static renewal assay'	'LC50'	0.067	6.2037e-07	'Ceriodaphnia dubia (neonates)'	'Crustacean'	-6.20735	'Griffit et al. Environm. Toxicol. Chem. 2008; 27 (9) 1972–1978'
'Ag'	108	26.6	'48 h'	'static renewal assay'	'LC50'	7.07	6.5463e-05	'Danio rerio (adults)'	'Fish'	-4.184	'Griffit et al. Environm. Toxicol. Chem. 2008; 27 (9) 1972–1978'
'Ag'	108	NaN	'48 h'	'Acute toxicity assay'	'LC50'	2.9	2.68519e-05	'Danio rerio (adults)'	'Fish'	-4.57103	'Kovrižnychet al. Interdisciplinary Toxicology. 2013; Vol. 6(2): 67–73'
'Ag'	108	NaN	'48 h'	'Acute toxicity assay'	'LC50'	2.7	2.5e-05	'Danio rerio (eggs)'	'Fish'	-4.60206	'Kovrižnychet al. Interdisciplinary Toxicology. 2013; Vol. 6(2): 67–73'
'Ag'	108	3	'120 h'	'Acute toxicity (mortality)'	'LC50'	10.0775	9.331e-05	'Danio rerio (embryos)'	'Fish'	-4.03007	'Bar-Ilan et al. Small 2009; 5 (16) 1897-1910'
'Ag'	108	10	'120 h'	'Acute toxicity (mortality)'	'LC50'	13.5713	0.00012566	'Danio rerio (embryos)'	'Fish'	-3.9008	'Bar-Ilan et al. Small 2009; 5 (16) 1897-1910'
'Ag'	108	100	'120 h'	'Acute toxicity (mortality)'	'LC50'	14.8241	0.00013726	'Danio rerio (embryos)'	'Fish'	-3.86246	'Bar-Ilan et al. Small 2009; 5 (16) 1897-1910'
'Ag'	108	20	'120 h'	'Fish embryo survival'	'LC50'	0.529	4.89815e-06	'Danio rerio embryos'	'Fish'	-5.30997	'Lacave et al. Nanotechnology 27 (2016) 325102'
'Ag'	108	40	'120 h'	'Fish embryo survival'	'LC50'	3.94	3.64815e-05	'Danio rerio embryos'	'Fish'	-4.43793	'Lacave et al. Nanotechnology 27 (2016) 325102'
'Ag'	108	100	'120 h'	'Fish embryo survival'	'LC50'	1.973	1.82685e-05	'Danio rerio embryos'	'Fish'	-4.7383	'Lacave et al. Nanotechnology 27 (2016) 325102'
'Ag'	108	20	'48 h'	'Mortality test assay'	'LC50'	0.014	1.2963e-07	'Daphnia magna'	'Crustacean'	-6.8873	'Hoheisel et al. 2012, Environ. Toxicol. Chem. 31: 2557–2563'
'Ag'	108	20.4	'48 h'	'Immobilization'	'ec50'	0.003	2.77778e-08	'Daphnia magna'	'Crustacean'	-7.5563	'Bondarenko et al. Nanotoxicology, 2016; 10(9): 1229–1242'
'Ag'	108	30	'48 h'	'Mortality test assay'	'LC50'	0.018	1.66667e-07	'Daphnia magna'	'Crustacean'	-6.77815	'Hoheisel et al. 2012, Environ. Toxicol. Chem. 31: 2557–2563'
'Ag'	108	30	'48 h'	'Mortality test assay'	'LC50'	0.018	1.66667e-07	'Daphnia magna'	'Crustacean'	-6.77815	'Hoheisel et al. 2012, Environ. Toxicol. Chem. 31: 2557–2563'
'Ag'	108	50	'48 h'	'Mortality test assay'	'LC50'	0.024	2.22222e-07	'Daphnia magna'	'Crustacean'	-6.65321	'Hoheisel et al. 2012, Environ. Toxicol. Chem. 31: 2557–2563'
'Ag'	108	50	'48 h'	'Mortality test assay'	'LC50'	0.03	2.77778e-07	'Daphnia magna'	'Crustacean'	-6.5563	'Hoheisel et al. 2012, Environ. Toxicol. Chem. 31: 2557–2563'
'Ag'	108	26.6	'48 h'	'static renewal assay'	'LC50'	0.04	3.7037e-07	'Daphnia pulex (adults)'	'Crustacean'	-6.43136	'Griffit et al. Environm. Toxicol. Chem. 2008; 27 (9) 1972–1978'
'Ag'	108	NaN	'2 h'	'luminescence inhbition'	'ec50'	45.9	0.000425	'E. coli AB1157'	'Bacteria'	-3.37161	'Ivansk et al Anal Bioanal Chem (2010) 398:701–716'
'Ag'	108	NaN	'2 h'	'luminescence inhbition'	'ec50'	3.11	2.87963e-05	'E. coli AS391'	'Bacteria'	-4.54066	'Ivansk et al Anal Bioanal Chem (2010) 398:701–716'
'Ag'	108	NaN	'30 min'	'luminescence inhbition'	'ec50'	5.8	5.37037e-05	'E. coli AS391'	'Bacteria'	-4.27	'Ivansk et al Anal Bioanal Chem (2010) 398:701–716'
'Ag'	108	NaN	'2 h'	'luminescence inhbition'	'ec50'	19.7	0.000182407	'E. coli AS393'	'Bacteria'	-3.73896	'Ivansk et al Anal Bioanal Chem (2010) 398:701–716'
'Ag'	108	NaN	'30 min'	'luminescence inhbition'	'ec50'	329	0.0030463	'E. coli AS393'	'Bacteria'	-2.51623	'Ivansk et al Anal Bioanal Chem (2010) 398:701–716'
'Ag'	108	NaN	'2 h'	'luminescence inhbition'	'ec50'	30.9	0.000286111	'E. coli JI130'	'Bacteria'	-3.54347	'Ivansk et al Anal Bioanal Chem (2010) 398:701–716'
'Ag'	108	NaN	'30 min'	'luminescence inhbition'	'ec50'	331	0.00306481	'E. coli JI130'	'Bacteria'	-2.5136	'Ivansk et al Anal Bioanal Chem (2010) 398:701–716'
'Ag'	108	NaN	'2 h'	'luminescence inhbition'	'ec50'	18.8	0.000174074	'E. coli JI131'	'Bacteria'	-3.75927	'Ivansk et al Anal Bioanal Chem (2010) 398:701–716'
'Ag'	108	NaN	'30 min'	'luminescence inhbition'	'ec50'	485	0.00449074	'E. coli JI131'	'Bacteria'	-2.34768	'Ivansk et al Anal Bioanal Chem (2010) 398:701–716'
'Ag'	108	20.4	'4 h'	'growth inhibition assay'	'ec50'	3.1	2.87037e-05	'Escherichia Coli'	'Bacteria'	-4.54206	'Bondarenko et al. Nanotoxicology, 2016; 10(9): 1229–1242'
'Ag'	108	50	'24 h'	'Cytotoxicity assay'	'LD50'	48.2	0.00185185	'Hacat cells'	'Human cells'	-2.73239	'Comfort et al. Colloids Surf B Biointerfaces,2014;123:136-42'
'Ag'	108	5	'24 h'	'MTT'	'EC50'	0.59	5.46296e-06	'HepG2'	'Human cells'	-5.26257	'Liu et al. Nanotoxicology, 2010; 4(3): 319–330'
'Ag'	108	20	'24 h'	'MTT'	'EC50'	25.5	0.000236111	'HepG2'	'Human cells'	-3.62688	'Liu et al. Nanotoxicology, 2010; 4(3): 319–330'
'Ag'	108	50	'24 h'	'MTT'	'EC50'	33.6	0.000311111	'HepG2'	'Human cells'	-3.50708	'Liu et al. Nanotoxicology, 2010; 4(3): 319–330'
'Ag'	108	20.4	'24 h'	'MTT assay'	'ec50'	4.6	4.25926e-05	'human mesenchymal stem cells (MTT)'	'Human cells'	-4.37067	'Bondarenko et al. Nanotoxicology, 2016; 10(9): 1229–1242'
'Ag'	108	5	'24 h'	'MTT'	'EC50'	0.5	4.62963e-06	'MCF‐7'	'Human cells'	-5.33445	'Liu et al. Nanotoxicology, 2010; 4(3): 319–330'
'Ag'	108	20	'24 h'	'MTT'	'EC50'	14.3	0.000132407	'MCF‐7'	'Human cells'	-3.87809	'Liu et al. Nanotoxicology, 2010; 4(3): 319–330'
'Ag'	108	20.4	'4 h'	'growth inhibition assay'	'ec50'	3.2	2.96296e-05	'Pseudomonas aeruginosa'	'Bacteria'	-4.52827	'Bondarenko et al. Nanotoxicology, 2016; 10(9): 1229–1242'
'Ag'	108	20.4	'4 h'	'growth inhibition assay'	'ec50'	3.8	3.51852e-05	'Pseudomonas putida'	'Bacteria'	-4.45364	'Bondarenko et al. Nanotoxicology, 2016; 10(9): 1229–1242'
'Ag'	108	20.4	'-'	'WST-1'	'ec50'	9.8	9.07407e-05	'rat macrophages'	'Mammalian cells'	-4.0422	'Bondarenko et al. Nanotoxicology, 2016; 10(9): 1229–1242'
'Ag'	108	20	'24 h'	'metabolic activity (alamarBlue® assay'	'ec50'	15	0.000138889	'RTgutGC'	'Fish'	-3.85733	'Geppert et al. Environ. Sci.: Nano, 2021,8, 2249-2260'
'Ag'	108	20.4	'24 h'	'Viability assay'	'ec50'	3.9	3.61111e-05	'Tetrahymena thermophila'	'Eukaryotes & Microalgae'	-4.44236	'Bondarenko et al. Nanotoxicology, 2016; 10(9): 1229–1242'
'Ag'	108	312	'24 h'	'MTT assay'	'IC50'	19.33	0.000178981	'THP-1'	'Human cells'	-3.74719	'Lanone et al. Particle and Fibre Toxicology 2009, 6:14'
'Ag'	108	312	'24 h'	'MTT assay'	'IC50'	55.6	0.000514815	'THP-1'	'Human cells'	-3.28835	'Lanone et al. Particle and Fibre Toxicology 2009, 6:14'
'Ag'	108	312	'24 h'	'MTT assay'	'IC50'	1408	0.013037	'THP-1'	'Human cells'	-1.88482	'Lanone et al. Particle and Fibre Toxicology 2009, 6:14'
'Ag'	108	312	'24 h'	'Neutral Red assay.'	'IC50'	18.36	0.00017	'THP-1'	'Human cells'	-3.76955	'Lanone et al. Particle and Fibre Toxicology 2009, 6:29'
'Ag'	108	312	'24 h'	'Neutral Red assay.'	'IC50'	27.6	0.000255556	'THP-1'	'Human cells'	-3.59251	'Lanone et al. Particle and Fibre Toxicology 2009, 6:29'
'Ag'	108	20.4	'30 min'	'bioluminescence inhibition assay'	'ec50'	2.9	2.68519e-05	'Vibrio fischeri'	'Bacteria'	-4.57103	'Bondarenko et al. Nanotoxicology, 2016; 10(9): 1229–1242'
'Ag'	108	30	'6 h'	'Cytotoxicity assay'	'EC50'	3.86	3.57407e-05	'Saccharomyces cerevisae'	'Eukaryotes & Microalgae'	-4.44684	'Zhang et al., J Nanopart Res (2016) 18 (2), 372'
'Ag'	108	30	'48 h'	'Cytotoxicity assay'	'EC50'	0.45	4.16667e-06	'Saccharomyces cerevisae'	'Eukaryotes & Microalgae'	-5.38021	'Zhang et al., J Nanopart Res (2016) 18 (2), 372'
'Ag'	108	NaN	'24 h'	'Cell viability (MTT assay)'	'EC50'	78.9	0.000730556	'HeLa cells'	'Human cells'	-3.13635	'Kim et al. Bull. Korean Chem. Soc. 2012, Vol. 33, No. 10'
'Ag'	108	NaN	'24 h'	'Cell viability (MTT assay)'	'EC50'	88.6	0.00082037	'PC3'	'Human cells'	-3.08599	'Kim et al. Bull. Korean Chem. Soc. 2012, Vol. 33, No. 10'
'Ag2O'	233	NaN	'16 h'	'growth inhibition CFU assay'	'IC50'	9	3.86266e-05	'E.coli'	'Bacteria'	-4.41311	'Negi et al. J Gen Appl Microbiol. 2013;59(1):83-8'
'Ag2O'	233	NaN	'16 h'	'growth inhibition CFU assay'	'IC50'	9	3.86266e-05	'P. aeruginosa'	'Bacteria'	-4.41311	'Negi et al. J Gen Appl Microbiol. 2013;59(1):83-8'
'Ag2O'	232	NaN	'6 days'	'Growth inhibition assay'	'EC50'	109.98	0.000474052	'Vignia radiata'	'Plants'	-3.32417	'Singh et al. Bull Environ Contam Toxicol (2015) 95:379–384'
'Ag2O'	232	NaN	'6 days'	'Growth inhibition assay'	'EC50'	122	0.000525862	'Vignia radiata'	'Plants'	-3.27913	'Singh et al. Bull Environ Contam Toxicol (2015) 95:379–384'
'Ag2O'	232	NaN	'6 days'	'Growth inhibition assay'	'EC50'	144	0.00062069	'Vignia radiata'	'Plants'	-3.20713	'Singh et al. Bull Environ Contam Toxicol (2015) 95:379–384'
'Al'	27	18	'2 h'	'growth inhibition assay'	'IC50'	2000	0.0740741	'Brassica napus'	'Plant'	-1.13033	'Lin et al. Environm. Pollut. 2007 150 (2) 243-250'
'Al'	27	41.7	'48 h'	'static renewal assay'	'LC50'	3.99	0.000147778	'Ceriodaphnia dubia (neonates)'	'Crustacean'	-3.83039	'Griffit et al. Environm. Toxicol. Chem. 2008; 27 (9) 1972–1978'
'Al'	27	18	'2 h'	'growth inhibition assay'	'IC50'	2000	0.0740741	'Lolium perenne'	'Plants'	-1.13033	'Lin et al. Environm. Pollut. 2007 150 (2) 243-250'
'Al'	27	18	'2 h'	'growth inhibition assay'	'IC50'	2000	0.0740741	'Raphanus sativus'	'Plants'	-1.13033	'Lin et al. Environm. Pollut. 2007 150 (2) 243-250'
'Al2O3'	102	31	'24 h'	'MTT assay'	'ec50'	1000	0.00980392	'A549'	'Human cells'	-2.0086	'Horie et al. Metallomics, 2012, 4, 350–360'
'Al2O3'	102	11.9	'24 h'	'CCK-8 cytotoxicity assay'	'EC50'	705.668	0.00691831	'A549 cells'	'Human cells'	-2.16	'Cao et al. Green Chem., 2020,22, 3512-3521'
'Al2O3'	102	28.15	'24 h'	'Cytotoxicity (PI staining)'	'ec50 (in SFM medium)'	NaN	NaN	'A549 cells'	'Human cells'	NaN	'Areecheewakul, et al. NanoImpact 18 (2020) 100214'
'Al2O3'	102	14.7	'24 h'	'ATP assay'	'EC50'	NaN	NaN	'BEAS-2B cells, ATP assay'	'Human cells'	NaN	'Zhang et al. ACS Nano 2012, 6, 5, 4349–4368'
'Al2O3'	102	14.7	'24 h'	'MTS assay'	'EC50'	NaN	NaN	'BEAS-2B cells, MTS assay'	'Human cells'	NaN	'Zhang et al. ACS Nano 2012, 6, 5, 4349–4368'
'Al2O3'	102	60	'2 h'	'growth inhibition assay'	'IC50'	2000	0.0196078	'Brassica napus'	'Plant'	-1.70757	'Lin et al. Environm. Pollut. 2007 150 (2) 243-250'
'Al2O3'	102	NaN	'48 h'	'Acute toxicity assay'	'LC50'	800	0.00784314	'Danio rerio (adults)'	'Fish'	-2.10551	'Kovrižnychet al. Interdisciplinary Toxicology. 2013; Vol. 6(2): 67–73'
'Al2O3'	102	NaN	'48 h'	'Acute toxicity assay'	'LC50'	800	0.00784314	'Danio rerio (eggs)'	'Fish'	-2.10551	'Kovrižnychet al. Interdisciplinary Toxicology. 2013; Vol. 6(2): 67–73'
'Al2O3'	102	80	'96 h'	'embryo-larval bioassay'	'LC50'	1000	0.00980392	'Danio rerio (embryos)'	'Fish'	-2.0086	'Zhu et al., J. Environ. Sci. Health A Tox. Hazard Subst. Environ. Eng. 2008; 43 (3) 278-286'
'Al2O3'	102	80	'84 h'	'embryo-larval bioassay'	'eC50'	1000	0.00980392	'Danio rerio (embryos)'	'Fish'	-2.0086	'Zhu et al., J. Environ. Sci. Health A Tox. Hazard Subst. Environ. Eng. 2008; 43 (3) 278-287'
'Al2O3'	102	80	'48 h'	'Acute toxicity (mortality)'	'EC50'	500	0.00490196	'Daphnia magna (neonates)'	'Crustacean'	-2.30963	'Zhu et al., J. Nanopart. Res. 2009; 11 (1) 67–75'
'Al2O3'	102	14.7	'24 h'	'growth inhibition assay'	'IC50'	500	0.00490196	'E.coli'	'Bacteria'	-2.30963	'Kaweeteerawat et al. Environ. Sci. Technol. 2015, 49, 1105−1112'
'Al2O3'	102	NaN	'2 h'	'Cell viability assay CFU'	'EC50'	330.066	0.00323594	'E.coli'	'Bacteria'	-2.49	'Puzyn et al. Nature Nanotech 6, 175–178 (2011)'
'Al2O3'	102	44	'24 h'	'CytoTox-Glo Cytotoxicity Assay'	'LC50'	1439	0.0141078	'Hacat cells'	'Human cells'	-1.85054	'Gajewicz et al. Nanotoxicology, 2015;9(3):313-25'
'Al2O3'	102	NaN	'4 days'	'growth inhibition assay'	'EC50'	1000	0.00980392	'Lactuca sativa L.'	'Plants'	-2.0086	'Kong et al. Nanomaterials 2021, 11, 1653'
'Al2O3'	102	NaN	'4 days'	'growth inhibition assay'	'EC50'	1000	0.00980392	'Lactuca sativa L.'	'Plants'	-2.0086	'Kong et al. Nanomaterials 2021, 11, 1653'
'Al2O3'	102	60	'2 h'	'growth inhibition assay'	'IC50'	2000	0.0196078	'Lolium perenne'	'Plants'	-1.70757	'Lin et al. Environm. Pollut. 2007 150 (2) 243-250'
'Al2o3'	102	NaN	'12 h'	'MTT assay'	'EC50'	NaN	NaN	'Neuro 2A cells'	'Mammalian cells'	NaN	'Jeng et al. ron Sci Health A Tox Hazard Subst Environ Eng. 2006;41(12):2699-711'
'Al2O3'	102	83.5	'48 h'	'Static acute toxicity'	'LC50'	9269.2	0.0908745	'P. multimicronucleatum'	'Eukaryotes & Microalgae'	-1.04156	'Li et al. 2012, Chem. Res. Toxicol, 25, 1675−1681'
'Al2O3'	102	60	'2 h'	'growth inhibition assay'	'IC50'	2000	0.0196078	'Raphanus sativus'	'Plants'	-1.70757	'Lin et al. Environm. Pollut. 2007 150 (2) 243-250'
'Al2O3'	102	NaN	'4 days'	'growth inhibition assay'	'EC50'	1000	0.00980392	'Raphanus sativus'	'Plants'	-2.0086	'Kong et al. Nanomaterials 2021, 11, 1653'
'Al2O3'	102	14.7	'24 h'	'ATP assay'	'EC50'	NaN	NaN	'RAW 2647 cells, ATP assay'	'Mammalian cells'	NaN	'Zhang et al. ACS Nano 2012, 6, 5, 4349–4368'
'Al2O3'	102	14.7	'24 h'	'MTS assay'	'EC50'	NaN	NaN	'RAW 2647 cells, MTS assay'	'Mammalian cells'	NaN	'Zhang et al. ACS Nano 2012, 6, 5, 4349–4368'
'Al2O3'	102	NaN	'24 h'	'MTT assay'	'IC50'	866	0.0084902	'THP-1'	'Human cells'	-2.07108	'Lanone et al. Particle and Fibre Toxicology 2009, 6:14'
'Al2O3'	102	NaN	'24 h'	'MTT assay'	'IC50'	82.19	0.000805784	'THP-1'	'Human cells'	-3.09378	'Lanone et al. Particle and Fibre Toxicology 2009, 6:14'
'Al2O3'	102	NaN	'24 h'	'Neutral Red assay.'	'IC50'	672.5	0.00659314	'THP-1'	'Human cells'	-2.18091	'Lanone et al. Particle and Fibre Toxicology 2009, 6:29'
'Al2O3'	102	50	'10 h'	'Activity inhibition'	'IC50'	1000	0.00980392	'Saccharomyces cerevisae'	'Eukaryotes & Microalgae'	-2.0086	'García-Saucedo et al. / Journal of Hazardous Materials 192 (2011) 1572–1579'
'Al2O3'	102	50	'10 h'	'Activity inhibition'	'IC50'	1000	0.00980392	'Saccharomyces cerevisae'	'Eukaryotes & Microalgae'	-2.0086	'García-Saucedo et al. / Journal of Hazardous Materials 192 (2011) 1572–1579'
'Al2O3'	102	50	'10 h'	'FungaLight kit, membrane damage assay'	'EC50'	1000	0.00980392	'Saccharomyces cerevisae'	'Eukaryotes & Microalgae'	-2.0086	'García-Saucedo et al. / Journal of Hazardous Materials 192 (2011) 1572–1579'
'Au'	197	5	'120 h'	'Fish embryo survival'	'LC50'	24.655	0.000125152	'Danio rerio embryos'	'Fish'	-3.90256	'Lacave et al. Nanotechnology 27 (2016) 325102'
'Au'	197	15	'120 h'	'Fish embryo survival'	'LC50'	24.61	0.000124924	'Danio rerio embryos'	'Fish'	-3.90335	'Lacave et al. Nanotechnology 27 (2016) 325102'
'Au'	197	40	'120 h'	'Fish embryo survival'	'LC50'	34.717	0.000176228	'Danio rerio embryos'	'Fish'	-3.75392	'Lacave et al. Nanotechnology 27 (2016) 325102'
'Au'	197	NaN	'24 h'	'Cell viability (MTT assay)'	'EC50'	66.4	0.000337056	'HeLa cells'	'Human cells'	-3.4723	'Kim et al. Bull. Korean Chem. Soc. 2012, Vol. 33, No. 10'
'Au'	197	5	'24 h'	'MTT assay'	'LC50'	76.358	0.000387604	'hemocytes'	'other'	-3.41161	'Katsumiti et al. Nanotoxicology. 2016;10(2):185-93'
'Au'	197	15	'24 h'	'MTT assay'	'LC50'	81.66	0.000414518	'hemocytes'	'other'	-3.38246	'Katsumiti et al. Nanotoxicology. 2016;10(2):185-94'
'Au'	197	40	'24 h'	'MTT assay'	'LC50'	83.472	0.000423716	'hemocytes'	'other'	-3.37293	'Katsumiti et al. Nanotoxicology. 2016;10(2):185-95'
'Au'	197	NaN	'24 h'	'Cell viability (MTT assay)'	'EC50'	82.9	0.000420812	'PC3'	'Human cells'	-3.37591	'Kim et al. Bull. Korean Chem. Soc. 2012, Vol. 33, No. 10'
'Bi2O3'	466	149	'24 h'	'MTT'	'LC50'	25	5.36481e-05	'A549'	'Human cells'	-4.27045	'Abudayyak et al. / Chemosphere 169 (2017) 117e123118'
'Bi2O3'	466	164.97	'24 h'	'CCK-8 cytotoxicity assay'	'EC50'	337.587	0.000724436	'A549 cells'	'Human cells'	-3.14	'Cao et al. Green Chem., 2020,22, 3512-3521'
'Bi2O3'	466	149	'24 h'	'NRU assay'	'LC50'	75	0.000160944	'Caco-2'	'Human cells'	-3.79332	'Abudayyak et al. / Chemosphere 169 (2017) 117e123118'
'Bi2O3'	466	NaN	'48 h'	'Acute toxicity assay'	'LC50'	1600	0.00343348	'Danio rerio (eggs)'	'Fish'	-2.46427	'Kovrižnychet al. Interdisciplinary Toxicology. 2013; Vol. 6(2): 67–73'
'Bi2O3'	466	144	'30 min'	'Cell viability assay CFU'	'LC50'	131.337	0.000281838	'E.coli'	'Bacteria'	-3.55	'Pathakoti et al. Journal of Photochemistry and Photobiology B: Biology 130 (2014) 234–240'
'Bi2O3'	466	90	'24 h'	'CytoTox-Glo Cytotoxicity Assay'	'LC50'	1459	0.0031309	'Hacat cells'	'Human cells'	-2.50433	'Gajewicz et al. Nanotoxicology, 2015;9(3):313-25'
'Bi2O3'	466	149	'24 h'	'MTT'	'LC50'	25	5.36481e-05	'HepG2'	'Human cells'	-4.27045	'Abudayyak et al. / Chemosphere 169 (2017) 117e123118'
'Bi2O3'	466	149	'24 h'	'NRU assay'	'LC50'	100	0.000214592	'HepG2'	'Human cells'	-3.66839	'Abudayyak et al. / Chemosphere 169 (2017) 117e123118'
'Bi2O3'	466	149	'24 h'	'MTT'	'LC50'	100	0.000214592	'NRK-52E'	'Human cells'	-3.66839	'Abudayyak et al. / Chemosphere 169 (2017) 117e123118'
'Bi2O3'	466	149	'24 h'	'NRU assay'	'LC50'	100	0.000214592	'NRK-52E'	'Human cells'	-3.66839	'Abudayyak et al. / Chemosphere 169 (2017) 117e123118'
'CaO'	56	NaN	'48 h'	'Acute toxicity assay'	'LC50'	260	0.00464286	'Danio rerio (adults)'	'Fish'	-2.33321	'Kovrižnychet al. Interdisciplinary Toxicology. 2013; Vol. 6(2): 67–73'
'CaO'	56	NaN	'48 h'	'Acute toxicity assay'	'LC50'	290	0.00517857	'Danio rerio (eggs)'	'Fish'	-2.28579	'Kovrižnychet al. Interdisciplinary Toxicology. 2013; Vol. 6(2): 67–73'
'CeO2'	172	14	'24 h'	'MTT assay'	'ec50'	1000	0.00581395	'A549'	'Human cells'	-2.23553	'Horie et al. Metallomics, 2012, 4, 350–360'
'CeO2'	172	NaN	'48 h'	'Cellular proliferation colorimetric assay'	'LD 50'	1000	0.00581395	'A549'	'Human cells'	-2.23553	'Lozano et al 2011 J. Phys.: Conf. Ser. 304 012046'
'CeO2'	172	7.2	'2 h'	'growth inhibition assay'	'IC50'	1000	0.00581395	'Brassica napus'	'Plant'	-2.23553	'Ma et al. Chemosphere 2010; 78 (3) 273-279'
'CeO2'	172	7.2	'2 h'	'growth inhibition assay'	'IC50'	1000	0.00581395	'Cucumis sativus'	'Plant'	-2.23553	'Ma et al. Chemosphere 2010; 78 (3) 273-279'
'CeO2'	172	25	'2 h'	'Cell Viability CFU assay'	'ec50'	64.05	0.000372384	'E Coli'	'Bacteria'	-3.42901	'Kar et al. Chemosphere 264 (2021) 128428'
'CeO2'	172	18.3	'24 h'	'growth inhibition assay'	'IC50'	NaN	NaN	'E.coli'	'Bacteria'	NaN	'Kaweeteerawat et al. Environ. Sci. Technol. 2015, 49, 1105−1112'
'CeO2'	172	NaN	'24 h'	'Cellular proliferation colorimetric assay'	'LD 50'	1000	0.00581395	'HeLa cells'	'Human cells'	-2.23553	'Lozano et al 2011 J. Phys.: Conf. Ser. 304 012046'
'CeO2'	172	NaN	'48 h'	'Cellular proliferation colorimetric assay'	'LD 50'	1000	0.00581395	'HeLa cells'	'Human cells'	-2.23553	'Lozano et al 2011 J. Phys.: Conf. Ser. 304 012046'
'CeO2'	172	NaN	'48 h'	'Cellular proliferation colorimetric assay'	'LD 50'	1000	0.00581395	'NCl H460'	'Human cells'	-2.23553	'Lozano et al 2011 J. Phys.: Conf. Ser. 304 012046'
'CeO2'	172	33.4	'24 h'	'MTT assay'	'IC50'	1058	0.00615116	'THP-1'	'Human cells'	-2.21104	'Lanone et al. Particle and Fibre Toxicology 2009, 6:14'
'CeO2'	172	33.4	'24 h'	'Neutral Red assay.'	'IC50'	476.6	0.00277093	'THP-1'	'Human cells'	-2.55737	'Lanone et al. Particle and Fibre Toxicology 2009, 6:29'
'CeO2'	172	50	'10 h'	'Activity inhibition'	'IC50'	1000	0.00581395	'Saccharomyces cerevisae'	'Eukaryotes & Microalgae'	-2.23553	'García-Saucedo et al. / Journal of Hazardous Materials 192 (2011) 1572–1579'
'CeO2'	172	50	'10 h'	'Activity inhibition'	'IC50'	1000	0.00581395	'Saccharomyces cerevisae'	'Eukaryotes & Microalgae'	-2.23553	'García-Saucedo et al. / Journal of Hazardous Materials 192 (2011) 1572–1579'
'CeO2'	172	50	'10 h'	'FungaLight kit, membrane damage assay'	'EC50'	1000	0.00581395	'Saccharomyces cerevisae'	'Eukaryotes & Microalgae'	-2.23553	'García-Saucedo et al. / Journal of Hazardous Materials 192 (2011) 1572–1579'
'Co'	59	20	'24 h'	'MTT assay'	'IC50'	1142	0.0193559	'a549'	'Human cells'	-1.71319	'Lanone et al. Particle and Fibre Toxicology 2009, 6:14'
'Co'	59	20	'24 h'	'MTT assay'	'IC50'	3039	0.0515085	'a549'	'Human cells'	-1.28812	'Lanone et al. Particle and Fibre Toxicology 2009, 6:14'
'Co'	59	20	'24 h'	'Neutral Red assay.'	'IC50'	1243	0.0210678	'a549'	'Human cells'	-1.67638	'Lanone et al. Particle and Fibre Toxicology 2009, 6:26'
'Co'	59	10.5	'48 h'	'static renewal assay'	'LC50'	1.67	2.83051e-05	'Ceriodaphnia dubia (neonates)'	'Crustacean'	-4.54814	'Griffit et al. Environm. Toxicol. Chem. 2008; 27 (9) 1972–1978'
'Co'	59	30	'96 h'	'growth inhibition assay'	'EC50'	38.6	0.000654237	'Chaetoceros curvisetus'	'Eukaryotes & Microalgae'	-3.18426	'X. Chen et al. Environmental Pollution 236 (2018) 454e461'
'Co'	59	NaN	'24 h'	'Cell viability (MTT assay)'	'EC50'	71.8	0.00121695	'HeLa cells'	'Human cells'	-2.91473	'Kim et al. Bull. Korean Chem. Soc. 2012, Vol. 33, No. 10'
'Co'	59	NaN	'24 h'	'Cell viability (MTT assay)'	'EC50'	77.5	0.00131356	'PC3'	'Human cells'	-2.88155	'Kim et al. Bull. Korean Chem. Soc. 2012, Vol. 33, No. 10'
'Co'	59	30	'96 h'	'growth inhibition assay'	'EC50'	21.5	0.000364407	'Skeletonema costatum'	'Eukaryotes & Microalgae'	-3.43841	'X. Chen et al. Environmental Pollution 236 (2018) 454e461'
'Co'	59	20	'24 h'	'MTT assay'	'IC50'	1.42	2.40678e-05	'THP-1'	'Human cells'	-4.61856	'Lanone et al. Particle and Fibre Toxicology 2009, 6:14'
'Co'	59	20	'24 h'	'Neutral Red assay.'	'IC50'	164.7	0.00279153	'THP-1'	'Human cells'	-2.55416	'Lanone et al. Particle and Fibre Toxicology 2009, 6:29'
'Co2O3'	166	NaN	'2 h'	'Cell Viability CFU assay'	'ec50'	77.145	0.000464729	'E Coli'	'Bacteria'	-3.3328	'Kar et al. Chemosphere 264 (2021) 128428'
'Co3O4'	241	9.2	'24 h'	'NRU assay'	'IC50'	130.9	0.000543154	'A549'	'Human cells'	-3.26508	'Ivansk et al. Curr Top Med Chem., 2015;15(18):1914-29'
'Co3O4'	241	NaN	'12 h'	'resazurin fluorescence assay'	'ec50'	105.4	0.000437344	'A549'	'Human cells'	-3.35918	'Titma et al. Cytotechnology. 2016;68(6):2363-2377'
'Co3O4'	241	NaN	'108'	'resazurin fluorescence assay'	'ec50'	107.3	0.000445228	'A549'	'Human cells'	-3.35142	'Titma et al. Cytotechnology. 2016;68(6):2363-2377'
'Co3O4'	241	NaN	'36 h'	'resazurin fluorescence assay'	'ec50'	108.1	0.000448548	'A549'	'Human cells'	-3.34819	'Titma et al. Cytotechnology. 2016;68(6):2363-2377'
'Co3O4'	241	9.2	'24 h'	'NRU assay'	'IC50'	135.5	0.000562241	'Balb/c'	'Mammalian cells'	-3.25008	'Ivansk et al. Curr Top Med Chem., 2015;15(18):1914-29'
'Co3O4'	241	10	'24 h'	'ATP assay'	'EC50'	23.4423	9.72709e-05	'BEAS-2B cells, ATP assay'	'Human cells'	-4.01202	'Zhang et al. ACS Nano 2012, 6, 5, 4349–4368'
'Co3O4'	241	NaN	'72 h'	'Growth inhibition assay'	'EC50'	38.16	0.00015834	'C. minutissima'	'Eukaryotes & Microalgae'	-3.80041	'Sharan et al. Aquatic Toxicology 224 (2020) 105498'
'Co3O4'	241	9.2	'24 h'	'NRU assay'	'IC50'	123	0.000510373	'Caco2'	'Human cells'	-3.29211	'Ivansk et al. Curr Top Med Chem., 2015;15(18):1914-29'
'Co3O4'	241	NaN	'3 days'	'Phytotoxicity (root length)'	'EC50'	5000	0.0207469	'Cucumis sativus'	'Plant'	-1.68305	'Wu et al. J Pet Environ Biotechnol, 2012, 3:126'
'Co3O4'	241	NaN	'2 h'	'Cell Viability CFU assay'	'ec50'	240	0.000995851	'E Coli'	'Bacteria'	-3.00181	'Kar et al. Chemosphere 264 (2021) 128428'
'Co3O4'	241	10	'24 h'	'growth inhibition assay'	'IC50'	138	0.000572614	'E.coli'	'Bacteria'	-3.24214	'Kaweeteerawat et al. Environ. Sci. Technol. 2015, 49, 1105−1112'
'Co3O4'	241	78.3	'30 min'	'Cytotoxicity assays'	'LC50'	55.56	0.000230539	'Escherichia Coli'	'Bacteria'	-3.63725	'Dasari et al. J Environ Sci, 2013;25(5):882-8'
'Co3O4'	241	NaN	'7 days'	'Almarblue assay'	'EC50'	8.917	3.7e-05	'HaCaT cells'	'Human cells'	-4.4318	'Mauro et al. Int. J. Environ. Res. Public Health 2015, 12, 8263-8280'
'Co3O4'	241	NaN	'24 h'	'Almarblue assay'	'EC50'	241	0.001	'HaCaT cells'	'Human cells'	-3	'Mauro et al. Int. J. Environ. Res. Public Health 2015, 12, 8263-8280'
'Co3O4'	241	NaN	'48 h'	'Almarblue assay'	'EC50'	241	0.001	'HaCaT cells'	'Human cells'	-3	'Mauro et al. Int. J. Environ. Res. Public Health 2015, 12, 8263-8280'
'Co3O4'	241	NaN	'7 days'	'MTT assay'	'EC50'	31.33	0.00013	'HaCaT cells'	'Human cells'	-3.88606	'Mauro et al. Int. J. Environ. Res. Public Health 2015, 12, 8263-8280'
'Co3O4'	241	NaN	'24 h'	'MTT assay'	'EC50'	241	0.001	'HaCaT cells'	'Human cells'	-3	'Mauro et al. Int. J. Environ. Res. Public Health 2015, 12, 8263-8280'
'Co3O4'	241	NaN	'48 h'	'MTT assay'	'EC50'	241	0.001	'HaCaT cells'	'Human cells'	-3	'Mauro et al. Int. J. Environ. Res. Public Health 2015, 12, 8263-8280'
'Co3O4'	241	NaN	'3 days'	'Phytotoxicity (root length)'	'EC50'	5000	0.0207469	'Lactuca sativa'	'Plants'	-1.68305	'Wu et al. J Pet Environ Biotechnol, 2012, 3:126'
'Co3O4'	241	NaN	'3 days'	'Phytotoxicity (root length)'	'EC50'	5000	0.0207469	'Raphanus sativus'	'Plants'	-1.68305	'Wu et al. J Pet Environ Biotechnol, 2012, 3:126'
'Co3O4'	241	10	'24 h'	'MTS assay'	'EC50'	389.045	0.0016143	'RAW 2647 cells, MTS assay'	'Mammalian cells'	-2.79202	'Zhang et al. ACS Nano 2012, 6, 5, 4349–4368'
'CoO'	75	50	'24 h'	'Cell viability'	'EC50'	12.5	0.000166667	'BEAS-2B'	'Human cells'	-3.77815	'Huang et al. Materials 2010, 3, 4842-4859;'
'CoO'	75	71.8	'24 h'	'ATP assay'	'EC50'	43.6516	0.000582021	'BEAS-2B cells, ATP assay'	'Human cells'	-3.23506	'Zhang et al. ACS Nano 2012, 6, 5, 4349–4368'
'CoO'	75	71.8	'24 h'	'MTS assay'	'EC50'	51.2861	0.000683815	'BEAS-2B cells, MTS assay'	'Human cells'	-3.16506	'Zhang et al. ACS Nano 2012, 6, 5, 4349–4368'
'CoO'	75	55	'30 min'	'Cell viability assay CFU'	'LC50'	55.5983	0.00074131	'E.coli'	'Bacteria'	-3.13	'Pathakoti et al. Journal of Photochemistry and Photobiology B: Biology 130 (2014) 234–240'
'CoO'	75	71.8	'24 h'	'growth inhibition assay'	'IC50'	43	0.000573333	'E.coli'	'Bacteria'	-3.24159	'Kaweeteerawat et al. Environ. Sci. Technol. 2015, 49, 1105−1112'
'CoO'	75	71.8	'24 h'	'ATP assay'	'EC50'	47.863	0.000638173	'RAW 2647 cells, ATP assay'	'Mammalian cells'	-3.19506	'Zhang et al. ACS Nano 2012, 6, 5, 4349–4368'
'CoO'	75	71.8	'24 h'	'MTS assay'	'EC50'	63.0957	0.000841276	'RAW 2647 cells, MTS assay'	'Mammalian cells'	-3.07506	'Zhang et al. ACS Nano 2012, 6, 5, 4349–4368'
'CoO'	75	75	'24 h'	'MTS assay'	'EC50'	60	0.0008	'THP-1 CELLS'	'Human cells'	-3.09691	'Jeong et al. Front Pharmacol. 2018 22;9:15.'
'Cr2O3'	152	61.38	'24 h'	'CCK-8 cytotoxicity assay'	'EC50'	115.304	0.000758578	'A549 cells'	'Human cells'	-3.12	'Cao et al. Green Chem., 2020,22, 3512-3521'
'Cr2O3'	152	193	'24 h'	'ATP assay'	'EC50'	35.4813	0.00023343	'BEAS-2B cells, ATP assay'	'Human cells'	-3.63184	'Zhang et al. ACS Nano 2012, 6, 5, 4349–4368'
'Cr2O3'	152	193	'24 h'	'MTS assay'	'EC50'	338.844	0.00222924	'BEAS-2B cells, MTS assay'	'Human cells'	-2.65184	'Zhang et al. ACS Nano 2012, 6, 5, 4349–4368'
'Cr2O3'	152	NaN	'48 h'	'Acute toxicity assay'	'LC50'	1600	0.0105263	'Danio rerio (adults)'	'Fish'	-1.97772	'Kovrižnychet al. Interdisciplinary Toxicology. 2013; Vol. 6(2): 67–73'
'Cr2O3'	152	NaN	'48 h'	'Acute toxicity assay'	'LC50'	1600	0.0105263	'Danio rerio (eggs)'	'Fish'	-1.97772	'Kovrižnychet al. Interdisciplinary Toxicology. 2013; Vol. 6(2): 67–73'
'Cr2O3'	152	193	'24 h'	'growth inhibition assay'	'IC50'	232	0.00152632	'E.coli'	'Bacteria'	-2.81636	'Kaweeteerawat et al. Environ. Sci. Technol. 2015, 49, 1105−1112'
'Cr2O3'	152	NaN	'2 h'	'Cell viability assay CFU'	'EC50'	469.725	0.0030903	'E.coli'	'Bacteria'	-2.51	'Puzyn et al. Nature Nanotech 6, 175–178 (2011)'
'Cr2o3'	152	NaN	'12 h'	'MTT assay'	'EC50'	50	0.00131579	'Neuro 2A cells'	'Mammalian cells'	-2.88081	'Jeng et al. ron Sci Health A Tox Hazard Subst Environ Eng. 2006;41(12):2699-711'
'Cr2O3'	152	193	'24 h'	'ATP assay'	'EC50'	11.749	7.72959e-05	'RAW 2647 cells, ATP assay'	'Mammalian cells'	-4.11184	'Zhang et al. ACS Nano 2012, 6, 5, 4349–4368'
'Cr2O3'	152	193	'24 h'	'MTS assay'	'EC50'	467.735	0.0030772	'RAW 2647 cells, MTS assay'	'Mammalian cells'	-2.51184	'Zhang et al. ACS Nano 2012, 6, 5, 4349–4368'
'Cu'	64	22.9	'24 h'	'MTT assay'	'IC50'	13.49	0.000210781	'a549'	'Human cells'	-3.67617	'Lanone et al. Particle and Fibre Toxicology 2009, 6:14'
'Cu'	64	22.9	'24 h'	'MTT assay'	'IC50'	17.04	0.00026625	'a549'	'Human cells'	-3.57471	'Lanone et al. Particle and Fibre Toxicology 2009, 6:14'
'Cu'	64	22.9	'24 h'	'Neutral Red assay.'	'IC50'	1698	0.0265312	'a549'	'Human cells'	-1.57624	'Lanone et al. Particle and Fibre Toxicology 2009, 6:17'
'Cu'	64	22.9	'24 h'	'Neutral Red assay.'	'IC50'	70.79	0.00110609	'a549'	'Human cells'	-2.95621	'Lanone et al. Particle and Fibre Toxicology 2009, 6:18'
'Cu'	64	90	'24 h'	'MTT assay'	'IC50'	48.13	0.000752031	'a549'	'Human cells'	-3.12376	'Lanone et al. Particle and Fibre Toxicology 2009, 6:14'
'Cu'	64	90	'24 h'	'Neutral Red assay.'	'IC50'	74.95	0.00117109	'a549'	'Human cells'	-2.93141	'Lanone et al. Particle and Fibre Toxicology 2009, 6:15'
'Cu'	64	90	'24 h'	'Neutral Red assay.'	'IC50'	31.27	0.000488594	'a549'	'Human cells'	-3.31105	'Lanone et al. Particle and Fibre Toxicology 2009, 6:16'
'Cu'	64	26.7	'48 h'	'static renewal assay'	'LC50'	0.419	6.54687e-06	'Ceriodaphnia dubia (neonates)'	'Crustacean'	-5.18397	'Griffit et al. Environm. Toxicol. Chem. 2008; 27 (9) 1972–1978'
'Cu'	64	26.7	'48 h'	'static renewal assay'	'LC50'	0.94	1.46875e-05	'Danio rerio (adults)'	'Fish'	-4.83305	'Griffit et al. Environm. Toxicol. Chem. 2008; 27 (9) 1972–1978'
'Cu'	64	NaN	'48 h'	'Acute toxicity assay'	'LC50'	24	0.000375	'Danio rerio (eggs)'	'Fish'	-3.42597	'Kovrižnychet al. Interdisciplinary Toxicology. 2013; Vol. 6(2): 67–73'
'Cu'	64	26.7	'48 h'	'static renewal assay'	'LC50'	0.71	1.10938e-05	'Danio rerio (juvenile)'	'Fish'	-4.95492	'Griffit et al. Environm. Toxicol. Chem. 2008; 27 (9) 1972–1978'
'Cu'	64	26.7	'48 h'	'static renewal assay'	'LC50'	0.06	9.375e-07	'Daphnia pulex (adults)'	'Crustacean'	-6.02803	'Griffit et al. Environm. Toxicol. Chem. 2008; 27 (9) 1972–1978'
'Cu'	64	NaN	'24 h'	'Cell viability (MTT assay)'	'EC50'	85.5	0.00133594	'HeLa cells'	'Human cells'	-2.87421	'Kim et al. Bull. Korean Chem. Soc. 2012, Vol. 33, No. 10'
'Cu'	64	25	'96 h'	'growth inhibition assay'	'EC50'	0.3	4.6875e-06	'Soil bacterial community'	'Bacteria'	-5.32906	'Y. Zhai et al. Ecotoxicology and Environmental Safety 145 (2017) 349–361'
'Cu'	64	50	'96 h'	'growth inhibition assay'	'EC50'	0.38	5.9375e-06	'Soil bacterial community'	'Bacteria'	-5.2264	'Y. Zhai et al. Ecotoxicology and Environmental Safety 145 (2017) 349–362'
'Cu'	64	78	'96 h'	'growth inhibition assay'	'EC50'	0.57	8.90625e-06	'Soil bacterial community'	'Bacteria'	-5.05031	'Y. Zhai et al. Ecotoxicology and Environmental Safety 145 (2017) 349–363'
'Cu'	64	100	'96 h'	'growth inhibition assay'	'EC50'	0.54	8.4375e-06	'Soil bacterial community'	'Bacteria'	-5.07379	'Y. Zhai et al. Ecotoxicology and Environmental Safety 145 (2017) 349–364'
'Cu'	64	22.9	'24 h'	'MTT assay'	'IC50'	6.46	0.000100937	'THP-1'	'Human cells'	-3.99595	'Lanone et al. Particle and Fibre Toxicology 2009, 6:14'
'Cu'	64	22.9	'24 h'	'Neutral Red assay.'	'IC50'	13.15	0.000205469	'THP-1'	'Human cells'	-3.68725	'Lanone et al. Particle and Fibre Toxicology 2009, 6:29'
'Cu'	64	90	'24 h'	'MTT assay'	'IC50'	5.29	8.26563e-05	'THP-1'	'Human cells'	-4.08272	'Lanone et al. Particle and Fibre Toxicology 2009, 6:14'
'Cu'	64	90	'24 h'	'MTT assay'	'IC50'	6.59	0.000102969	'THP-1'	'Human cells'	-3.98729	'Lanone et al. Particle and Fibre Toxicology 2009, 6:14'
'Cu'	64	90	'24 h'	'Neutral Red assay.'	'IC50'	5.7	8.90625e-05	'THP-1'	'Human cells'	-4.05031	'Lanone et al. Particle and Fibre Toxicology 2009, 6:29'
'Cu'	64	40	'15 min'	'bioluminescence inhibition assay'	'EC50'	4.1	6.40625e-05	'Vibrio Fischeri'	'Bacteria'	-4.1934	'Zhang et al. Environ Monit Assess (2020) 192: 484'
'Cu2O'	143	NaN	'24 h'	'MTT assay'	'IC50'	45	0.000314685	'a549'	'Human cells'	-3.50212	'Lanone et al. Particle and Fibre Toxicology 2009, 6:14'
'Cu2O'	143	NaN	'24 h'	'MTT assay'	'IC50'	52.52	0.000367273	'a549'	'Human cells'	-3.43501	'Lanone et al. Particle and Fibre Toxicology 2009, 6:14'
'Cu2O'	143	NaN	'24 h'	'Neutral Red assay.'	'IC50'	164.7	0.00115175	'a549'	'Human cells'	-2.93864	'Lanone et al. Particle and Fibre Toxicology 2009, 6:20'
'Cu2O'	143	NaN	'24 h'	'MTT assay'	'IC50'	3.42	2.39161e-05	'THP-1'	'Human cells'	-4.62131	'Lanone et al. Particle and Fibre Toxicology 2009, 6:14'
'Cu2O'	143	NaN	'24 h'	'MTT assay'	'IC50'	11.53	8.06294e-05	'THP-1'	'Human cells'	-4.09351	'Lanone et al. Particle and Fibre Toxicology 2009, 6:14'
'Cu2O'	143	NaN	'24 h'	'Neutral Red assay.'	'IC50'	2.93	2.04895e-05	'THP-1'	'Human cells'	-4.68847	'Lanone et al. Particle and Fibre Toxicology 2009, 6:29'
'CuO'	79.545	11.9	'24 h'	'NRU assay'	'IC50'	18.9	0.000237601	'A549'	'Human cells'	-3.62415	'Ivansk et al. Curr Top Med Chem., 2015;15(18):1914-29'
'CuO'	79.545	30	'24 h'	'MTT assay'	'IC50'	10.07	0.000126595	'a549'	'Human cells'	-3.89758	'Lanone et al. Particle and Fibre Toxicology 2009, 6:14'
'CuO'	79.545	30	'24 h'	'MTT assay'	'IC50'	10.82	0.000136024	'a549'	'Human cells'	-3.86639	'Lanone et al. Particle and Fibre Toxicology 2009, 6:14'
'CuO'	79.545	45.4	'24 h'	'MTT assay'	'IC50'	35.61	0.000447671	'a549'	'Human cells'	-3.34904	'Lanone et al. Particle and Fibre Toxicology 2009, 6:14'
'CuO'	79.545	45.4	'24 h'	'MTT assay'	'IC50'	47.41	0.000596015	'a549'	'Human cells'	-3.22474	'Lanone et al. Particle and Fibre Toxicology 2009, 6:14'
'CuO'	79.545	45.4	'24 h'	'Neutral Red assay.'	'IC50'	832.7	0.0104683	'a549'	'Human cells'	-1.98012	'Lanone et al. Particle and Fibre Toxicology 2009, 6:21'
'CuO'	79.545	45.4	'24 h'	'Neutral Red assay.'	'IC50'	102.5	0.00128858	'a549'	'Human cells'	-2.88989	'Lanone et al. Particle and Fibre Toxicology 2009, 6:22'
'CuO'	79.545	NaN	'36 h'	'resazurin fluorescence assay'	'ec50'	32.1	0.000403545	'A549'	'Human cells'	-3.39411	'Titma et al. Cytotechnology. 2016;68(6):2363-2377'
'CuO'	79.545	NaN	'108'	'resazurin fluorescence assay'	'ec50'	36.2	0.000455088	'A549'	'Human cells'	-3.3419	'Titma et al. Cytotechnology. 2016;68(6):2363-2377'
'CuO'	79.545	NaN	'216'	'resazurin fluorescence assay'	'ec50'	37.2	0.00046766	'A549'	'Human cells'	-3.33007	'Titma et al. Cytotechnology. 2016;68(6):2363-2377'
'CuO'	79.545	NaN	'60 h'	'resazurin fluorescence assay'	'ec50'	37.4	0.000470174	'A549'	'Human cells'	-3.32774	'Titma et al. Cytotechnology. 2016;68(6):2363-2377'
'CuO'	79.545	NaN	'12 h'	'resazurin fluorescence assay'	'ec50'	38.2	0.000480231	'A549'	'Human cells'	-3.31855	'Titma et al. Cytotechnology. 2016;68(6):2363-2377'
'CuO'	79.545	NaN	'24 h'	'resazurin fluorescence assay'	'ec50'	43.8	0.000550632	'A549'	'Human cells'	-3.25914	'Titma et al. Cytotechnology. 2016;68(6):2363-2377'
'CuO'	79.545	NaN	'24 h'	'aBlue'	'IC50'	30	0.000377145	'A549'	'Human cells'	-3.42349	'Seiffert et al., 2012,Chem. Res. Toxicol., 25, 140–152'
'CuO'	79.545	NaN	'24 h'	'Impedance'	'IC50'	30	0.000377145	'A549'	'Human cells'	-3.42349	'Seiffert et al., 2012,Chem. Res. Toxicol., 25, 140–152'
'CuO'	79.545	NaN	'24 h'	'MTT'	'IC50'	30	0.000377145	'A549'	'Human cells'	-3.42349	'Seiffert et al., 2012,Chem. Res. Toxicol., 25, 140–152'
'CuO'	79.545	NaN	'24 h'	'NRU assay'	'IC50'	30	0.000377145	'A549'	'Human cells'	-3.42349	'Seiffert et al., 2012,Chem. Res. Toxicol., 25, 140–152'
'CuO'	79.545	NaN	'24 h'	'WST-1'	'IC50'	30	0.000377145	'A549'	'Human cells'	-3.42349	'Seiffert et al., 2012,Chem. Res. Toxicol., 25, 140–152'
'CuO'	80	50.24	'24 h'	'Cytotoxicity (MTS)'	'ec50 (in SCM medium)'	50	0.000625	'A549 cells'	'Human cells'	-3.20412	'Areecheewakul, et al. NanoImpact 18 (2020) 100214'
'CuO'	80	50.24	'24 h'	'Cytotoxicity (PI staining)'	'ec50 (in SCM medium)'	7.5	9.375e-05	'A549 cells'	'Human cells'	-4.02803	'Areecheewakul, et al. NanoImpact 18 (2020) 100214'
'CuO'	80	50.24	'24 h'	'Cytotoxicity (PI staining)'	'ec50 (in SFM medium)'	75	0.0009375	'A549 cells'	'Human cells'	-3.02803	'Areecheewakul, et al. NanoImpact 18 (2020) 100214'
'CuO'	79.545	NaN	'24 h'	'resazurin fluorescence assay'	'ec50'	11	0.000138287	'Balb/c 3T3'	'Mammalian cells'	-3.85922	'Titma et al. Cytotechnology. 2016;68(6):2363-2377'
'CuO'	79.545	NaN	'24 h'	'Cell viability'	'EC50'	5	6.28575e-05	'BEAS-2B'	'Human cells'	-4.20164	'Huang et al. Materials 2010, 3, 4842-4859;'
'CuO'	79.545	12.8	'24 h'	'ATP assay'	'EC50'	23.9883	0.000301569	'BEAS-2B cells, ATP assay'	'Human cells'	-3.52061	'Zhang et al. ACS Nano 2012, 6, 5, 4349–4368'
'CuO'	79.545	12.8	'24 h'	'MTS assay'	'EC50'	23.9883	0.000301569	'BEAS-2B cells, MTS assay'	'Human cells'	-3.52061	'Zhang et al. ACS Nano 2012, 6, 5, 4349–4368'
'CuO'	79.545	11.9	'24 h'	'NRU assay'	'IC50'	12.6	0.000158401	'Caco2'	'Human cells'	-3.80024	'Ivansk et al. Curr Top Med Chem., 2015;15(18):1914-29'
'CuO'	79.545	NaN	'60 h'	'resazurin fluorescence assay'	'ec50'	30.3	0.000380916	'Caco2'	'Human cells'	-3.41917	'Titma et al. Cytotechnology. 2016;68(6):2363-2377'
'CuO'	79.545	NaN	'108'	'resazurin fluorescence assay'	'ec50'	31.5	0.000396002	'Caco2'	'Human cells'	-3.4023	'Titma et al. Cytotechnology. 2016;68(6):2363-2377'
'CuO'	79.545	NaN	'216'	'resazurin fluorescence assay'	'ec50'	37	0.000465146	'Caco2'	'Human cells'	-3.33241	'Titma et al. Cytotechnology. 2016;68(6):2363-2377'
'CuO'	79.545	NaN	'24 h'	'resazurin fluorescence assay'	'ec50'	117.2	0.00147338	'Caco2'	'Human cells'	-2.83169	'Titma et al. Cytotechnology. 2016;68(6):2363-2377'
'CuO'	79.545	NaN	'3 days'	'Phytotoxicity (root length)'	'EC50'	175.4	0.00220504	'Cucumis sativus'	'Plant'	-2.65658	'Wu et al. J Pet Environ Biotechnol, 2012, 3:126'
'CuO'	79.545	NaN	'48 h'	'Acute toxicity assay'	'LC50'	12.5	0.000157144	'Danio rerio (adults)'	'Fish'	-3.8037	'Kovrižnychet al. Interdisciplinary Toxicology. 2013; Vol. 6(2): 67–73'
'CuO'	79.545	NaN	'48 h'	'Acute toxicity assay'	'LC50'	960	0.0120686	'Danio rerio (eggs)'	'Fish'	-1.91834	'Kovrižnychet al. Interdisciplinary Toxicology. 2013; Vol. 6(2): 67–73'
'CuO'	79.545	30	'48 h'	'acute immobilisation assay (Daphtoxkit)'	'EC50'	149	0.00187315	'daphnia magna'	'Crustacean'	-2.72743	'Blinova et al. / Environmental Pollution 158 (2010) 41–4744'
'CuO'	79.545	30	'48 h'	'acute immobilisation assay (Daphtoxkit)'	'EC50'	160	0.00201144	'daphnia magna'	'Crustacean'	-2.69649	'Blinova et al. / Environmental Pollution 158 (2010) 41–4744'
'CuO'	79.545	30	'48 h'	'acute immobilisation assay (Daphtoxkit)'	'EC50'	200	0.0025143	'daphnia magna'	'Crustacean'	-2.59958	'Blinova et al. / Environmental Pollution 158 (2010) 41–4744'
'CuO'	79.545	30	'48 h'	'acute immobilisation assay (Daphtoxkit)'	'EC50'	224	0.00281602	'daphnia magna'	'Crustacean'	-2.55036	'Blinova et al. / Environmental Pollution 158 (2010) 41–4744'
'CuO'	79.545	NaN	'48 h'	'Immobilization'	'EC50'	5.903	7.42096e-05	'Daphnia magna'	'Crustacean'	-4.12954	'Sovova et al., 2009, Proceedings,NANOCON Conference, Roznov , Czech Republic, pp 62‐71,'
'CuO'	80	30	'48 h'	'Mortality test assay'	'LC50'	3.2	4e-05	'Daphnia magna (neonates)'	'Crustacean'	-4.39794	'Heinlaan et al. Chemosphere 2008; 71 (7) 1308-1316'
'CuO'	79.545	30	'30 min'	'luminescence inhbition'	'ec50'	50.5	0.000634861	'E. coli AB1157'	'Bacteria'	-3.19732	'Ivansk et al Anal Bioanal Chem (2010) 398:701–716'
'CuO'	79.545	30	'2 h'	'luminescence inhbition'	'ec50'	2.53	3.18059e-05	'E. coli AS391'	'Bacteria'	-4.49749	'Ivansk et al Anal Bioanal Chem (2010) 398:701–716'
'CuO'	79.545	30	'2 h'	'luminescence inhbition'	'ec50'	9.85	0.000123829	'E. coli AS393'	'Bacteria'	-3.90718	'Ivansk et al Anal Bioanal Chem (2010) 398:701–716'
'CuO'	79.545	30	'30 min'	'luminescence inhbition'	'ec50'	47.6	0.000598403	'E. coli AS393'	'Bacteria'	-3.22301	'Ivansk et al Anal Bioanal Chem (2010) 398:701–716'
'CuO'	79.545	30	'2 h'	'luminescence inhbition'	'ec50'	6.73	8.46062e-05	'E. coli JI130'	'Bacteria'	-4.0726	'Ivansk et al Anal Bioanal Chem (2010) 398:701–716'
'CuO'	79.545	30	'30 min'	'luminescence inhbition'	'ec50'	39.7	0.000499089	'E. coli JI130'	'Bacteria'	-3.30182	'Ivansk et al Anal Bioanal Chem (2010) 398:701–716'
'CuO'	79.545	30	'30 min'	'luminescence inhbition'	'ec50'	33	0.00041486	'E. coli JI131'	'Bacteria'	-3.3821	'Ivansk et al Anal Bioanal Chem (2010) 398:701–716'
'CuO'	79.545	30	'30 min'	'luminescence inhbition'	'ec50'	14.8	0.000186058	'E. coli JI132'	'Bacteria'	-3.73035	'Ivansk et al Anal Bioanal Chem (2010) 398:701–716'
'CuO'	79.545	12.8	'24 h'	'growth inhibition assay'	'IC50'	39	0.000490289	'E.coli'	'Bacteria'	-3.30955	'Kaweeteerawat et al. Environ. Sci. Technol. 2015, 49, 1105−1112'
'CuO'	79.545	28	'30 min'	'Cell viability assay CFU'	'LC50'	4.57734	5.7544e-05	'E.coli'	'Bacteria'	-4.24	'Pathakoti et al. Journal of Photochemistry and Photobiology B: Biology 130 (2014) 234–240'
'CuO'	79.545	NaN	'2 h'	'Cell viability assay CFU'	'EC50'	50.1895	0.000630957	'E.coli'	'Bacteria'	-3.2	'Puzyn et al. Nature Nanotech 6, 175–178 (2011)'
'CuO'	79.545	NaN	'1.5 h'	'bioluminescence activity assay'	'EC50'	54.01	0.000678987	'E.coli'	'Bacteria'	-3.16814	'Ko et al. Appl Microbiol Biotechnol (2014) 98:3295–3303'
'CuO'	79.545	28	'30 min'	'Cytotoxicity assays'	'LC50'	4.63	5.8206e-05	'Escherichia Coli'	'Bacteria'	-4.23503	'Dasari et al. J Environ Sci, 2013;25(5):882-8'
'CuO'	79.545	48	'24 h'	'MTT assay'	'ec50'	100	0.00125715	'Hacat'	'Human cells'	-2.90061	'Horie et al. Metallomics, 2012, 4, 350–360'
'CuO'	79.545	24.5	'24 h'	'Membrane integrity'	'ec50'	2.2	2.76573e-05	'human mesenchymal stem cells'	'Human cells'	-4.55819	'Bondarenko et al. Nanotoxicology, 2016; 10(9): 1229–1242'
'CuO'	79.545	NaN	'3 days'	'Phytotoxicity (root length)'	'EC50'	12.9	0.000162172	'Lactuca sativa'	'Plants'	-3.79002	'Wu et al. J Pet Environ Biotechnol, 2012, 3:126'
'CuO'	80	NaN	'4 days'	'growth inhibition assay'	'EC50'	0.25	3.125e-06	'Lactuca sativa L.'	'Plants'	-5.50515	'Kong et al. Nanomaterials 2021, 11, 1653'
'CuO'	79.545	24.5	'48 h'	'Membrane integrity'	'ec50'	1	1.25715e-05	'murine Fibroblasts (membrane integrity)'	'Mammalian cells'	-4.90061	'Bondarenko et al. Nanotoxicology, 2016; 10(9): 1229–1242'
'CuO'	79.545	13.3	'48 h'	'Static acute toxicity'	'LC50'	0.98	1.23201e-05	'P. multimicronucleatum'	'Eukaryotes & Microalgae'	-4.90939	'Li et al. 2012, Chem. Res. Toxicol, 25, 1675−1681'
'CuO'	79.545	NaN	'3 days'	'Seed germination'	'EC50'	26.84	0.000337419	'Raphanus sativus L'	'Plants'	-3.47183	'Ko et al. Appl Microbiol Biotechnol (2014) 98:3295–3303'
'CuO'	79.545	12.8	'24 h'	'ATP assay'	'EC50'	14.4544	0.000181713	'RAW 2647 cells, ATP assay'	'Mammalian cells'	-3.74061	'Zhang et al. ACS Nano 2012, 6, 5, 4349–4368'
'CuO'	79.545	12.8	'24 h'	'MTS assay'	'EC50'	13.1826	0.000165725	'RAW 2647 cells, MTS assay'	'Mammalian cells'	-3.78061	'Zhang et al. ACS Nano 2012, 6, 5, 4349–4368'
'CuO'	80	30	'8 h'	'Cell Viability CFU assay'	'EC50'	20.7	0.00025875	'Saccharomyces cerevisiae S288C'	'Eukaryotes & Microalgae'	-3.58712	'Kasemets et al. Toxicol. In Vitro 2009; 23 (6) 1116-1122'
'CuO'	80	13.1	'24 h'	'Viability assay'	'EC50'	2	2.5e-05	'Tetrahymena thermophila'	'Eukaryotes & Microalgae'	-4.60206	'Aruoja et al Environ. Sci.: Nano, 2015,2, 630-644'
'CuO'	79.545	30	'24 h'	'acute mortality test(Thamnotoxkit)'	'LC50'	152	0.00191087	'Thamnocephalus platyurus'	'Crustacean'	-2.71877	'Blinova et al. / Environmental Pollution 158 (2010) 41–4744'
'CuO'	79.545	30	'24 h'	'acute mortality test(Thamnotoxkit)'	'LC50'	217	0.00272802	'Thamnocephalus platyurus'	'Crustacean'	-2.56415	'Blinova et al. / Environmental Pollution 158 (2010) 41–4744'
'CuO'	79.545	30	'24 h'	'acute mortality test(Thamnotoxkit)'	'LC50'	92.7	0.00116538	'Thamnocephalus platyurus'	'Crustacean'	-2.93353	'Blinova et al. / Environmental Pollution 158 (2010) 41–4744'
'CuO'	79.545	30	'24 h'	'acute mortality test(Thamnotoxkit)'	'LC50'	112	0.00140801	'Thamnocephalus platyurus'	'Crustacean'	-2.85139	'Blinova et al. / Environmental Pollution 158 (2010) 41–4744'
'CuO'	79.545	30	'24 h'	'acute mortality test(Thamnotoxkit)'	'LC50'	129	0.00162172	'Thamnocephalus platyurus'	'Crustacean'	-2.79002	'Blinova et al. / Environmental Pollution 158 (2010) 41–4744'
'CuO'	79.545	30	'24 h'	'acute mortality test(Thamnotoxkit)'	'LC50'	90.3	0.00113521	'Thamnocephalus platyurus'	'Crustacean'	-2.94493	'Blinova et al. / Environmental Pollution 158 (2010) 41–4744'
'CuO'	80	30	'24 h'	'Mortality test assay'	'LC50'	2.1	2.625e-05	'Thamnocephalus platyurus'	'Crustacean'	-4.58087	'Heinlaan et al. Chemosphere 2008; 71 (7) 1308-1316'
'CuO'	79.545	30	'24 h'	'MTT assay'	'IC50'	3	3.77145e-05	'THP-1'	'Human cells'	-4.42349	'Lanone et al. Particle and Fibre Toxicology 2009, 6:14'
'CuO'	79.545	30	'24 h'	'MTT assay'	'IC50'	7.3	9.1772e-05	'THP-1'	'Human cells'	-4.03729	'Lanone et al. Particle and Fibre Toxicology 2009, 6:14'
'CuO'	79.545	30	'24 h'	'Neutral Red assay.'	'IC50'	17.88	0.000224778	'THP-1'	'Human cells'	-3.64825	'Lanone et al. Particle and Fibre Toxicology 2009, 6:29'
'CuO'	79.545	45.4	'24 h'	'MTT assay'	'IC50'	3.89	4.89031e-05	'THP-1'	'Human cells'	-4.31066	'Lanone et al. Particle and Fibre Toxicology 2009, 6:14'
'CuO'	79.545	45.4	'24 h'	'MTT assay'	'IC50'	31.07	0.000390597	'THP-1'	'Human cells'	-3.40827	'Lanone et al. Particle and Fibre Toxicology 2009, 6:14'
'CuO'	79.545	45.4	'24 h'	'Neutral Red assay.'	'IC50'	12.38	0.000155635	'THP-1'	'Human cells'	-3.80789	'Lanone et al. Particle and Fibre Toxicology 2009, 6:29'
'CuO'	80	28.5	'24 h'	'MTS assay'	'EC50'	14.4	0.00018	'THP-1 CELLS'	'Human cells'	-3.74473	'Jeong et al. Front Pharmacol. 2018 22;9:15.'
'CuO'	80	13.1	'30 min'	'luminescence inhbition'	'EC50'	1.78	2.225e-05	'Vibrio Fischeri'	'Bacteria'	-4.65267	'Aruoja et al Environ. Sci.: Nano, 2015,2, 630-644'
'CuO'	79.545	24.5	'30 min'	'bioluminescence inhibition assay'	'ec50'	3.4	4.27431e-05	'Vibrio fischeri'	'Bacteria'	-4.36913	'Bondarenko et al. Nanotoxicology, 2016; 10(9): 1229–1242'
'CuO'	80	30	'30 min'	'bioluminescence inhibition assay'	'EC50'	79	0.0009875	'Vibrio fischeri'	'Bacteria'	-3.00546	'Heinlaan et al. Chemosphere 2008; 71 (7) 1308-1316'
'CuO'	79.545	40	'15 min'	'bioluminescence inhibition assay'	'EC50'	118.7	0.00149224	'Vibrio Fischeri'	'Bacteria'	-2.82616	'Zhang et al. Environ Monit Assess (2020) 192: 484'
'CuO'	79.545	NaN	'30 min'	'bioluminescence inhibition assay'	'EC50'	12.2	0.000153372	'Vibrio fischeri'	'Bacteria'	-3.81425	'Sovova et al., 2009, Proceedings,NANOCON Conference, Roznov , Czech Republic, pp 62‐71,'
'CuO'	79.545	30	'30 min'	'bioluminescence inhibition assay'	'ec50'	68.1	0.000856119	'Vibrio fischieri'	'Bacteria'	-3.06747	'Mortimer et al. Toxicology in Vitro 22 (2008) 1412–1417'
'CuO'	80	20	'6 h'	'Cytotoxicity assay'	'EC50'	11.38	0.00014225	'Saccharomyces cerevisae'	'Eukaryotes & Microalgae'	-3.84695	'Zhang et al., J Nanopart Res (2016) 18 (2), 372'
'CuO'	80	20	'48 h'	'Cytotoxicity assay'	'EC50'	1.07	1.3375e-05	'Saccharomyces cerevisae'	'Eukaryotes & Microalgae'	-4.87371	'Zhang et al., J Nanopart Res (2016) 18 (2), 372'
'Er2O3'	382.5	NaN	'2 h'	'Cell Viability CFU assay'	'ec50'	0.033	8.62745e-08	'E Coli'	'Bacteria'	-7.06412	'Kar et al. Chemosphere 264 (2021) 128428'
'Fe2O3'	160	39	'24 h'	'MTT assay'	'ec50'	1000	0.00625	'A549'	'Human cells'	-2.20412	'Horie et al. Metallomics, 2012, 4, 350–360'
'Fe2O3'	160	NaN	'24 h'	'Cellular proliferation colorimetric assay'	'LD 50'	1000	0.00625	'A549'	'Human cells'	-2.20412	'Lozano et al 2011 J. Phys.: Conf. Ser. 304 012046'
'Fe2O3'	160	NaN	'48 h'	'Cellular proliferation colorimetric assay'	'LD 50'	1000	0.00625	'A549'	'Human cells'	-2.20412	'Lozano et al 2011 J. Phys.: Conf. Ser. 304 012046'
'Fe2O3'	160	20.93	'24 h'	'CCK-8 cytotoxicity assay'	'EC50'	651.808	0.0040738	'A549 cells'	'Human cells'	-2.39	'Cao et al. Green Chem., 2020,22, 3512-3521'
'Fe2O3'	160	12.3	'24 h'	'ATP assay'	'EC50'	NaN	NaN	'BEAS-2B cells, ATP assay'	'Human cells'	NaN	'Zhang et al. ACS Nano 2012, 6, 5, 4349–4368'
'Fe2O3'	160	NaN	'3 days'	'Phytotoxicity (root length)'	'EC50'	1682	0.0105125	'Cucumis sativus'	'Plant'	-1.97829	'Wu et al. J Pet Environ Biotechnol, 2012, 3:126'
'Fe2O3'	160	NaN	'48 h'	'Acute toxicity assay'	'LC50'	1600	0.01	'Danio rerio (eggs)'	'Fish'	-2	'Kovrižnychet al. Interdisciplinary Toxicology. 2013; Vol. 6(2): 67–73'
'Fe2O3'	160	NaN	'2 h'	'Cell viability assay CFU'	'EC50'	820.578	0.00512861	'E.coli'	'Bacteria'	-2.29	'Puzyn et al. Nature Nanotech 6, 175–178 (2011)'
'Fe2O3'	160	NaN	'1.5 h'	'bioluminescence activity assay'	'EC50'	1000	0.00625	'E.coli'	'Bacteria'	-2.20412	'Ko et al. Appl Microbiol Biotechnol (2014) 98:3295–3303'
'Fe2O3'	160	NaN	'2 h'	'Cytotoxicity assay'	'LD50'	638.3	0.00398937	'E.coli'	'Bacteria'	-2.3991	'Hu et al. Sci. Total Environ. 407 (2009) 3070–3072'
'Fe2O3'	160	39	'24 h'	'MTT assay'	'ec50'	1000	0.00625	'Hacat'	'Human cells'	-2.20412	'Horie et al. Metallomics, 2012, 4, 350–360'
'Fe2O3'	160	100	'24 h'	'WST-1 assay'	'IC50'	698	0.0043625	'HEK293'	'Human cells'	-2.36026	'Dua et al., 2011,Bull. Korean Chem. Soc. Vol. 32, No. 6 2051'
'Fe2O3'	160	NaN	'24 h'	'Cellular proliferation colorimetric assay'	'LD 50'	1000	0.00625	'HeLa cells'	'Human cells'	-2.20412	'Lozano et al 2011 J. Phys.: Conf. Ser. 304 012046'
'Fe2O3'	160	NaN	'48 h'	'Cellular proliferation colorimetric assay'	'LD 50'	1000	0.00625	'HeLa cells'	'Human cells'	-2.20412	'Lozano et al 2011 J. Phys.: Conf. Ser. 304 012046'
'Fe2O3'	160	NaN	'3 days'	'Phytotoxicity (root length)'	'EC50'	5000	0.03125	'Lactuca sativa'	'Plants'	-1.50515	'Wu et al. J Pet Environ Biotechnol, 2012, 3:126'
'Fe2O3'	160	NaN	'3 days'	'Seed germination'	'EC50'	1000	0.00625	'Lactuca sativa L.'	'Plants'	-2.20412	'Ko et al. Appl Microbiol Biotechnol (2014) 98:3295–3303'
'Fe2O3'	160	NaN	'24 h'	'Cellular proliferation colorimetric assay'	'LD 50'	1000	0.00625	'NCl H460'	'Human cells'	-2.20412	'Lozano et al 2011 J. Phys.: Conf. Ser. 304 012046'
'Fe2O3'	160	4.7	'48 h'	'Static acute toxicity'	'LC50'	0.81	5.0625e-06	'P. multimicronucleatum'	'Eukaryotes & Microalgae'	-5.29563	'Li et al. 2012, Chem. Res. Toxicol, 25, 1675−1681'
'Fe2O3'	160	12.3	'24 h'	'ATP assay'	'EC50'	NaN	NaN	'RAW 2647 cells, ATP assay'	'Mammalian cells'	NaN	'Zhang et al. ACS Nano 2012, 6, 5, 4349–4368'
'Fe2O3'	160	12.3	'24 h'	'MTS assay'	'EC50'	NaN	NaN	'RAW 2647 cells, MTS assay'	'Mammalian cells'	NaN	'Zhang et al. ACS Nano 2012, 6, 5, 4349–4368'
'Fe2O3'	160	NaN	'48 h'	'Cellular proliferation colorimetric assay'	'LD 50'	1000	0.00625	'SK- MES 1'	'Human cells'	-2.20412	'Lozano et al 2011 J. Phys.: Conf. Ser. 304 012046'
'Fe2O3'	160	NaN	'10 h'	'Activity inhibition'	'IC50'	1000	0.00625	'Saccharomyces cerevisae'	'Eukaryotes & Microalgae'	-2.20412	'Otero-González et al. / Chemosphere 93 (2013) 1201–1206'
'Fe2O3'	160	NaN	'10 h'	'Activity inhibition'	'IC50'	1000	0.00625	'Saccharomyces cerevisae'	'Eukaryotes & Microalgae'	-2.20412	'Otero-González et al. / Chemosphere 93 (2013) 1201–1206'
'Fe2O3'	160	NaN	'10 h'	'FungaLight kit, membrane damage assay'	'EC50'	1000	0.00625	'Saccharomyces cerevisae'	'Eukaryotes & Microalgae'	-2.20412	'Otero-González et al. / Chemosphere 93 (2013) 1201–1206'
'Fe3O4'	232	NaN	'2 h'	'Cell Viability CFU assay'	'ec50'	2000	0.00862069	'E Coli'	'Bacteria'	-2.06446	'Kar et al. Chemosphere 264 (2021) 128428'
'Fe3O4'	232	12	'24 h'	'growth inhibition assay'	'IC50'	NaN	NaN	'E.coli'	'Bacteria'	NaN	'Kaweeteerawat et al. Environ. Sci. Technol. 2015, 49, 1105−1112'
'Fe3o4'	232	6	'24 H'	'CCK-8'	'EC50'	NaN	NaN	'Hep 3B'	'Human cells'	NaN	'Xie et al. International journal of Nanomedicine, 11, 2016, 3557—3570'
'Fe3o4'	232	9	'24 H'	'CCK-8'	'EC50'	NaN	NaN	'Hep 3B'	'Human cells'	NaN	'Xie et al. International journal of Nanomedicine, 11, 2016, 3557—3570'
'Fe3o4'	232	14	'24 H'	'CCK-8'	'EC50'	NaN	NaN	'Hep 3B'	'Human cells'	NaN	'Xie et al. International journal of Nanomedicine, 11, 2016, 3557—3570'
'Fe3o4'	232	NaN	'48 h'	'MTT assay'	'IC50'	1000	0.00431034	'K562 cells'	'Human cells'	-2.36549	'Malekshah et al. ,2020, Drug Delivery, 27:1, 1201-1217'
'Fe3o4'	232	NaN	'12 h'	'PI strain assay'	'EC50'	1353	0.0058319	'Saccharomyces cerevisae'	'Eukaryotes & Microalgae'	-2.23419	'Peng et al., Chemico-Biological Interactions,287,2018, 20-26,'
'Fe3o4'	232	NaN	'12h'	'growth inhibition assay'	'IC50'	800	0.00344828	'Saccharomyces cerevisae'	'Eukaryotes & Microalgae'	-2.4624	'Peng et al., Chemico-Biological Interactions,287,2018, 20-26,'
'Fe3o4'	232	NaN	'12h'	'ATP assay'	'EC50'	800	0.00344828	'Saccharomyces cerevisae'	'Eukaryotes & Microalgae'	-2.4624	'Peng et al., Chemico-Biological Interactions,287,2018, 20-26,'
'Fe3o4'	232	9	'24 H'	'CCK-8'	'EC50'	NaN	NaN	'SK HEP 1'	'Human cells'	NaN	'Xie et al. International journal of Nanomedicine, 11, 2016, 3557—3570'
'Fe3o4'	232	14	'24 H'	'CCK-8'	'EC50'	NaN	NaN	'SK HEP 1'	'Human cells'	NaN	'Xie et al. International journal of Nanomedicine, 11, 2016, 3557—3570'
'Fe3O4'	232	9.7	'24 h'	'Viability assay'	'EC50'	26.03	0.000112198	'Tetrahymena thermophila'	'Eukaryotes & Microalgae'	-3.95001	'Aruoja et al Environ. Sci.: Nano, 2015,2, 630-644'
'Ga2O3'	187	654	'5 days'	'Microtox bioassay'	'ec50'	NaN	NaN	'Methanogenic archaea'	'Bacteria'	NaN	'Nguyen et al. Journal of Environmental Science and Health, 2020 Part A, 55:2, 168-178'
'Ga2O3'	187	654	'15 min'	'Microtox bioassay'	'ec50'	NaN	NaN	'Vibrio fischeri'	'Bacteria'	NaN	'Nguyen et al. Journal of Environmental Science and Health, 2020 Part A, 55:2, 168-178'
'Gd2O3'	362	NaN	'24 h'	'MTT assay'	'ec50'	NaN	NaN	'A549'	'Human cells'	NaN	'Horie et al. Metallomics, 2012, 4, 350–360'
'Gd2O3'	362	72.76	'24 h'	'CCK-8 cytotoxicity assay'	'EC50'	952.157	0.00263027	'A549 cells'	'Human cells'	-2.58	'Cao et al. Green Chem., 2020,22, 3512-3521'
'Gd2O3'	362	23.4	'2 h'	'growth inhibition assay'	'IC50'	20	5.52486e-05	'Brassica napus'	'Plant'	-4.25768	'Ma et al. Chemosphere 2010; 78 (3) 273-279'
'Gd2O3'	362	43.8	'24 h'	'growth inhibition assay'	'IC50'	NaN	NaN	'E.coli'	'Bacteria'	NaN	'Kaweeteerawat et al. Environ. Sci. Technol. 2015, 49, 1105−1112'
'Gd2O3'	362	NaN	'24 h'	'MTT assay'	'ec50'	NaN	NaN	'Hacat'	'Human cells'	NaN	'Horie et al. Metallomics, 2012, 4, 350–360'
'HfO2'	210	43.86	'24 h'	'CCK-8 cytotoxicity assay'	'EC50'	1236.57	0.00588844	'A549 cells'	'Human cells'	-2.23	'Cao et al. Green Chem., 2020,22, 3512-3521'
'HfO2'	210	28.4	'24 h'	'growth inhibition assay'	'IC50'	NaN	NaN	'E.coli'	'Bacteria'	NaN	'Kaweeteerawat et al. Environ. Sci. Technol. 2015, 49, 1105−1112'
'HfO2'	210	100	'10 h'	'Activity inhibition'	'IC50'	1000	0.0047619	'Saccharomyces cerevisae'	'Eukaryotes & Microalgae'	-2.32222	'García-Saucedo et al. / Journal of Hazardous Materials 192 (2011) 1572–1579'
'HfO2'	210	100	'10 h'	'Activity inhibition'	'IC50'	1000	0.0047619	'Saccharomyces cerevisae'	'Eukaryotes & Microalgae'	-2.32222	'García-Saucedo et al. / Journal of Hazardous Materials 192 (2011) 1572–1579'
'In2O3'	278	77.15	'24 h'	'CCK-8 cytotoxicity assay'	'EC50'	326.622	0.0011749	'A549 cells'	'Human cells'	-2.93	'Cao et al. Green Chem., 2020,22, 3512-3521'
'In2O3'	278	59.6	'24 h'	'growth inhibition assay'	'IC50'	NaN	NaN	'E.coli'	'Bacteria'	NaN	'Kaweeteerawat et al. Environ. Sci. Technol. 2015, 49, 1105−1112'
'In2O3'	278	NaN	'2 h'	'Cell viability assay CFU'	'EC50'	430.571	0.00154882	'E.coli'	'Bacteria'	-2.81	'Puzyn et al. Nature Nanotech 6, 175–178 (2011)'
'In2O3'	278	29.8	'24 h'	'CytoTox-Glo Cytotoxicity Assay'	'LC50'	332	0.00119424	'Hacat cells'	'Human cells'	-2.92291	'Gajewicz et al. Nanotoxicology, 2015;9(3):313-25'
'In2O3'	278	626	'5 days'	'Microtox bioassay'	'ec50'	NaN	NaN	'Methanogenic archaea'	'Bacteria'	NaN	'Nguyen et al. Journal of Environmental Science and Health, 2020 Part A, 55:2, 168-178'
'La2O3'	326	NaN	'24 h'	'MTT assay'	'ec50'	NaN	NaN	'A549'	'Human cells'	NaN	'Horie et al. Metallomics, 2012, 4, 350–360'
'La2O3'	326	103.6	'48h'	'Cytotoxicity assay'	'LD50'	50.58	0.000155153	'a549'	'Human cells'	-3.80924	'Lim et al.,Toxicol. Res.,(2015) Vol. 31, No. 2, pp. 181-189
'La2O3'	326	75.81	'24 h'	'CCK-8 cytotoxicity assay'	'EC50'	450.005	0.00138038	'A549 cells'	'Human cells'	-2.86	'Cao et al. Green Chem., 2020,22, 3512-3521'
'La2O3'	326	21.8	'2 h'	'growth inhibition assay'	'IC51'	40	0.000122699	'Brassica napus'	'Plant'	-3.91116	'Ma et al. Chemosphere 2010; 78 (3) 273-279'
'La2O3'	326	22	'5 days'	'growth inhibition assay'	'IC50'	149	0.000457055	'Cucumis sativus'	'Plant'	-3.34003	'Ma et al. Nanotoxicology 2011; 5(4) 743-753'
'La2O3'	326	24.6	'24 h'	'growth inhibition assay'	'IC50'	NaN	NaN	'E.coli'	'Bacteria'	NaN	'Kaweeteerawat et al. Environ. Sci. Technol. 2015, 49, 1105−1112'
'La2O3'	326	NaN	'2 h'	'Cell viability assay CFU'	'EC50'	439.762	0.00134896	'E.coli'	'Bacteria'	-2.87	'Puzyn et al. Nature Nanotech 6, 175–178 (2011)'
'La2O3'	326	NaN	'2 h'	'Cytotoxicity assay'	'LD50'	456.9	0.00140153	'E.coli'	'Bacteria'	-2.8534	'Hu et al. Sci. Total Environ. 407 (2009) 3070–3072'
'La2O3'	326	103.6	'48h'	'Cytotoxicity assay'	'LD50'	2.08	6.38037e-06	'RAW 264.7'	'Mammalian cells'	-5.19515	'Lim et al.,Toxicol. Res.,(2015) Vol. 31, No. 2, pp. 181-189
'MgO'	40	20	'24 h'	'MTT assay'	'ec50'	1000	0.025	'A549'	'Human cells'	-1.60206	'Horie et al. Metallomics, 2012, 4, 350–360'
'MgO'	40	NaN	'24 h'	'NRU assay'	'IC50'	NaN	NaN	'A549'	'Human cells'	NaN	'Ivansk et al. Curr Top Med Chem., 2015;15(18):1914-29'
'MgO'	40	23.8	'24 h'	'Cytotoxicity (MTS)'	'ec50 (in SFM medium)'	NaN	NaN	'A549 cells'	'Human cells'	NaN	'Areecheewakul, et al. NanoImpact 18 (2020) 100214'
'MgO'	40	23.8	'24 h'	'Cytotoxicity (MTS)'	'ec50 (in SCM medium)'	NaN	NaN	'A549 cells'	'Human cells'	NaN	'Areecheewakul, et al. NanoImpact 18 (2020) 100214'
'MgO'	40	23.8	'24 h'	'Cytotoxicity (PI staining)'	'ec50 (in SFM medium)'	150	0.00375	'A549 cells'	'Human cells'	-2.42597	'Areecheewakul, et al. NanoImpact 18 (2020) 100214'
'MgO'	40	23.8	'24 h'	'Cytotoxicity (PI staining)'	'ec50 (in SCM medium)'	150	0.00375	'A549 cells'	'Human cells'	-2.42597	'Areecheewakul, et al. NanoImpact 18 (2020) 100214'
'MgO'	40	NaN	'24 h'	'NRU assay'	'IC50'	NaN	NaN	'Balb/c'	'Mammalian cells'	NaN	'Ivansk et al. Curr Top Med Chem., 2015;15(18):1914-29'
'MgO'	40	NaN	'24 h'	'NRU assay'	'IC50'	NaN	NaN	'Caco2'	'Human cells'	NaN	'Ivansk et al. Curr Top Med Chem., 2015;15(18):1914-29'
'MgO'	40	NaN	'48 h'	'Acute toxicity assay'	'LC50'	140	0.0035	'Danio rerio (adults)'	'Fish'	-2.45593	'Kovrižnychet al. Interdisciplinary Toxicology. 2013; Vol. 6(2): 67–73'
'MgO'	40	NaN	'48 h'	'Acute toxicity assay'	'LC50'	3200	0.08	'Danio rerio (eggs)'	'Fish'	-1.09691	'Kovrižnychet al. Interdisciplinary Toxicology. 2013; Vol. 6(2): 67–73'
'MgO'	40	NaN	'48 h'	'Immobilization'	'EC50'	25.46	0.0006365	'Daphnia magna'	'Crustacean'	-3.1962	'Sovova et al., 2009, Proceedings,NANOCON Conference, Roznov , Czech Republic, pp 62‐71,'
'MgO'	40	20	'24 h'	'MTT assay'	'ec50'	1000	0.025	'Hacat'	'Human cells'	-1.60206	'Horie et al. Metallomics, 2012, 4, 350–360'
'MgO'	40	13.6	'24 h'	'Viability assay'	'EC50'	NaN	NaN	'Tetrahymena thermophila'	'Eukaryotes & Microalgae'	NaN	'Aruoja et al Environ. Sci.: Nano, 2015,2, 630-644'
'MgO'	40	13.6	'30 min'	'luminescence inhbition'	'EC50'	NaN	NaN	'Vibrio Fischeri'	'Bacteria'	NaN	'Aruoja et al Environ. Sci.: Nano, 2015,2, 630-644'
'MgO'	40	NaN	'30 min'	'bioluminescence inhibition assay'	'EC50'	61.87	0.00154675	'Vibrio fischeri'	'Bacteria'	-2.81058	'Sovova et al., 2009, Proceedings,NANOCON Conference, Roznov , Czech Republic, pp 62‐71,'
'Mn2O3'	158	NaN	'24 h'	'Cell viability'	'EC50'	50	0.000316456	'BEAS-2B'	'Human cells'	-3.49969	'Huang et al. Materials 2010, 3, 4842-4859;'
'Mn2O3'	158	51.5	'24 h'	'ATP assay'	'EC50'	13.1826	8.3434e-05	'BEAS-2B cells, ATP assay'	'Human cells'	-4.07866	'Zhang et al. ACS Nano 2012, 6, 5, 4349–4368'
'Mn2O3'	158	51.5	'24 h'	'MTS assay'	'EC50'	11.2202	7.10138e-05	'BEAS-2B cells, MTS assay'	'Human cells'	-4.14866	'Zhang et al. ACS Nano 2012, 6, 5, 4349–4368'
'Mn2O3'	158	NaN	'2 h'	'Cell Viability CFU assay'	'ec50'	130	0.000822785	'E Coli'	'Bacteria'	-3.08471	'Kar et al. Chemosphere 264 (2021) 128428'
'Mn2O3'	158	29.8	'24 h'	'CytoTox-Glo Cytotoxicity Assay'	'LC50'	362	0.00229114	'Hacat cells'	'Human cells'	-2.63995	'Gajewicz et al. Nanotoxicology, 2015;9(3):313-25'
'Mn2O3'	158	51.5	'24 h'	'ATP assay'	'EC50'	12.5893	7.96788e-05	'RAW 2647 cells, ATP assay'	'Mammalian cells'	-4.09866	'Zhang et al. ACS Nano 2012, 6, 5, 4349–4368'
'Mn2O3'	158	51.5	'24 h'	'MTS assay'	'EC50'	10.2329	6.47654e-05	'RAW 2647 cells, MTS assay'	'Mammalian cells'	-4.18866	'Zhang et al. ACS Nano 2012, 6, 5, 4349–4368'
'Mn2O3'	158	NaN	'10 h'	'Activity inhibition'	'IC50'	170	0.00107595	'Saccharomyces cerevisae'	'Eukaryotes & Microalgae'	-2.96821	'Otero-González et al. / Chemosphere 93 (2013) 1201–1206'
'Mn2O3'	158	NaN	'10 h'	'Activity inhibition'	'IC50'	280	0.00177215	'Saccharomyces cerevisae'	'Eukaryotes & Microalgae'	-2.7515	'Otero-González et al. / Chemosphere 93 (2013) 1201–1206'
'Mn2O3'	158	NaN	'10 h'	'FungaLight kit, membrane damage assay'	'EC50'	1000	0.00632911	'Saccharomyces cerevisae'	'Eukaryotes & Microalgae'	-2.19866	'Otero-González et al. / Chemosphere 93 (2013) 1201–1206'
'Mn3O4'	229	14.9	'24 h'	'NRU assay'	'IC50'	136.2	0.00059476	'A549'	'Human cells'	-3.22566	'Ivansk et al. Curr Top Med Chem., 2015;15(18):1914-29'
'Mn3o4'	229	NaN	'108'	'resazurin fluorescence assay'	'ec50'	31.8	0.000138865	'A549'	'Human cells'	-3.85741	'Titma et al. Cytotechnology. 2016;68(6):2363-2377'
'Mn3o4'	229	NaN	'216'	'resazurin fluorescence assay'	'ec50'	47.1	0.000205677	'A549'	'Human cells'	-3.68681	'Titma et al. Cytotechnology. 2016;68(6):2363-2377'
'Mn3o4'	229	NaN	'36 h'	'resazurin fluorescence assay'	'ec50'	90.6	0.000395633	'A549'	'Human cells'	-3.40271	'Titma et al. Cytotechnology. 2016;68(6):2363-2377'
'Mn3O4'	229	14.9	'24 h'	'NRU assay'	'IC50'	195	0.000851528	'Balb/c'	'Mammalian cells'	-3.0698	'Ivansk et al. Curr Top Med Chem., 2015;15(18):1914-29'
'Mn3o4'	229	NaN	'24 h'	'resazurin fluorescence assay'	'ec50'	49.9	0.000217904	'Balb/c 3T3'	'Mammalian cells'	-3.66173	'Titma et al. Cytotechnology. 2016;68(6):2363-2377'
'Mn3O4'	229	14.9	'24 h'	'NRU assay'	'IC50'	66.7	0.000291266	'Caco2'	'Human cells'	-3.53571	'Ivansk et al. Curr Top Med Chem., 2015;15(18):1914-29'
'Mn3o4'	229	NaN	'216'	'resazurin fluorescence assay'	'ec50'	28.9	0.000126201	'Caco2'	'Human cells'	-3.89894	'Titma et al. Cytotechnology. 2016;68(6):2363-2377'
'Mn3o4'	229	NaN	'60 h'	'resazurin fluorescence assay'	'ec50'	33.2	0.000144978	'Caco2'	'Human cells'	-3.8387	'Titma et al. Cytotechnology. 2016;68(6):2363-2377'
'MoO3'	144	100	'24 h'	'MTT assay'	'ec50'	1000	0.00694444	'A549'	'Human cells'	-2.15836	'Horie et al. Metallomics, 2012, 4, 350–360'
'MoO3'	144	100	'24 h'	'MTT assay'	'ec50'	1000	0.00694444	'Hacat'	'Human cells'	-2.15836	'Horie et al. Metallomics, 2012, 4, 350–360'
'Ni'	59	NaN	'24 h'	'Neutral Red assay.'	'IC50'	1032	0.0174915	'a549'	'Human cells'	-1.75717	'Lanone et al. Particle and Fibre Toxicology 2009, 6:28'
'Ni'	59	NaN	'24 h'	'Neutral Red assay.'	'IC50'	509.9	0.00864237	'a549'	'Human cells'	-2.06337	'Lanone et al. Particle and Fibre Toxicology 2009, 6:29'
'Ni'	59	6.1	'48 h'	'static renewal assay'	'LC50'	3.89	6.59322e-05	'Daphnia pulex (adults)'	'Crustacean'	-4.1809	'Griffit et al. Environm. Toxicol. Chem. 2008; 27 (9) 1972–1978'
'Ni'	59	NaN	'24 h'	'MTT assay'	'IC50'	79.46	0.00134678	'THP-1'	'Human cells'	-2.8707	'Lanone et al. Particle and Fibre Toxicology 2009, 6:14'
'Ni'	59	NaN	'24 h'	'Neutral Red assay.'	'IC50'	141	0.00238983	'THP-1'	'Human cells'	-2.62163	'Lanone et al. Particle and Fibre Toxicology 2009, 6:29'
'Ni2O3'	165	140.6	'24 h'	'ATP assay'	'EC50'	63.0957	0.000382398	'BEAS-2B cells, ATP assay'	'Human cells'	-3.41748	'Zhang et al. ACS Nano 2012, 6, 5, 4349–4368'
'Ni2O3'	165	140.6	'24 h'	'MTS assay'	'EC50'	331.131	0.00200686	'BEAS-2B cells, MTS assay'	'Human cells'	-2.69748	'Zhang et al. ACS Nano 2012, 6, 5, 4349–4368'
'Ni2O3'	165	140.6	'24 h'	'ATP assay'	'EC50'	87.0964	0.000527857	'RAW 2647 cells, ATP assay'	'Mammalian cells'	-3.27748	'Zhang et al. ACS Nano 2012, 6, 5, 4349–4368'
'Ni2O3'	165	140.6	'24 h'	'MTS assay'	'EC50'	316.228	0.00191653	'RAW 2647 cells, MTS assay'	'Mammalian cells'	-2.71748	'Zhang et al. ACS Nano 2012, 6, 5, 4349–4368'
'NiO'	75	48.9	'24 h'	'MTT assay'	'IC50'	994.9	0.0132653	'a549'	'Human cells'	-1.87728	'Lanone et al. Particle and Fibre Toxicology 2009, 6:14'
'NiO'	75	10.96	'24 h'	'CCK-8 cytotoxicity assay'	'EC50'	90.1698	0.00120226	'A549 cells'	'Human cells'	-2.92	'Cao et al. Green Chem., 2020,22, 3512-3521'
'NiO'	75	13.1	'24 h'	'MTS assay'	'EC50'	416869	5.55826	'BEAS-2B cells, MTS assay'	'Human cells'	0.744939	'Zhang et al. ACS Nano 2012, 6, 5, 4349–4368'
'NiO'	75	13.1	'24 h'	'ATP assay'	'EC50'	NaN	NaN	'BEAS-2B cells, MTS assay'	'Human cells'	NaN	'Zhang et al. ACS Nano 2012, 6, 5, 4349–4368'
'NiO'	75	30	'3 days'	'Phytotoxicity (root length)'	'EC50'	228	0.00304	'Cucumis sativus'	'Plant'	-2.51713	'Wu et al. J Pet Environ Biotechnol, 2012, 3:126'
'NiO'	75	NaN	'48 h'	'Acute toxicity assay'	'LC50'	200	0.00266667	'Danio rerio (adults)'	'Fish'	-2.57403	'Kovrižnychet al. Interdisciplinary Toxicology. 2013; Vol. 6(2): 67–73'
'NiO'	75	NaN	'48 h'	'Acute toxicity assay'	'LC50'	800	0.0106667	'Danio rerio (eggs)'	'Fish'	-1.97197	'Kovrižnychet al. Interdisciplinary Toxicology. 2013; Vol. 6(2): 67–73'
'NiO'	75	14	'30 min'	'Cell viability assay CFU'	'LC50'	12.1636	0.000162181	'E.coli'	'Bacteria'	-3.79	'Pathakoti et al. Journal of Photochemistry and Photobiology B: Biology 130 (2014) 234–240'
'NiO'	75	30	'1.5 h'	'bioluminescence activity assay'	'EC50'	198.02	0.00264027	'E.coli'	'Bacteria'	-2.57835	'Ko et al. Appl Microbiol Biotechnol (2014) 98:3295–3303'
'NiO'	75	NaN	'2 h'	'Cell viability assay CFU'	'EC50'	26.611	0.000354813	'E.coli'	'Bacteria'	-3.45	'Puzyn et al. Nature Nanotech 6, 175–178 (2011)'
'NiO'	75	30	'3 days'	'Phytotoxicity (root length)'	'EC50'	27.9	0.000372	'Lactuca sativa'	'Plants'	-3.42946	'Wu et al. J Pet Environ Biotechnol, 2012, 3:126'
'NiO'	75	NaN	'4 days'	'growth inhibition assay'	'EC50'	0.57	7.6e-06	'Lactuca sativa L.'	'Plants'	-5.11919	'Kong et al. Nanomaterials 2021, 11, 1653'
'NiO'	75	NaN	'4 days'	'growth inhibition assay'	'EC50'	5.57	7.42667e-05	'Lactuca sativa L.'	'Plants'	-4.12921	'Kong et al. Nanomaterials 2021, 11, 1653'
'NiO'	75	30	'3 days'	'Phytotoxicity (root length)'	'EC50'	400	0.00533333	'Raphanus sativus'	'Plants'	-2.273	'Wu et al. J Pet Environ Biotechnol, 2012, 3:126'
'NiO'	75	NaN	'4 days'	'growth inhibition assay'	'EC50'	2.85	3.8e-05	'Raphanus sativus'	'Plants'	-4.42022	'Kong et al. Nanomaterials 2021, 11, 1653'
'NiO'	75	30	'3 days'	'Seed germination'	'EC50'	114.21	0.0015228	'Raphanus sativus L'	'Plants'	-2.81736	'Ko et al. Appl Microbiol Biotechnol (2014) 98:3295–3303'
'NiO'	75	13.1	'24 h'	'MTS assay'	'EC50'	151.356	0.00201808	'RAW 2647 cells, MTS assay'	'Mammalian cells'	-2.69506	'Zhang et al. ACS Nano 2012, 6, 5, 4349–4368'
'NiO'	75	13.1	'24 h'	'ATP assay'	'EC50'	NaN	NaN	'RAW 2647 cells, MTS assay'	'Mammalian cells'	NaN	'Zhang et al. ACS Nano 2012, 6, 5, 4349–4368'
'NiO'	75	48.9	'24 h'	'MTT assay'	'IC50'	23.31	0.0003108	'THP-1'	'Human cells'	-3.50752	'Lanone et al. Particle and Fibre Toxicology 2009, 6:14'
'NiO'	75	48.9	'24 h'	'MTT assay'	'IC50'	1613	0.0215067	'THP-1'	'Human cells'	-1.66743	'Lanone et al. Particle and Fibre Toxicology 2009, 6:14'
'NiO'	75	48.9	'24 h'	'Neutral Red assay.'	'IC50'	2.36	3.14667e-05	'THP-1'	'Human cells'	-4.50215	'Lanone et al. Particle and Fibre Toxicology 2009, 6:29'
'Pd'	106	100	'96 h'	'growth inhibition assay'	'EC50'	7.54	7.11321e-05	'Soil bacterial community'	'Bacteria'	-4.14793	'Y. Zhai et al. Ecotoxicology and Environmental Safety 145 (2017) 349–365'
'Pd'	106	150	'96 h'	'growth inhibition assay'	'EC50'	9.36	8.83019e-05	'Soil bacterial community'	'Bacteria'	-4.05403	'Y. Zhai et al. Ecotoxicology and Environmental Safety 145 (2017) 349–366'
'Pd'	106	15.1	'30 min'	'luminescence inhbition'	'EC50'	55.42	0.00052283	'Vibrio Fischeri'	'Bacteria'	-3.28164	'Aruoja et al Environ. Sci.: Nano, 2015,2, 630-644'
'Sb2O3'	292	NaN	'108'	'resazurin fluorescence assay'	'ec50'	38.5	0.000131849	'A549'	'Human cells'	-3.87992	'Titma et al. Cytotechnology. 2016;68(6):2363-2377'
'Sb2O3'	292	NaN	'60 h'	'resazurin fluorescence assay'	'ec50'	59.1	0.000202397	'A549'	'Human cells'	-3.6938	'Titma et al. Cytotechnology. 2016;68(6):2363-2377'
'Sb2O3'	292	NaN	'36 h'	'resazurin fluorescence assay'	'ec50'	84.6	0.000289726	'A549'	'Human cells'	-3.53801	'Titma et al. Cytotechnology. 2016;68(6):2363-2377'
'Sb2O3'	292	107.91	'24 h'	'CCK-8 cytotoxicity assay'	'EC50'	422.068	0.00144544	'A549 cells'	'Human cells'	-2.84	'Cao et al. Green Chem., 2020,22, 3512-3521'
'Sb2O3'	292	20.8	'24 h'	'NRU assay'	'IC50'	39.1	0.000133904	'Balb/c'	'Mammalian cells'	-3.87321	'Ivansk et al. Curr Top Med Chem., 2015;15(18):1914-29'
'Sb2O3'	292	20.8	'24 h'	'NRU assay'	'IC50'	57.2	0.00019589	'Caco2'	'Human cells'	-3.70799	'Ivansk et al. Curr Top Med Chem., 2015;15(18):1914-29'
'Sb2O3'	292	NaN	'60 h'	'resazurin fluorescence assay'	'ec50'	38	0.000130137	'Caco2'	'Human cells'	-3.8856	'Titma et al. Cytotechnology. 2016;68(6):2363-2377'
'Sb2O3'	292	NaN	'108'	'resazurin fluorescence assay'	'ec50'	47.4	0.000162329	'Caco2'	'Human cells'	-3.7896	'Titma et al. Cytotechnology. 2016;68(6):2363-2377'
'Sb2O3'	292	NaN	'36 h'	'resazurin fluorescence assay'	'ec50'	66.8	0.000228767	'Caco2'	'Human cells'	-3.64061	'Titma et al. Cytotechnology. 2016;68(6):2363-2377'
'Sb2O3'	292	NaN	'24 h'	'TEER assay'	'ec50'	10	3.42466e-05	'Caco2'	'Human cells'	-4.46538	'Titma et al. Cytotechnology. 2016;68(6):2363-2377'
'Sb2O3'	292	NaN	'72'	'TEER assay'	'ec50'	10	3.42466e-05	'Caco2'	'Human cells'	-4.46538	'Titma et al. Cytotechnology. 2016;68(6):2363-2377'
'Sb2O3'	292	NaN	'2 h'	'Cell viability assay CFU'	'EC50'	668.933	0.00229087	'E.coli'	'Bacteria'	-2.64	'Puzyn et al. Nature Nanotech 6, 175–178 (2011)'
'Sb2O3'	292	20.5	'30 min'	'luminescence inhbition'	'EC50'	73.74	0.000252534	'Vibrio Fischeri'	'Bacteria'	-3.59768	'Aruoja et al Environ. Sci.: Nano, 2015,2, 630-644'
'SiO2'	60	12	'24 h'	'NRU assay'	'IC50'	NaN	NaN	'A549'	'Human cells'	NaN	'Ivansk et al. Curr Top Med Chem., 2015;15(18):1914-29'
'SiO2'	60	15.23	'24 h'	'CCK-8 cytotoxicity assay'	'EC50'	293.867	0.00489779	'A549 cells'	'Human cells'	-2.31	'Cao et al. Green Chem., 2020,22, 3512-3521'
'SiO2'	60	13.5	'24 h'	'ATP assay'	'EC50'	200	0.00333333	'BEAS-2B cells, ATP assay'	'Human cells'	-2.47712	'Zhang et al. ACS Nano 2012, 6, 5, 4349–4368'
'SiO2'	60	12	'24 h'	'NRU assay'	'IC50'	NaN	NaN	'Caco2'	'Human cells'	NaN	'Ivansk et al. Curr Top Med Chem., 2015;15(18):1914-29'
'SiO2'	60	NaN	'48 h'	'Acute toxicity assay'	'LC50'	1600	0.0266667	'Danio rerio (adults)'	'Fish'	-1.57403	'Kovrižnychet al. Interdisciplinary Toxicology. 2013; Vol. 6(2): 67–73'
'SiO2'	60	15	'120 h'	'Fish embryo survival'	'LC50'	NaN	NaN	'Danio rerio embryos'	'Fish'	NaN	'Lacave et al. Nanotechnology 27 (2016) 325102'
'SiO2'	60	30	'120 h'	'Fish embryo survival'	'LC50'	NaN	NaN	'Danio rerio embryos'	'Fish'	NaN	'Lacave et al. Nanotechnology 27 (2016) 325102'
'SiO2'	60	70	'120 h'	'Fish embryo survival'	'LC50'	83.33	0.00138883	'Danio rerio embryos'	'Fish'	-2.85735	'Lacave et al. Nanotechnology 27 (2016) 325102'
'SiO2'	60	212	'48 h'	'Immobilization'	'ec50'	NaN	NaN	'Daphnia magna'	'Crustacean'	NaN	'Bondarenko et al. Nanotoxicology, 2016; 10(9): 1229–1242'
'SiO2'	60	13.5	'24 h'	'growth inhibition assay'	'IC50'	500	0.00833333	'E.coli'	'Bacteria'	-2.07918	'Kaweeteerawat et al. Environ. Sci. Technol. 2015, 49, 1105−1112'
'SiO2'	60	20	'30 min'	'Cell viability assay CFU'	'LC50'	173.042	0.00288403	'E.coli'	'Bacteria'	-2.54	'Pathakoti et al. Journal of Photochemistry and Photobiology B: Biology 130 (2014) 234–240'
'SiO2'	60	NaN	'2 h'	'Cell viability assay CFU'	'EC50'	378.574	0.00630957	'E.coli'	'Bacteria'	-2.2	'Puzyn et al. Nature Nanotech 6, 175–178 (2011)'
'SiO2'	60	212	'4 h'	'growth inhibition assay'	'ec50'	NaN	NaN	'Escherichia Coli'	'Bacteria'	NaN	'Bondarenko et al. Nanotoxicology, 2016; 10(9): 1229–1242'
'SiO2'	60	15	'24 h'	'MTT assay'	'LC50'	NaN	NaN	'gill cells'	'Fish'	NaN	'Katsumiti et al. Nanotoxicology. 2016;10(2):185-96'
'SiO2'	60	27	'24 h'	'MTT assay'	'LC50'	NaN	NaN	'gill cells'	'Fish'	NaN	'Katsumiti et al. Nanotoxicology. 2016;10(2):185-99'
'SiO2'	60	30	'24 h'	'MTT assay'	'LC50'	NaN	NaN	'gill cells'	'Fish'	NaN	'Katsumiti et al. Nanotoxicology. 2016;10(2):185-97'
'SiO2'	60	70	'24 h'	'MTT assay'	'LC50'	NaN	NaN	'gill cells'	'Fish'	NaN	'Katsumiti et al. Nanotoxicology. 2016;10(2):185-98'
'SiO2'	60	15	'24 h'	'CytoTox-Glo Cytotoxicity Assay'	'LC50'	453	0.00755	'Hacat cells'	'Human cells'	-2.12205	'Gajewicz et al. Nanotoxicology, 2015;9(3):313-25'
'SiO2'	60	30	'24 h'	'MTT assay'	'LC50'	NaN	NaN	'hemocytes'	'other'	NaN	'Katsumiti et al. Nanotoxicology. 2016;10(2):185-97'
'SiO2'	60	70	'24 h'	'MTT assay'	'LC50'	NaN	NaN	'hemocytes'	'other'	NaN	'Katsumiti et al. Nanotoxicology. 2016;10(2):185-98'
'SiO2'	60	212	'24 h'	'Membrane integrity'	'ec50'	NaN	NaN	'human mesenchymal stem cells'	'Human cells'	NaN	'Bondarenko et al. Nanotoxicology, 2016; 10(9): 1229–1242'
'SiO2'	60	212	'24 h'	'MTT assay'	'ec50'	NaN	NaN	'human mesenchymal stem cells (MTT)'	'Human cells'	NaN	'Bondarenko et al. Nanotoxicology, 2016; 10(9): 1229–1242'
'SiO2'	60	212	'48 h'	'Membrane integrity'	'ec50'	NaN	NaN	'murine Fibroblasts (membrane integrity)'	'Mammalian cells'	NaN	'Bondarenko et al. Nanotoxicology, 2016; 10(9): 1229–1242'
'SiO2'	60	212	'24 h'	'WST-1'	'ec50'	NaN	NaN	'murine Fibroblasts BALB/c 3t3'	'Mammalian cells'	NaN	'Bondarenko et al. Nanotoxicology, 2016; 10(9): 1229–1242'
'SiO2'	60	8.2	'48 h'	'Static acute toxicity'	'LC50'	442.6	0.00737667	'P. multimicronucleatum'	'Eukaryotes & Microalgae'	-2.13214	'Li et al. 2012, Chem. Res. Toxicol, 25, 1675−1681'
'SiO2'	60	212	'4 h'	'growth inhibition assay'	'ec50'	NaN	NaN	'Pseudomonas putida'	'Bacteria'	NaN	'Bondarenko et al. Nanotoxicology, 2016; 10(9): 1229–1242'
'SiO2'	60	212	'-'	'WST-1'	'ec50'	NaN	NaN	'rat macrophages'	'Mammalian cells'	NaN	'Bondarenko et al. Nanotoxicology, 2016; 10(9): 1229–1242'
'SiO2'	60	13.5	'24 h'	'ATP assay'	'EC50'	200	0.00333333	'RAW 2647 cells, ATP assay'	'Mammalian cells'	-2.47712	'Zhang et al. ACS Nano 2012, 6, 5, 4349–4368'
'SiO2'	60	13.5	'24 h'	'MTS assay'	'EC50'	200	0.00333333	'RAW 2647 cells, MTS assay'	'Mammalian cells'	-2.47712	'Zhang et al. ACS Nano 2012, 6, 5, 4349–4368'
'SiO2'	60	7.8	'24 h'	'Viability assay'	'EC50'	NaN	NaN	'Tetrahymena thermophila'	'Eukaryotes & Microalgae'	NaN	'Aruoja et al Environ. Sci.: Nano, 2015,2, 630-644'
'SiO2'	60	212	'24 h'	'Viability assay'	'ec50'	NaN	NaN	'Tetrahymena thermophila'	'Eukaryotes & Microalgae'	NaN	'Bondarenko et al. Nanotoxicology, 2016; 10(9): 1229–1242'
'SiO2'	60	7.8	'30 min'	'luminescence inhbition'	'EC50'	NaN	NaN	'Vibrio Fischeri'	'Bacteria'	NaN	'Aruoja et al Environ. Sci.: Nano, 2015,2, 630-644'
'SiO2'	60	212	'30 min'	'bioluminescence inhibition assay'	'ec50'	NaN	NaN	'Vibrio fischeri'	'Bacteria'	NaN	'Bondarenko et al. Nanotoxicology, 2016; 10(9): 1229–1242'
'SiO2'	60	NaN	'10 h'	'Activity inhibition'	'IC50'	1000	0.0166667	'Saccharomyces cerevisae'	'Eukaryotes & Microalgae'	-1.77815	'García-Saucedo et al. / Journal of Hazardous Materials 192 (2011) 1572–1579'
'SiO2'	60	NaN	'10 h'	'Activity inhibition'	'IC50'	1000	0.0166667	'Saccharomyces cerevisae'	'Eukaryotes & Microalgae'	-1.77815	'García-Saucedo et al. / Journal of Hazardous Materials 192 (2011) 1572–1579'
'SiO2'	60	NaN	'10 h'	'FungaLight kit, membrane damage assay'	'EC50'	1000	0.0166667	'Saccharomyces cerevisae'	'Eukaryotes & Microalgae'	-1.77815	'García-Saucedo et al. / Journal of Hazardous Materials 192 (2011) 1572–1579'
'Sn'	119	NaN	'48 h'	'Acute toxicity assay'	'LC50'	800	0.00672269	'Danio rerio (adults)'	'Fish'	-2.17246	'Kovrižnychet al. Interdisciplinary Toxicology. 2013; Vol. 6(2): 67–73'
'SnO2'	151	21	'24 h'	'MTT assay'	'ec50'	1000	0.00662252	'A549'	'Human cells'	-2.17898	'Horie et al. Metallomics, 2012, 4, 350–360'
'SnO2'	151	26.85	'24 h'	'CCK-8 cytotoxicity assay'	'EC50'	5482.48	0.0363078	'A549 cells'	'Human cells'	-1.44	'Cao et al. Green Chem., 2020,22, 3512-3521'
'SnO2'	151	62.4	'24 h'	'ATP assay'	'EC50'	NaN	NaN	'BEAS-2B cells, ATP assay'	'Human cells'	NaN	'Zhang et al. ACS Nano 2012, 6, 5, 4349–4368'
'SnO2'	151	62.4	'24 h'	'MTS assay'	'EC50'	NaN	NaN	'BEAS-2B cells, MTS assay'	'Human cells'	NaN	'Zhang et al. ACS Nano 2012, 6, 5, 4349–4368'
'SnO2'	151	NaN	'48 h'	'Acute toxicity assay'	'LC50'	1600	0.010596	'Danio rerio (adults)'	'Fish'	-1.97486	'Kovrižnychet al. Interdisciplinary Toxicology. 2013; Vol. 6(2): 67–73'
'SnO2'	151	NaN	'48 h'	'Acute toxicity assay'	'LC50'	1600	0.010596	'Danio rerio (eggs)'	'Fish'	-1.97486	'Kovrižnychet al. Interdisciplinary Toxicology. 2013; Vol. 6(2): 67–73'
'SnO2'	151	15	'30 min'	'Cell viability assay CFU'	'LC50'	445.633	0.00295121	'E.coli'	'Bacteria'	-2.53	'Pathakoti et al. Journal of Photochemistry and Photobiology B: Biology 130 (2014) 234–240'
'SnO2'	151	NaN	'2 h'	'Cytotoxicity assay'	'LD50'	1045.6	0.0069245	'E.coli'	'Bacteria'	-2.15961	'Hu et al. Sci. Total Environ. 407 (2009) 3070–3072'
'SnO2'	151	21	'24 h'	'MTT assay'	'ec50'	1000	0.00662252	'Hacat'	'Human cells'	-2.17898	'Horie et al. Metallomics, 2012, 4, 350–360'
'SnO2'	151	46.1	'24 h'	'CytoTox-Glo Cytotoxicity Assay'	'LC50'	322	0.00213245	'Hacat cells'	'Human cells'	-2.67112	'Gajewicz et al. Nanotoxicology, 2015;9(3):313-25'
'SnO2'	151	62.4	'24 h'	'ATP assay'	'EC50'	100000	0.662252	'RAW 2647 cells, ATP assay'	'Mammalian cells'	-0.178977	'Zhang et al. ACS Nano 2012, 6, 5, 4349–4368'
'SnO2'	151	62.4	'24 h'	'MTS assay'	'EC50'	NaN	NaN	'RAW 2647 cells, MTS assay'	'Mammalian cells'	NaN	'Zhang et al. ACS Nano 2012, 6, 5, 4349–4368'
'SnO2'	151	33	'24 h'	'MTT assay'	'IC50'	174	0.00115232	'THP-1'	'Human cells'	-2.93843	'Lanone et al. Particle and Fibre Toxicology 2009, 6:14'
'SnO2'	151	33	'24 h'	'MTT assay'	'IC50'	3.33	2.2053e-05	'THP-1'	'Human cells'	-4.65653	'Lanone et al. Particle and Fibre Toxicology 2009, 6:14'
'SnO2'	151	33	'24 h'	'Neutral Red assay.'	'IC50'	562.1	0.00372252	'THP-1'	'Human cells'	-2.42916	'Lanone et al. Particle and Fibre Toxicology 2009, 6:29'
'TiO2'	80	14.2	'24 h'	'NRU assay'	'IC50'	NaN	NaN	'A549'	'Human cells'	NaN	'Ivansk et al. Curr Top Med Chem., 2015;15(18):1914-29'
'TiO2'	80	NaN	'24 h'	'Cellular proliferation colorimetric assay'	'LD 50'	1000	0.0125	'A549'	'Human cells'	-1.90309	'Lozano et al 2011 J. Phys.: Conf. Ser. 304 012046'
'TiO2'	80	NaN	'48 h'	'Cellular proliferation colorimetric assay'	'LD 50'	1000	0.0125	'A549'	'Human cells'	-1.90309	'Lozano et al 2011 J. Phys.: Conf. Ser. 304 012046'
'TiO2'	80	NaN	'36 h'	'resazurin fluorescence assay'	'ec50'	NaN	NaN	'A549'	'Human cells'	NaN	'Titma et al. Cytotechnology. 2016;68(6):2363-2377'
'TiO2'	80	NaN	'12 h'	'resazurin fluorescence assay'	'ec50'	NaN	NaN	'A549'	'Human cells'	NaN	'Titma et al. Cytotechnology. 2016;68(6):2363-2377'
'TiO2'	80	NaN	'60 h'	'resazurin fluorescence assay'	'ec50'	NaN	NaN	'A549'	'Human cells'	NaN	'Titma et al. Cytotechnology. 2016;68(6):2363-2377'
'TiO2'	80	NaN	'108'	'resazurin fluorescence assay'	'ec50'	NaN	NaN	'A549'	'Human cells'	NaN	'Titma et al. Cytotechnology. 2016;68(6):2363-2377'
'TiO2'	80	NaN	'216'	'resazurin fluorescence assay'	'ec50'	NaN	NaN	'A549'	'Human cells'	NaN	'Titma et al. Cytotechnology. 2016;68(6):2363-2377'
'TiO2'	80	NaN	'12 h'	'resazurin fluorescence assay'	'ec50'	NaN	NaN	'A549'	'Human cells'	NaN	'Titma et al. Cytotechnology. 2016;68(6):2363-2377'
'TiO2'	80	NaN	'24 h'	'resazurin fluorescence assay'	'ec50'	NaN	NaN	'A549'	'Human cells'	NaN	'Titma et al. Cytotechnology. 2016;68(6):2363-2377'
'TiO2'	80	NaN	'60 h'	'resazurin fluorescence assay'	'ec50'	NaN	NaN	'A549'	'Human cells'	NaN	'Titma et al. Cytotechnology. 2016;68(6):2363-2377'
'TiO2'	80	NaN	'108'	'resazurin fluorescence assay'	'ec50'	NaN	NaN	'A549'	'Human cells'	NaN	'Titma et al. Cytotechnology. 2016;68(6):2363-2377'
'TiO2'	80	NaN	'216'	'resazurin fluorescence assay'	'ec50'	NaN	NaN	'A549'	'Human cells'	NaN	'Titma et al. Cytotechnology. 2016;68(6):2363-2377'
'TiO2'	80	NaN	'24 h'	'aBlue'	'IC50'	NaN	NaN	'A549'	'Human cells'	NaN	'Seiffert et al., 2012,Chem. Res. Toxicol., 25, 140–152'
'TiO2'	80	NaN	'24 h'	'Impedance'	'IC50'	NaN	NaN	'A549'	'Human cells'	NaN	'Seiffert et al., 2012,Chem. Res. Toxicol., 25, 140–152'
'TiO2'	80	NaN	'24 h'	'NRU assay'	'IC50'	NaN	NaN	'A549'	'Human cells'	NaN	'Seiffert et al., 2012,Chem. Res. Toxicol., 25, 140–152'
'TiO2'	80	NaN	'24 h'	'Impedance'	'IC50'	NaN	NaN	'A549'	'Human cells'	NaN	'Seiffert et al., 2012,Chem. Res. Toxicol., 25, 140–152'
'TiO2'	80	NaN	'24 h'	'MTT'	'IC50'	NaN	NaN	'A549'	'Human cells'	NaN	'Seiffert et al., 2012,Chem. Res. Toxicol., 25, 140–152'
'TiO2'	80	NaN	'24 h'	'WST-1'	'IC50'	NaN	NaN	'A549'	'Human cells'	NaN	'Seiffert et al., 2012,Chem. Res. Toxicol., 25, 140–152'
'TiO2'	80	NaN	'24 h'	'MTT assay'	'ec50'	1000	0.0125	'A549'	'Human cells'	-1.90309	'Horie et al. Metallomics, 2012, 4, 350–360'
'TiO2'	80	21.2	'24 h'	'CCK-8 cytotoxicity assay'	'EC50'	129.745	0.00162181	'A549 cells'	'Human cells'	-2.79	'Cao et al. Green Chem., 2020,22, 3512-3521'
'TiO2'	80	113.4	'24 h'	'Cytotoxicity (MTS)'	'ec50 (in SFM medium)'	NaN	NaN	'A549 cells'	'Human cells'	NaN	'Areecheewakul, et al. NanoImpact 18 (2020) 100214'
'TiO2'	80	113.4	'24 h'	'Cytotoxicity (MTS)'	'ec50 (in SCM medium)'	NaN	NaN	'A549 cells'	'Human cells'	NaN	'Areecheewakul, et al. NanoImpact 18 (2020) 100214'
'TiO2'	80	113.4	'24 h'	'Cytotoxicity (PI staining)'	'ec50 (in SFM medium)'	NaN	NaN	'A549 cells'	'Human cells'	NaN	'Areecheewakul, et al. NanoImpact 18 (2020) 100214'
'TiO2'	80	113.4	'24 h'	'Cytotoxicity (PI staining)'	'ec50 (in SCM medium)'	NaN	NaN	'A549 cells'	'Human cells'	NaN	'Areecheewakul, et al. NanoImpact 18 (2020) 100214'
'TiO2'	80	5	'4 h'	'growth inhibition assay'	'ec50'	NaN	NaN	'Bacillus subtilis'	'Bacteria'	NaN	'Bondarenko et al. Nanotoxicology, 2016; 10(9): 1229–1242'
'TiO2'	80	14.2	'24 h'	'NRU assay'	'IC50'	NaN	NaN	'Balb/c'	'Mammalian cells'	NaN	'Ivansk et al. Curr Top Med Chem., 2015;15(18):1914-29'
'TiO2'	80	NaN	'24 h'	'resazurin fluorescence assay'	'ec50'	NaN	NaN	'Balb/c 3T3'	'Mammalian cells'	NaN	'Titma et al. Cytotechnology. 2016;68(6):2363-2377'
'TiO2'	80	NaN	'24 h'	'Cell viability'	'EC50'	NaN	NaN	'BEAS-2B'	'Human cells'	NaN	'Huang et al. Materials 2010, 3, 4842-4859;'
'TiO2'	80	12.6	'24 h'	'ATP assay'	'EC50'	NaN	NaN	'BEAS-2B cells, ATP assay'	'Human cells'	NaN	'Zhang et al. ACS Nano 2012, 6, 5, 4349–4368'
'TiO2'	80	12.6	'24 h'	'MTS assay'	'EC50'	NaN	NaN	'BEAS-2B cells, MTS assay'	'Human cells'	NaN	'Zhang et al. ACS Nano 2012, 6, 5, 4349–4368'
'TiO2'	80	14.2	'24 h'	'NRU assay'	'IC50'	NaN	NaN	'Caco2'	'Human cells'	NaN	'Ivansk et al. Curr Top Med Chem., 2015;15(18):1914-29'
'TiO2'	80	NaN	'12 h'	'resazurin fluorescence assay'	'ec50'	NaN	NaN	'Caco2'	'Human cells'	NaN	'Titma et al. Cytotechnology. 2016;68(6):2363-2377'
'TiO2'	80	NaN	'24 h'	'resazurin fluorescence assay'	'ec50'	NaN	NaN	'Caco2'	'Human cells'	NaN	'Titma et al. Cytotechnology. 2016;68(6):2363-2377'
'TiO2'	80	NaN	'60 h'	'resazurin fluorescence assay'	'ec50'	NaN	NaN	'Caco2'	'Human cells'	NaN	'Titma et al. Cytotechnology. 2016;68(6):2363-2377'
'TiO2'	80	NaN	'216'	'resazurin fluorescence assay'	'ec50'	NaN	NaN	'Caco2'	'Human cells'	NaN	'Titma et al. Cytotechnology. 2016;68(6):2363-2377'
'TiO2'	80	NaN	'36 h'	'resazurin fluorescence assay'	'ec50'	NaN	NaN	'Caco2'	'Human cells'	NaN	'Titma et al. Cytotechnology. 2016;68(6):2363-2377'
'TiO2'	80	NaN	'12 h'	'resazurin fluorescence assay'	'ec50'	NaN	NaN	'Caco2'	'Human cells'	NaN	'Titma et al. Cytotechnology. 2016;68(6):2363-2377'
'TiO2'	80	NaN	'60 h'	'resazurin fluorescence assay'	'ec50'	NaN	NaN	'Caco2'	'Human cells'	NaN	'Titma et al. Cytotechnology. 2016;68(6):2363-2377'
'TiO2'	80	NaN	'108'	'resazurin fluorescence assay'	'ec50'	NaN	NaN	'Caco2'	'Human cells'	NaN	'Titma et al. Cytotechnology. 2016;68(6):2363-2377'
'TiO2'	80	NaN	'216'	'resazurin fluorescence assay'	'ec50'	NaN	NaN	'Caco2'	'Human cells'	NaN	'Titma et al. Cytotechnology. 2016;68(6):2363-2377'
'TiO2'	80	NaN	'3 days'	'Phytotoxicity (root length)'	'EC50'	5000	0.0625	'Cucumis sativus'	'Plant'	-1.20412	'Wu et al. J Pet Environ Biotechnol, 2012, 3:126'
'TiO2'	80	NaN	'48 h'	'Acute toxicity assay'	'LC50'	1600	0.02	'Danio rerio (adults)'	'Fish'	-1.69897	'Kovrižnychet al. Interdisciplinary Toxicology. 2013; Vol. 6(2): 67–73'
'TiO2'	80	NaN	'48 h'	'Acute toxicity assay'	'LC50'	1600	0.02	'Danio rerio (eggs)'	'Fish'	-1.69897	'Kovrižnychet al. Interdisciplinary Toxicology. 2013; Vol. 6(2): 67–73'
'TiO2'	80	NaN	'96 h'	'embryo-larval bioassay'	'LC50'	500	0.00625	'Danio rerio (embryos)'	'Fish'	-2.20412	'Zhu et al., J. Environ. Sci. Health A Tox. Hazard Subst. Environ. Eng. 2008; 43 (3) 278-288'
'TiO2'	80	NaN	'84 h'	'embryo-larval bioassay'	'eC50'	500	0.00625	'Danio rerio (embryos)'	'Fish'	-2.20412	'Zhu et al., J. Environ. Sci. Health A Tox. Hazard Subst. Environ. Eng. 2008; 43 (3) 278-289'
'TiO2'	80	5	'48 h'	'Immobilization'	'ec50'	NaN	NaN	'Daphnia magna'	'Crustacean'	NaN	'Bondarenko et al. Nanotoxicology, 2016; 10(9): 1229–1242'
'TiO2'	80	NaN	'48 h'	'Immobilization'	'EC50'	300	0.00375	'Daphnia magna'	'Crustacean'	-2.42597	'Sovova et al., 2009, Proceedings,NANOCON Conference, Roznov , Czech Republic, pp 62‐71,'
'TiO2'	80	21	'72 h'	'Acute toxicity (immobilization)'	'LC50'	2.02	2.525e-05	'Daphnia magna (neonates)'	'Crustacean'	-4.59774	'Zhu et al. Chemosphere 2010; 78 (3) 209-216'
'TiO2'	80	21	'72 h'	'Acute toxicity (mortality)'	'EC50'	1.62	2.025e-05	'Daphnia magna (neonates)'	'Crustacean'	-4.69357	'Zhu et al. Chemosphere 2010; 78 (3) 209-216'
'TiO2'	80	21	'48 h'	'Acute toxicity (mortality)'	'EC50'	NaN	NaN	'Daphnia magna (neonates)'	'Crustacean'	NaN	'Zhu et al. Chemosphere 2010; 78 (3) 209-216'
'TiO2'	80	NaN	'48 h'	'Acute toxicity (mortality)'	'EC50'	500	0.00625	'Daphnia magna (neonates)'	'Crustacean'	-2.20412	'Zhu et al., J. Nanopart. Res. 2009; 11 (1) 67–75'
'TiO2'	80	NaN	'48 h'	'Mortality test assay'	'LC50'	20000	0.25	'Daphnia magna (neonates)'	'Crustacean'	-0.60206	'Heinlaan et al. Chemosphere 2008; 71 (7) 1308-1316'
'TiO2'	80	NaN	'2 h'	'luminescence inhbition'	'ec50'	20000	0.25	'E. coli AB1157'	'Bacteria'	-0.60206	'Ivansk et al Anal Bioanal Chem (2010) 398:701–716'
'TiO2'	80	NaN	'30 min'	'luminescence inhbition'	'ec50'	20000	0.25	'E. coli AB1157'	'Bacteria'	-0.60206	'Ivansk et al Anal Bioanal Chem (2010) 398:701–716'
'TiO2'	80	NaN	'30 min'	'luminescence inhbition'	'ec50'	20000	0.25	'E. coli AS391'	'Bacteria'	-0.60206	'Ivansk et al Anal Bioanal Chem (2010) 398:701–716'
'TiO2'	80	NaN	'2 h'	'luminescence inhbition'	'ec50'	20000	0.25	'E. coli AS393'	'Bacteria'	-0.60206	'Ivansk et al Anal Bioanal Chem (2010) 398:701–716'
'TiO2'	80	NaN	'30 min'	'luminescence inhbition'	'ec50'	20000	0.25	'E. coli JI130'	'Bacteria'	-0.60206	'Ivansk et al Anal Bioanal Chem (2010) 398:701–716'
'TiO2'	80	NaN	'2 h'	'luminescence inhbition'	'ec50'	20000	0.25	'E. coli JI131'	'Bacteria'	-0.60206	'Ivansk et al Anal Bioanal Chem (2010) 398:701–716'
'TiO2'	80	NaN	'30 min'	'luminescence inhbition'	'ec50'	20000	0.25	'E. coli JI131'	'Bacteria'	-0.60206	'Ivansk et al Anal Bioanal Chem (2010) 398:701–716'
'TiO2'	80	NaN	'2 h'	'luminescence inhbition'	'ec50'	20000	0.25	'E. coli JI132'	'Bacteria'	-0.60206	'Ivansk et al Anal Bioanal Chem (2010) 398:701–716'
'TiO2'	80	NaN	'30 min'	'luminescence inhbition'	'ec50'	20000	0.25	'E. coli JI132'	'Bacteria'	-0.60206	'Ivansk et al Anal Bioanal Chem (2010) 398:701–716'
'TiO2'	80	42	'30 min'	'Cell viability assay CFU'	'LC50'	579.549	0.00724436	'E.coli'	'Bacteria'	-2.14	'Pathakoti et al. Journal of Photochemistry and Photobiology B: Biology 130 (2014) 234–240'
'TiO2'	80	NaN	'2 h'	'Cytotoxicity assay'	'LD50'	1104	0.0138	'E.coli'	'Bacteria'	-1.86012	'Hu et al. Sci. Total Environ. 407 (2009) 3070–3072'
'TiO2'	80	5	'4 h'	'growth inhibition assay'	'ec50'	NaN	NaN	'Escherichia Coli'	'Bacteria'	NaN	'Bondarenko et al. Nanotoxicology, 2016; 10(9): 1229–1242'
'TiO2'	80	42.3	'30 min'	'Cytotoxicity assays'	'LC50'	583	0.0072875	'Escherichia Coli'	'Bacteria'	-2.13742	'Dasari et al. J Environ Sci, 2013;25(5):882-8'
'TiO2'	80	NaN	'24 h'	'MTT assay'	'ec50'	1000	0.0125	'Hacat'	'Human cells'	-1.90309	'Horie et al. Metallomics, 2012, 4, 350–360'
'TiO2'	80	NaN	'24 h'	'MTT assay'	'ec50'	1000	0.0125	'Hacat'	'Human cells'	-1.90309	'Horie et al. Metallomics, 2012, 4, 350–360'
'TiO2'	80	NaN	'24 h'	'MTT assay'	'ec50'	1000	0.0125	'Hacat'	'Human cells'	-1.90309	'Horie et al. Metallomics, 2012, 4, 350–360'
'TiO2'	80	42.3	'24 h'	'CytoTox-Glo Cytotoxicity Assay'	'LC50'	1389	0.0173625	'Hacat cells'	'Human cells'	-1.76039	'Gajewicz et al. Nanotoxicology, 2015;9(3):313-25'
'TiO2'	80	NaN	'24 h'	'Cellular proliferation colorimetric assay'	'LD 50'	1000	0.0125	'HeLa cells'	'Human cells'	-1.90309	'Lozano et al 2011 J. Phys.: Conf. Ser. 304 012046'
'TiO2'	80	NaN	'48 h'	'Cellular proliferation colorimetric assay'	'LD 50'	1000	0.0125	'HeLa cells'	'Human cells'	-1.90309	'Lozano et al 2011 J. Phys.: Conf. Ser. 304 012046'
'TiO2'	80	5	'24 h'	'MTT assay'	'ec50'	NaN	NaN	'human mesenchymal stem cells (MTT)'	'Human cells'	NaN	'Bondarenko et al. Nanotoxicology, 2016; 10(9): 1229–1242'
'TiO2'	80	NaN	'3 days'	'Phytotoxicity (root length)'	'EC50'	5000	0.0625	'Lactuca sativa'	'Plants'	-1.20412	'Wu et al. J Pet Environ Biotechnol, 2012, 3:126'
'TiO2'	80	NaN	'3 days'	'Seed germination'	'EC50'	1000	0.0125	'Lactuca sativa L.'	'Plants'	-1.90309	'Ko et al. Appl Microbiol Biotechnol (2014) 98:3295–3303'
'TiO2'	80	NaN	'4 days'	'growth inhibition assay'	'EC50'	1000	0.0125	'Lactuca sativa L.'	'Plants'	-1.90309	'Kong et al. Nanomaterials 2021, 11, 1653'
'TiO2'	80	5	'48 h'	'Membrane integrity'	'ec50'	NaN	NaN	'murine Fibroblasts (membrane integrity)'	'Mammalian cells'	NaN	'Bondarenko et al. Nanotoxicology, 2016; 10(9): 1229–1242'
'TiO2'	80	5	'24 h'	'WST-1'	'ec50'	NaN	NaN	'murine Fibroblasts BALB/c 3t3'	'Mammalian cells'	NaN	'Bondarenko et al. Nanotoxicology, 2016; 10(9): 1229–1242'
'TiO2'	80	NaN	'24 h'	'Cellular proliferation colorimetric assay'	'LD 50'	1000	0.0125	'NCl H460'	'Human cells'	-1.90309	'Lozano et al 2011 J. Phys.: Conf. Ser. 304 012046'
'TiO2'	80	NaN	'48 h'	'Cellular proliferation colorimetric assay'	'LD 50'	1000	0.0125	'NCl H460'	'Human cells'	-1.90309	'Lozano et al 2011 J. Phys.: Conf. Ser. 304 012046'
'TiO2'	80	NaN	'12 h'	'MTT assay'	'EC50'	NaN	NaN	'Neuro 2A cells'	'Mammalian cells'	NaN	'Jeng et al. ron Sci Health A Tox Hazard Subst Environ Eng. 2006;41(12):2699-711'
'TiO2'	80	NaN	'12 h'	'MTT assay'	'EC50'	NaN	NaN	'Neuro 2A cells'	'Mammalian cells'	NaN	'Jeng et al. ron Sci Health A Tox Hazard Subst Environ Eng. 2006;41(12):2699-711'
'TiO2'	80	5	'4 h'	'growth inhibition assay'	'ec50'	NaN	NaN	'Pseudomonas putida'	'Bacteria'	NaN	'Bondarenko et al. Nanotoxicology, 2016; 10(9): 1229–1242'
'TiO2'	80	NaN	'4 days'	'growth inhibition assay'	'EC50'	1000	0.0125	'Raphanus sativus'	'Plants'	-1.90309	'Kong et al. Nanomaterials 2021, 11, 1653'
'TiO2'	80	NaN	'3 days'	'Seed germination'	'EC50'	1000	0.0125	'Raphanus sativus L'	'Plants'	-1.90309	'Ko et al. Appl Microbiol Biotechnol (2014) 98:3295–3303'
'TiO2'	80	12.6	'24 h'	'ATP assay'	'EC50'	NaN	NaN	'RAW 2647 cells, ATP assay'	'Mammalian cells'	NaN	'Zhang et al. ACS Nano 2012, 6, 5, 4349–4368'
'TiO2'	80	12.6	'24 h'	'MTS assay'	'EC50'	NaN	NaN	'RAW 2647 cells, MTS assay'	'Mammalian cells'	NaN	'Zhang et al. ACS Nano 2012, 6, 5, 4349–4368'
'TiO2'	80	NaN	'24 h'	'metabolic activity (alamarBlue® assay'	'ec50'	NaN	NaN	'RTgutGC'	'Fish'	NaN	'Geppert et al. Environ. Sci.: Nano, 2021,8, 2249-2260'
'TiO2'	80	NaN	'8 h'	'Cell Viability CFU assay'	'EC50'	20000	0.25	'Saccharomyces cerevisiae S288C'	'Eukaryotes & Microalgae'	-0.60206	'Kasemets et al. Toxicol. In Vitro 2009; 23 (6) 1116-1122'
'TiO2'	80	NaN	'24 h'	'Cellular proliferation colorimetric assay'	'LD 50'	1000	0.0125	'SK- MES 1'	'Human cells'	-1.90309	'Lozano et al 2011 J. Phys.: Conf. Ser. 304 012046'
'TiO2'	80	NaN	'48 h'	'Cellular proliferation colorimetric assay'	'LD 50'	1000	0.0125	'SK- MES 1'	'Human cells'	-1.90309	'Lozano et al 2011 J. Phys.: Conf. Ser. 304 012046'
'TiO2'	80	5	'4 h'	'growth inhibition assay'	'ec50'	NaN	NaN	'Staphylococcus aureus'	'Bacteria'	NaN	'Bondarenko et al. Nanotoxicology, 2016; 10(9): 1229–1242'
'TiO2'	80	5	'24 h'	'Viability assay'	'ec50'	NaN	NaN	'Tetrahymena thermophila'	'Eukaryotes & Microalgae'	NaN	'Bondarenko et al. Nanotoxicology, 2016; 10(9): 1229–1242'
'TiO2'	80	12.2	'24 h'	'Viability assay'	'EC50'	52.62	0.00065775	'Tetrahymena thermophila'	'Eukaryotes & Microalgae'	-3.18194	'Aruoja et al Environ. Sci.: Nano, 2015,2, 630-644'
'TiO2'	80	NaN	'24 h'	'Mortality test assay'	'LC50'	20000	0.25	'Thamnocephalus platyurus'	'Crustacean'	-0.60206	'Heinlaan et al. Chemosphere 2008; 71 (7) 1308-1316'
'TiO2'	80	12.2	'24 h'	'MTT assay'	'IC50'	369.2	0.004615	'THP-1'	'Human cells'	-2.33583	'Lanone et al. Particle and Fibre Toxicology 2009, 6:14'
'TiO2'	80	12.2	'24 h'	'MTT assay'	'IC50'	432	0.0054	'THP-1'	'Human cells'	-2.26761	'Lanone et al. Particle and Fibre Toxicology 2009, 6:14'
'TiO2'	80	12.2	'24 h'	'MTT assay'	'IC50'	845.2	0.010565	'THP-1'	'Human cells'	-1.97613	'Lanone et al. Particle and Fibre Toxicology 2009, 6:14'
'TiO2'	80	12.2	'24 h'	'Neutral Red assay.'	'IC50'	95.97	0.00119962	'THP-1'	'Human cells'	-2.92095	'Lanone et al. Particle and Fibre Toxicology 2009, 6:29'
'TiO2'	80	12.2	'24 h'	'Neutral Red assay.'	'IC50'	1062	0.013275	'THP-1'	'Human cells'	-1.87697	'Lanone et al. Particle and Fibre Toxicology 2009, 6:29'
'TiO2'	80	12.2	'24 h'	'Neutral Red assay.'	'IC50'	220.5	0.00275625	'THP-1'	'Human cells'	-2.55968	'Lanone et al. Particle and Fibre Toxicology 2009, 6:29'
'TiO2'	80	39.9	'24 h'	'MTS assay'	'EC50'	4000	0.004	'THP-1 CELLS'	'Human cells'	-2.39794	'Jeong et al. Front Pharmacol. 2018 22;9:15.'
'TiO2'	80	5	'30 min'	'bioluminescence inhibition assay'	'ec50'	NaN	NaN	'Vibrio fischeri'	'Bacteria'	NaN	'Bondarenko et al. Nanotoxicology, 2016; 10(9): 1229–1242'
'TiO2'	80	NaN	'30 min'	'bioluminescence inhibition assay'	'EC50'	20000	0.25	'Vibrio fischeri'	'Bacteria'	-0.60206	'Heinlaan et al. Chemosphere 2008; 71 (7) 1308-1316'
'TiO2'	80	5	'96 h'	'Lethal malformations'	'ec50'	NaN	NaN	'zebrafish (danio rerio)'	'Fish'	NaN	'Bondarenko et al. Nanotoxicology, 2016; 10(9): 1229–1242'
'TiO2'	80	NaN	'20 h'	'Growth inhibition (PromoKine Cell Viability Kit)\'	'IC50'	NaN	NaN	'Tetrahymena Thermophila'	'Eukaryotes & Microalgae'	NaN	'Ud Daula et al., Journal of Environmental Science and Health, Part A (2013) 48, 1343–1348'
'TiO2'	80	NaN	'20 h'	'Cytotoxicity assay (WST-8)'	'EC50'	NaN	NaN	'Tetrahymena Thermophila'	'Eukaryotes & Microalgae'	NaN	'Ud Daula et al., Journal of Environmental Science and Health, Part A (2013) 48, 1343–1348'
'TiO2'	80	NaN	'40 h'	'Cytotoxicity assay (WST-8)'	'EC50'	NaN	NaN	'Tetrahymena Thermophila'	'Eukaryotes & Microalgae'	NaN	'Ud Daula et al., Journal of Environmental Science and Health, Part A (2013) 48, 1343–1348'
'TiO2'	80	21	'10 h'	'Activity inhibition'	'IC50'	1000	0.0125	'Saccharomyces cerevisae'	'Eukaryotes & Microalgae'	-1.90309	'Otero-González et al. / Chemosphere 93 (2013) 1201–1206'
'TiO2'	80	21	'10 h'	'Activity inhibition'	'IC50'	1000	0.0125	'Saccharomyces cerevisae'	'Eukaryotes & Microalgae'	-1.90309	'Otero-González et al. / Chemosphere 93 (2013) 1201–1206'
'TiO2'	80	21	'10 h'	'FungaLight kit, membrane damage assay'	'EC50'	1000	0.0125	'Saccharomyces cerevisae'	'Eukaryotes & Microalgae'	-1.90309	'Otero-González et al. / Chemosphere 93 (2013) 1201–1206'
'V2O3'	150	NaN	'30 min'	'Cell viability assay CFU'	'LC50'	49.6697	0.000331131	'E.coli'	'Bacteria'	-3.48	'Pathakoti et al. Journal of Photochemistry and Photobiology B: Biology 130 (2014) 234–240'
'V2O3'	150	NaN	'2 h'	'Cell viability assay CFU'	'EC50'	108.665	0.000724436	'E.coli'	'Bacteria'	-3.14	'Puzyn et al. Nature Nanotech 6, 175–178 (2011)'
'V2O3'	150	NaN	'24 h'	'CytoTox-Glo Cytotoxicity Assay'	'LC50'	855	0.0057	'Hacat cells'	'Human cells'	-2.24413	'Gajewicz et al. Nanotoxicology, 2015;9(3):313-25'
'W'	184	NaN	'48 h'	'Acute toxicity assay'	'LC50'	1600	0.00869565	'Danio rerio (adults)'	'Fish'	-2.0607	'Kovrižnychet al. Interdisciplinary Toxicology. 2013; Vol. 6(2): 67–73'
'W'	184	NaN	'48 h'	'Acute toxicity assay'	'LC50'	1600	0.00869565	'Danio rerio (eggs)'	'Fish'	-2.0607	'Kovrižnychet al. Interdisciplinary Toxicology. 2013; Vol. 6(2): 67–73'
'WO3'	232	30	'24 h'	'MTT assay'	'ec50'	1000	0.00431034	'A549'	'Human cells'	-2.36549	'Horie et al. Metallomics, 2012, 4, 350–360'
'WO3'	232	NaN	'48 h'	'Acute toxicity assay'	'LC50'	1600	0.00689655	'Danio rerio (eggs)'	'Fish'	-2.16137	'Kovrižnychet al. Interdisciplinary Toxicology. 2013; Vol. 6(2): 67–73'
'WO3'	232	NaN	'2 h'	'Cell Viability CFU assay'	'ec50'	2000	0.00862069	'E Coli'	'Bacteria'	-2.06446	'Kar et al. Chemosphere 264 (2021) 128428'
'WO3'	232	16.6	'24 h'	'growth inhibition assay'	'IC50'	NaN	NaN	'E.coli'	'Bacteria'	NaN	'Kaweeteerawat et al. Environ. Sci. Technol. 2015, 49, 1105−1112'
'WO3'	232	30	'24 h'	'MTT assay'	'ec50'	1000	0.00431034	'Hacat'	'Human cells'	-2.36549	'Horie et al. Metallomics, 2012, 4, 350–360'
'WO3'	232	NaN	'24 h'	'CytoTox-Glo Cytotoxicity Assay'	'LC50'	634	0.00273276	'Hacat cells'	'Human cells'	-2.5634	'Gajewicz et al. Nanotoxicology, 2015;9(3):313-25'
'Y2O3'	226	41.89	'24 h'	'CCK-8 cytotoxicity assay'	'EC50'	247.804	0.00109648	'A549 cells'	'Human cells'	-2.96	'Cao et al. Green Chem., 2020,22, 3512-3521'
'Y2O3'	226	32.7	'24 h'	'growth inhibition assay'	'IC50'	NaN	NaN	'E.coli'	'Bacteria'	NaN	'Kaweeteerawat et al. Environ. Sci. Technol. 2015, 49, 1105−1112'
'Y2O3'	226	NaN	'2 h'	'Cell viability assay CFU'	'EC50'	304.866	0.00134896	'E.coli'	'Bacteria'	-2.87	'Puzyn et al. Nature Nanotech 6, 175–178 (2011)'
'Y2O3'	226	33	'24 h'	'MTT assay'	'ec50'	1000	0.00442478	'Hacat'	'Human cells'	-2.35411	'Horie et al. Metallomics, 2012, 4, 350–360'
'Y2O3'	226	38	'24 h'	'CytoTox-Glo Cytotoxicity Assay'	'LC50'	1390	0.00615044	'Hacat cells'	'Human cells'	-2.21109	'Gajewicz et al. Nanotoxicology, 2015;9(3):313-25'
'Yb2O3'	394	99.85	'24 h'	'CCK-8 cytotoxicity assay'	'EC50'	556.54	0.00141254	'A549 cells'	'Human cells'	-2.85	'Cao et al. Green Chem., 2020,22, 3512-3521'
'Yb2O3'	394	11.7	'2 h'	'growth inhibition assay'	'IC50'	70	0.000177665	'Brassica napus'	'Plant'	-3.7504	'Ma et al. Chemosphere 2010; 78 (3) 273-279'
'Yb2O3'	394	12	'5 days'	'Root elongation'	'EC50'	182	0.000461929	'Cucumis sativus'	'Plants'	-3.33542	'Zhang et al., Environ. Sci. Technol. 2012, 46, 3, 1834–1841'
'Yb2O3'	394	61.7	'24 h'	'growth inhibition assay'	'IC50'	NaN	NaN	'E.coli'	'Bacteria'	NaN	'Kaweeteerawat et al. Environ. Sci. Technol. 2015, 49, 1105−1112'
'Zn'	65	35	'2 h'	'growth inhibition assay'	'IC50'	20	0.000307692	'Brassica napus'	'Plant'	-3.51188	'Lin et al. Environm. Pollut. 2007 150 (2) 243-250'
'Zn'	65	35	'2 h'	'growth inhibition assay'	'IC50'	50	0.000769231	'Raphanus sativus'	'Plants'	-3.11394	'Lin et al. Environm. Pollut. 2007 150 (2) 243-250'
'Zn'	65	40	'15 min'	'bioluminescence inhibition assay'	'EC50'	20.5	0.000315385	'Vibrio Fischeri'	'Bacteria'	-3.50116	'Zhang et al. Environ Monit Assess (2020) 192: 484'
'ZnO'	81	21	'24 h'	'MTT assay'	'ec50'	100	0.00123457	'A549'	'Human cells'	-2.90849	'Horie et al. Metallomics, 2012, 4, 350–360'
'ZnO'	81	21	'24 h'	'MTT assay'	'ec50'	100	0.00123457	'A549'	'Human cells'	-2.90849	'Horie et al. Metallomics, 2012, 4, 350–360'
'ZnO'	81	53.6	'24 h'	'MTT assay'	'IC50'	66.17	0.000816914	'a549'	'Human cells'	-3.08782	'Lanone et al. Particle and Fibre Toxicology 2009, 6:14'
'ZnO'	81	NaN	'24 h'	'Cellular proliferation colorimetric assay'	'LD 50'	250	0.00308642	'A549'	'Human cells'	-2.51055	'Lozano et al 2011 J. Phys.: Conf. Ser. 304 012046'
'ZnO'	81	NaN	'48 h'	'Cellular proliferation colorimetric assay'	'LD 50'	75	0.000925926	'A549'	'Human cells'	-3.03342	'Lozano et al 2011 J. Phys.: Conf. Ser. 304 012046'
'ZnO'	81	NaN	'216'	'resazurin fluorescence assay'	'ec50'	41.1	0.000507407	'A549'	'Human cells'	-3.29464	'Titma et al. Cytotechnology. 2016;68(6):2363-2377'
'ZnO'	81	NaN	'36 h'	'resazurin fluorescence assay'	'ec50'	42.8	0.000528395	'A549'	'Human cells'	-3.27704	'Titma et al. Cytotechnology. 2016;68(6):2363-2377'
'ZnO'	81	NaN	'60 h'	'resazurin fluorescence assay'	'ec50'	46	0.000567901	'A549'	'Human cells'	-3.24573	'Titma et al. Cytotechnology. 2016;68(6):2363-2377'
'ZnO'	81	NaN	'108'	'resazurin fluorescence assay'	'ec50'	46.8	0.000577778	'A549'	'Human cells'	-3.23824	'Titma et al. Cytotechnology. 2016;68(6):2363-2377'
'ZnO'	81	NaN	'12 h'	'resazurin fluorescence assay'	'ec50'	117.6	0.00145185	'A549'	'Human cells'	-2.83808	'Titma et al. Cytotechnology. 2016;68(6):2363-2377'
'ZnO'	81	NaN	'24 h'	'aBlue'	'IC50'	60	0.000740741	'A549'	'Human cells'	-3.13033	'Seiffert et al., 2012,Chem. Res. Toxicol., 25, 140–152'
'ZnO'	81	NaN	'24 h'	'Impedance'	'IC50'	60	0.000740741	'A549'	'Human cells'	-3.13033	'Seiffert et al., 2012,Chem. Res. Toxicol., 25, 140–152'
'ZnO'	81	NaN	'24 h'	'WST-1'	'IC50'	60	0.000740741	'A549'	'Human cells'	-3.13033	'Seiffert et al., 2012,Chem. Res. Toxicol., 25, 140–152'
'ZnO'	81	16.5	'24 h'	'MTS assay'	'EC50'	81	0.001	'A549 CELLS'	'Human cells'	-3	'Jeong et al. Front Pharmacol. 2018 22;9:15.'
'ZnO'	81	45.7	'24 h'	'Cytotoxicity (MTS)'	'ec50 (in SFM medium)'	50	0.000617284	'A549 cells'	'Human cells'	-3.20952	'Areecheewakul, et al. NanoImpact 18 (2020) 100214'
'ZnO'	81	45.7	'24 h'	'Cytotoxicity (MTS)'	'ec50 (in SCM medium)'	50	0.000617284	'A549 cells'	'Human cells'	-3.20952	'Areecheewakul, et al. NanoImpact 18 (2020) 100214'
'ZnO'	81	45.7	'24 h'	'Cytotoxicity (PI staining)'	'ec50 (in SFM medium)'	7.5	9.25926e-05	'A549 cells'	'Human cells'	-4.03342	'Areecheewakul, et al. NanoImpact 18 (2020) 100214'
'ZnO'	81	13.6	'4 h'	'growth inhibition assay'	'ec50'	14	0.00017284	'Bacillus subtilis'	'Bacteria'	-3.76236	'Bondarenko et al. Nanotoxicology, 2016; 10(9): 1229–1242'
'ZnO'	81	19.7	'24 h'	'NRU assay'	'IC50'	12.1	0.000149383	'Balb/c'	'Mammalian cells'	-3.8257	'Ivansk et al. Curr Top Med Chem., 2015;15(18):1914-29'
'ZnO'	81	NaN	'24 h'	'resazurin fluorescence assay'	'ec50'	11.2	0.000138272	'Balb/c 3T3'	'Mammalian cells'	-3.85927	'Titma et al. Cytotechnology. 2016;68(6):2363-2377'
'ZnO'	81	20	'24 h'	'Cell viability'	'EC50'	12.5	0.000154321	'BEAS-2B'	'Human cells'	-3.81158	'Huang et al. Materials 2010, 3, 4842-4859;'
'ZnO'	81	22.6	'24 h'	'ATP assay'	'EC50'	3.63078	4.48245e-05	'BEAS-2B cells, ATP assay'	'Human cells'	-4.34849	'Zhang et al. ACS Nano 2012, 6, 5, 4349–4368'
'ZnO'	81	22.6	'24 h'	'MTS assay'	'EC50'	5.24807	6.4791e-05	'BEAS-2B cells, MTS assay'	'Human cells'	-4.18849	'Zhang et al. ACS Nano 2012, 6, 5, 4349–4368'
'ZnO'	81	20	'2 h'	'growth inhibition assay'	'IC50'	20	0.000246914	'Brassica napus'	'Plant'	-3.60746	'Lin et al. Environm. Pollut. 2007 150 (2) 243-250'
'ZnO'	81	19.7	'24 h'	'NRU assay'	'IC50'	30.2	0.00037284	'Caco2'	'Human cells'	-3.42848	'Ivansk et al. Curr Top Med Chem., 2015;15(18):1914-29'
'ZnO'	81	NaN	'60 h'	'resazurin fluorescence assay'	'ec50'	52.4	0.000646914	'Caco2'	'Human cells'	-3.18915	'Titma et al. Cytotechnology. 2016;68(6):2363-2377'
'ZnO'	81	NaN	'36 h'	'resazurin fluorescence assay'	'ec50'	65.9	0.00081358	'Caco2'	'Human cells'	-3.0896	'Titma et al. Cytotechnology. 2016;68(6):2363-2377'
'ZnO'	81	8.35	'5 days'	'embryonic zebrafish bioassayA'	'LC50'	9.1	0.000112346	'Danio rerio (embryos)'	'Fish'	-3.94944	'Wehmas et al. Toxicology Reports 2 (2015) 702–717'
'ZnO'	81	8.35	'4 days'	'larval zebrafish bioassay'	'LC50'	3.5	4.32099e-05	'Danio rerio (embryos)'	'Fish'	-4.36442	'Wehmas et al. Toxicology Reports 2 (2015) 702–717'
'ZnO'	81	20	'96 h'	'embryo-larval bioassay'	'LC50'	1.78401	2.20249e-05	'Danio rerio (embryos)'	'Fish'	-4.65709	'Zhu et al., J. Environ. Sci. Health A Tox. Hazard Subst. Environ. Eng. 2008; 43 (3) 278-284'
'ZnO'	81	20	'84 h'	'embryo-larval bioassay'	'eC50'	2.05465	2.53661e-05	'Danio rerio (embryos)'	'Fish'	-4.59575	'Zhu et al., J. Environ. Sci. Health A Tox. Hazard Subst. Environ. Eng. 2008; 43 (3) 278-285'
'ZnO'	81	NaN	'120 h'	'Fish embryo survival'	'LC50'	4.289	5.29506e-05	'Danio rerio embryos'	'Fish'	-4.27613	'Lacave et al. Nanotechnology 27 (2016) 325102'
'ZnO'	81	NaN	'120 h'	'Fish embryo survival'	'LC50'	5.538	6.83704e-05	'Danio rerio embryos'	'Fish'	-4.16513	'Lacave et al. Nanotechnology 27 (2016) 325102'
'ZnO'	81	70	'48 h'	'acute immobilisation assay (Daphtoxkit)'	'EC50'	3.3	4.07407e-05	'daphnia magna'	'Crustacean'	-4.38997	'Blinova et al. / Environmental Pollution 158 (2010) 41–4744'
'ZnO'	81	70	'48 h'	'acute immobilisation assay (Daphtoxkit)'	'EC50'	9	0.000111111	'daphnia magna'	'Crustacean'	-3.95424	'Blinova et al. / Environmental Pollution 158 (2010) 41–4744'
'ZnO'	81	70	'48 h'	'acute immobilisation assay (Daphtoxkit)'	'EC50'	1.7	2.09877e-05	'daphnia magna'	'Crustacean'	-4.67804	'Blinova et al. / Environmental Pollution 158 (2010) 41–4744'
'ZnO'	81	70	'48 h'	'acute immobilisation assay (Daphtoxkit)'	'EC50'	2.8	3.45679e-05	'daphnia magna'	'Crustacean'	-4.46133	'Blinova et al. / Environmental Pollution 158 (2010) 41–4744'
'ZnO'	81	70	'48 h'	'acute immobilisation assay (Daphtoxkit)'	'EC50'	3.4	4.19753e-05	'daphnia magna'	'Crustacean'	-4.37701	'Blinova et al. / Environmental Pollution 158 (2010) 41–4744'
'ZnO'	81	NaN	'48 h'	'Immobilization'	'EC50'	2.6	3.20988e-05	'Daphnia magna'	'Crustacean'	-4.49351	'Sovova et al., 2009, Proceedings,NANOCON Conference, Roznov , Czech Republic, pp 62‐71,'
'ZnO'	81	20	'48 h'	'Acute toxicity (immobilization)'	'LC50'	1.50343	1.85608e-05	'Daphnia magna (neonates)'	'Crustacean'	-4.7314	'Zhu et al., J. Nanopart. Res. 2009; 11 (1) 67–75'
'ZnO'	81	20	'48 h'	'Acute toxicity (mortality)'	'EC50'	0.618883	7.64053e-06	'Daphnia magna (neonates)'	'Crustacean'	-5.11688	'Zhu et al., J. Nanopart. Res. 2009; 11 (1) 67–75'
'ZnO'	81	NaN	'48 h'	'Mortality test assay'	'LC50'	3.2	3.95062e-05	'Daphnia magna (neonates)'	'Crustacean'	-4.40334	'Heinlaan et al. Chemosphere 2008; 71 (7) 1308-1316'
'ZnO'	81	NaN	'2 h'	'luminescence inhbition'	'ec50'	67.2	0.00082963	'E. coli AB1157'	'Bacteria'	-3.08112	'Ivansk et al Anal Bioanal Chem (2010) 398:701–716'
'ZnO'	81	NaN	'30 min'	'luminescence inhbition'	'ec50'	183	0.00225926	'E. coli AB1157'	'Bacteria'	-2.64603	'Ivansk et al Anal Bioanal Chem (2010) 398:701–716'
'ZnO'	81	NaN	'30 min'	'luminescence inhbition'	'ec50'	13.4	0.000165432	'E. coli AS391'	'Bacteria'	-3.78138	'Ivansk et al Anal Bioanal Chem (2010) 398:701–716'
'ZnO'	81	NaN	'2 h'	'luminescence inhbition'	'ec50'	86.8	0.0010716	'E. coli AS393'	'Bacteria'	-2.96997	'Ivansk et al Anal Bioanal Chem (2010) 398:701–716'
'ZnO'	81	NaN	'2 h'	'luminescence inhbition'	'ec50'	89.1	0.0011	'E. coli JI130'	'Bacteria'	-2.95861	'Ivansk et al Anal Bioanal Chem (2010) 398:701–716'
'ZnO'	81	NaN	'30 min'	'luminescence inhbition'	'ec50'	234	0.00288889	'E. coli JI130'	'Bacteria'	-2.53927	'Ivansk et al Anal Bioanal Chem (2010) 398:701–716'
'ZnO'	81	NaN	'2 h'	'luminescence inhbition'	'ec50'	82.4	0.00101728	'E. coli JI131'	'Bacteria'	-2.99256	'Ivansk et al Anal Bioanal Chem (2010) 398:701–716'
'ZnO'	81	NaN	'30 min'	'luminescence inhbition'	'ec50'	196	0.00241975	'E. coli JI131'	'Bacteria'	-2.61623	'Ivansk et al Anal Bioanal Chem (2010) 398:701–716'
'ZnO'	81	NaN	'2 h'	'luminescence inhbition'	'ec50'	6.91	8.53086e-05	'E. coli JI132'	'Bacteria'	-4.06901	'Ivansk et al Anal Bioanal Chem (2010) 398:701–716'
'ZnO'	81	NaN	'30 min'	'luminescence inhbition'	'ec50'	22.6	0.000279012	'E. coli JI132'	'Bacteria'	-3.55438	'Ivansk et al Anal Bioanal Chem (2010) 398:701–716'
'ZnO'	81	22.6	'24 h'	'growth inhibition assay'	'IC50'	33	0.000407407	'E.coli'	'Bacteria'	-3.38997	'Kaweeteerawat et al. Environ. Sci. Technol. 2015, 49, 1105−1112'
'ZnO'	81	71	'30 min'	'Cell viability assay CFU'	'LC50'	0.128376	1.58489e-06	'E.coli'	'Bacteria'	-5.8	'Pathakoti et al. Journal of Photochemistry and Photobiology B: Biology 130 (2014) 234–240'
'ZnO'	81	NaN	'2 h'	'Cell viability assay CFU'	'EC50'	28.7399	0.000354813	'E.coli'	'Bacteria'	-3.45	'Puzyn et al. Nature Nanotech 6, 175–178 (2011)'
'ZnO'	81	NaN	'2 h'	'Cytotoxicity assay'	'LD50'	21.1	0.000260494	'E.coli'	'Bacteria'	-3.5842	'Hu et al. Sci. Total Environ. 407 (2009) 3070–3072'
'ZnO'	81	13.6	'4 h'	'growth inhibition assay'	'ec50'	67	0.00082716	'Escherichia Coli'	'Bacteria'	-3.08241	'Bondarenko et al. Nanotoxicology, 2016; 10(9): 1229–1242'
'ZnO'	81	NaN	'24 h'	'MTT assay'	'LC50'	12.7	0.000165568	'gill cells'	'Fish'	-3.78102	'Katsumiti et al. Nanotoxicology. 2016;10(2):185-100'
'ZnO'	81	NaN	'24 h'	'MTT assay'	'LC50'	38.296	0.000487457	'gill cells'	'Fish'	-3.31206	'Katsumiti et al. Nanotoxicology. 2016;10(2):185-101'
'ZnO'	81	NaN	'24 h'	'MTT assay'	'LC50'	4.04	4.77778e-05	'gill cells'	'Fish'	-4.32077	'Katsumiti et al. Nanotoxicology. 2016;10(2):185-102'
'ZnO'	81	21	'24 h'	'MTT assay'	'ec50'	100	0.00123457	'Hacat'	'Human cells'	-2.90849	'Horie et al. Metallomics, 2012, 4, 350–360'
'ZnO'	81	21	'24 h'	'MTT assay'	'ec50'	100	0.00123457	'Hacat'	'Human cells'	-2.90849	'Horie et al. Metallomics, 2012, 4, 350–360'
'ZnO'	81	71	'24 h'	'CytoTox-Glo Cytotoxicity Assay'	'LC50'	39	0.000481481	'Hacat cells'	'Human cells'	-3.31742	'Gajewicz et al. Nanotoxicology, 2015;9(3):313-25'
'ZnO'	81	100	'24 h'	'WST-1 assay'	'IC50'	21.47	0.000265062	'HEK293'	'Human cells'	-3.57665	'Dua et al., 2011,Bull. Korean Chem. Soc. Vol. 32, No. 6 2051'
'ZnO'	81	100	'48 h'	'WST-1 assay'	'IC50'	20	0.000246914	'HEK293'	'Human cells'	-3.60746	'Dua et al., 2011,Bull. Korean Chem. Soc. Vol. 32, No. 6 2051'
'ZnO'	81	NaN	'24 h'	'Cellular proliferation colorimetric assay'	'LD 50'	125	0.00154321	'HeLa cells'	'Human cells'	-2.81158	'Lozano et al 2011 J. Phys.: Conf. Ser. 304 012046'
'ZnO'	81	NaN	'24 h'	'MTT assay'	'LC50'	39.484	0.000487457	'hemocytes'	'other'	-3.31206	'Katsumiti et al. Nanotoxicology. 2016;10(2):185-101'
'ZnO'	81	NaN	'24 h'	'MTT assay'	'LC50'	3.87	4.77778e-05	'hemocytes'	'other'	-4.32077	'Katsumiti et al. Nanotoxicology. 2016;10(2):185-102'
'ZnO'	81	13.6	'24 h'	'Membrane integrity'	'ec50'	1.9	2.34568e-05	'human mesenchymal stem cells'	'Human cells'	-4.62973	'Bondarenko et al. Nanotoxicology, 2016; 10(9): 1229–1242'
'ZnO'	81	13.6	'24 h'	'MTT assay'	'ec50'	16.3	0.000201235	'human mesenchymal stem cells (MTT)'	'Human cells'	-3.6963	'Bondarenko et al. Nanotoxicology, 2016; 10(9): 1229–1242'
'ZnO'	81	NaN	'3 days'	'Seed germination'	'EC50'	10.84	0.000133827	'Lactuca sativa L.'	'Plants'	-3.87346	'Ko et al. Appl Microbiol Biotechnol (2014) 98:3295–3303'
'ZnO'	81	NaN	'4 days'	'growth inhibition assay'	'EC50'	0.5	6.17284e-06	'Lactuca sativa L.'	'Plants'	-5.20952	'Kong et al. Nanomaterials 2021, 11, 1653'
'ZnO'	81	NaN	'4 days'	'growth inhibition assay'	'EC50'	1.31	1.61728e-05	'Lactuca sativa L.'	'Plants'	-4.79121	'Kong et al. Nanomaterials 2021, 11, 1653'
'ZnO'	81	20	'2 h'	'growth inhibition assay'	'IC50'	20	0.000246914	'Lolium perenne'	'Plants'	-3.60746	'Lin et al. Environm. Pollut. 2007 150 (2) 243-250'
'ZnO'	81	13.6	'48 h'	'Membrane integrity'	'ec50'	6.9	8.51852e-05	'murine Fibroblasts (membrane integrity)'	'Mammalian cells'	-4.06964	'Bondarenko et al. Nanotoxicology, 2016; 10(9): 1229–1242'
'ZnO'	81	13.6	'24 h'	'WST-1'	'ec50'	9.1	0.000112346	'murine Fibroblasts BALB/c 3t3'	'Mammalian cells'	-3.94944	'Bondarenko et al. Nanotoxicology, 2016; 10(9): 1229–1242'
'ZnO'	81	NaN	'12 h'	'MTT assay'	'EC50'	50	0.00246914	'Neuro 2A cells'	'Mammalian cells'	-2.60746	'Jeng et al. ron Sci Health A Tox Hazard Subst Environ Eng. 2006;41(12):2699-711'
'ZnO'	81	13.6	'4 h'	'growth inhibition assay'	'ec50'	69	0.000851852	'Pseudomonas putida'	'Bacteria'	-3.06964	'Bondarenko et al. Nanotoxicology, 2016; 10(9): 1229–1242'
'ZnO'	81	20	'2 h'	'growth inhibition assay'	'IC50'	50	0.000617284	'Raphanus sativus'	'Plants'	-3.20952	'Lin et al. Environm. Pollut. 2007 150 (2) 243-250'
'ZnO'	81	NaN	'4 days'	'growth inhibition assay'	'EC50'	1.23	1.51852e-05	'Raphanus sativus'	'Plants'	-4.81858	'Kong et al. Nanomaterials 2021, 11, 1653'
'ZnO'	81	NaN	'3 days'	'Seed germination'	'EC50'	46.54	0.000574568	'Raphanus sativus L'	'Plants'	-3.24066	'Ko et al. Appl Microbiol Biotechnol (2014) 98:3295–3303'
'ZnO'	81	22.6	'24 h'	'ATP assay'	'EC50'	8.12831	0.000100349	'RAW 2647 cells, ATP assay'	'Mammalian cells'	-3.99849	'Zhang et al. ACS Nano 2012, 6, 5, 4349–4368'
'ZnO'	81	22.6	'24 h'	'MTS assay'	'EC50'	17.378	0.000214543	'RAW 2647 cells, MTS assay'	'Mammalian cells'	-3.66849	'Zhang et al. ACS Nano 2012, 6, 5, 4349–4368'
'ZnO'	81	14	'24 h'	'metabolic activity (alamarBlue® assay'	'ec50'	100	0.00123457	'RTgutGC'	'Fish'	-2.90849	'Geppert et al. Environ. Sci.: Nano, 2021,8, 2249-2260'
'ZnO'	81	NaN	'8 h'	'Cell Viability CFU assay'	'EC50'	121	0.00149383	'Saccharomyces cerevisiae S288C'	'Eukaryotes & Microalgae'	-2.8257	'Kasemets et al. Toxicol. In Vitro 2009; 23 (6) 1116-1122'
'ZnO'	81	NaN	'24 h'	'Cell Viability CFU assay'	'EC50'	131	0.00161728	'Saccharomyces cerevisiae S288C'	'Eukaryotes & Microalgae'	-2.79121	'Kasemets et al. Toxicol. In Vitro 2009; 23 (6) 1116-1122'
'ZnO'	81	NaN	'24 h'	'Cellular proliferation colorimetric assay'	'LD 50'	200	0.00246914	'SK- MES 1'	'Human cells'	-2.60746	'Lozano et al 2011 J. Phys.: Conf. Ser. 304 012046'
'ZnO'	81	NaN	'48 h'	'Cellular proliferation colorimetric assay'	'LD 50'	100	0.00123457	'SK- MES 1'	'Human cells'	-2.90849	'Lozano et al 2011 J. Phys.: Conf. Ser. 304 012046'
'ZnO'	81	18	'96 h'	'growth inhibition assay'	'EC50'	1.34	1.65432e-05	'Soil bacterial community'	'Bacteria'	-4.78138	'Y. Zhai et al. Ecotoxicology and Environmental Safety 145 (2017) 349–358'
'ZnO'	81	43	'96 h'	'growth inhibition assay'	'EC50'	1.51	1.8642e-05	'Soil bacterial community'	'Bacteria'	-4.72951	'Y. Zhai et al. Ecotoxicology and Environmental Safety 145 (2017) 349–359'
'ZnO'	81	150	'96 h'	'growth inhibition assay'	'EC50'	1.65	2.03704e-05	'Soil bacterial community'	'Bacteria'	-4.691	'Y. Zhai et al. Ecotoxicology and Environmental Safety 145 (2017) 349–360'
'ZnO'	81	13.6	'4 h'	'growth inhibition assay'	'ec50'	16	0.000197531	'Staphylococcus aureus'	'Bacteria'	-3.70437	'Bondarenko et al. Nanotoxicology, 2016; 10(9): 1229–1242'
'ZnO'	81	70	'24 h'	'growth inhibition test (Protoxkit)'	'EC50'	9.4	0.000116049	'Tetrahymena thermophila'	'Eukaryotes & Microalgae'	-3.93536	'Blinova et al. / Environmental Pollution 158 (2010) 41–4744'
'ZnO'	81	70	'24 h'	'growth inhibition test (Protoxkit)'	'EC50'	16.4	0.000202469	'Tetrahymena thermophila'	'Eukaryotes & Microalgae'	-3.69364	'Blinova et al. / Environmental Pollution 158 (2010) 41–4744'
'ZnO'	81	70	'24 h'	'growth inhibition test (Protoxkit)'	'EC50'	12.4	0.000153086	'Tetrahymena thermophila'	'Eukaryotes & Microalgae'	-3.81506	'Blinova et al. / Environmental Pollution 158 (2010) 41–4744'
'ZnO'	81	70	'24 h'	'growth inhibition test (Protoxkit)'	'EC50'	26.5	0.00032716	'Tetrahymena thermophila'	'Eukaryotes & Microalgae'	-3.48524	'Blinova et al. / Environmental Pollution 158 (2010) 41–4744'
'ZnO'	81	70	'24 h'	'acute mortality test(Thamnotoxkit)'	'LC50'	1.1	1.35802e-05	'Thamnocephalus platyurus'	'Crustacean'	-4.86709	'Blinova et al. / Environmental Pollution 158 (2010) 41–4744'
'ZnO'	81	70	'24 h'	'acute mortality test(Thamnotoxkit)'	'LC50'	6	7.40741e-05	'Thamnocephalus platyurus'	'Crustacean'	-4.13033	'Blinova et al. / Environmental Pollution 158 (2010) 41–4744'
'ZnO'	81	70	'24 h'	'acute mortality test(Thamnotoxkit)'	'LC50'	3.6	4.44444e-05	'Thamnocephalus platyurus'	'Crustacean'	-4.35218	'Blinova et al. / Environmental Pollution 158 (2010) 41–4744'
'ZnO'	81	70	'24 h'	'acute mortality test(Thamnotoxkit)'	'LC50'	1.5	1.85185e-05	'Thamnocephalus platyurus'	'Crustacean'	-4.73239	'Blinova et al. / Environmental Pollution 158 (2010) 41–4744'
'ZnO'	81	70	'24 h'	'acute mortality test(Thamnotoxkit)'	'LC50'	5.3	6.54321e-05	'Thamnocephalus platyurus'	'Crustacean'	-4.18421	'Blinova et al. / Environmental Pollution 158 (2010) 41–4744'
'ZnO'	81	70	'24 h'	'acute mortality test(Thamnotoxkit)'	'LC50'	1.4	1.7284e-05	'Thamnocephalus platyurus'	'Crustacean'	-4.76236	'Blinova et al. / Environmental Pollution 158 (2010) 41–4744'
'ZnO'	81	NaN	'24 h'	'Mortality test assay'	'LC50'	0.18	2.22222e-06	'Thamnocephalus platyurus'	'Crustacean'	-5.65321	'Heinlaan et al. Chemosphere 2008; 71 (7) 1308-1316'
'ZnO'	81	53.6	'24 h'	'MTT assay'	'IC50'	1.66	2.04938e-05	'THP-1'	'Human cells'	-4.68838	'Lanone et al. Particle and Fibre Toxicology 2009, 6:14'
'ZnO'	81	53.6	'24 h'	'MTT assay'	'IC50'	4.05	5e-05	'THP-1'	'Human cells'	-4.30103	'Lanone et al. Particle and Fibre Toxicology 2009, 6:14'
'ZnO'	81	53.6	'24 h'	'Neutral Red assay.'	'IC50'	2.08	2.5679e-05	'THP-1'	'Human cells'	-4.59042	'Lanone et al. Particle and Fibre Toxicology 2009, 6:29'
'ZnO'	81	53.6	'24 h'	'Neutral Red assay.'	'IC50'	81.22	0.00100272	'THP-1'	'Human cells'	-2.99882	'Lanone et al. Particle and Fibre Toxicology 2009, 6:29'
'ZnO'	81	16.5	'24 h'	'MTS assay'	'EC50'	97.2	0.0012	'THP-1 CELLS'	'Human cells'	-2.92082	'Jeong et al. Front Pharmacol. 2018 22;9:15.'
'ZnO'	81	13.6	'30 min'	'bioluminescence inhibition assay'	'ec50'	8.3	0.000102469	'Vibrio fischeri'	'Bacteria'	-3.98941	'Bondarenko et al. Nanotoxicology, 2016; 10(9): 1229–1242'
'ZnO'	81	40	'15 min'	'bioluminescence inhibition assay'	'EC50'	11.6	0.00014321	'Vibrio Fischeri'	'Bacteria'	-3.84403	'Zhang et al. Environ Monit Assess (2020) 192: 484'
'ZnO'	81	NaN	'30 min'	'bioluminescence inhibition assay'	'ec50'	4.8	5.92593e-05	'Vibrio fischieri'	'Bacteria'	-4.22724	'Mortimer et al. Toxicology in Vitro 22 (2008) 1412–1417'
'ZnO'	81	20	'6 h'	'Cytotoxicity assay'	'EC50'	8.83	0.000109012	'Saccharomyces cerevisae'	'Eukaryotes & Microalgae'	-3.96252	'Zhang et al., J Nanopart Res (2016) 18 (2), 372'
'ZnO'	81	20	'48 h'	'Cytotoxicity assay'	'EC50'	3.13	3.8642e-05	'Saccharomyces cerevisae'	'Eukaryotes & Microalgae'	-4.41294	'Zhang et al., J Nanopart Res (2016) 18 (2), 372'
'ZrO2'	123	32	'24 h'	'MTT assay'	'IC50'	911.2	0.00740813	'a549'	'Human cells'	-2.13029	'Lanone et al. Particle and Fibre Toxicology 2009, 6:14'
'ZrO2'	123	32	'24 h'	'MTT assay'	'IC50'	82.88	0.000673821	'a549'	'Human cells'	-3.17146	'Lanone et al. Particle and Fibre Toxicology 2009, 6:14'
'ZrO2'	123	NaN	'24 h'	'MTT assay'	'ec50'	1000	0.00813008	'A549'	'Human cells'	-2.08991	'Horie et al. Metallomics, 2012, 4, 350–360'
'ZrO2'	123	19.87	'24 h'	'CCK-8 cytotoxicity assay'	'EC50'	1202	0.00977237	'A549 cells'	'Human cells'	-2.01	'Cao et al. Green Chem., 2020,22, 3512-3521'
'ZrO2'	123	27	'30 min'	'Cell viability assay CFU'	'LC50'	323.523	0.00263027	'E.coli'	'Bacteria'	-2.58	'Pathakoti et al. Journal of Photochemistry and Photobiology B: Biology 130 (2014) 234–240'
'ZrO2'	123	40.1	'24 h'	'growth inhibition assay'	'IC50'	500	0.00406504	'E.coli'	'Bacteria'	-2.39094	'Kaweeteerawat et al. Environ. Sci. Technol. 2015, 49, 1105−1112'
'ZrO2'	123	NaN	'2 h'	'Cell viability assay CFU'	'EC50'	870.773	0.00707946	'E.coli'	'Bacteria'	-2.15	'Puzyn et al. Nature Nanotech 6, 175–178 (2011)'
'ZrO2'	123	46.7	'24 h'	'CytoTox-Glo Cytotoxicity Assay'	'LC50'	1188	0.00965854	'Hacat cells'	'Human cells'	-2.01509	'Gajewicz et al. Nanotoxicology, 2015;9(3):313-25'
'ZrO2'	123	40.1	'24 h'	'ATP assay'	'EC50'	NaN	NaN	'RAW 2647 cells, ATP assay'	'Mammalian cells'	NaN	'Zhang et al. ACS Nano 2012, 6, 5, 4349–4368'
'ZrO2'	123	40.1	'24 h'	'MTS assay'	'EC50'	NaN	NaN	'RAW 2647 cells, MTS assay'	'Mammalian cells'	NaN	'Zhang et al. ACS Nano 2012, 6, 5, 4349–4368'
'ZrO2'	123	32	'24 h'	'MTT assay'	'IC50'	570.6	0.00463902	'THP-1'	'Human cells'	-2.33357	'Lanone et al. Particle and Fibre Toxicology 2009, 6:14'
'ZrO2'	123	NaN	'10 h'	'Activity inhibition'	'IC50'	1000	0.00813008	'Saccharomyces cerevisae'	'Eukaryotes & Microalgae'	-2.08991	'Otero-González et al. / Chemosphere 93 (2013) 1201–1206'
'ZrO2'	123	NaN	'10 h'	'Activity inhibition'	'IC50'	1000	0.00813008	'Saccharomyces cerevisae'	'Eukaryotes & Microalgae'	-2.08991	'Otero-González et al. / Chemosphere 93 (2013) 1201–1206'
'ZrO2'	123	NaN	'10 h'	'FungaLight kit, membrane damage assay'	'EC50'	1000	0.00813008	'Saccharomyces cerevisae'	'Eukaryotes & Microalgae'	-2.08991	'Otero-González et al. / Chemosphere 93 (2013) 1201–1206'
Total dataset- Validation data
NP	Molar weight (g/mol)	Size	Exposure time	Assay	Endpoint	Value (mg/l	Value(mol/L)	Cell type	Cell group	Log(endpoint)	reference
'Ag'	108	50	'120 h'	'Acute toxicity (mortality)'	'LC50'	13.7117	0.00012696	'Danio rerio (embryos)'	'Fish'	-3.89633	'Bar-Ilan et al. Small 2009; 5 (16) 1897-1910'
'Ag'	108	26.6	'48 h'	'static renewal assay'	'LC50'	7.2	6.66667e-05	'Danio rerio (juvenile)'	'Fish'	-4.17609	'Griffit et al. Environm. Toxicol. Chem. 2008; 27 (9) 1972–1978'
'Ag'	108	10	'48 h'	'Mortality test assay'	'LC50'	0.004	3.7037e-08	'Daphnia magna'	'Crustacean'	-7.43136	'Hoheisel et al. 2012, Environ. Toxicol. Chem. 31: 2557–2563'
'Ag'	108	10	'48 h'	'Mortality test assay'	'LC50'	0.01	9.25926e-08	'Daphnia magna'	'Crustacean'	-7.03342	'Hoheisel et al. 2012, Environ. Toxicol. Chem. 31: 2557–2563'
'Ag'	108	20	'48 h'	'Mortality test assay'	'LC50'	0.008	7.40741e-08	'Daphnia magna'	'Crustacean'	-7.13033	'Hoheisel et al. 2012, Environ. Toxicol. Chem. 31: 2557–2563'
'Ag'	108	NaN	'30 min'	'luminescence inhbition'	'ec50'	571	0.00528704	'E. coli AB1157'	'Bacteria'	-2.27679	'Ivansk et al Anal Bioanal Chem (2010) 398:701–716'
'Ag'	108	NaN	'2 h'	'luminescence inhbition'	'ec50'	3.79	3.50926e-05	'E. coli JI132'	'Bacteria'	-4.45478	'Ivansk et al Anal Bioanal Chem (2010) 398:701–716'
'Ag'	108	NaN	'30 min'	'luminescence inhbition'	'ec50'	17.9	0.000165741	'E. coli JI132'	'Bacteria'	-3.78057	'Ivansk et al Anal Bioanal Chem (2010) 398:701–716'
'Ag'	108	20.4	'24 h'	'Membrane integrity'	'ec50'	6.4	5.92593e-05	'human mesenchymal stem cells'	'Human cells'	-4.22724	'Bondarenko et al. Nanotoxicology, 2016; 10(9): 1229–1242'
'Ag'	108	50	'24 h'	'MTT'	'EC50'	47.6	0.000440741	'MCF‐7'	'Human cells'	-3.35582	'Liu et al. Nanotoxicology, 2010; 4(3): 319–330'
'Ag'	108	5	'24 h'	'MTT'	'EC50'	9.9	9.16667e-05	'SGC‐7901'	'Human cells'	-4.03779	'Liu et al. Nanotoxicology, 2010; 4(3): 319–330'
'Ag'	108	20	'24 h'	'MTT'	'EC50'	50.9	0.000471296	'SGC‐7901'	'Human cells'	-3.32671	'Liu et al. Nanotoxicology, 2010; 4(3): 319–330'
'Ag'	108	50	'24 h'	'MTT'	'EC50'	112	0.00103704	'SGC‐7901'	'Human cells'	-2.98421	'Liu et al. Nanotoxicology, 2010; 4(3): 319–330'
'Ag'	108	20.4	'4 h'	'growth inhibition assay'	'ec50'	5.2	4.81481e-05	'Staphylococcus aureus'	'Bacteria'	-4.31742	'Bondarenko et al. Nanotoxicology, 2016; 10(9): 1229–1242'
'Ag'	108	20.4	'96 h'	'Lethal malformations'	'ec50'	3	2.77778e-05	'zebrafish (danio rerio)'	'Fish'	-4.5563	'Bondarenko et al. Nanotoxicology, 2016; 10(9): 1229–1242'
'Ag2O'	233	NaN	'16 h'	'growth inhibition CFU assay'	'IC50'	18	7.72532e-05	'B. aerius'	'Bacteria'	-4.11208	'Negi et al. J Gen Appl Microbiol. 2013;59(1):83-8'
'Ag2O'	233	NaN	'16 h'	'growth inhibition CFU assay'	'IC50'	18	7.72532e-05	'B. circulans'	'Bacteria'	-4.11208	'Negi et al. J Gen Appl Microbiol. 2013;59(1):83-8'
'Al2O3'	102	28.15	'24 h'	'Cytotoxicity (PI staining)'	'ec50 (in SCM medium)'	NaN	NaN	'A549 cells'	'Human cells'	NaN	'Areecheewakul, et al. NanoImpact 18 (2020) 100214'
'Al2O3'	102	80	'48 h'	'Acute toxicity (immobilization)'	'LC50'	500	0.00490196	'Daphnia magna (neonates)'	'Crustacean'	-2.30963	'Zhu et al., J. Nanopart. Res. 2009; 11 (1) 67–75'
'Al2O3'	102	55	'30 min'	'Cell viability assay CFU'	'LC50'	387.793	0.00380189	'E.coli'	'Bacteria'	-2.42	'Pathakoti et al. Journal of Photochemistry and Photobiology B: Biology 130 (2014) 234–240'
'Al2O3'	102	NaN	'2 h'	'Cytotoxicity assay'	'LD50'	326.1	0.00319706	'E.coli'	'Bacteria'	-2.49525	'Hu et al. Sci. Total Environ. 407 (2009) 3070–3072'
'Al2O3'	102	31	'24 h'	'MTT assay'	'ec50'	1000	0.00980392	'Hacat'	'Human cells'	-2.0086	'Horie et al. Metallomics, 2012, 4, 350–360'
'Bi2O3'	466	149	'24 h'	'NRU assay'	'LC50'	75	0.000160944	'A549'	'Human cells'	-3.79332	'Abudayyak et al. / Chemosphere 169 (2017) 117e123118'
'Bi2O3'	466	149	'24 h'	'MTT'	'LC50'	100	0.000214592	'Caco-2'	'Human cells'	-3.66839	'Abudayyak et al. / Chemosphere 169 (2017) 117e123118'
'Bi2O3'	466	NaN	'48 h'	'Acute toxicity assay'	'LC50'	1600	0.00343348	'Danio rerio (adults)'	'Fish'	-2.46427	'Kovrižnychet al. Interdisciplinary Toxicology. 2013; Vol. 6(2): 67–73'
'Bi2O3'	466	NaN	'2 h'	'Cell viability assay CFU'	'EC50'	705.32	0.00151356	'E.coli'	'Bacteria'	-2.82	'Puzyn et al. Nature Nanotech 6, 175–178 (2011)'
'CeO2'	172	NaN	'24 h'	'Cellular proliferation colorimetric assay'	'LD 50'	1000	0.00581395	'A549'	'Human cells'	-2.23553	'Lozano et al 2011 J. Phys.: Conf. Ser. 304 012046'
'CeO2'	172	15.38	'24 h'	'CCK-8 cytotoxicity assay'	'EC50'	1885.94	0.0109648	'A549 cells'	'Human cells'	-1.96	'Cao et al. Green Chem., 2020,22, 3512-3521'
'CeO2'	172	14	'24 h'	'MTT assay'	'ec50'	1000	0.00581395	'Hacat'	'Human cells'	-2.23553	'Horie et al. Metallomics, 2012, 4, 350–360'
'CeO2'	172	NaN	'24 h'	'Cellular proliferation colorimetric assay'	'LD 50'	1000	0.00581395	'NCl H460'	'Human cells'	-2.23553	'Lozano et al 2011 J. Phys.: Conf. Ser. 304 012046'
'CeO2'	172	5.5	'48 h'	'Static acute toxicity'	'LC50'	1832.5	0.0106541	'P. multimicronucleatum'	'Eukaryotes & Microalgae'	-1.97248	'Li et al. 2012, Chem. Res. Toxicol, 25, 1675−1681'
'CeO2'	172	7.2	'2 h'	'growth inhibition assay'	'IC50'	1000	0.00581395	'Raphanus sativus'	'Plants'	-2.23553	'Ma et al. Chemosphere 2010; 78 (3) 273-279'
'CeO2'	172	NaN	'24 h'	'Cellular proliferation colorimetric assay'	'LD 50'	1000	0.00581395	'SK- MES 1'	'Human cells'	-2.23553	'Lozano et al 2011 J. Phys.: Conf. Ser. 304 012046'
'CeO2'	172	NaN	'48 h'	'Cellular proliferation colorimetric assay'	'LD 50'	1000	0.00581395	'SK- MES 1'	'Human cells'	-2.23553	'Lozano et al 2011 J. Phys.: Conf. Ser. 304 012046'
'Co'	59	20	'24 h'	'Neutral Red assay.'	'IC50'	241.6	0.00409492	'a549'	'Human cells'	-2.38776	'Lanone et al. Particle and Fibre Toxicology 2009, 6:27'
'Co'	59	20	'24 h'	'MTT assay'	'IC50'	69.6	0.00117966	'THP-1'	'Human cells'	-2.92824	'Lanone et al. Particle and Fibre Toxicology 2009, 6:14'
'Co3O4'	241	NaN	'60 h'	'resazurin fluorescence assay'	'ec50'	109.8	0.000455602	'A549'	'Human cells'	-3.34141	'Titma et al. Cytotechnology. 2016;68(6):2363-2377'
'Co3O4'	241	22.36	'24 h'	'CCK-8 cytotoxicity assay'	'EC50'	264.251	0.00109648	'A549 cells'	'Human cells'	-2.96	'Cao et al. Green Chem., 2020,22, 3512-3521'
'Co3O4'	241	10	'24 h'	'ATP assay'	'EC50'	22.3872	9.2893e-05	'RAW 2647 cells, ATP assay'	'Mammalian cells'	-4.03202	'Zhang et al. ACS Nano 2012, 6, 5, 4349–4368'
'CoO'	75	75	'24 h'	'MTS assay'	'EC50'	157.5	0.0021	'A549 CELLS'	'Human cells'	-2.67778	'Jeong et al. Front Pharmacol. 2018 22;9:15.'
'CoO'	75	NaN	'2 h'	'Cell viability assay CFU'	'EC50'	23.1772	0.00030903	'E.coli'	'Bacteria'	-3.51	'Puzyn et al. Nature Nanotech 6, 175–178 (2011)'
'CoO'	75	NaN	'24 h'	'CytoTox-Glo Cytotoxicity Assay'	'LC50'	110	0.00146667	'Hacat cells'	'Human cells'	-2.83367	'Gajewicz et al. Nanotoxicology, 2015;9(3):313-25'
'Cr2O3'	152	47	'30 min'	'Cell viability assay CFU'	'LC50'	1323.86	0.00870964	'E.coli'	'Bacteria'	-2.06	'Pathakoti et al. Journal of Photochemistry and Photobiology B: Biology 130 (2014) 234–240'
'Cr2O3'	152	60	'24 h'	'CytoTox-Glo Cytotoxicity Assay'	'LC50'	455	0.00299342	'Hacat cells'	'Human cells'	-2.52383	'Gajewicz et al. Nanotoxicology, 2015;9(3):313-25'
'Cu'	64	90	'24 h'	'MTT assay'	'IC50'	33.74	0.000527187	'a549'	'Human cells'	-3.27803	'Lanone et al. Particle and Fibre Toxicology 2009, 6:14'
'Cu'	64	NaN	'48 h'	'Acute toxicity assay'	'LC50'	4.2	6.5625e-05	'Danio rerio (adults)'	'Fish'	-4.18293	'Kovrižnychet al. Interdisciplinary Toxicology. 2013; Vol. 6(2): 67–73'
'Cu'	64	NaN	'24 h'	'Cell viability (MTT assay)'	'EC50'	91.7	0.00143281	'PC3'	'Human cells'	-2.84381	'Kim et al. Bull. Korean Chem. Soc. 2012, Vol. 33, No. 10'
'Cu'	64	22.9	'24 h'	'MTT assay'	'IC50'	1.65	2.57812e-05	'THP-1'	'Human cells'	-4.5887	'Lanone et al. Particle and Fibre Toxicology 2009, 6:14'
'Cu'	64	22.9	'24 h'	'Neutral Red assay.'	'IC50'	114.7	0.00179219	'THP-1'	'Human cells'	-2.74662	'Lanone et al. Particle and Fibre Toxicology 2009, 6:29'
'Cu'	64	90	'24 h'	'Neutral Red assay.'	'IC50'	0.39	6.09375e-06	'THP-1'	'Human cells'	-5.21512	'Lanone et al. Particle and Fibre Toxicology 2009, 6:29'
'Cu2O'	143	NaN	'24 h'	'Neutral Red assay.'	'IC50'	39.96	0.000279441	'a549'	'Human cells'	-3.55371	'Lanone et al. Particle and Fibre Toxicology 2009, 6:19'
'Cu2O'	143	NaN	'24 h'	'Neutral Red assay.'	'IC50'	8.15	5.6993e-05	'THP-1'	'Human cells'	-4.24418	'Lanone et al. Particle and Fibre Toxicology 2009, 6:29'
'CuO'	79.545	30	'24 h'	'Neutral Red assay.'	'IC50'	11.44	0.000143818	'a549'	'Human cells'	-3.84219	'Lanone et al. Particle and Fibre Toxicology 2009, 6:23'
'CuO'	79.545	30	'24 h'	'Neutral Red assay.'	'IC50'	20.84	0.00026199	'a549'	'Human cells'	-3.58172	'Lanone et al. Particle and Fibre Toxicology 2009, 6:24'
'CuO'	79.545	42	'18 h'	'Cytotoxicity'	'EC50'	20	0.00025143	'A549'	'Human cells'	-3.59958	'Karlsson et al. Chem. Res. Toxicol. 2008, Vol. 21, No. 9'
'CuO'	79.545	48	'24 h'	'MTT assay'	'ec50'	100	0.00125715	'A549'	'Human cells'	-2.90061	'Horie et al. Metallomics, 2012, 4, 350–360'
'CuO'	80	28.5	'24 h'	'MTS assay'	'EC50'	160	0.002	'A549 CELLS'	'Human cells'	-2.69897	'Jeong et al. Front Pharmacol. 2018 22;9:15.'
'CuO'	80	50.24	'24 h'	'Cytotoxicity (MTS)'	'ec50 (in SFM medium)'	5	6.25e-05	'A549 cells'	'Human cells'	-4.20412	'Areecheewakul, et al. NanoImpact 18 (2020) 100214'
'CuO'	79.545	11.9	'24 h'	'NRU assay'	'IC50'	17.7	0.000222516	'Balb/c'	'Mammalian cells'	-3.65264	'Ivansk et al. Curr Top Med Chem., 2015;15(18):1914-29'
'CuO'	79.545	NaN	'36 h'	'resazurin fluorescence assay'	'ec50'	38.6	0.00048526	'Caco2'	'Human cells'	-3.31403	'Titma et al. Cytotechnology. 2016;68(6):2363-2377'
'CuO'	79.545	24.5	'48 h'	'Immobilization'	'ec50'	0.9	1.13144e-05	'Daphnia magna'	'Crustacean'	-4.94637	'Bondarenko et al. Nanotoxicology, 2016; 10(9): 1229–1242'
'CuO'	79.545	30	'48 h'	'acute immobilisation assay (Daphtoxkit)'	'EC50'	92.7	0.00116538	'daphnia magna'	'Crustacean'	-2.93353	'Blinova et al. / Environmental Pollution 158 (2010) 41–4744'
'CuO'	79.545	30	'2 h'	'luminescence inhbition'	'ec50'	10.1	0.000126972	'E. coli AB1157'	'Bacteria'	-3.89629	'Ivansk et al Anal Bioanal Chem (2010) 398:701–716'
'CuO'	79.545	30	'30 min'	'luminescence inhbition'	'ec50'	11.4	0.000143315	'E. coli AS391'	'Bacteria'	-3.84371	'Ivansk et al Anal Bioanal Chem (2010) 398:701–716'
'CuO'	79.545	30	'2 h'	'luminescence inhbition'	'ec50'	7.45	9.36577e-05	'E. coli JI131'	'Bacteria'	-4.02846	'Ivansk et al Anal Bioanal Chem (2010) 398:701–716'
'CuO'	79.545	30	'2 h'	'luminescence inhbition'	'ec50'	3.25	4.08574e-05	'E. coli JI132'	'Bacteria'	-4.38873	'Ivansk et al Anal Bioanal Chem (2010) 398:701–716'
'CuO'	80	NaN	'2 h'	'Cytotoxicity assay'	'LD50'	64.5	0.00080625	'E.coli'	'Bacteria'	-3.09353	'Hu et al. Sci. Total Environ. 407 (2009) 3070–3072'
'CuO'	79.545	NaN	'3 days'	'Seed germination'	'EC50'	0.46	5.78289e-06	'Lactuca sativa L.'	'Plants'	-5.23786	'Ko et al. Appl Microbiol Biotechnol (2014) 98:3295–3303'
'CuO'	80	NaN	'4 days'	'growth inhibition assay'	'EC50'	1.28	1.6e-05	'Lactuca sativa L.'	'Plants'	-4.79588	'Kong et al. Nanomaterials 2021, 11, 1653'
'CuO'	79.545	24.5	'24 h'	'WST-1'	'ec50'	0.7	8.80005e-06	'murine Fibroblasts BALB/c 3t3'	'Mammalian cells'	-5.05551	'Bondarenko et al. Nanotoxicology, 2016; 10(9): 1229–1242'
'CuO'	80	NaN	'4 days'	'growth inhibition assay'	'EC50'	0.35	4.375e-06	'Raphanus sativus'	'Plants'	-5.35902	'Kong et al. Nanomaterials 2021, 11, 1653'
'CuO'	79.545	NaN	'3 days'	'Phytotoxicity (root length)'	'EC50'	297	0.00373374	'Raphanus sativus'	'Plants'	-2.42786	'Wu et al. J Pet Environ Biotechnol, 2012, 3:126'
'CuO'	79.545	25	'24 h'	'metabolic activity (alamarBlue® assay'	'ec50'	5.95	7.48004e-05	'RTgutGC'	'Fish'	-4.1261	'Geppert et al. Environ. Sci.: Nano, 2021,8, 2249-2260'
'CuO'	80	30	'24 h'	'Cell Viability CFU assay'	'EC50'	13.4	0.0001675	'Saccharomyces cerevisiae S288C'	'Eukaryotes & Microalgae'	-3.77599	'Kasemets et al. Toxicol. In Vitro 2009; 23 (6) 1116-1122'
'CuO'	79.545	30	'24 h'	'Neutral Red assay.'	'IC50'	4.98	6.26061e-05	'THP-1'	'Human cells'	-4.20338	'Lanone et al. Particle and Fibre Toxicology 2009, 6:29'
'CuO'	79.545	24.5	'96 h'	'Lethal malformations'	'ec50'	1.6	2.01144e-05	'zebrafish (danio rerio)'	'Fish'	-4.69649	'Bondarenko et al. Nanotoxicology, 2016; 10(9): 1229–1242'
'Fe2O3'	160	12.3	'24 h'	'MTS assay'	'EC50'	NaN	NaN	'BEAS-2B cells, MTS assay'	'Human cells'	NaN	'Zhang et al. ACS Nano 2012, 6, 5, 4349–4368'
'Fe2O3'	160	NaN	'48 h'	'Acute toxicity assay'	'LC50'	1600	0.01	'Danio rerio (adults)'	'Fish'	-2	'Kovrižnychet al. Interdisciplinary Toxicology. 2013; Vol. 6(2): 67–73'
'Fe2O3'	160	12.3	'24 h'	'growth inhibition assay'	'IC50'	NaN	NaN	'E.coli'	'Bacteria'	NaN	'Kaweeteerawat et al. Environ. Sci. Technol. 2015, 49, 1105−1112'
'Fe2O3'	160	68	'30 min'	'Cell viability assay CFU'	'LC50'	636.971	0.00398107	'E.coli'	'Bacteria'	-2.4	'Pathakoti et al. Journal of Photochemistry and Photobiology B: Biology 130 (2014) 234–240'
'Fe2O3'	160	32	'24 h'	'CytoTox-Glo Cytotoxicity Assay'	'LC50'	1483	0.00926875	'Hacat cells'	'Human cells'	-2.03298	'Gajewicz et al. Nanotoxicology, 2015;9(3):313-25'
'Fe2O3'	160	100	'48 h'	'WST-1 assay'	'IC50'	464	0.0029	'HEK293'	'Human cells'	-2.5376	'Dua et al., 2011,Bull. Korean Chem. Soc. Vol. 32, No. 6 2051'
'Fe2O3'	160	NaN	'48 h'	'Cellular proliferation colorimetric assay'	'LD 50'	1000	0.00625	'NCl H460'	'Human cells'	-2.20412	'Lozano et al 2011 J. Phys.: Conf. Ser. 304 012046'
'Fe2O3'	160	NaN	'3 days'	'Phytotoxicity (root length)'	'EC50'	5000	0.03125	'Raphanus sativus'	'Plants'	-1.50515	'Wu et al. J Pet Environ Biotechnol, 2012, 3:126'
'Fe2O3'	160	NaN	'3 days'	'Seed germination'	'EC50'	1000	0.00625	'Raphanus sativus L'	'Plants'	-2.20412	'Ko et al. Appl Microbiol Biotechnol (2014) 98:3295–3303'
'Fe2O3'	160	NaN	'24 h'	'Cellular proliferation colorimetric assay'	'LD 50'	1000	0.00625	'SK- MES 1'	'Human cells'	-2.20412	'Lozano et al 2011 J. Phys.: Conf. Ser. 304 012046'
'Fe3o4'	232	6	'24 H'	'CCK-8'	'EC50'	NaN	NaN	'SK HEP 1'	'Human cells'	NaN	'Xie et al. International journal of Nanomedicine, 11, 2016, 3557—3570'
'Gd2O3'	362	NaN	'2 h'	'Cell Viability CFU assay'	'ec50'	1212	0.00334807	'E Coli'	'Bacteria'	-2.47521	'Kar et al. Chemosphere 264 (2021) 128428'
'HfO2'	210	100	'10 h'	'FungaLight kit, membrane damage assay'	'EC50'	1000	0.0047619	'Saccharomyces cerevisae'	'Eukaryotes & Microalgae'	-2.32222	'García-Saucedo et al. / Journal of Hazardous Materials 192 (2011) 1572–1579'
'In2O3'	278	60	'30 min'	'Cell viability assay CFU'	'LC50'	411.192	0.00147911	'E.coli'	'Bacteria'	-2.83	'Pathakoti et al. Journal of Photochemistry and Photobiology B: Biology 130 (2014) 234–240'
'In2O3'	278	626	'15 min'	'Microtox bioassay'	'ec50'	NaN	NaN	'Vibrio fischeri'	'Bacteria'	NaN	'Nguyen et al. Journal of Environmental Science and Health, 2020 Part A, 55:2, 168-178'
'La2O3'	326	59	'48 h'	'Acute immobilization'	'ec50'	500	0.00153374	'Daphnia magna'	'Crustacean'	-2.81425	'Balusamy et al. Environ. Sci.: Processes Impacts, 2015,17, 1265-1270'
'La2O3'	326	65	'30 min'	'Cell viability assay CFU'	'LC50'	3.57452	1.09648e-05	'E.coli'	'Bacteria'	-4.96	'Pathakoti et al. Journal of Photochemistry and Photobiology B: Biology 130 (2014) 234–240'
'La2O3'	326	NaN	'24 h'	'MTT assay'	'ec50'	NaN	NaN	'Hacat'	'Human cells'	NaN	'Horie et al. Metallomics, 2012, 4, 350–360'
'La2O3'	326	45.6	'24 h'	'CytoTox-Glo Cytotoxicity Assay'	'LC50'	443	0.0013589	'Hacat cells'	'Human cells'	-2.86681	'Gajewicz et al. Nanotoxicology, 2015;9(3):313-25'
'Mn2O3'	158	36.87	'24 h'	'CCK-8 cytotoxicity assay'	'EC50'	22.3181	0.000141254	'A549 cells'	'Human cells'	-3.85	'Cao et al. Green Chem., 2020,22, 3512-3521'
'Mn2O3'	158	51.5	'24 h'	'growth inhibition assay'	'IC50'	70	0.000443038	'E.coli'	'Bacteria'	-3.35356	'Kaweeteerawat et al. Environ. Sci. Technol. 2015, 49, 1105−1112'
'Mn3o4'	229	NaN	'60 h'	'resazurin fluorescence assay'	'ec50'	39.2	0.000171179	'A549'	'Human cells'	-3.76655	'Titma et al. Cytotechnology. 2016;68(6):2363-2377'
'Mn3o4'	229	NaN	'108'	'resazurin fluorescence assay'	'ec50'	20.7	9.0393e-05	'Caco2'	'Human cells'	-4.04387	'Titma et al. Cytotechnology. 2016;68(6):2363-2377'
'Ni'	59	6.1	'48 h'	'static renewal assay'	'LC50'	0.674	1.14237e-05	'Ceriodaphnia dubia (neonates)'	'Crustacean'	-4.94219	'Griffit et al. Environm. Toxicol. Chem. 2008; 27 (9) 1972–1978'
'Ni2O3'	165	140.6	'24 h'	'growth inhibition assay'	'IC50'	181	0.00109697	'E.coli'	'Bacteria'	-2.95981	'Kaweeteerawat et al. Environ. Sci. Technol. 2015, 49, 1105−1112'
'NiO'	75	NaN	'24 h'	'Cell viability'	'EC50'	25	0.000333333	'BEAS-2B'	'Human cells'	-3.47712	'Huang et al. Materials 2010, 3, 4842-4859;'
'NiO'	75	13.1	'24 h'	'growth inhibition assay'	'IC50'	NaN	NaN	'E.coli'	'Bacteria'	NaN	'Kaweeteerawat et al. Environ. Sci. Technol. 2015, 49, 1105−1112'
'NiO'	75	20	'24 h'	'CytoTox-Glo Cytotoxicity Assay'	'LC50'	242	0.00322667	'Hacat cells'	'Human cells'	-2.49125	'Gajewicz et al. Nanotoxicology, 2015;9(3):313-25'
'NiO'	75	30	'3 days'	'Seed germination'	'EC50'	17.17	0.000228933	'Lactuca sativa L.'	'Plants'	-3.64029	'Ko et al. Appl Microbiol Biotechnol (2014) 98:3295–3303'
'Sb2O3'	292	20.8	'24 h'	'NRU assay'	'IC50'	79.9	0.00027363	'A549'	'Human cells'	-3.56284	'Ivansk et al. Curr Top Med Chem., 2015;15(18):1914-29'
'Sb2O3'	292	NaN	'216'	'resazurin fluorescence assay'	'ec50'	22	7.53425e-05	'A549'	'Human cells'	-4.12296	'Titma et al. Cytotechnology. 2016;68(6):2363-2377'
'Sb2O3'	292	NaN	'24 h'	'resazurin fluorescence assay'	'ec50'	15.3	5.23973e-05	'Balb/c 3T3'	'Mammalian cells'	-4.28069	'Titma et al. Cytotechnology. 2016;68(6):2363-2377'
'Sb2O3'	292	NaN	'216'	'resazurin fluorescence assay'	'ec50'	48.2	0.000165068	'Caco2'	'Human cells'	-3.78234	'Titma et al. Cytotechnology. 2016;68(6):2363-2377'
'Sb2O3'	292	NaN	'48 h'	'TEER assay'	'ec50'	10	3.42466e-05	'Caco2'	'Human cells'	-4.46538	'Titma et al. Cytotechnology. 2016;68(6):2363-2377'
'Sb2O3'	292	84	'30 min'	'Cell viability assay CFU'	'LC50'	221.505	0.000758578	'E.coli'	'Bacteria'	-3.12	'Pathakoti et al. Journal of Photochemistry and Photobiology B: Biology 130 (2014) 234–240'
'Sb2O3'	292	11.8	'24 h'	'growth inhibition assay'	'IC50'	NaN	NaN	'E.coli'	'Bacteria'	NaN	'Kaweeteerawat et al. Environ. Sci. Technol. 2015, 49, 1105−1112'
'Sb2O3'	292	NaN	'24 h'	'CytoTox-Glo Cytotoxicity Assay'	'LC50'	1429	0.00489384	'Hacat cells'	'Human cells'	-2.31035	'Gajewicz et al. Nanotoxicology, 2015;9(3):313-25'
'SiO2'	60	212	'4 h'	'growth inhibition assay'	'ec50'	NaN	NaN	'Bacillus subtilis'	'Bacteria'	NaN	'Bondarenko et al. Nanotoxicology, 2016; 10(9): 1229–1242'
'SiO2'	60	12	'24 h'	'NRU assay'	'IC50'	NaN	NaN	'Balb/c'	'Mammalian cells'	NaN	'Ivansk et al. Curr Top Med Chem., 2015;15(18):1914-29'
'SiO2'	60	13.5	'24 h'	'MTS assay'	'EC50'	2.75423e+07	459.038	'BEAS-2B cells, MTS assay'	'Human cells'	2.66185	'Zhang et al. ACS Nano 2012, 6, 5, 4349–4368'
'SiO2'	60	NaN	'48 h'	'Acute toxicity assay'	'LC50'	1600	0.0266667	'Danio rerio (eggs)'	'Fish'	-1.57403	'Kovrižnychet al. Interdisciplinary Toxicology. 2013; Vol. 6(2): 67–73'
'SiO2'	60	15	'24 h'	'MTT assay'	'LC50'	NaN	NaN	'hemocytes'	'other'	NaN	'Katsumiti et al. Nanotoxicology. 2016;10(2):185-96'
'SiO2'	60	27	'24 h'	'MTT assay'	'LC50'	NaN	NaN	'hemocytes'	'other'	NaN	'Katsumiti et al. Nanotoxicology. 2016;10(2):185-99'
'SiO2'	60	212	'4 h'	'growth inhibition assay'	'ec50'	NaN	NaN	'Pseudomonas aeruginosa'	'Bacteria'	NaN	'Bondarenko et al. Nanotoxicology, 2016; 10(9): 1229–1242'
'SiO2'	60	212	'4 h'	'growth inhibition assay'	'ec50'	NaN	NaN	'Staphylococcus aureus'	'Bacteria'	NaN	'Bondarenko et al. Nanotoxicology, 2016; 10(9): 1229–1242'
'Sn'	119	NaN	'48 h'	'Acute toxicity assay'	'LC50'	800	0.00672269	'Danio rerio (eggs)'	'Fish'	-2.17246	'Kovrižnychet al. Interdisciplinary Toxicology. 2013; Vol. 6(2): 67–73'
'SnO2'	151	62.4	'24 h'	'growth inhibition assay'	'IC50'	500	0.00331126	'E.coli'	'Bacteria'	-2.48001	'Kaweeteerawat et al. Environ. Sci. Technol. 2015, 49, 1105−1112'
'SnO2'	151	NaN	'2 h'	'Cell viability assay CFU'	'EC50'	1475.63	0.00977237	'E.coli'	'Bacteria'	-2.01	'Puzyn et al. Nature Nanotech 6, 175–178 (2011)'
'TiO2'	80	NaN	'24 h'	'resazurin fluorescence assay'	'ec50'	NaN	NaN	'A549'	'Human cells'	NaN	'Titma et al. Cytotechnology. 2016;68(6):2363-2377'
'TiO2'	80	NaN	'36 h'	'resazurin fluorescence assay'	'ec50'	NaN	NaN	'A549'	'Human cells'	NaN	'Titma et al. Cytotechnology. 2016;68(6):2363-2377'
'TiO2'	80	NaN	'24 h'	'MTT'	'IC50'	NaN	NaN	'A549'	'Human cells'	NaN	'Seiffert et al., 2012,Chem. Res. Toxicol., 25, 140–152'
'TiO2'	80	NaN	'24 h'	'WST-1'	'IC50'	NaN	NaN	'A549'	'Human cells'	NaN	'Seiffert et al., 2012,Chem. Res. Toxicol., 25, 140–152'
'TiO2'	80	NaN	'24 h'	'aBlue'	'IC50'	NaN	NaN	'A549'	'Human cells'	NaN	'Seiffert et al., 2012,Chem. Res. Toxicol., 25, 140–152'
'TiO2'	80	NaN	'24 h'	'NRU assay'	'IC50'	NaN	NaN	'A549'	'Human cells'	NaN	'Seiffert et al., 2012,Chem. Res. Toxicol., 25, 140–152'
'TiO2'	80	NaN	'24 h'	'MTT assay'	'ec50'	1000	0.0125	'A549'	'Human cells'	-1.90309	'Horie et al. Metallomics, 2012, 4, 350–360'
'TiO2'	80	NaN	'24 h'	'MTT assay'	'ec50'	1000	0.0125	'A549'	'Human cells'	-1.90309	'Horie et al. Metallomics, 2012, 4, 350–360'
'TiO2'	80	39.9	'24 h'	'MTS assay'	'EC50'	4000	0.004	'A549 CELLS'	'Human cells'	-2.39794	'Jeong et al. Front Pharmacol. 2018 22;9:15.'
'TiO2'	80	NaN	'24 h'	'resazurin fluorescence assay'	'ec50'	NaN	NaN	'Balb/c 3T3'	'Mammalian cells'	NaN	'Titma et al. Cytotechnology. 2016;68(6):2363-2377'
'TiO2'	80	NaN	'36 h'	'resazurin fluorescence assay'	'ec50'	NaN	NaN	'Caco2'	'Human cells'	NaN	'Titma et al. Cytotechnology. 2016;68(6):2363-2377'
'TiO2'	80	NaN	'108'	'resazurin fluorescence assay'	'ec50'	NaN	NaN	'Caco2'	'Human cells'	NaN	'Titma et al. Cytotechnology. 2016;68(6):2363-2377'
'TiO2'	80	NaN	'24 h'	'resazurin fluorescence assay'	'ec50'	NaN	NaN	'Caco2'	'Human cells'	NaN	'Titma et al. Cytotechnology. 2016;68(6):2363-2377'
'TiO2'	80	NaN	'48 h'	'Acute toxicity (immobilization)'	'LC50'	500	0.00625	'Daphnia magna (neonates)'	'Crustacean'	-2.20412	'Zhu et al., J. Nanopart. Res. 2009; 11 (1) 67–75'
'TiO2'	80	NaN	'2 h'	'luminescence inhbition'	'ec50'	20000	0.25	'E. coli AS391'	'Bacteria'	-0.60206	'Ivansk et al Anal Bioanal Chem (2010) 398:701–716'
'TiO2'	80	NaN	'30 min'	'luminescence inhbition'	'ec50'	20000	0.25	'E. coli AS393'	'Bacteria'	-0.60206	'Ivansk et al Anal Bioanal Chem (2010) 398:701–716'
'TiO2'	80	NaN	'2 h'	'luminescence inhbition'	'ec50'	20000	0.25	'E. coli JI130'	'Bacteria'	-0.60206	'Ivansk et al Anal Bioanal Chem (2010) 398:701–716'
'TiO2'	80	12.6	'24 h'	'growth inhibition assay'	'IC50'	500	0.00625	'E.coli'	'Bacteria'	-2.20412	'Kaweeteerawat et al. Environ. Sci. Technol. 2015, 49, 1105−1112'
'TiO2'	80	NaN	'1.5 h'	'bioluminescence activity assay'	'EC50'	1000	0.0125	'E.coli'	'Bacteria'	-1.90309	'Ko et al. Appl Microbiol Biotechnol (2014) 98:3295–3303'
'TiO2'	80	NaN	'2 h'	'Cell viability assay CFU'	'EC50'	1455.76	0.018197	'E.coli'	'Bacteria'	-1.74	'Puzyn et al. Nature Nanotech 6, 175–178 (2011)'
'TiO2'	80	5	'24 h'	'Membrane integrity'	'ec50'	NaN	NaN	'human mesenchymal stem cells'	'Human cells'	NaN	'Bondarenko et al. Nanotoxicology, 2016; 10(9): 1229–1242'
'TiO2'	80	NaN	'4 days'	'growth inhibition assay'	'EC50'	1000	0.0125	'Lactuca sativa L.'	'Plants'	-1.90309	'Kong et al. Nanomaterials 2021, 11, 1653'
'TiO2'	80	5.1	'48 h'	'Static acute toxicity'	'LC50'	7215.2	0.09019	'P. multimicronucleatum'	'Eukaryotes & Microalgae'	-1.04484	'Li et al. 2012, Chem. Res. Toxicol, 25, 1675−1681'
'TiO2'	80	5	'4 h'	'growth inhibition assay'	'ec50'	NaN	NaN	'Pseudomonas aeruginosa'	'Bacteria'	NaN	'Bondarenko et al. Nanotoxicology, 2016; 10(9): 1229–1242'
'TiO2'	80	NaN	'3 days'	'Phytotoxicity (root length)'	'EC50'	5000	0.0625	'Raphanus sativus'	'Plants'	-1.20412	'Wu et al. J Pet Environ Biotechnol, 2012, 3:126'
'TiO2'	80	5	'-'	'WST-1'	'ec50'	NaN	NaN	'rat macrophages'	'Mammalian cells'	NaN	'Bondarenko et al. Nanotoxicology, 2016; 10(9): 1229–1242'
'TiO2'	80	NaN	'24 h'	'Cell Viability CFU assay'	'EC50'	20000	0.25	'Saccharomyces cerevisiae S288C'	'Eukaryotes & Microalgae'	-0.60206	'Kasemets et al. Toxicol. In Vitro 2009; 23 (6) 1116-1122'
'TiO2'	80	NaN	'40 h'	'Growth inhibition (PromoKine Cell Viability Kit)\'	'IC50'	NaN	NaN	'Tetrahymena Thermophila'	'Eukaryotes & Microalgae'	NaN	'Ud Daula et al., Journal of Environmental Science and Health, Part A (2013) 48, 1343–1348'
'TiO2'	80	NaN	'6 h'	'Cytotoxicity assay (WST-8)'	'EC50'	NaN	NaN	'Tetrahymena Thermophila'	'Eukaryotes & Microalgae'	NaN	'Ud Daula et al., Journal of Environmental Science and Health, Part A (2013) 48, 1343–1348'
'V2O3'	150	NaN	'48 h'	'MTT Assay'	'eC50'	20	0.000133333	'a549'	'Human cells'	-3.87506	'Wörle-Knirsch et al., Environ. Sci. Technol. 2007, 41, 1, 331–336'
'WO3'	232	40.08	'24 h'	'CCK-8 cytotoxicity assay'	'EC50'	1274.93	0.00549541	'A549 cells'	'Human cells'	-2.26	'Cao et al. Green Chem., 2020,22, 3512-3521'
'WO3'	232	NaN	'48 h'	'Acute toxicity assay'	'LC50'	1600	0.00689655	'Danio rerio (adults)'	'Fish'	-2.16137	'Kovrižnychet al. Interdisciplinary Toxicology. 2013; Vol. 6(2): 67–73'
'WO3'	232	10.6	'30 min'	'luminescence inhbition'	'EC50'	87.07	0.000375302	'Vibrio Fischeri'	'Bacteria'	-3.42562	'Aruoja et al Environ. Sci.: Nano, 2015,2, 630-644'
'Y2O3'	226	33	'24 h'	'MTT assay'	'ec50'	1000	0.00442478	'A549'	'Human cells'	-2.35411	'Horie et al. Metallomics, 2012, 4, 350–360'
'Y2O3'	226	38	'30 min'	'Cell viability assay CFU'	'LC50'	0.366529	1.62181e-06	'E.coli'	'Bacteria'	-5.79	'Pathakoti et al. Journal of Photochemistry and Photobiology B: Biology 130 (2014) 234–240'
'Zn'	65	35	'2 h'	'growth inhibition assay'	'IC50'	20	0.000307692	'Lolium perenne'	'Plants'	-3.51188	'Lin et al. Environm. Pollut. 2007 150 (2) 243-250'
'ZnO'	81	19.7	'24 h'	'NRU assay'	'IC50'	24.9	0.000307407	'A549'	'Human cells'	-3.51229	'Ivansk et al. Curr Top Med Chem., 2015;15(18):1914-29'
'ZnO'	81	53.6	'24 h'	'MTT assay'	'IC50'	34.31	0.00042358	'a549'	'Human cells'	-3.37306	'Lanone et al. Particle and Fibre Toxicology 2009, 6:14'
'ZnO'	81	NaN	'24 h'	'MTT'	'IC50'	60	0.000740741	'A549'	'Human cells'	-3.13033	'Seiffert et al., 2012,Chem. Res. Toxicol., 25, 140–152'
'ZnO'	81	NaN	'24 h'	'NRU assay'	'IC50'	60	0.000740741	'A549'	'Human cells'	-3.13033	'Seiffert et al., 2012,Chem. Res. Toxicol., 25, 140–152'
'ZnO'	81	39.05	'24 h'	'CCK-8 cytotoxicity assay'	'EC50'	131.367	0.00162181	'A549 cells'	'Human cells'	-2.79	'Cao et al. Green Chem., 2020,22, 3512-3521'
'ZnO'	81	45.7	'24 h'	'Cytotoxicity (PI staining)'	'ec50 (in SCM medium)'	75	0.000925926	'A549 cells'	'Human cells'	-3.03342	'Areecheewakul, et al. NanoImpact 18 (2020) 100214'
'ZnO'	81	NaN	'216'	'resazurin fluorescence assay'	'ec50'	61.2	0.000755556	'Caco2'	'Human cells'	-3.12173	'Titma et al. Cytotechnology. 2016;68(6):2363-2377'
'ZnO'	81	NaN	'108'	'resazurin fluorescence assay'	'ec50'	62.5	0.000771605	'Caco2'	'Human cells'	-3.11261	'Titma et al. Cytotechnology. 2016;68(6):2363-2377'
'ZnO'	81	13.6	'48 h'	'Immobilization'	'ec50'	1.87	2.30864e-05	'Daphnia magna'	'Crustacean'	-4.63664	'Bondarenko et al. Nanotoxicology, 2016; 10(9): 1229–1242'
'ZnO'	81	70	'48 h'	'acute immobilisation assay (Daphtoxkit)'	'EC50'	3.5	4.32099e-05	'daphnia magna'	'Crustacean'	-4.36442	'Blinova et al. / Environmental Pollution 158 (2010) 41–4744'
'ZnO'	81	NaN	'2 h'	'luminescence inhbition'	'ec50'	5.54	6.83951e-05	'E. coli AS391'	'Bacteria'	-4.16498	'Ivansk et al Anal Bioanal Chem (2010) 398:701–716'
'ZnO'	81	NaN	'30 min'	'luminescence inhbition'	'ec50'	171	0.00211111	'E. coli AS393'	'Bacteria'	-2.67549	'Ivansk et al Anal Bioanal Chem (2010) 398:701–716'
'ZnO'	81	NaN	'1.5 h'	'bioluminescence activity assay'	'EC50'	1.1	1.35802e-05	'E.coli'	'Bacteria'	-4.86709	'Ko et al. Appl Microbiol Biotechnol (2014) 98:3295–3303'
'ZnO'	81	71	'30 min'	'Cytotoxicity assays'	'LC50'	0.13	1.60494e-06	'Escherichia Coli'	'Bacteria'	-5.79454	'Dasari et al. J Environ Sci, 2013;25(5):882-8'
'ZnO'	81	NaN	'48 h'	'Cellular proliferation colorimetric assay'	'LD 50'	125	0.00154321	'HeLa cells'	'Human cells'	-2.81158	'Lozano et al 2011 J. Phys.: Conf. Ser. 304 012046'
'ZnO'	81	NaN	'24 h'	'MTT assay'	'LC50'	13.411	0.000165568	'hemocytes'	'other'	-3.78102	'Katsumiti et al. Nanotoxicology. 2016;10(2):185-100'
'ZnO'	81	NaN	'24 h'	'Cellular proliferation colorimetric assay'	'LD 50'	250	0.00308642	'NCl H460'	'Human cells'	-2.51055	'Lozano et al 2011 J. Phys.: Conf. Ser. 304 012046'
'ZnO'	81	NaN	'48 h'	'Cellular proliferation colorimetric assay'	'LD 50'	150	0.00185185	'NCl H460'	'Human cells'	-2.73239	'Lozano et al 2011 J. Phys.: Conf. Ser. 304 012046'
'ZnO'	81	9.8	'48 h'	'Static acute toxicity'	'LC50'	573.8	0.00708395	'P. multimicronucleatum'	'Eukaryotes & Microalgae'	-2.14972	'Li et al. 2012, Chem. Res. Toxicol, 25, 1675−1681'
'ZnO'	81	13.6	'24 h'	'Viability assay'	'ec50'	3.9	4.81481e-05	'Tetrahymena thermophila'	'Eukaryotes & Microalgae'	-4.31742	'Bondarenko et al. Nanotoxicology, 2016; 10(9): 1229–1242'
'ZnO'	81	20.4	'24 h'	'Viability assay'	'EC50'	1.84	2.2716e-05	'Tetrahymena thermophila'	'Eukaryotes & Microalgae'	-4.64367	'Aruoja et al Environ. Sci.: Nano, 2015,2, 630-644'
'ZnO'	81	20.4	'30 min'	'luminescence inhbition'	'EC50'	11.52	0.000142222	'Vibrio Fischeri'	'Bacteria'	-3.84703	'Aruoja et al Environ. Sci.: Nano, 2015,2, 630-644'
'ZnO'	81	NaN	'30 min'	'bioluminescence inhibition assay'	'EC50'	7.276	8.98272e-05	'Vibrio fischeri'	'Bacteria'	-4.04659	'Sovova et al., 2009, Proceedings,NANOCON Conference, Roznov , Czech Republic, pp 62‐71,'
'ZnO'	81	NaN	'30 min'	'bioluminescence inhibition assay'	'EC50'	1.9	2.34568e-05	'Vibrio fischeri'	'Bacteria'	-4.62973	'Heinlaan et al. Chemosphere 2008; 71 (7) 1308-1316'
'ZrO2'	123	40.1	'24 h'	'ATP assay'	'EC50'	NaN	NaN	'BEAS-2B cells, ATP assay'	'Human cells'	NaN	'Zhang et al. ACS Nano 2012, 6, 5, 4349–4368'
'ZrO2'	123	40.1	'24 h'	'MTS assay'	'EC50'	NaN	NaN	'BEAS-2B cells, MTS assay'	'Human cells'	NaN	'Zhang et al. ACS Nano 2012, 6, 5, 4349–4368'
'ZrO2'	123	NaN	'24 h'	'MTT assay'	'ec50'	1000	0.00813008	'Hacat'	'Human cells'	-2.08991	'Horie et al. Metallomics, 2012, 4, 350–360'
